# Supplementary material
Source: PubMed Central journal article supplement (PMC7318068)

## **Supplemental Figures (S1 – S22)**

## **Supplemental Tables (S1 – S2)**

## **Related Supplemental File, pertaining to:**

- Additional replicates and full-view gels/blots
- Log-plot of cytotoxic plots in Figure 4
- Flow-cytometry analysis (related to Table S2)

**Figure S1**

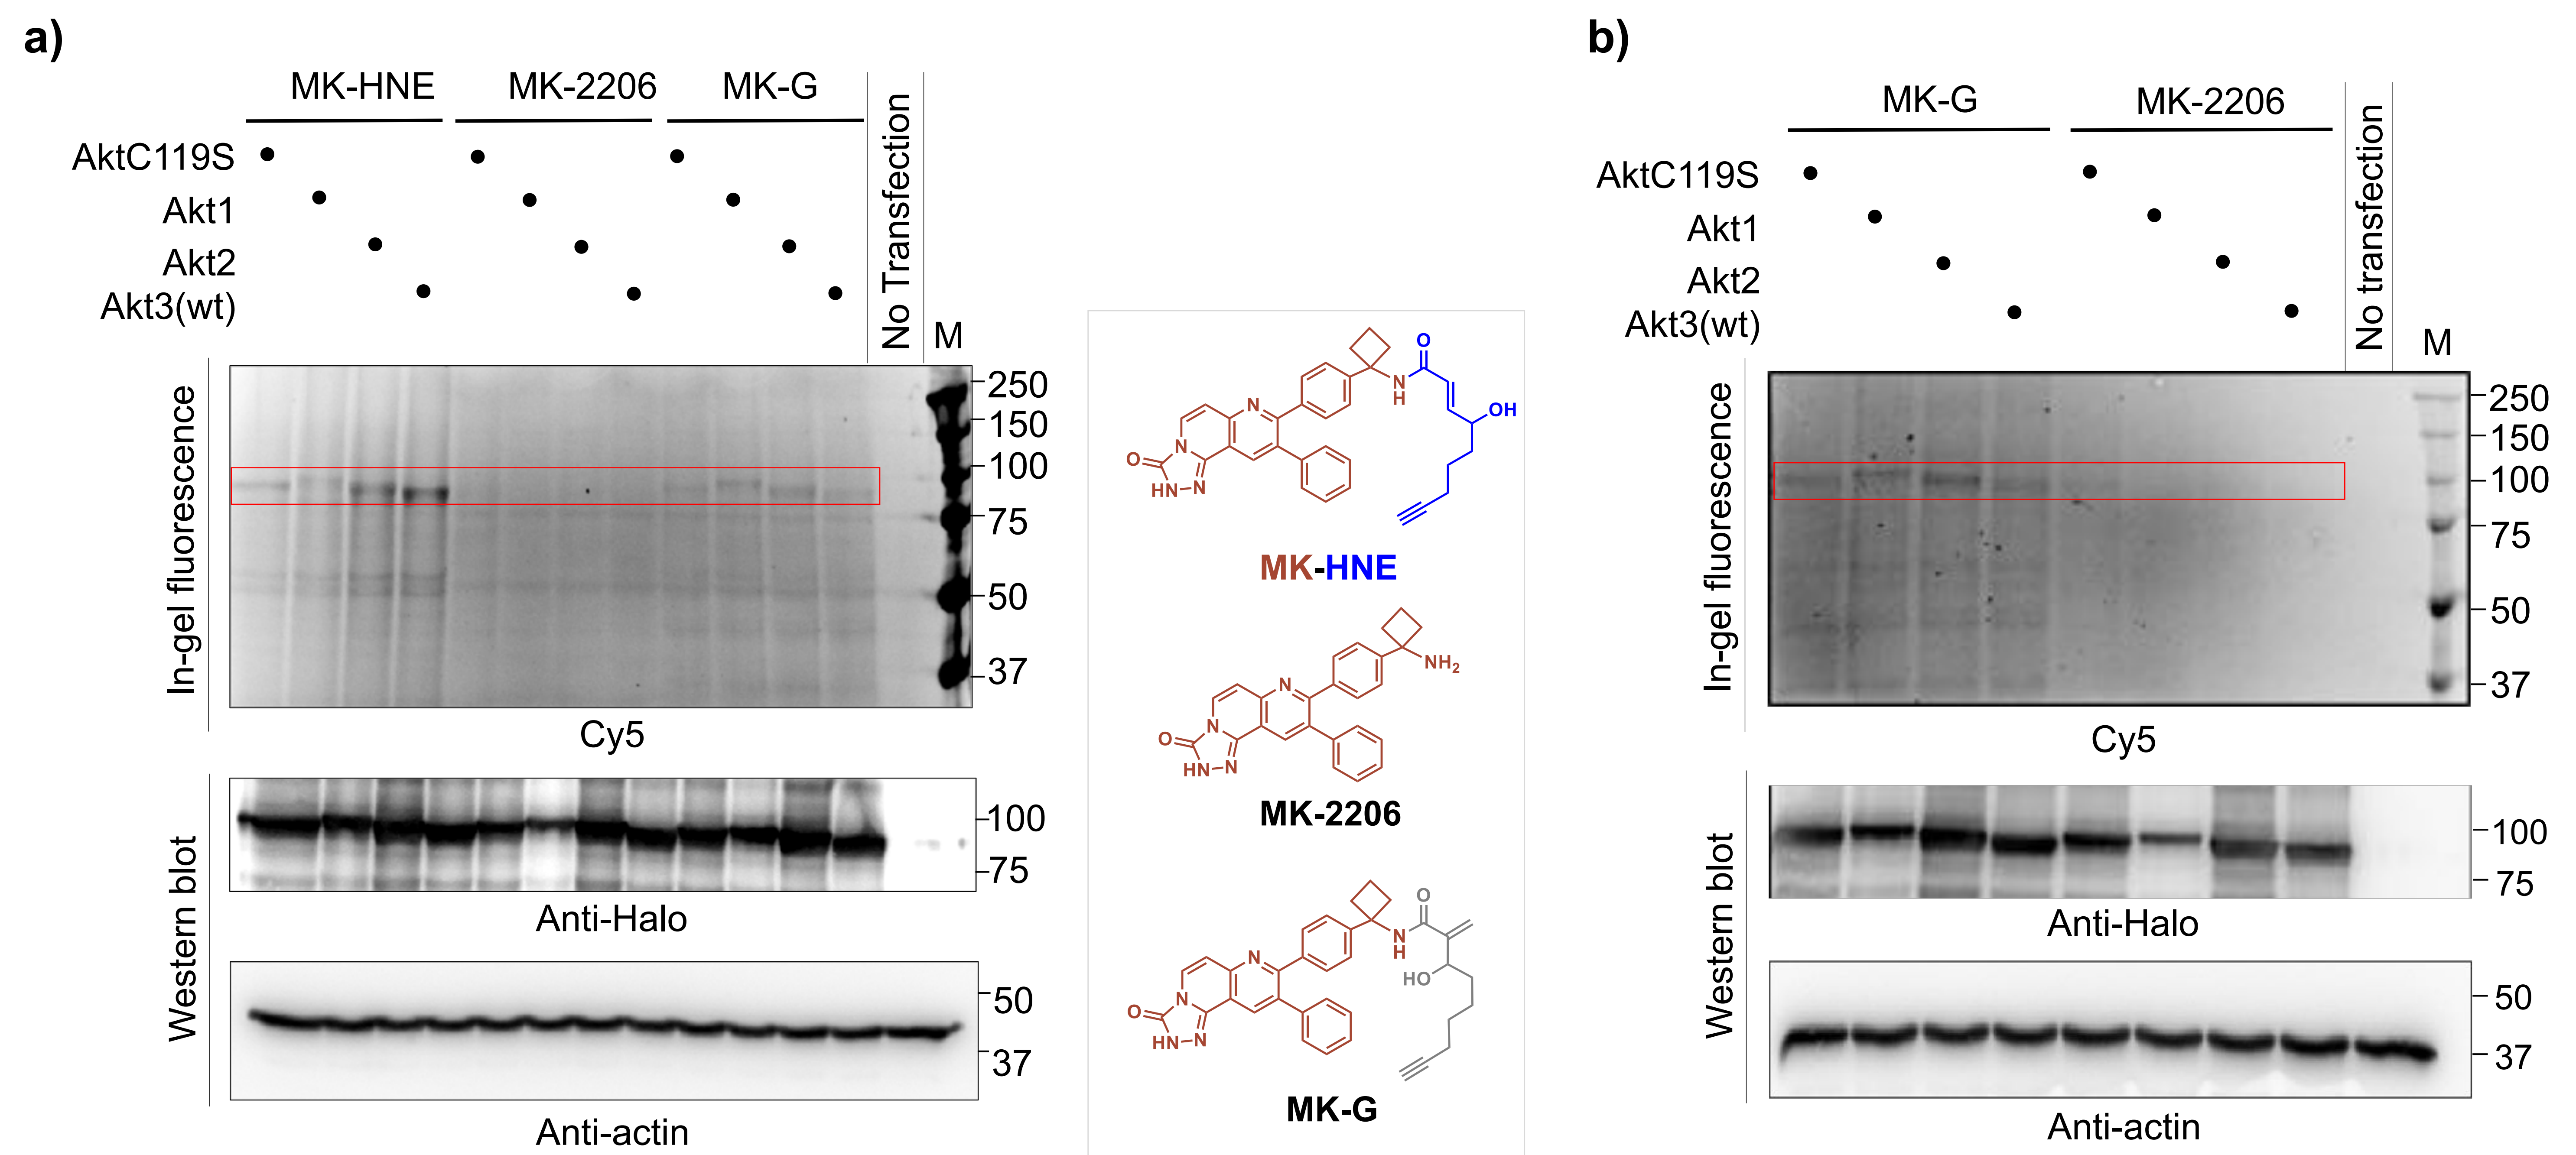

Figure S2

Halo-Akt3

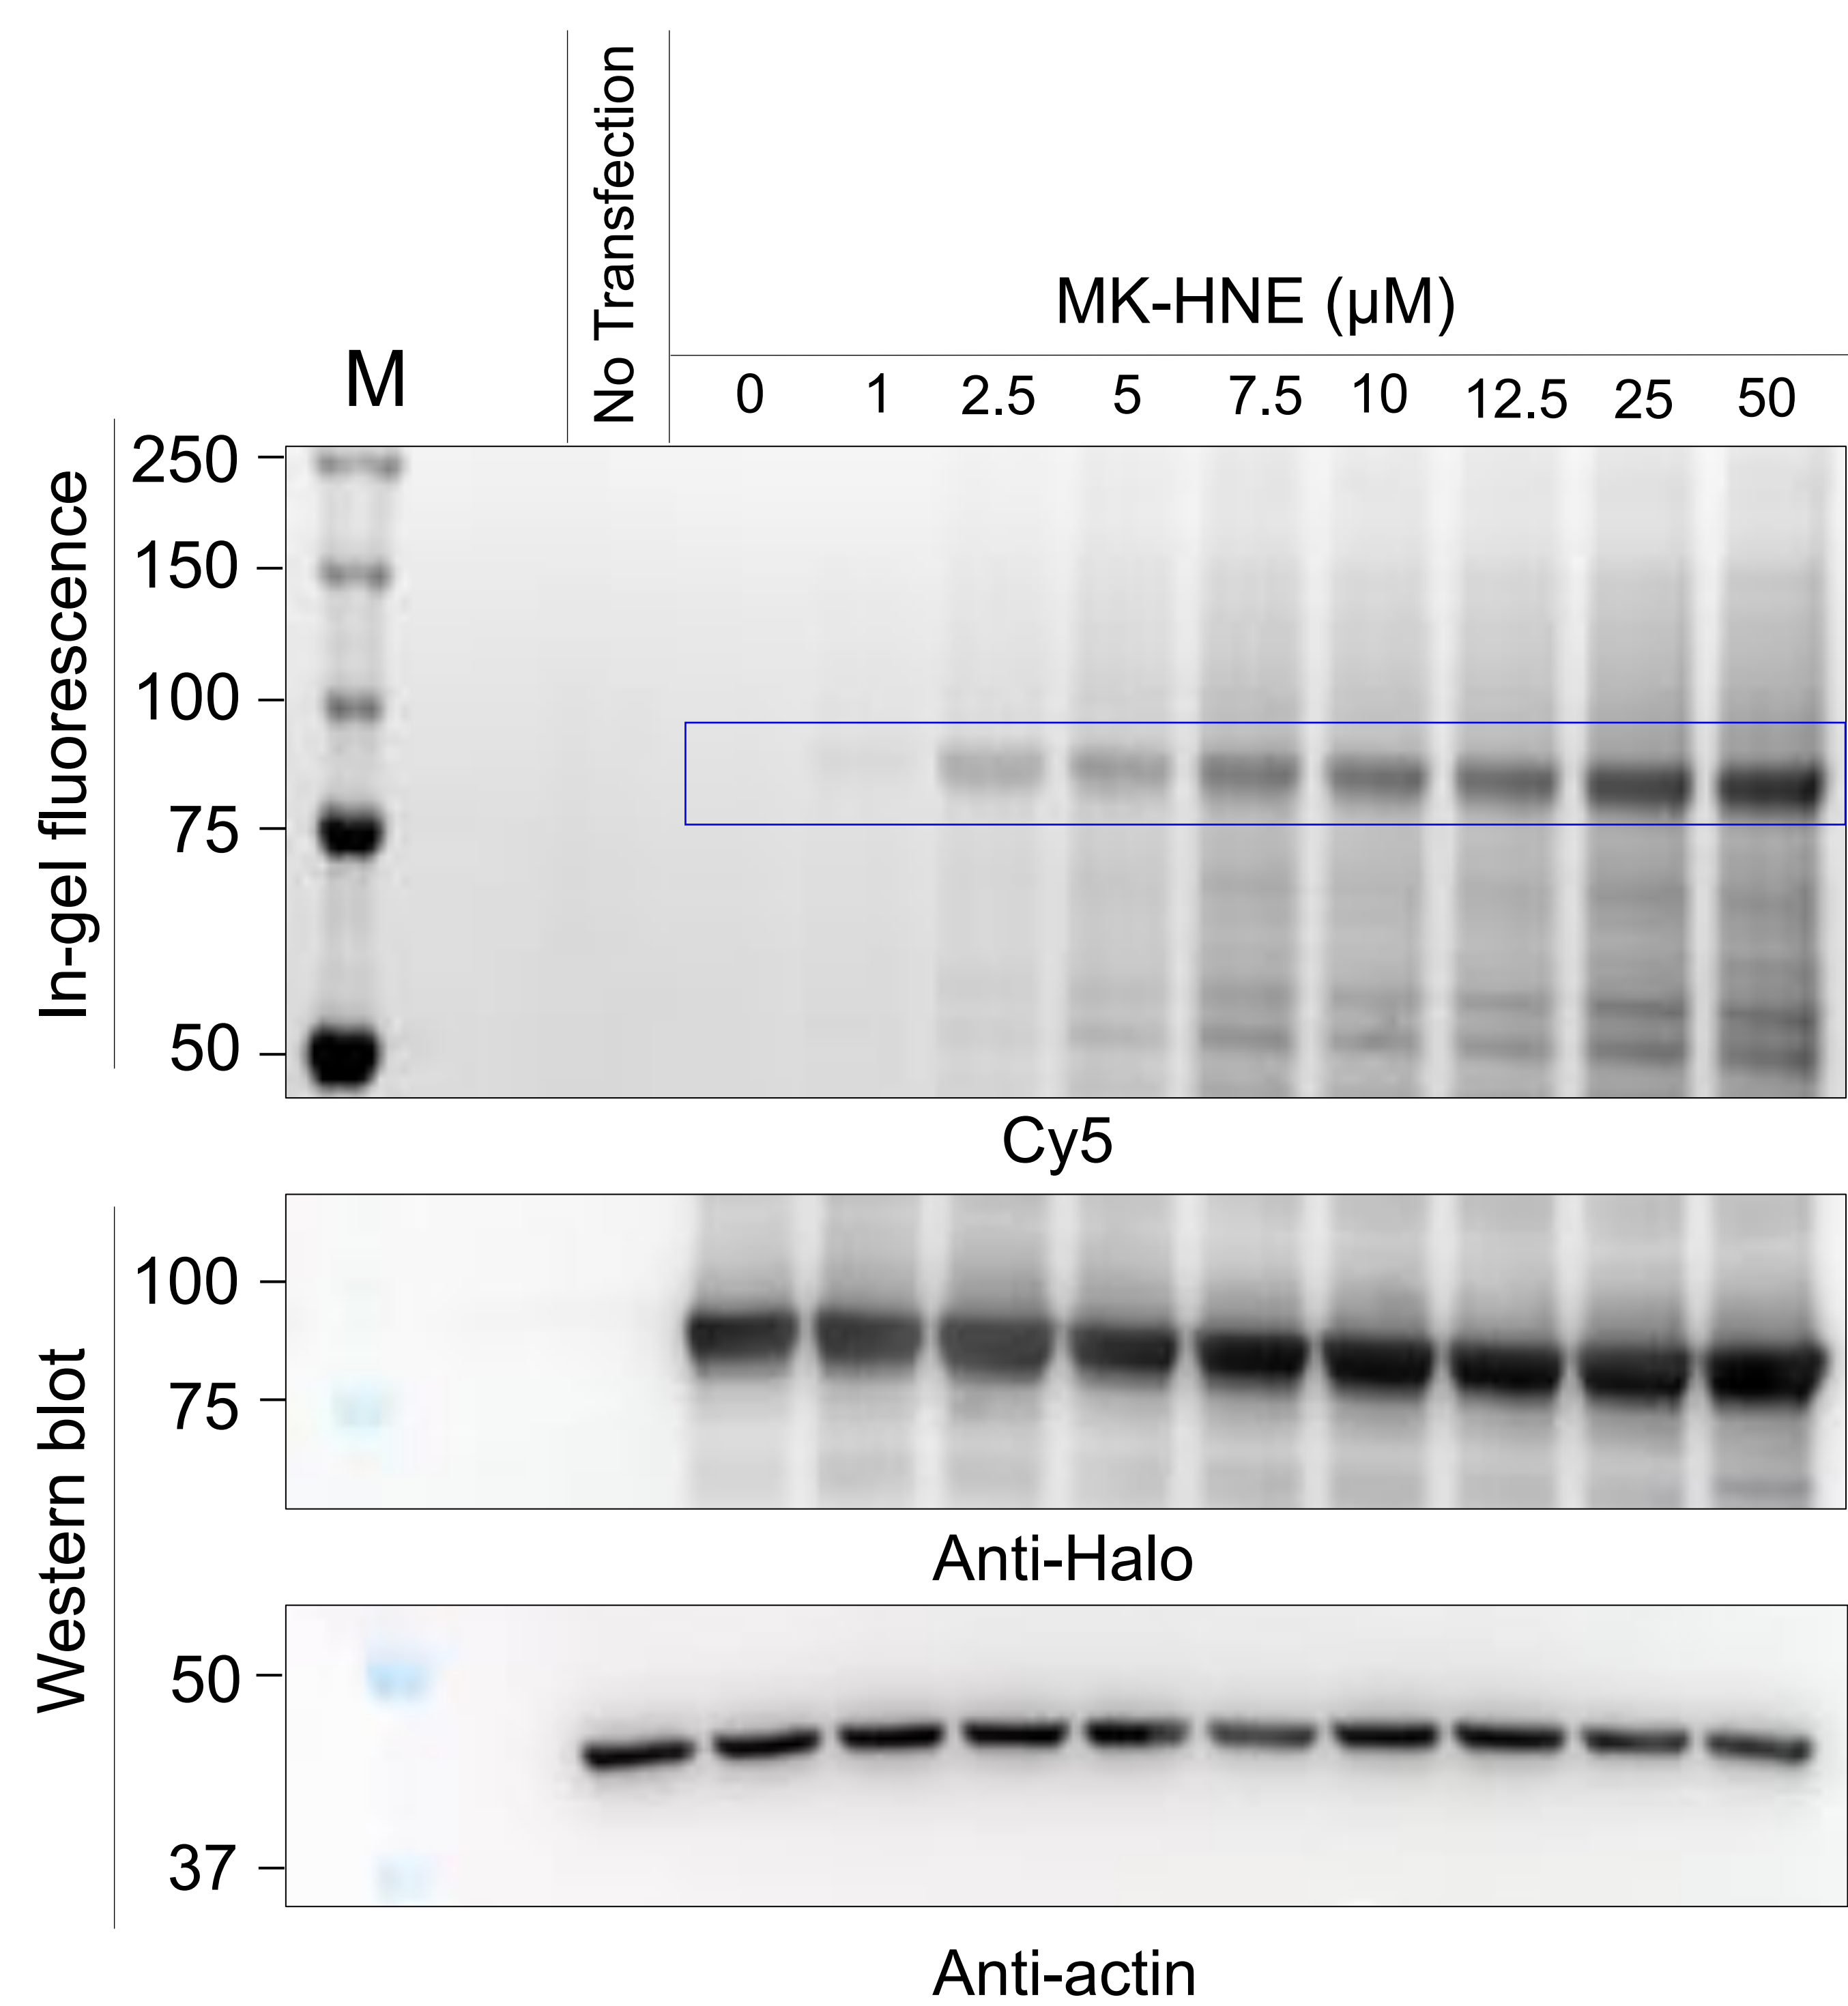

Halo-Akt2

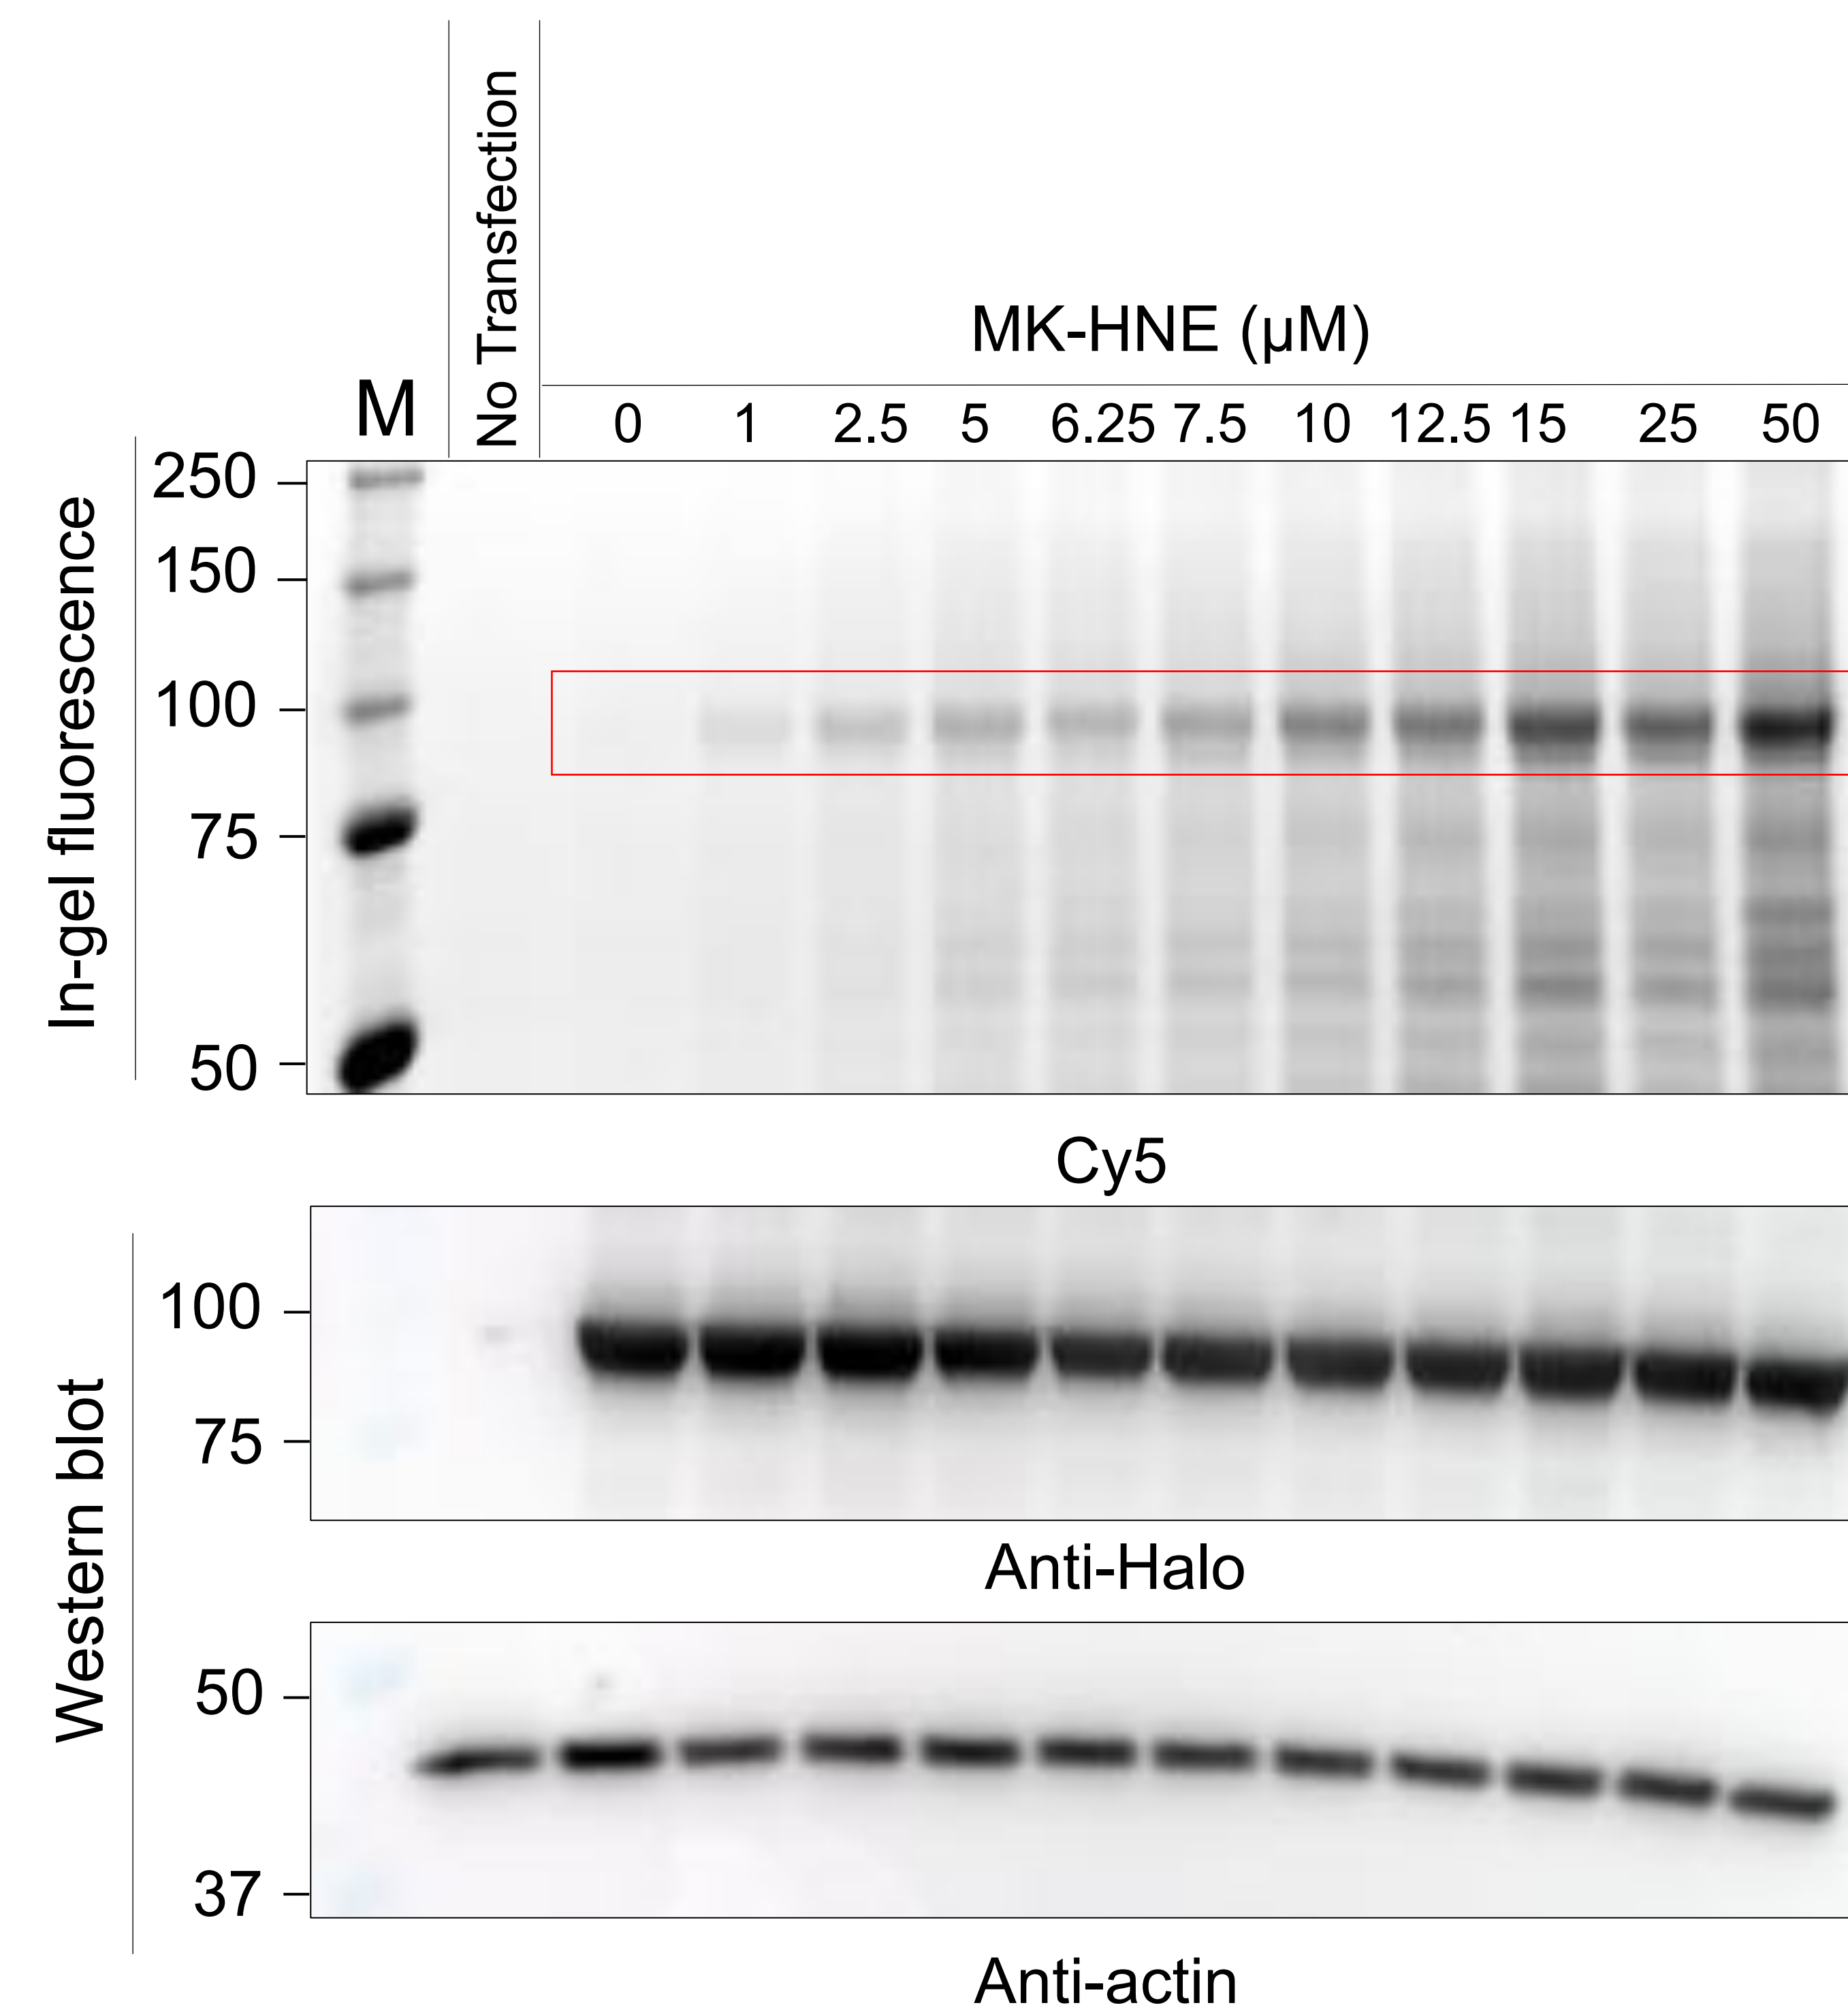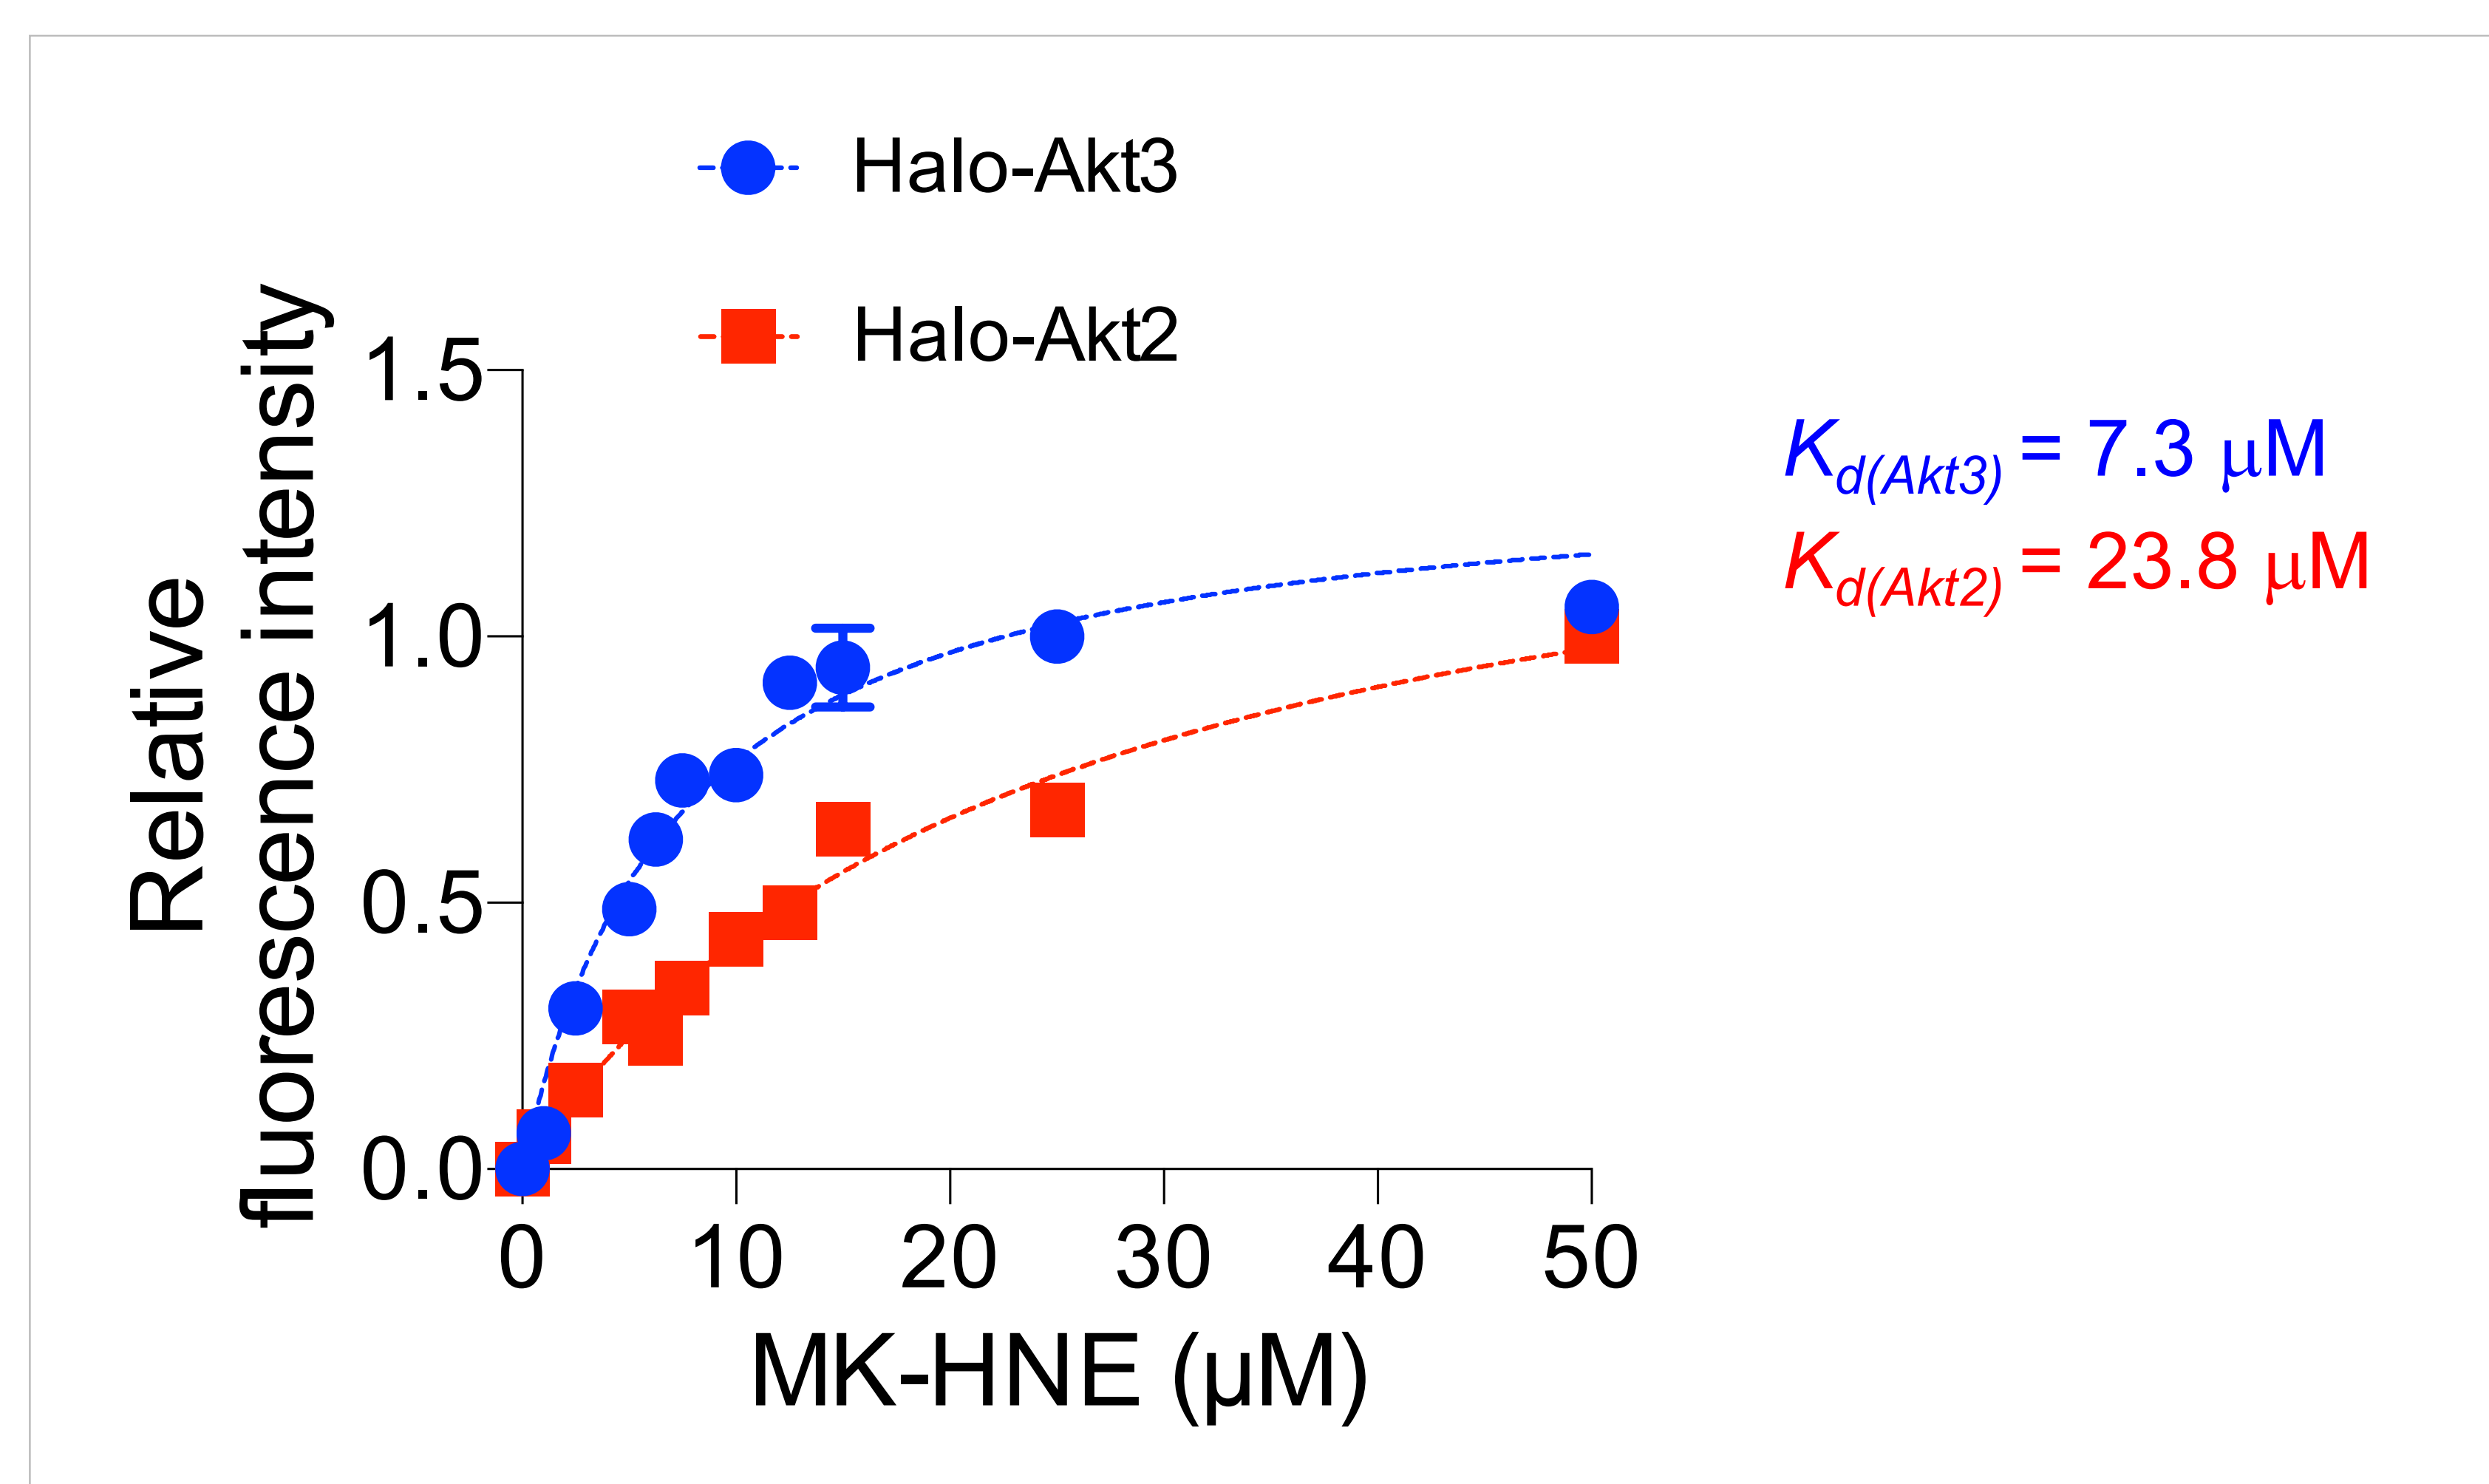

**Figure S3**

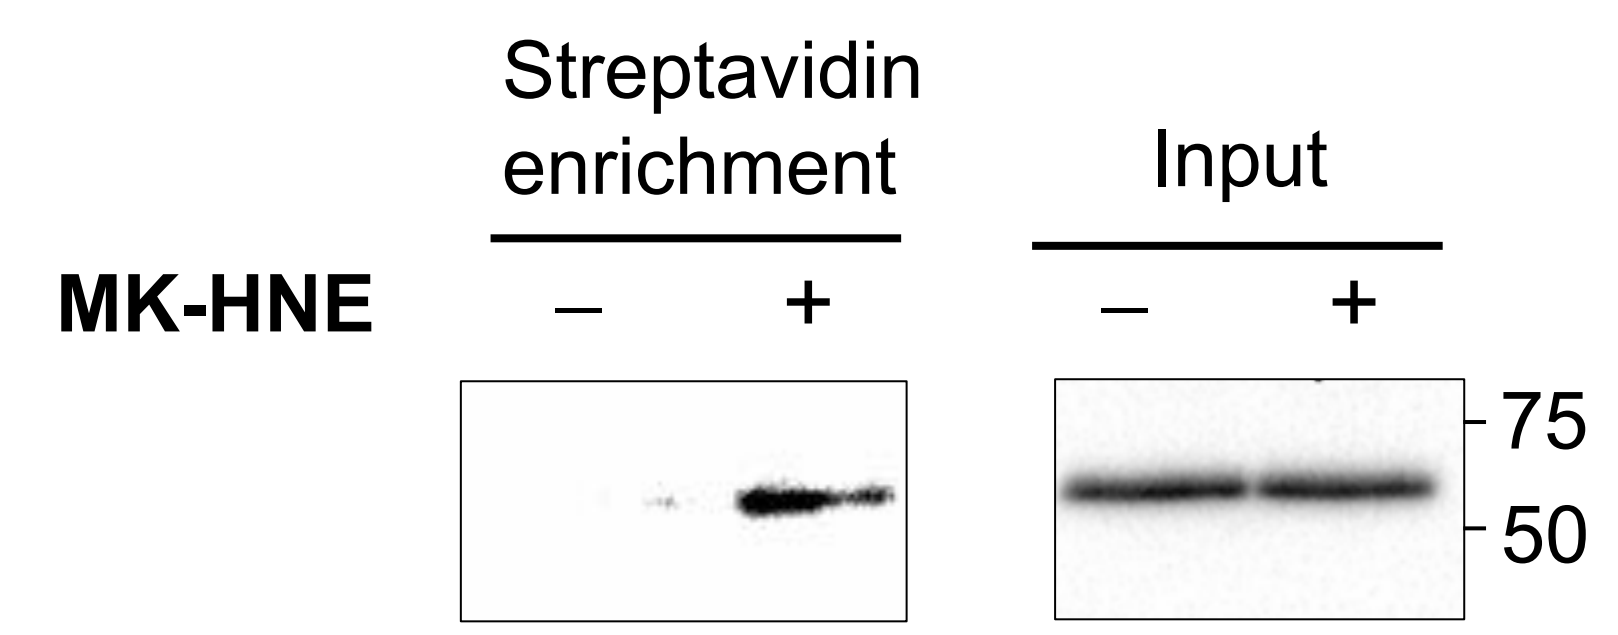

Figure S4

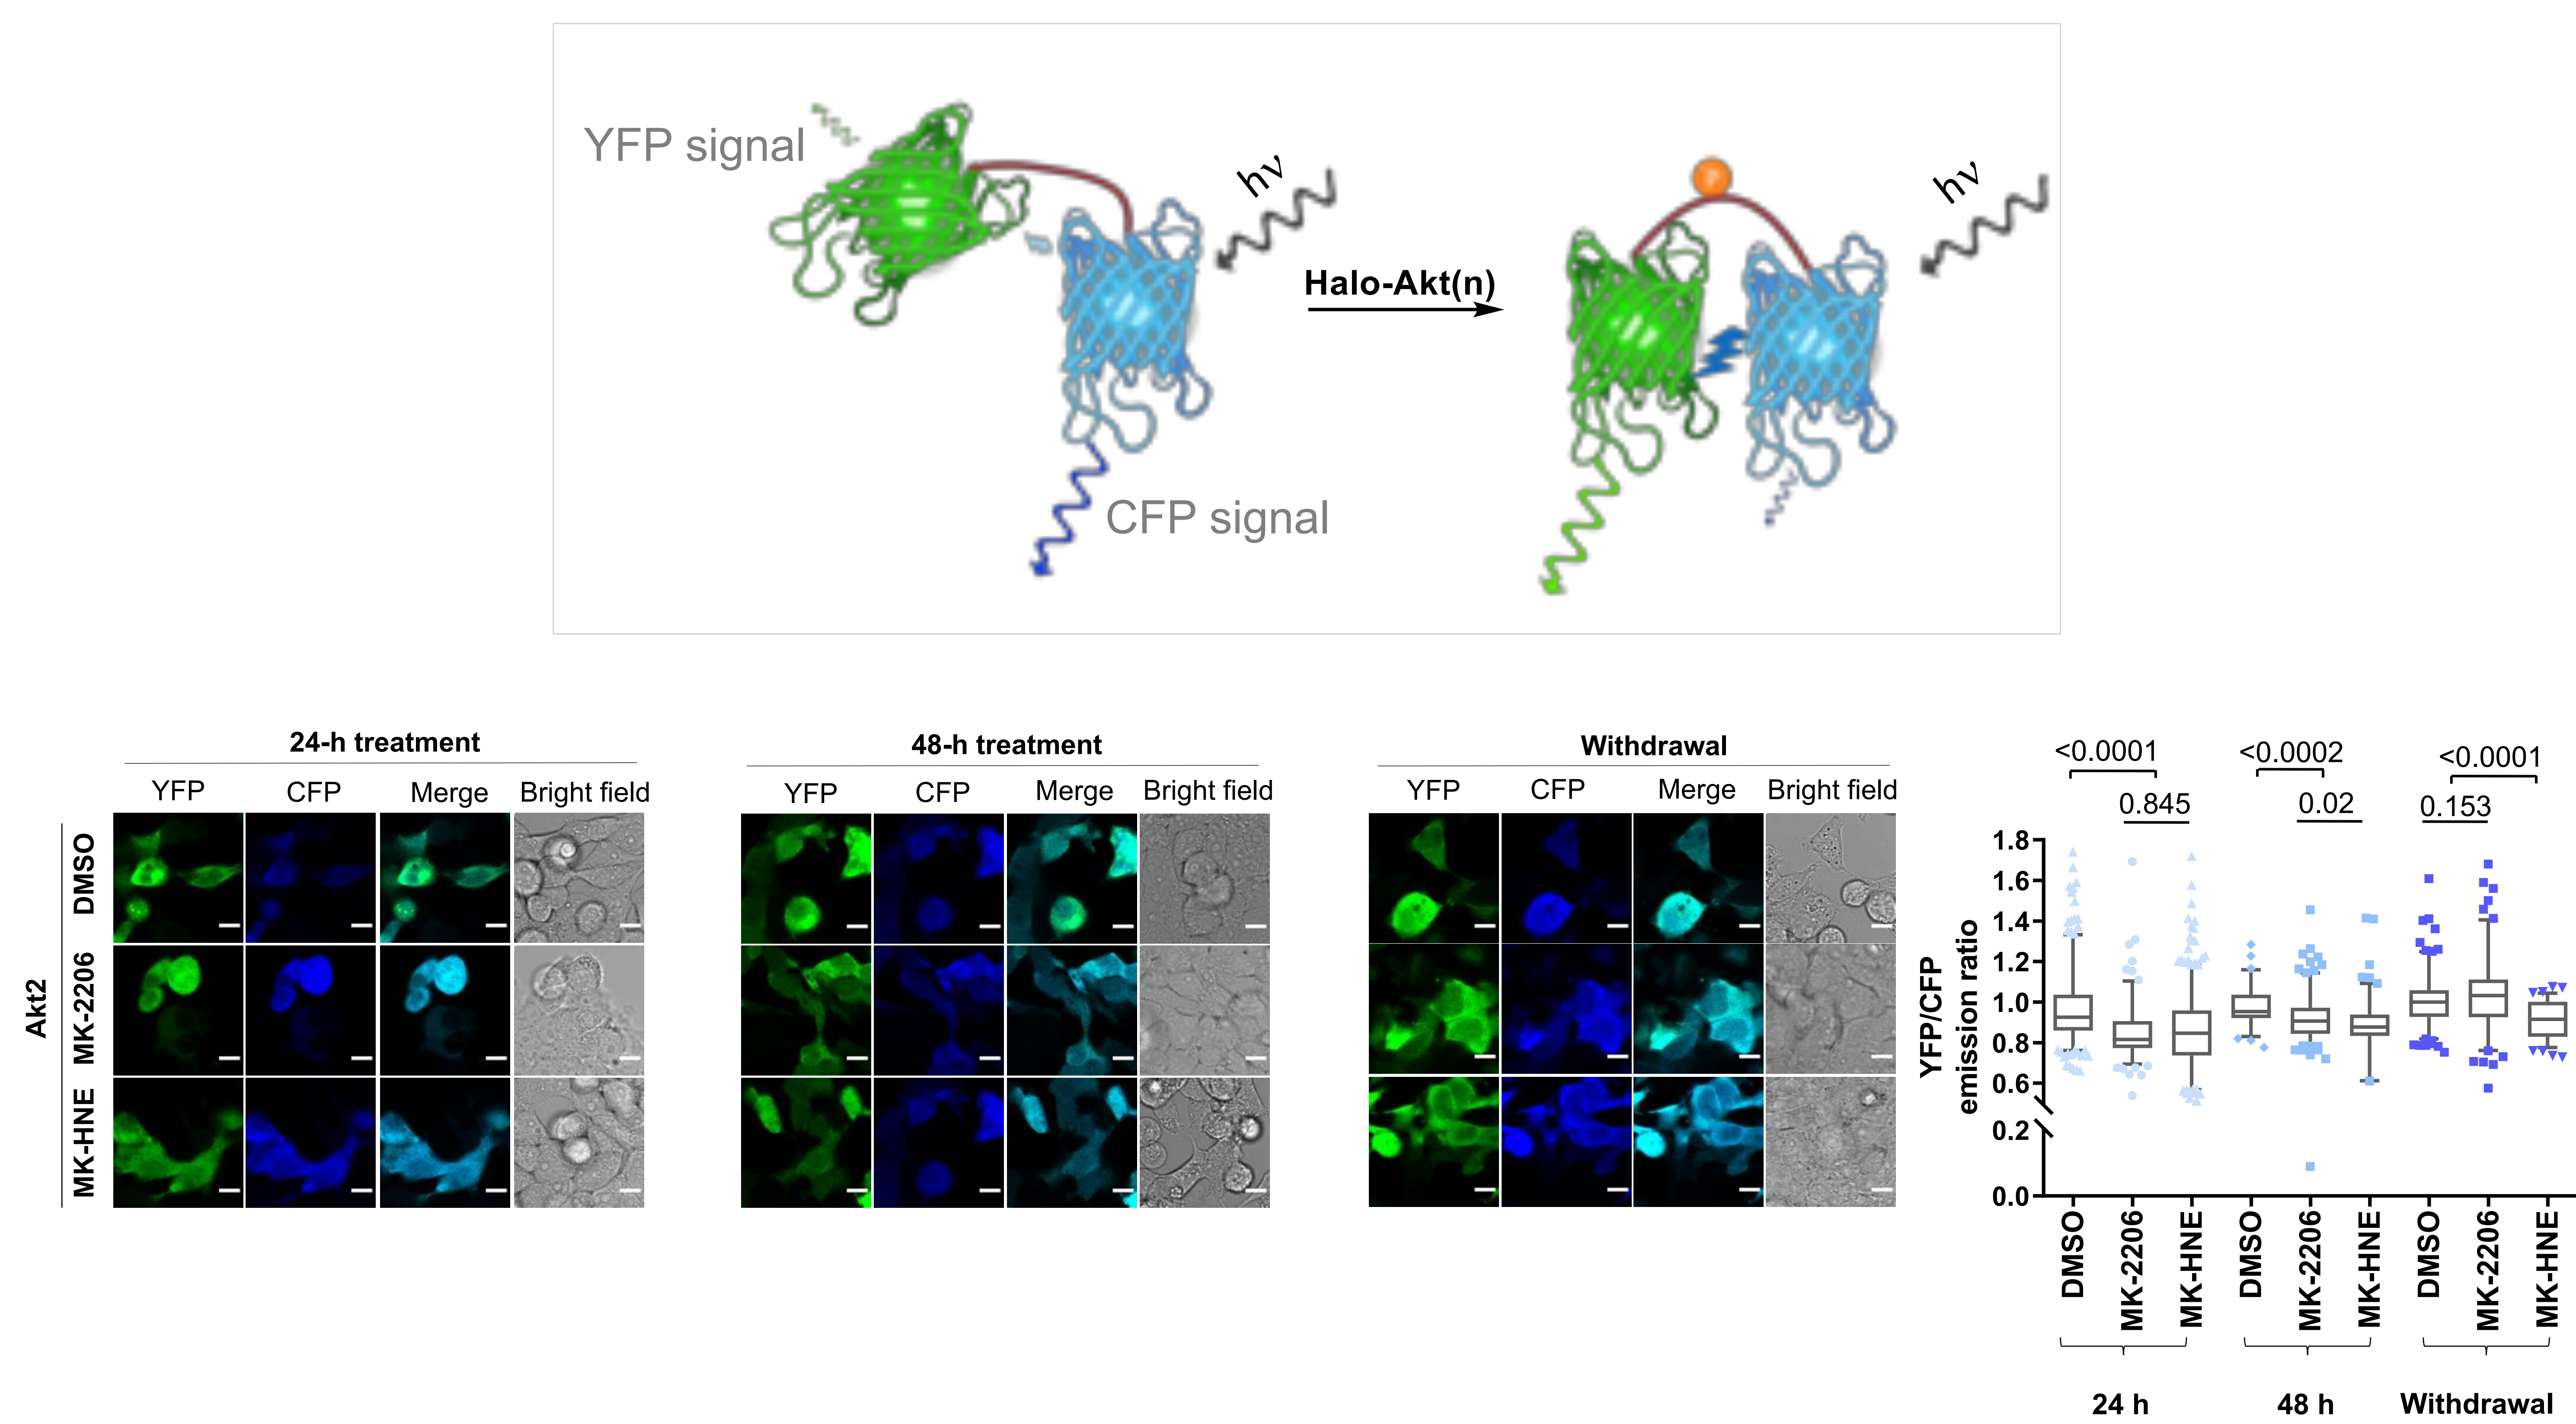

Figure S5

a) Western blot

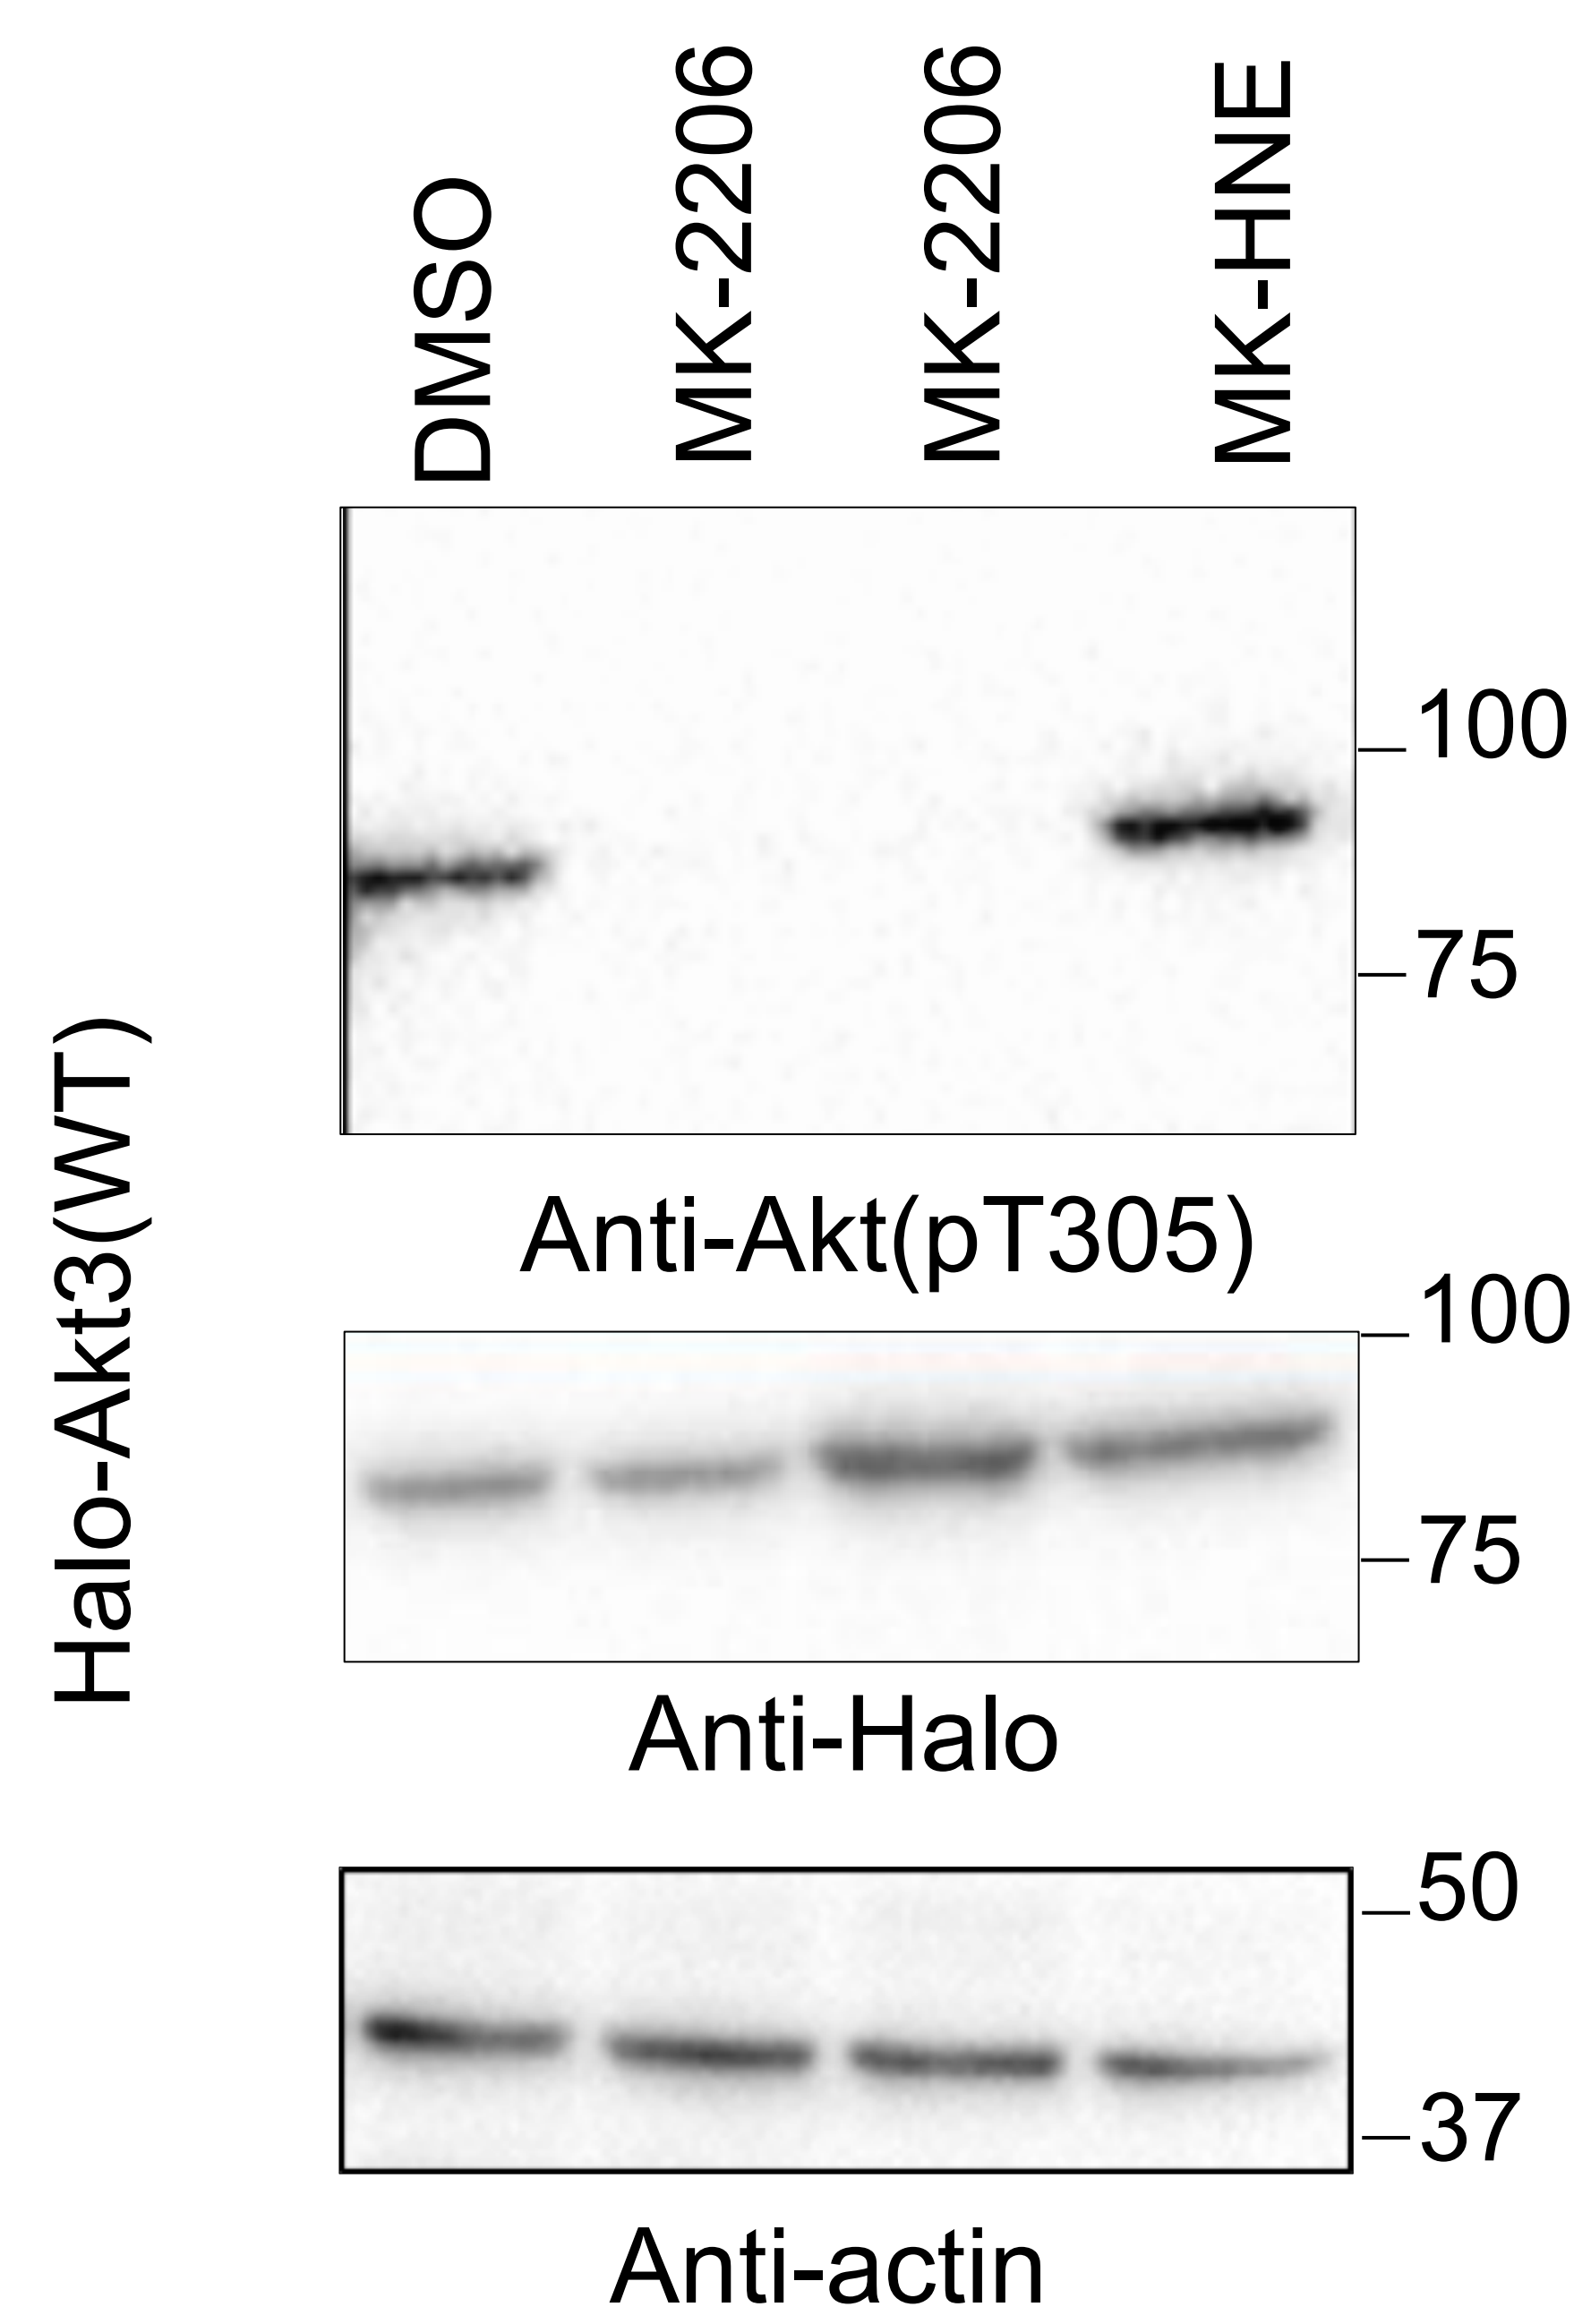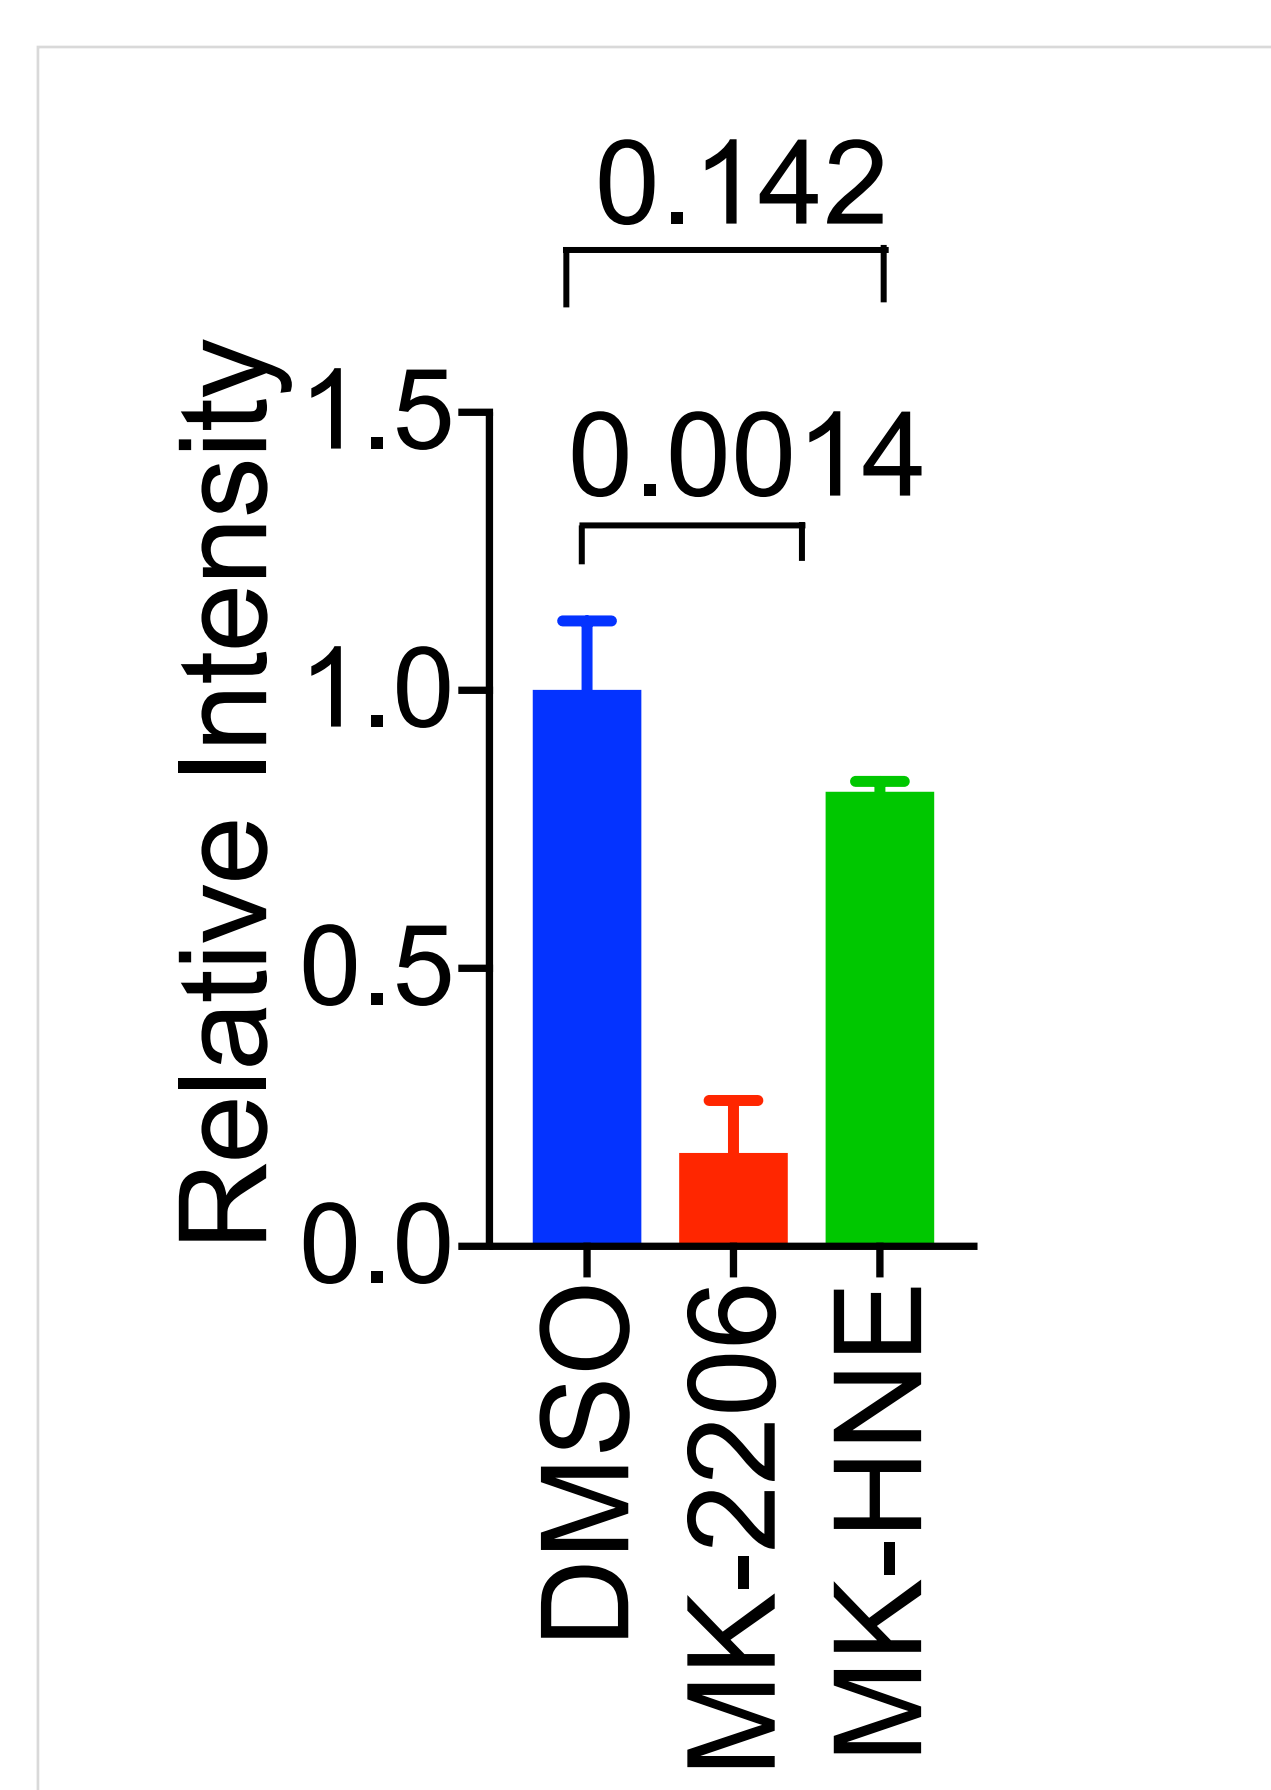

b) ELISA

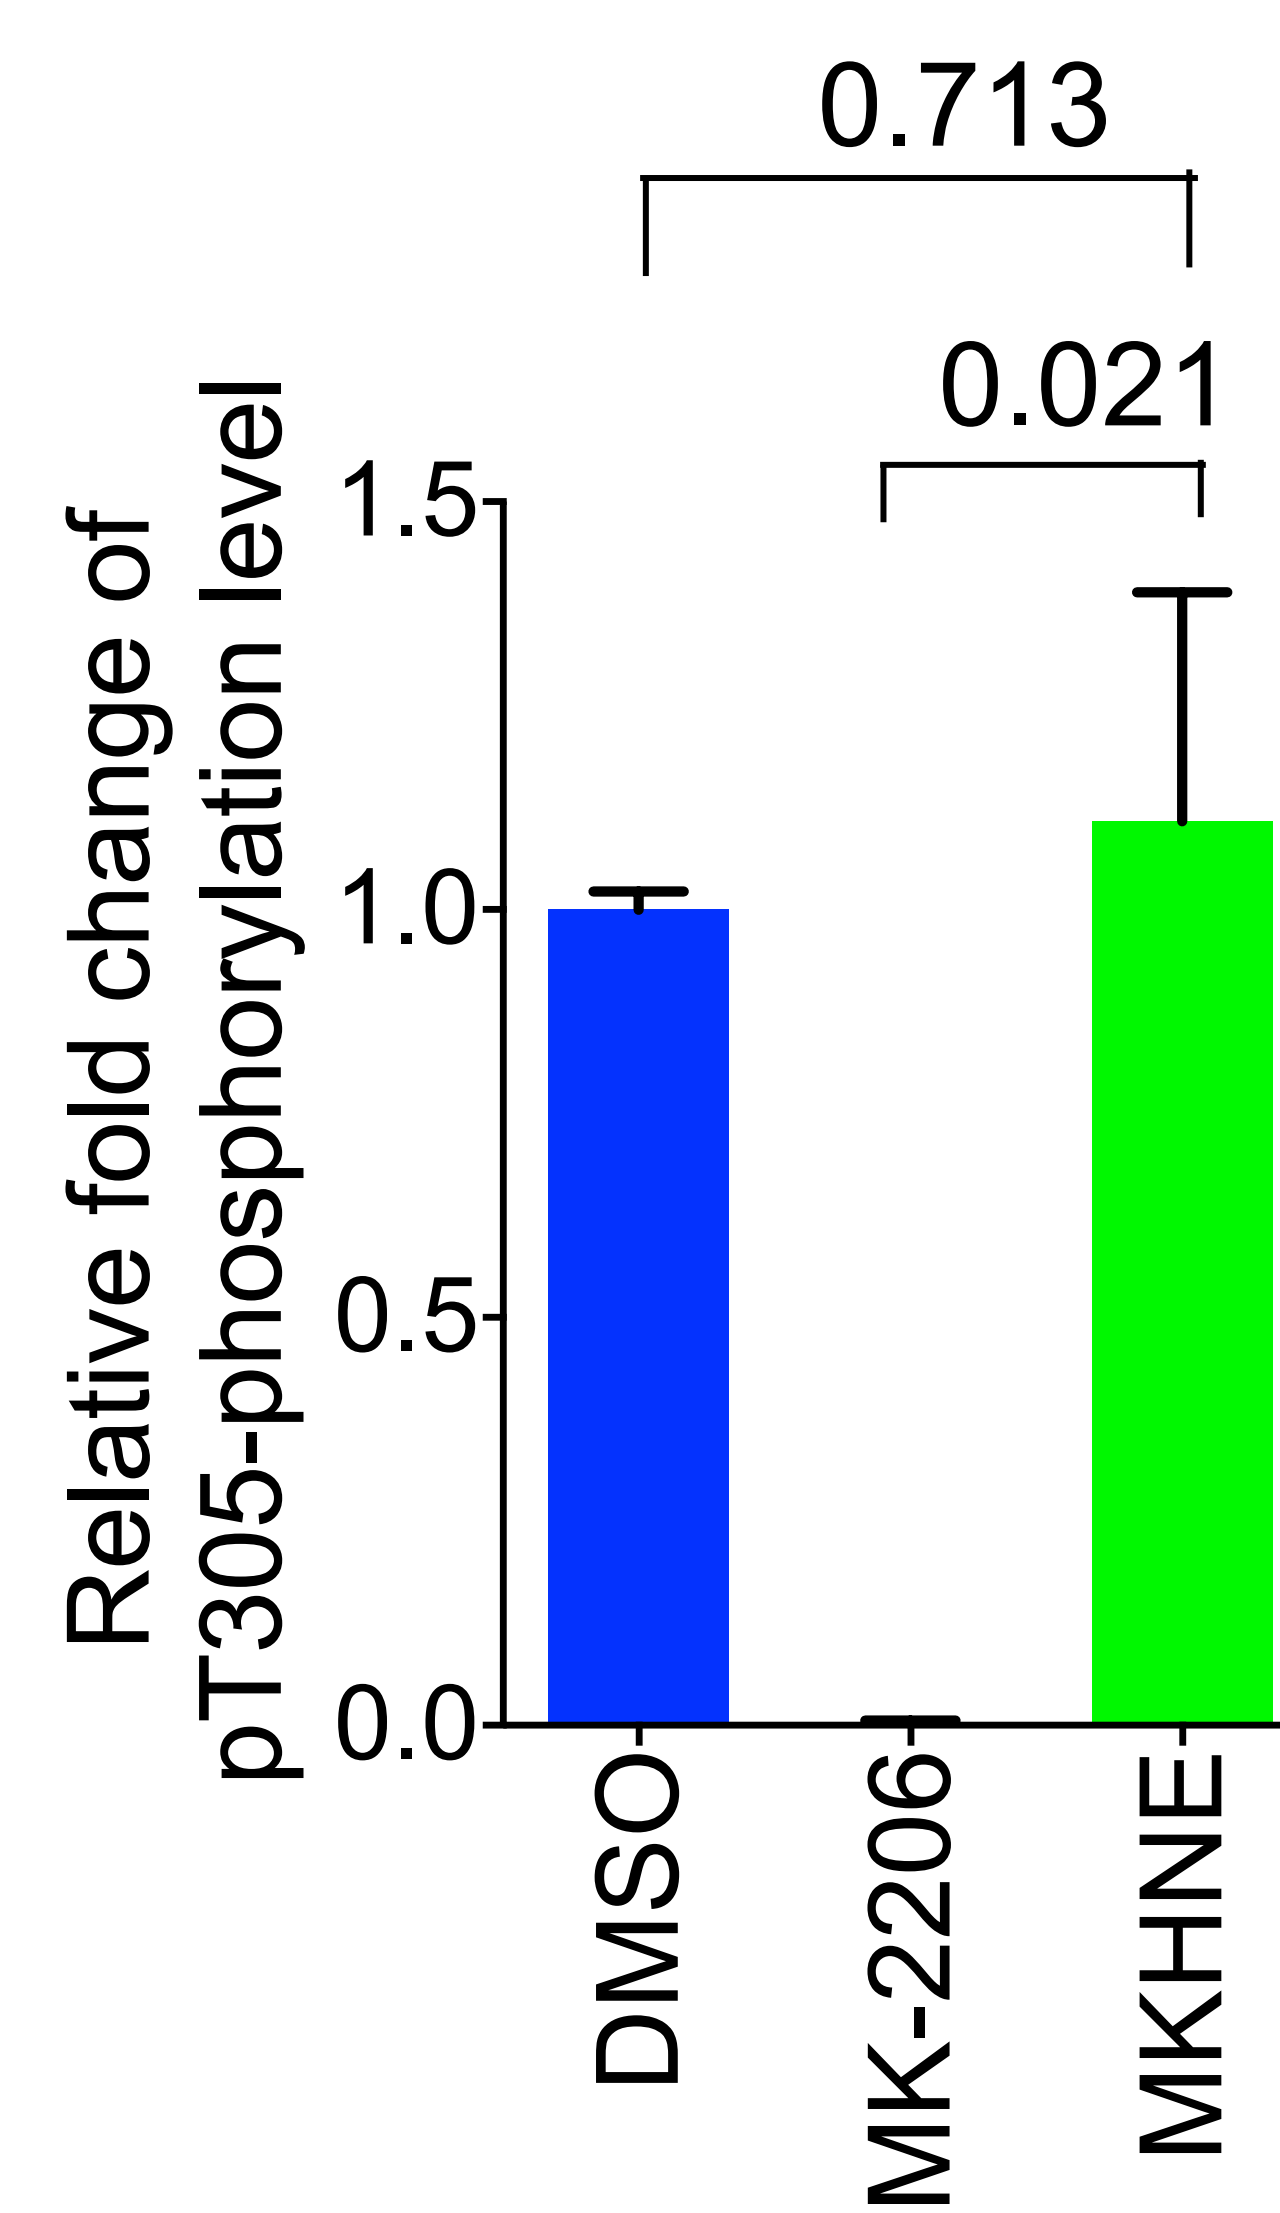

Figure S6

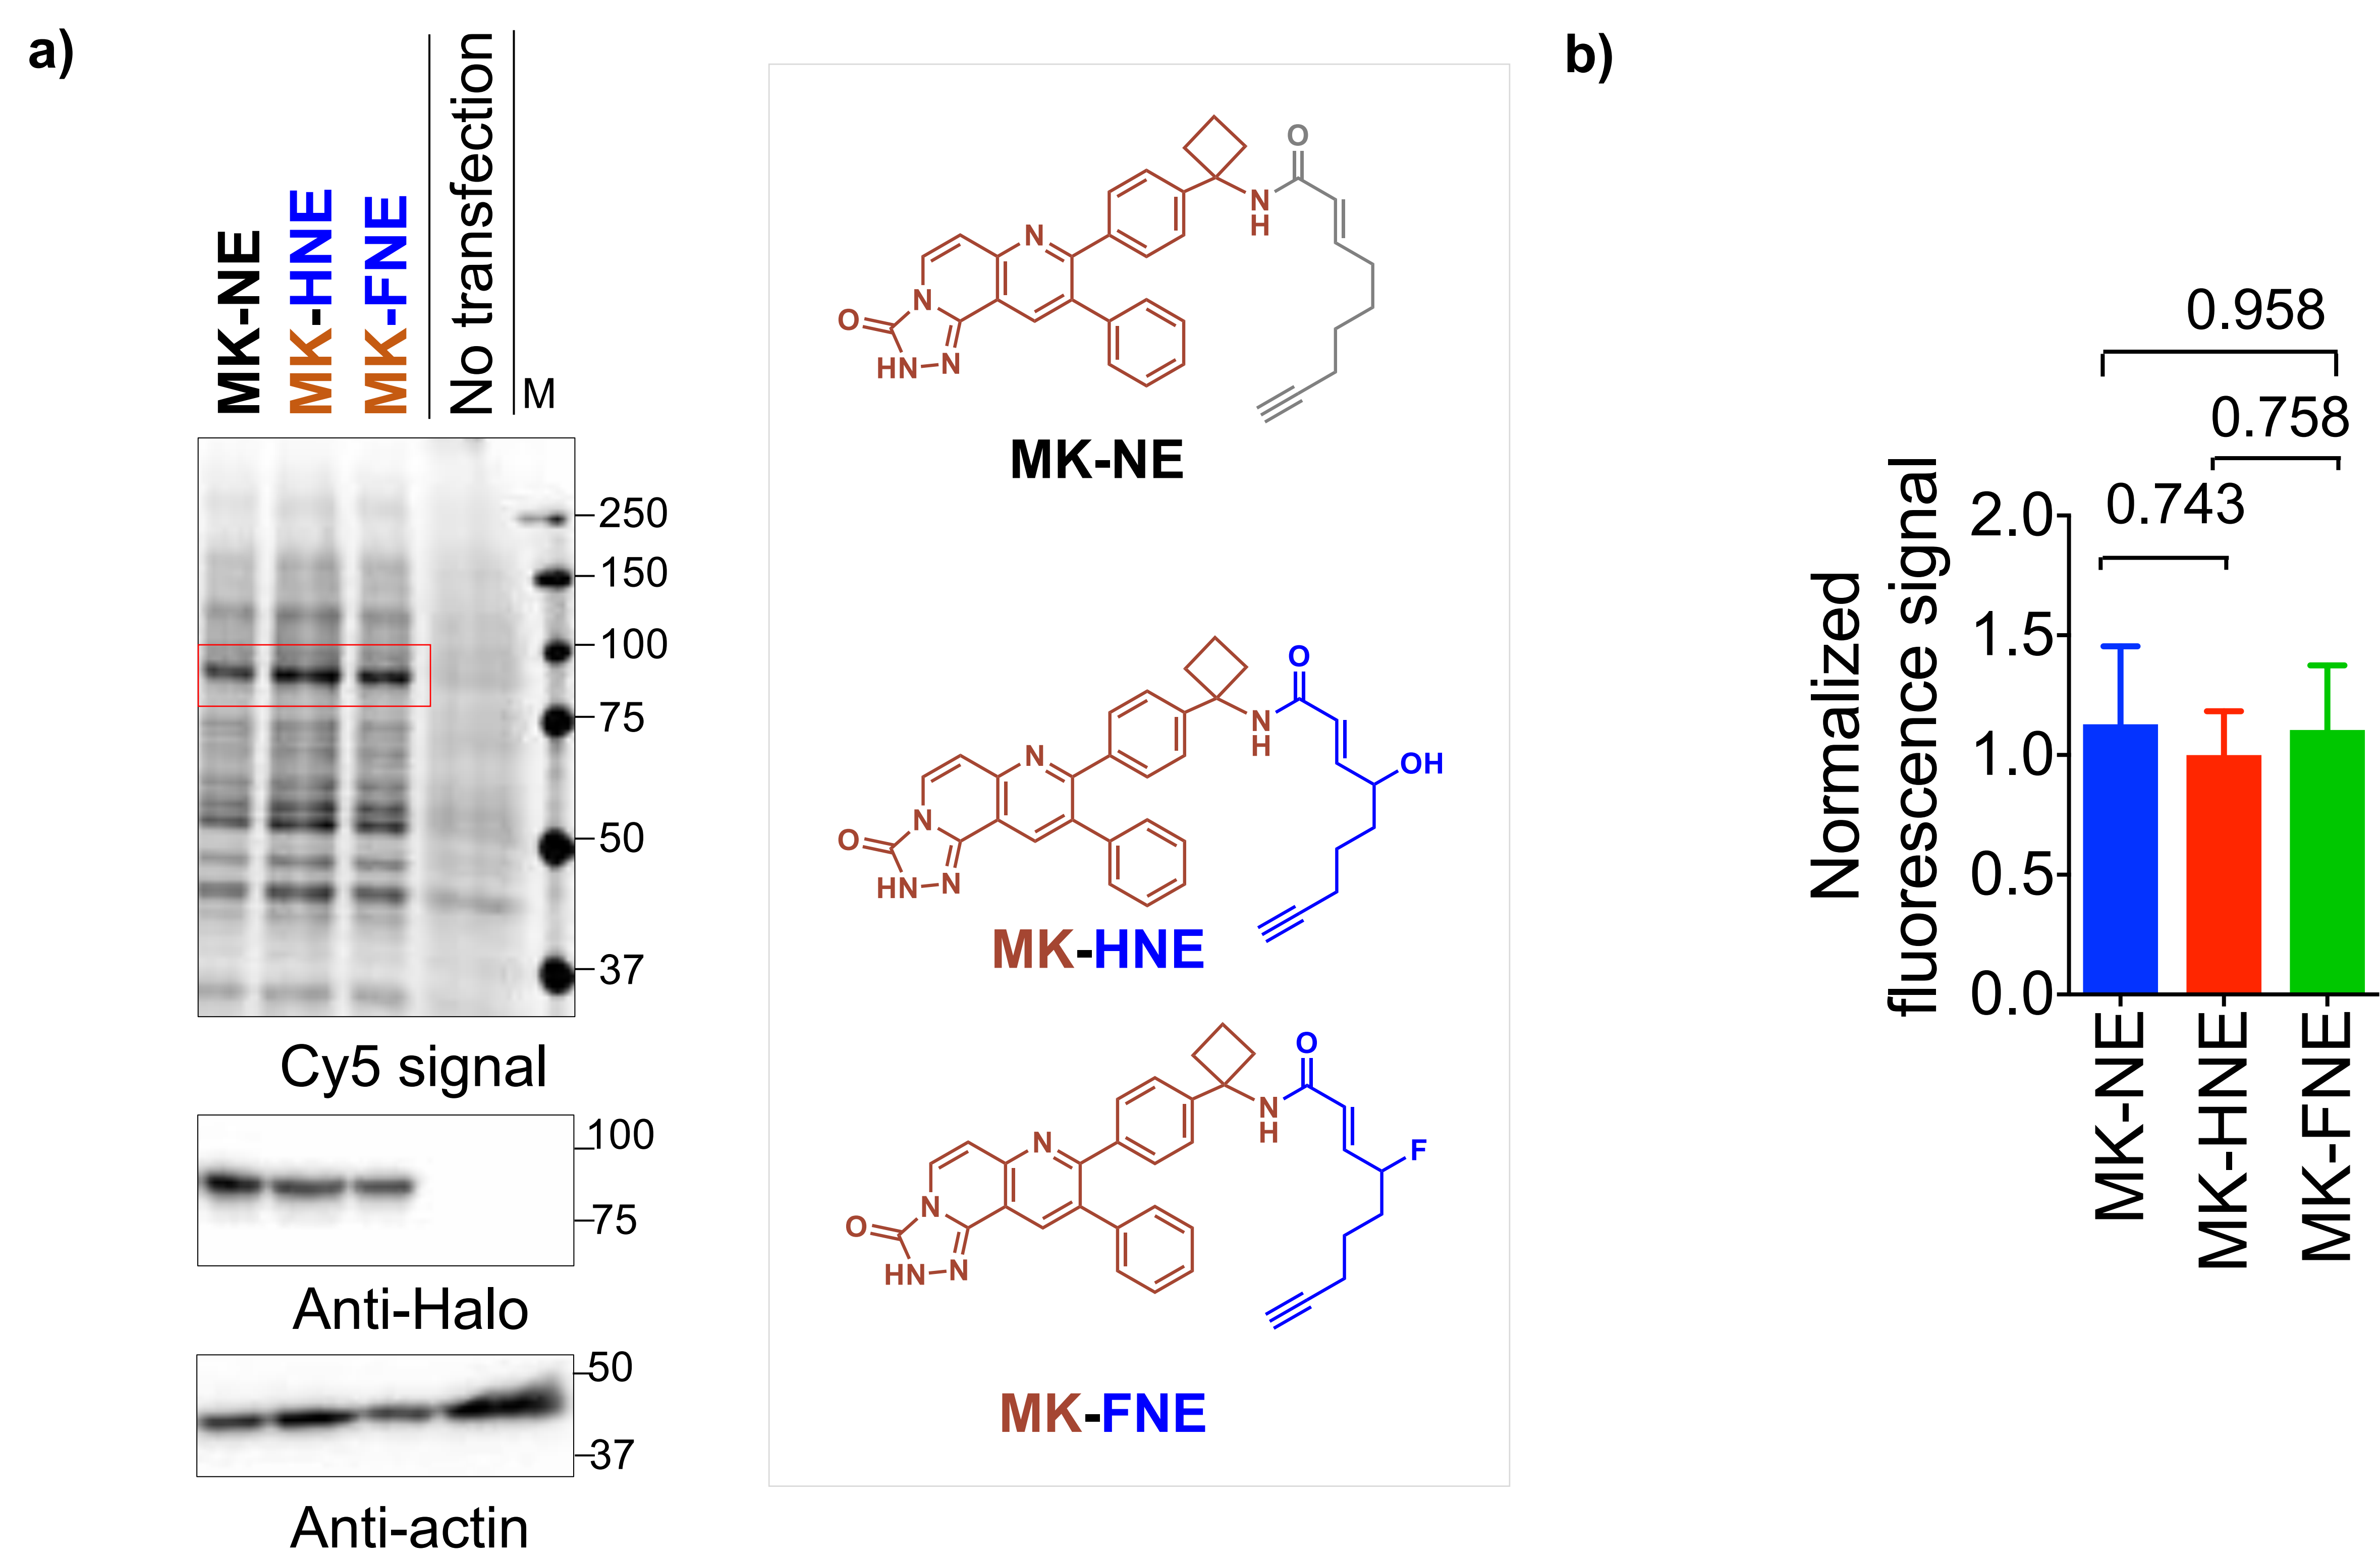

Figure S7

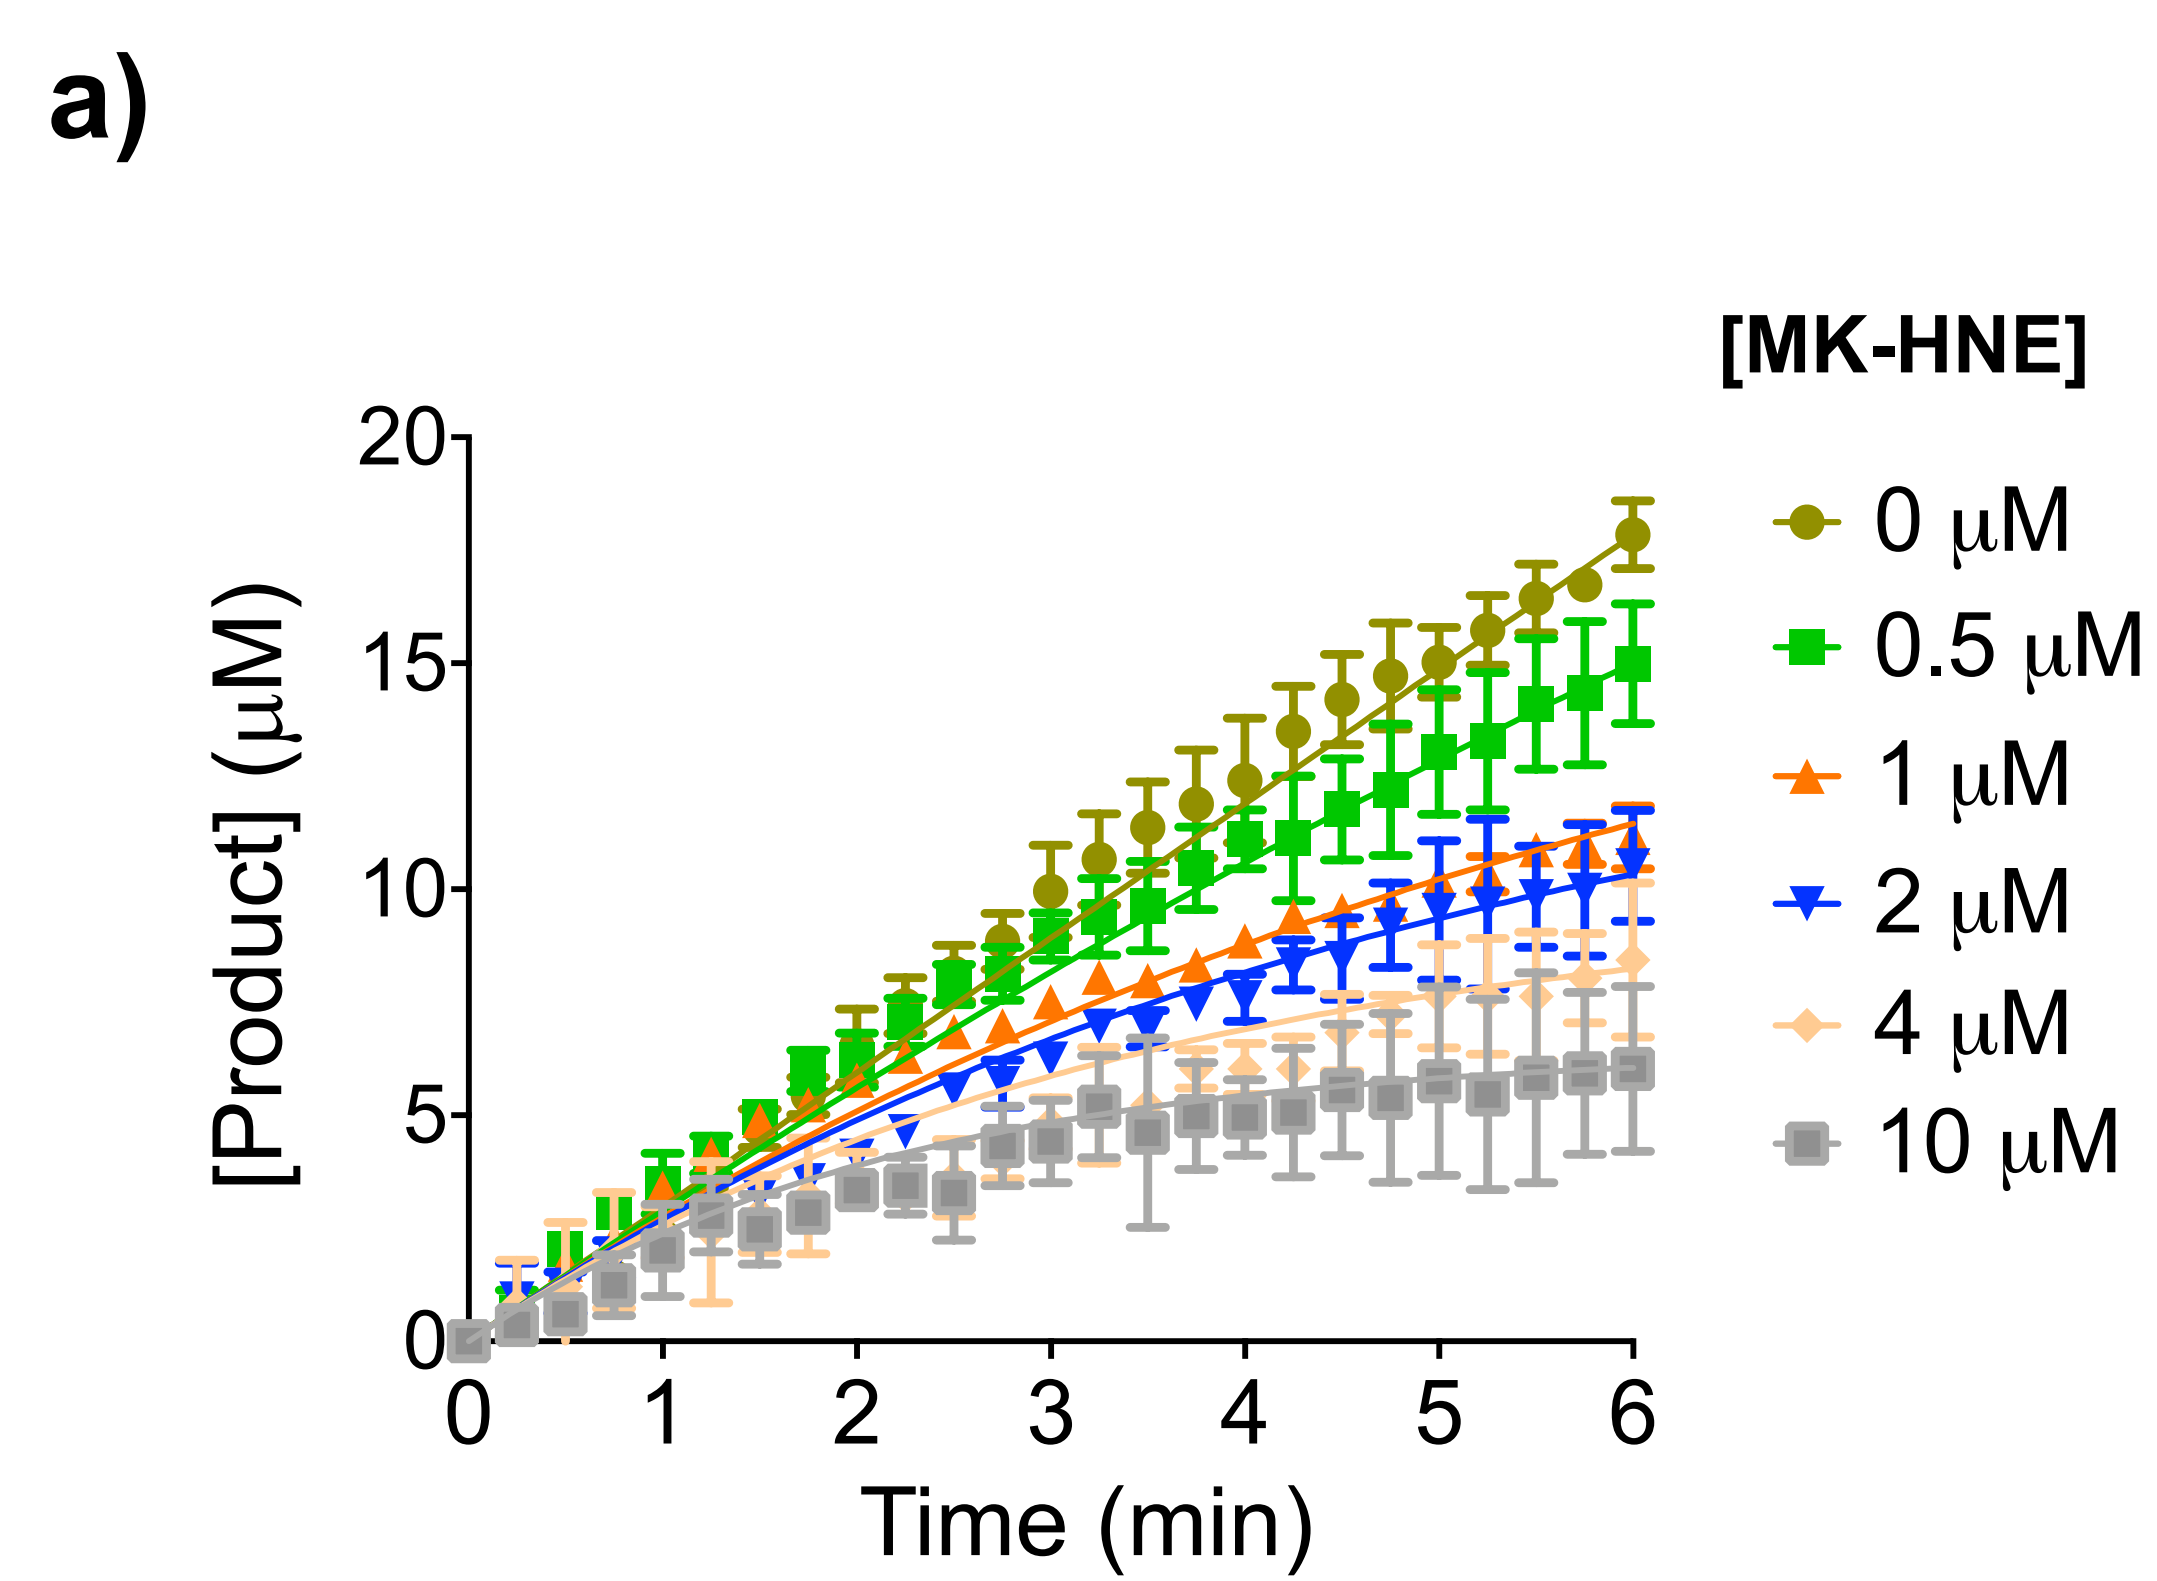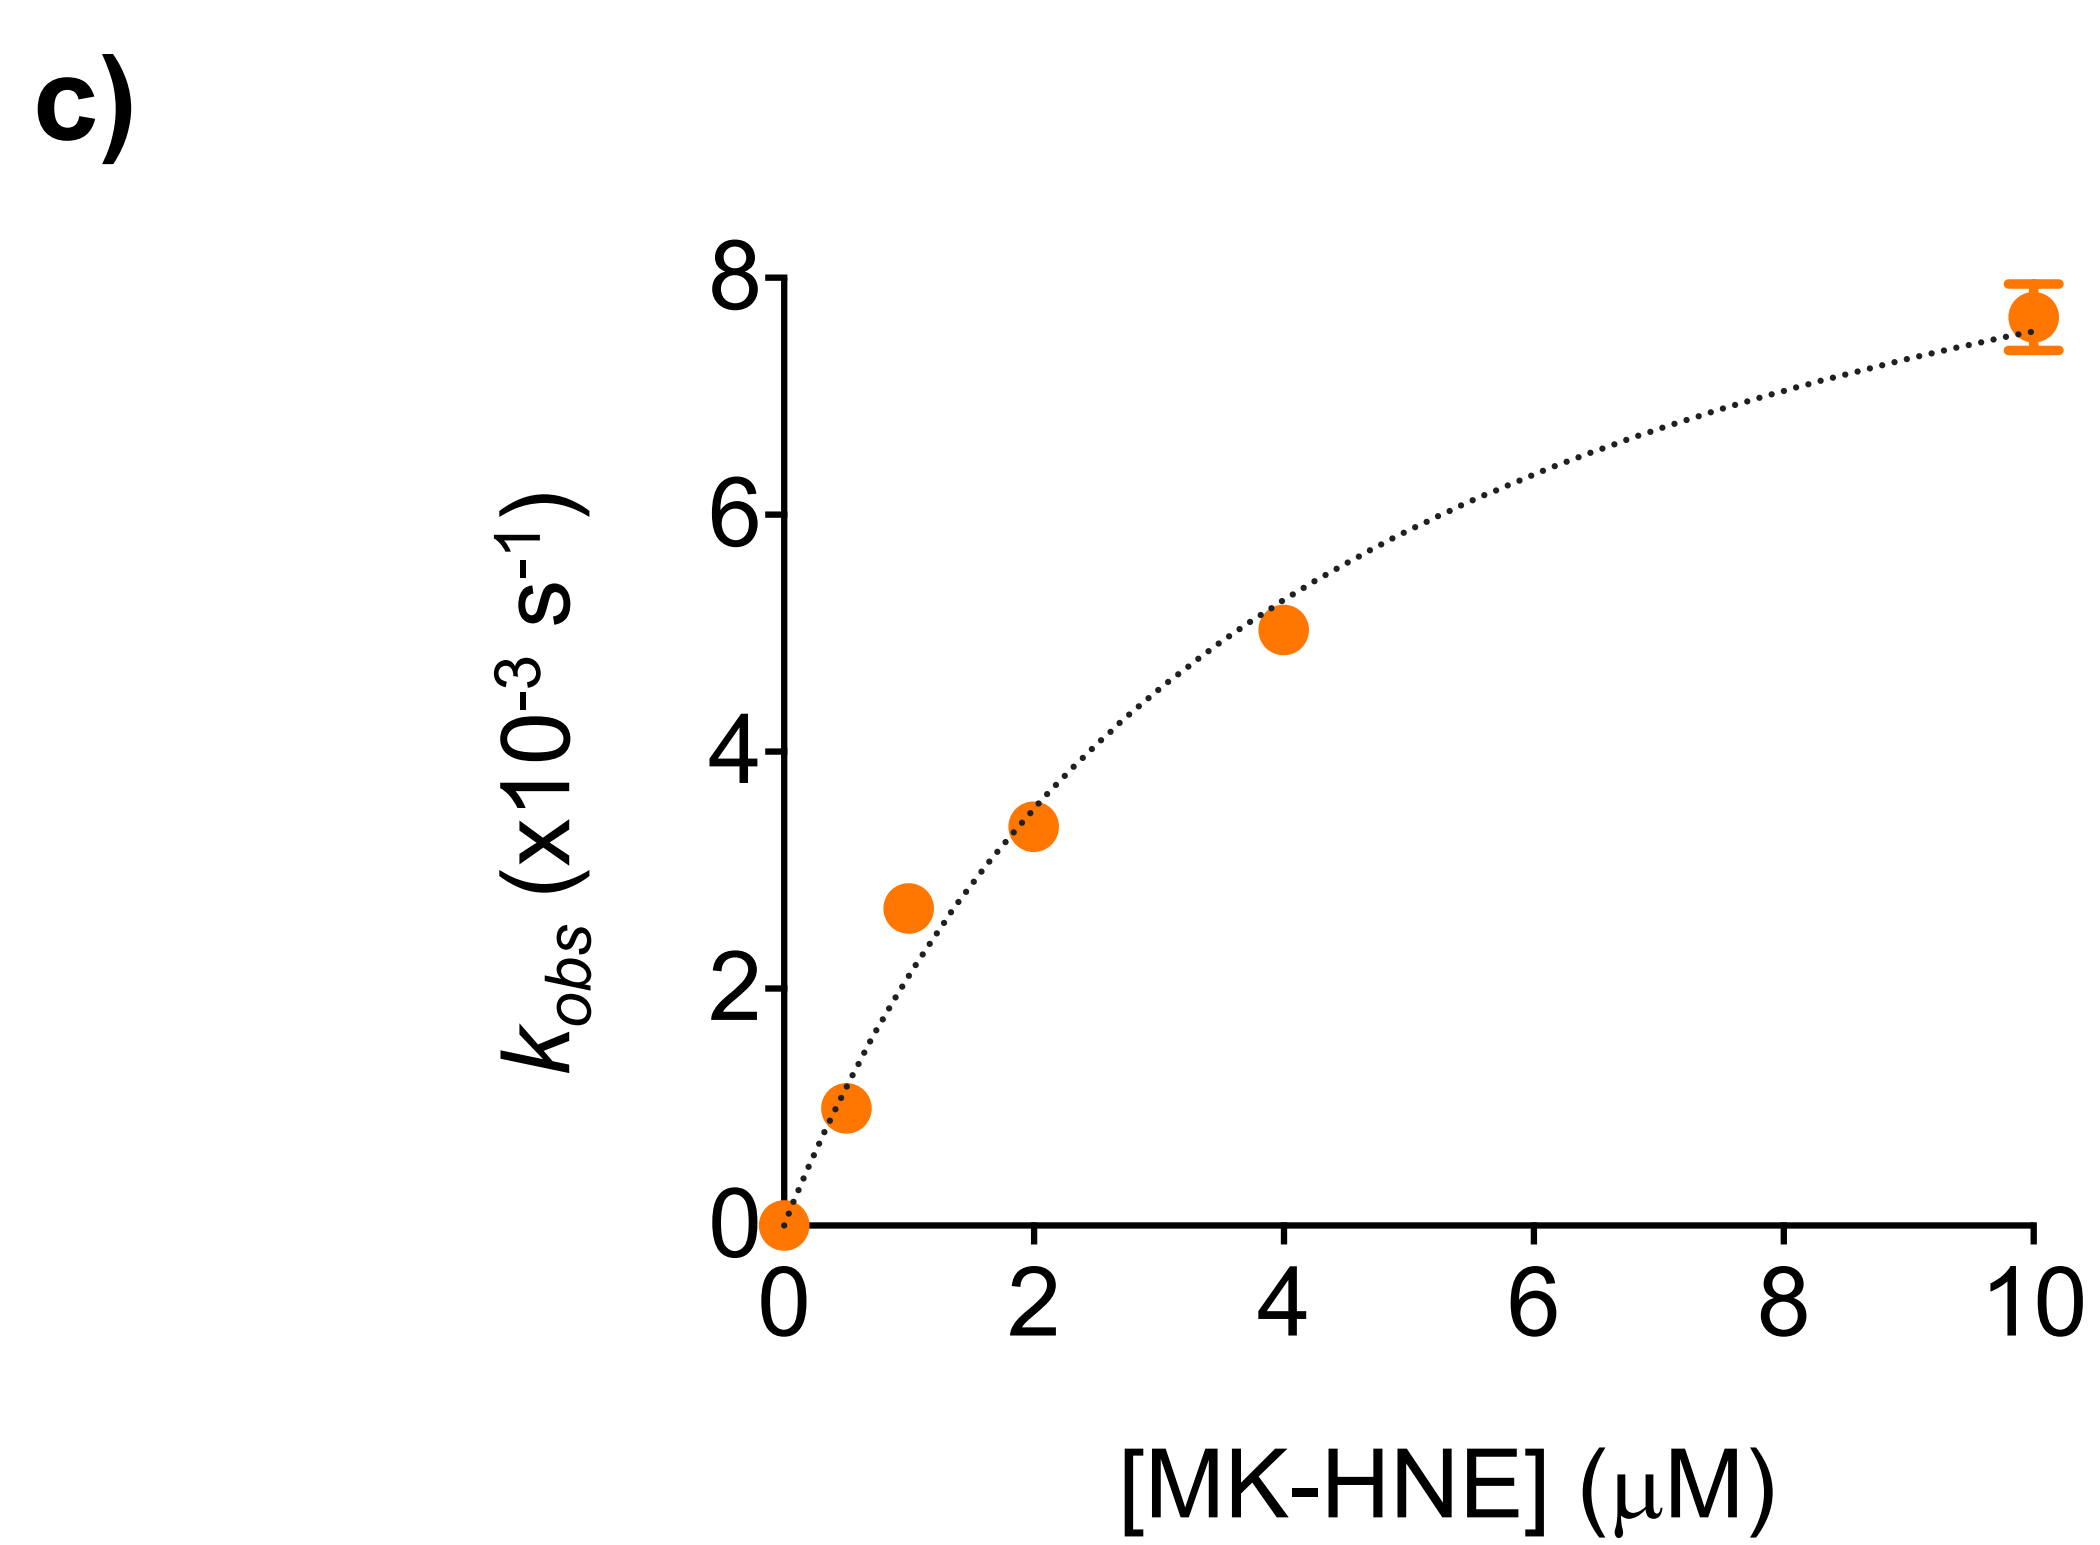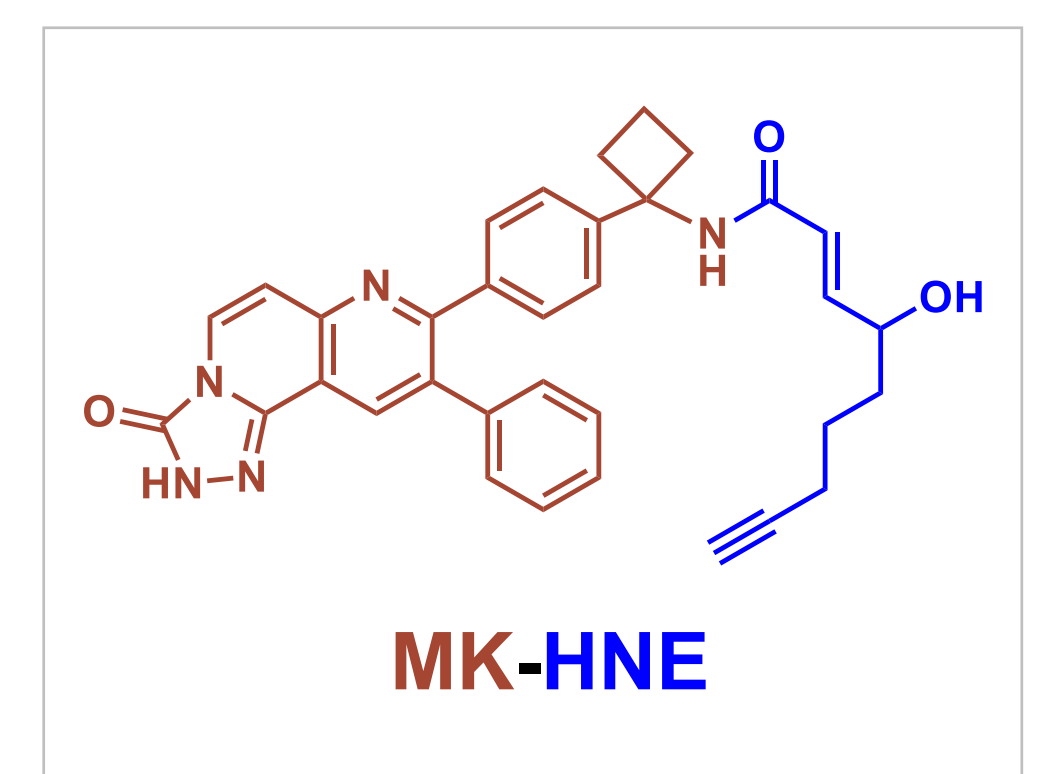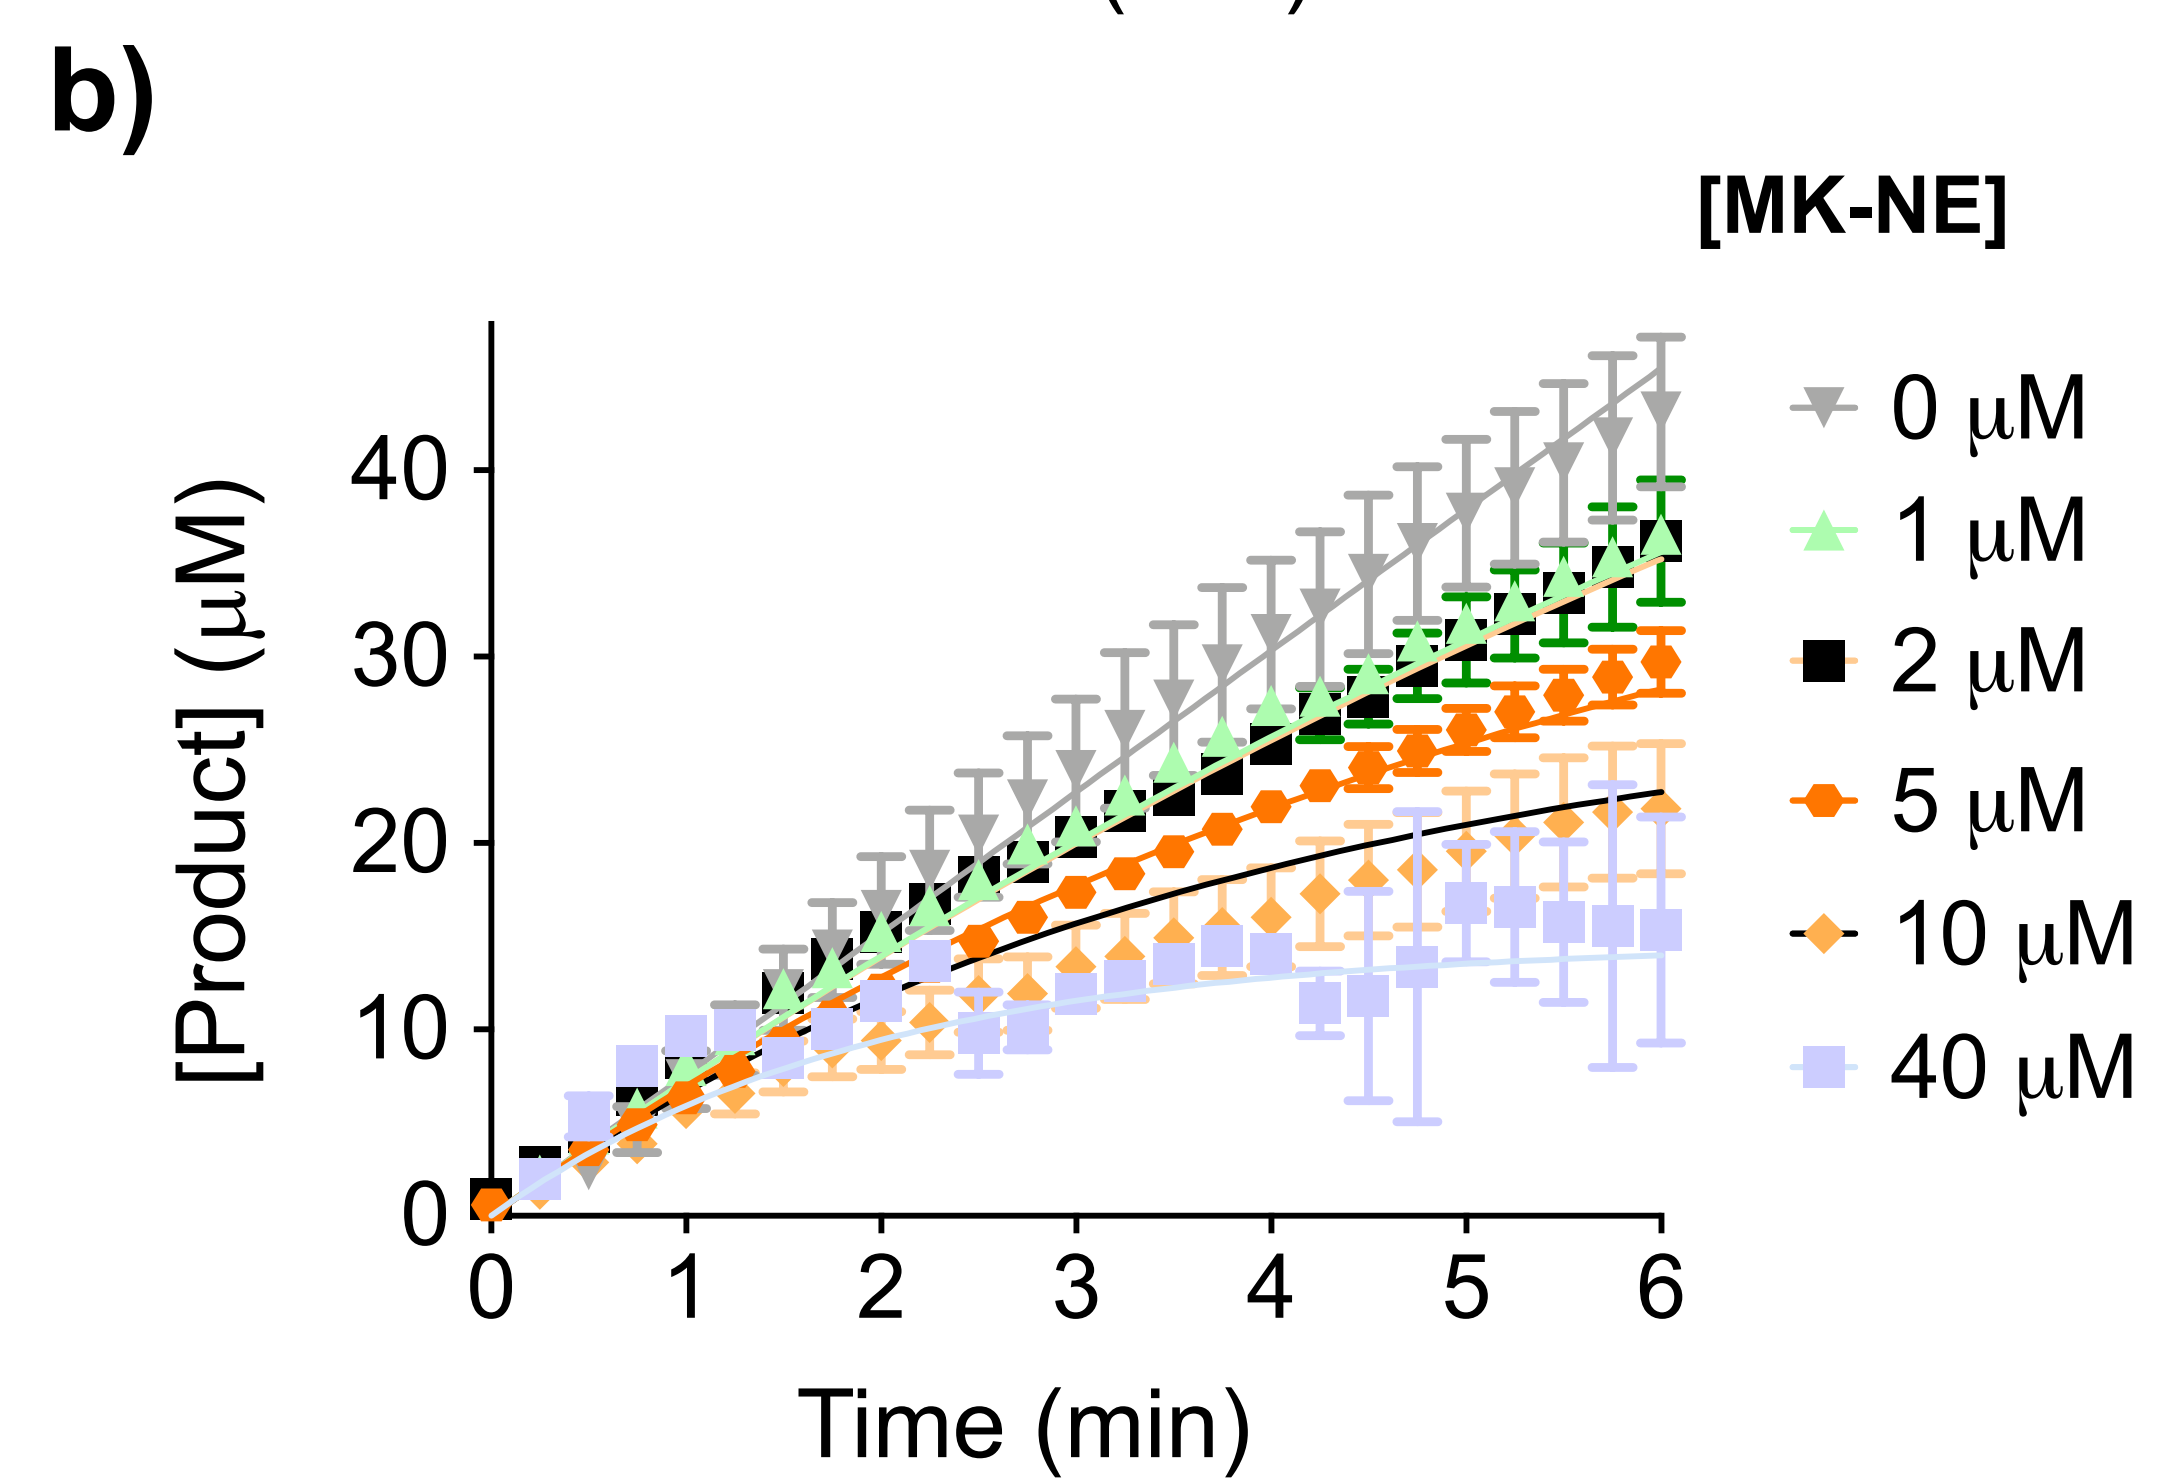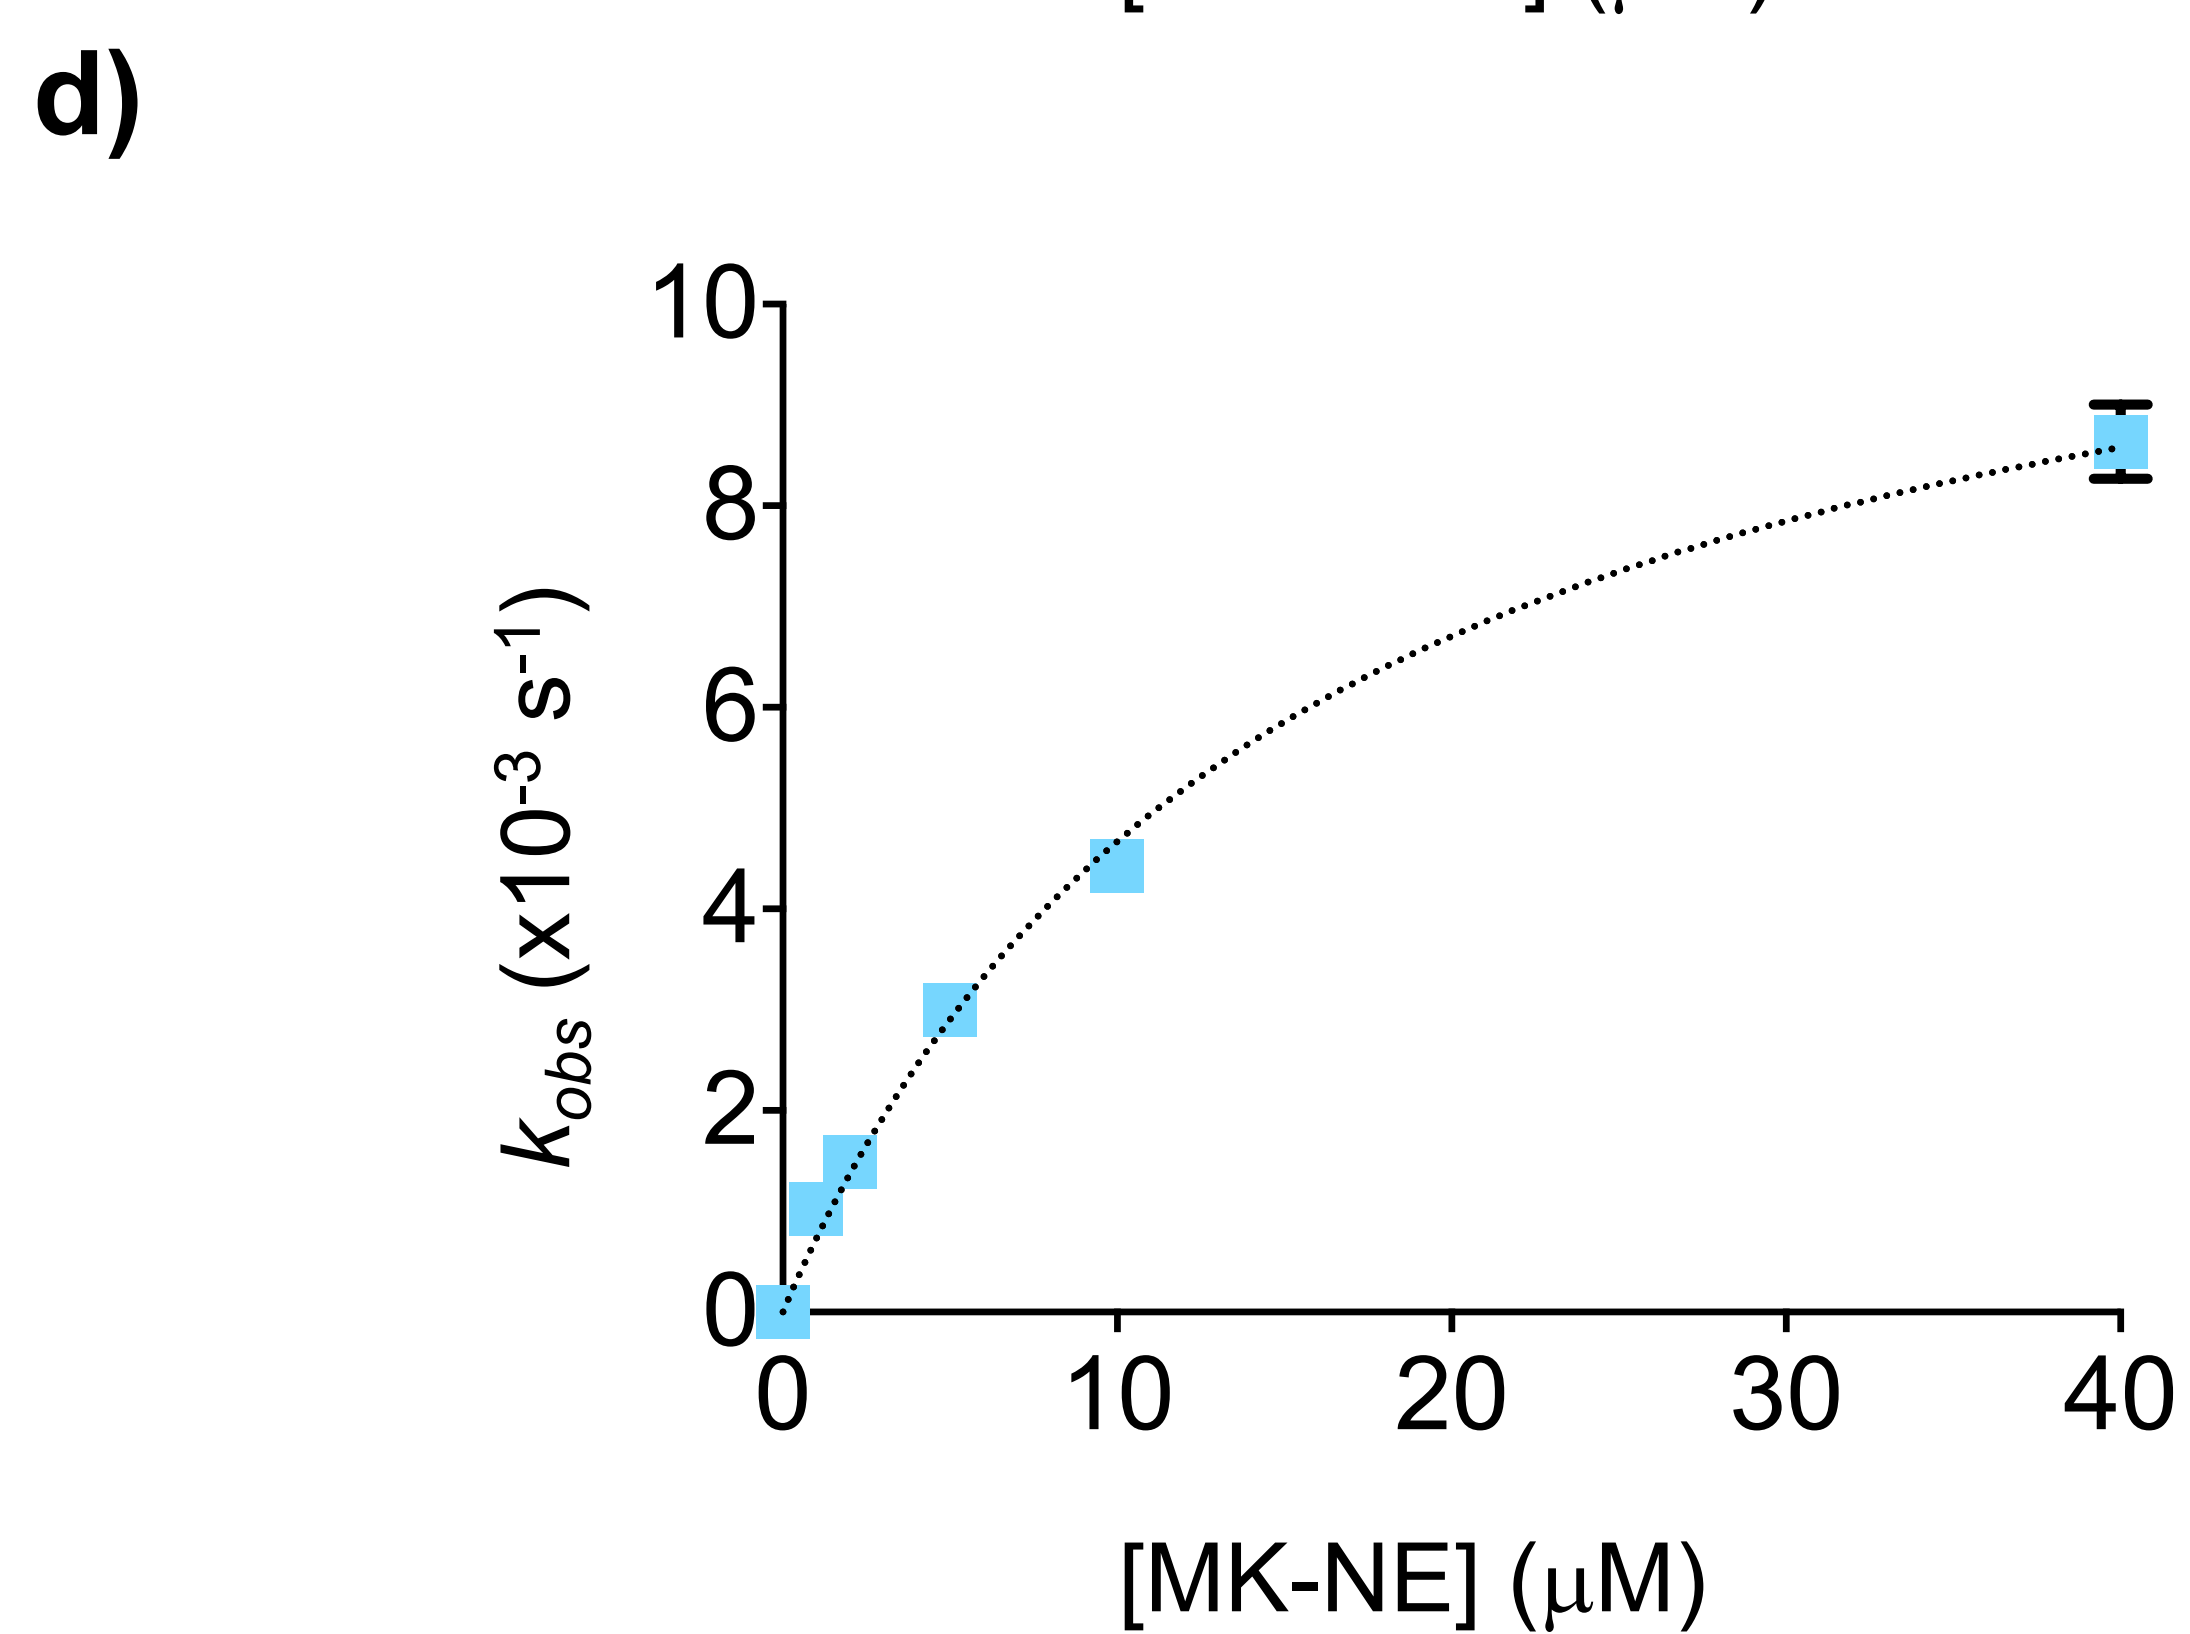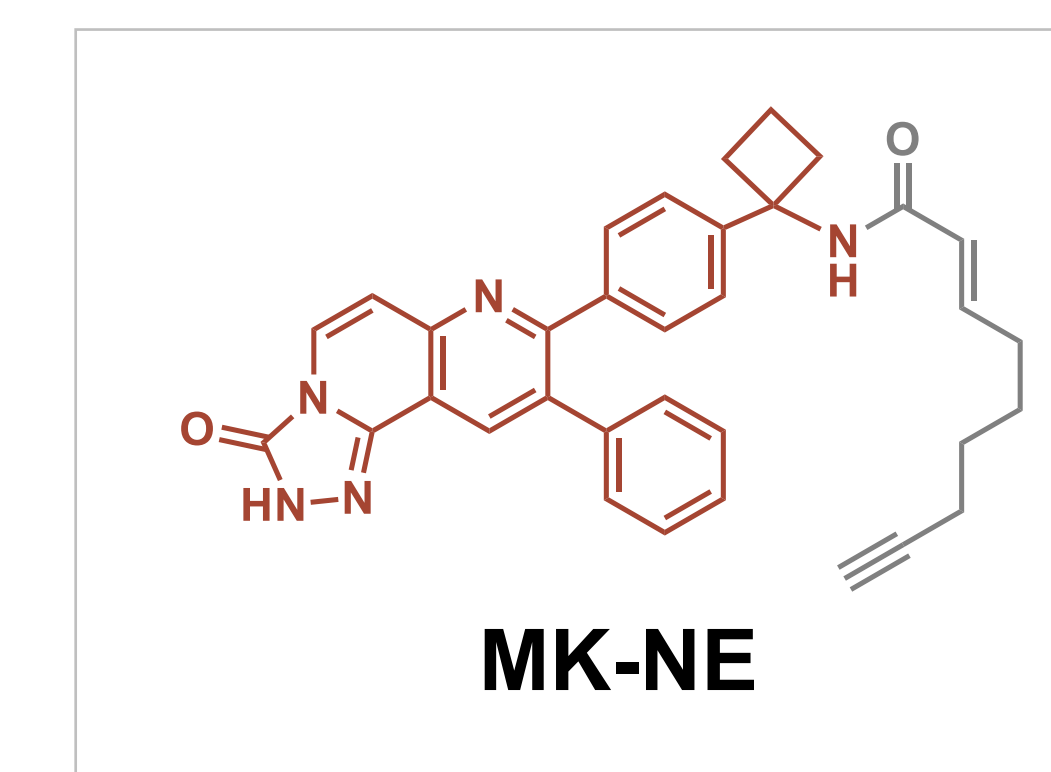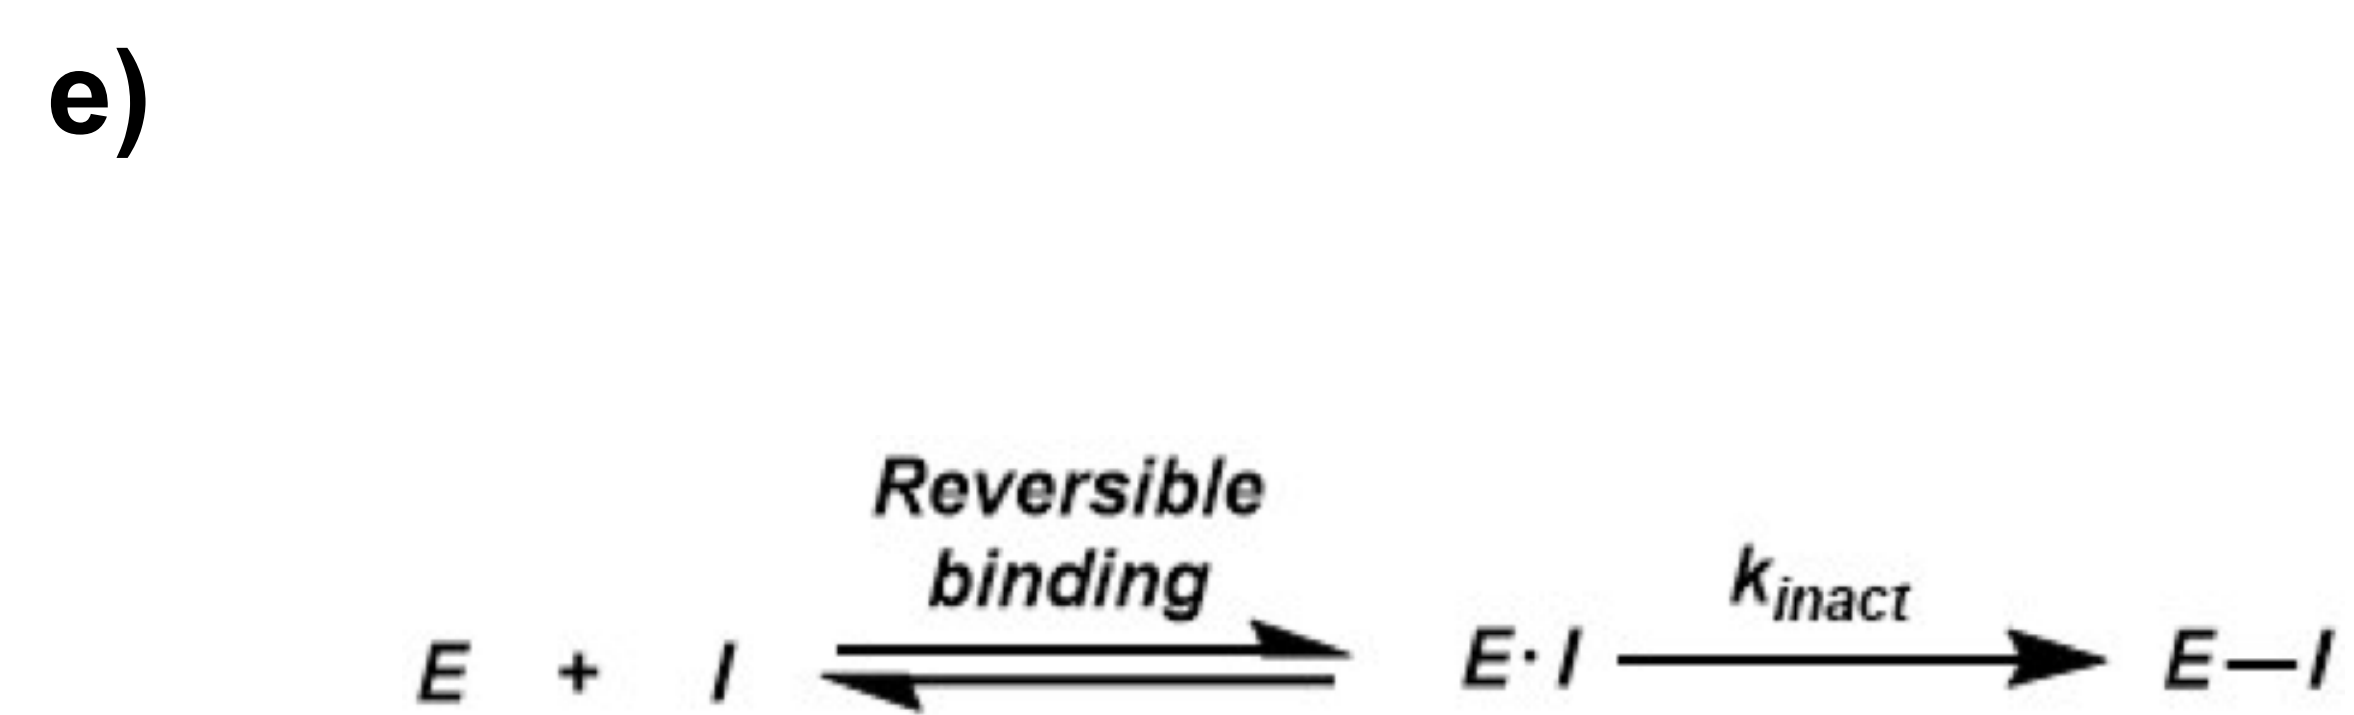

$$(i) [P] = v_s t + \frac{v_i - v_s}{k_{obs} (1 - e^{-k_{obs} t})}$$

$$(ii) K_i^{app} = \frac{[E][I]}{[E \cdot I] + [E - I]} ; k_{obs} = k_{inact} \frac{[I]^n}{(K_i^{app})^n + [I]^n}$$

$$(iii) k_{obs} = k_{inact} \frac{[I]}{K_i^{app} + [I]}$$

[E]: Free enzyme concentration; [I]: Inhibitor concentration; [E·I]: concentration of initial non-covalent enzyme-inhibitor complex; [E–I]: concentration of covalent enzyme-inhibitor complex;  $v_i$ : initial rate of product formation;  $v_s$ : rate of product formation at steady state;  $k_{obs}$ : rate constant for converting the initial active form of the enzyme to the inhibited form at steady state;  $K_i^{app}$ : apparent reversible and covalent binding kinetics between covalent inhibitor and enzyme; n: Hill coefficient for inhibitory cooperativeness of inhibitor upon binding to enzyme.

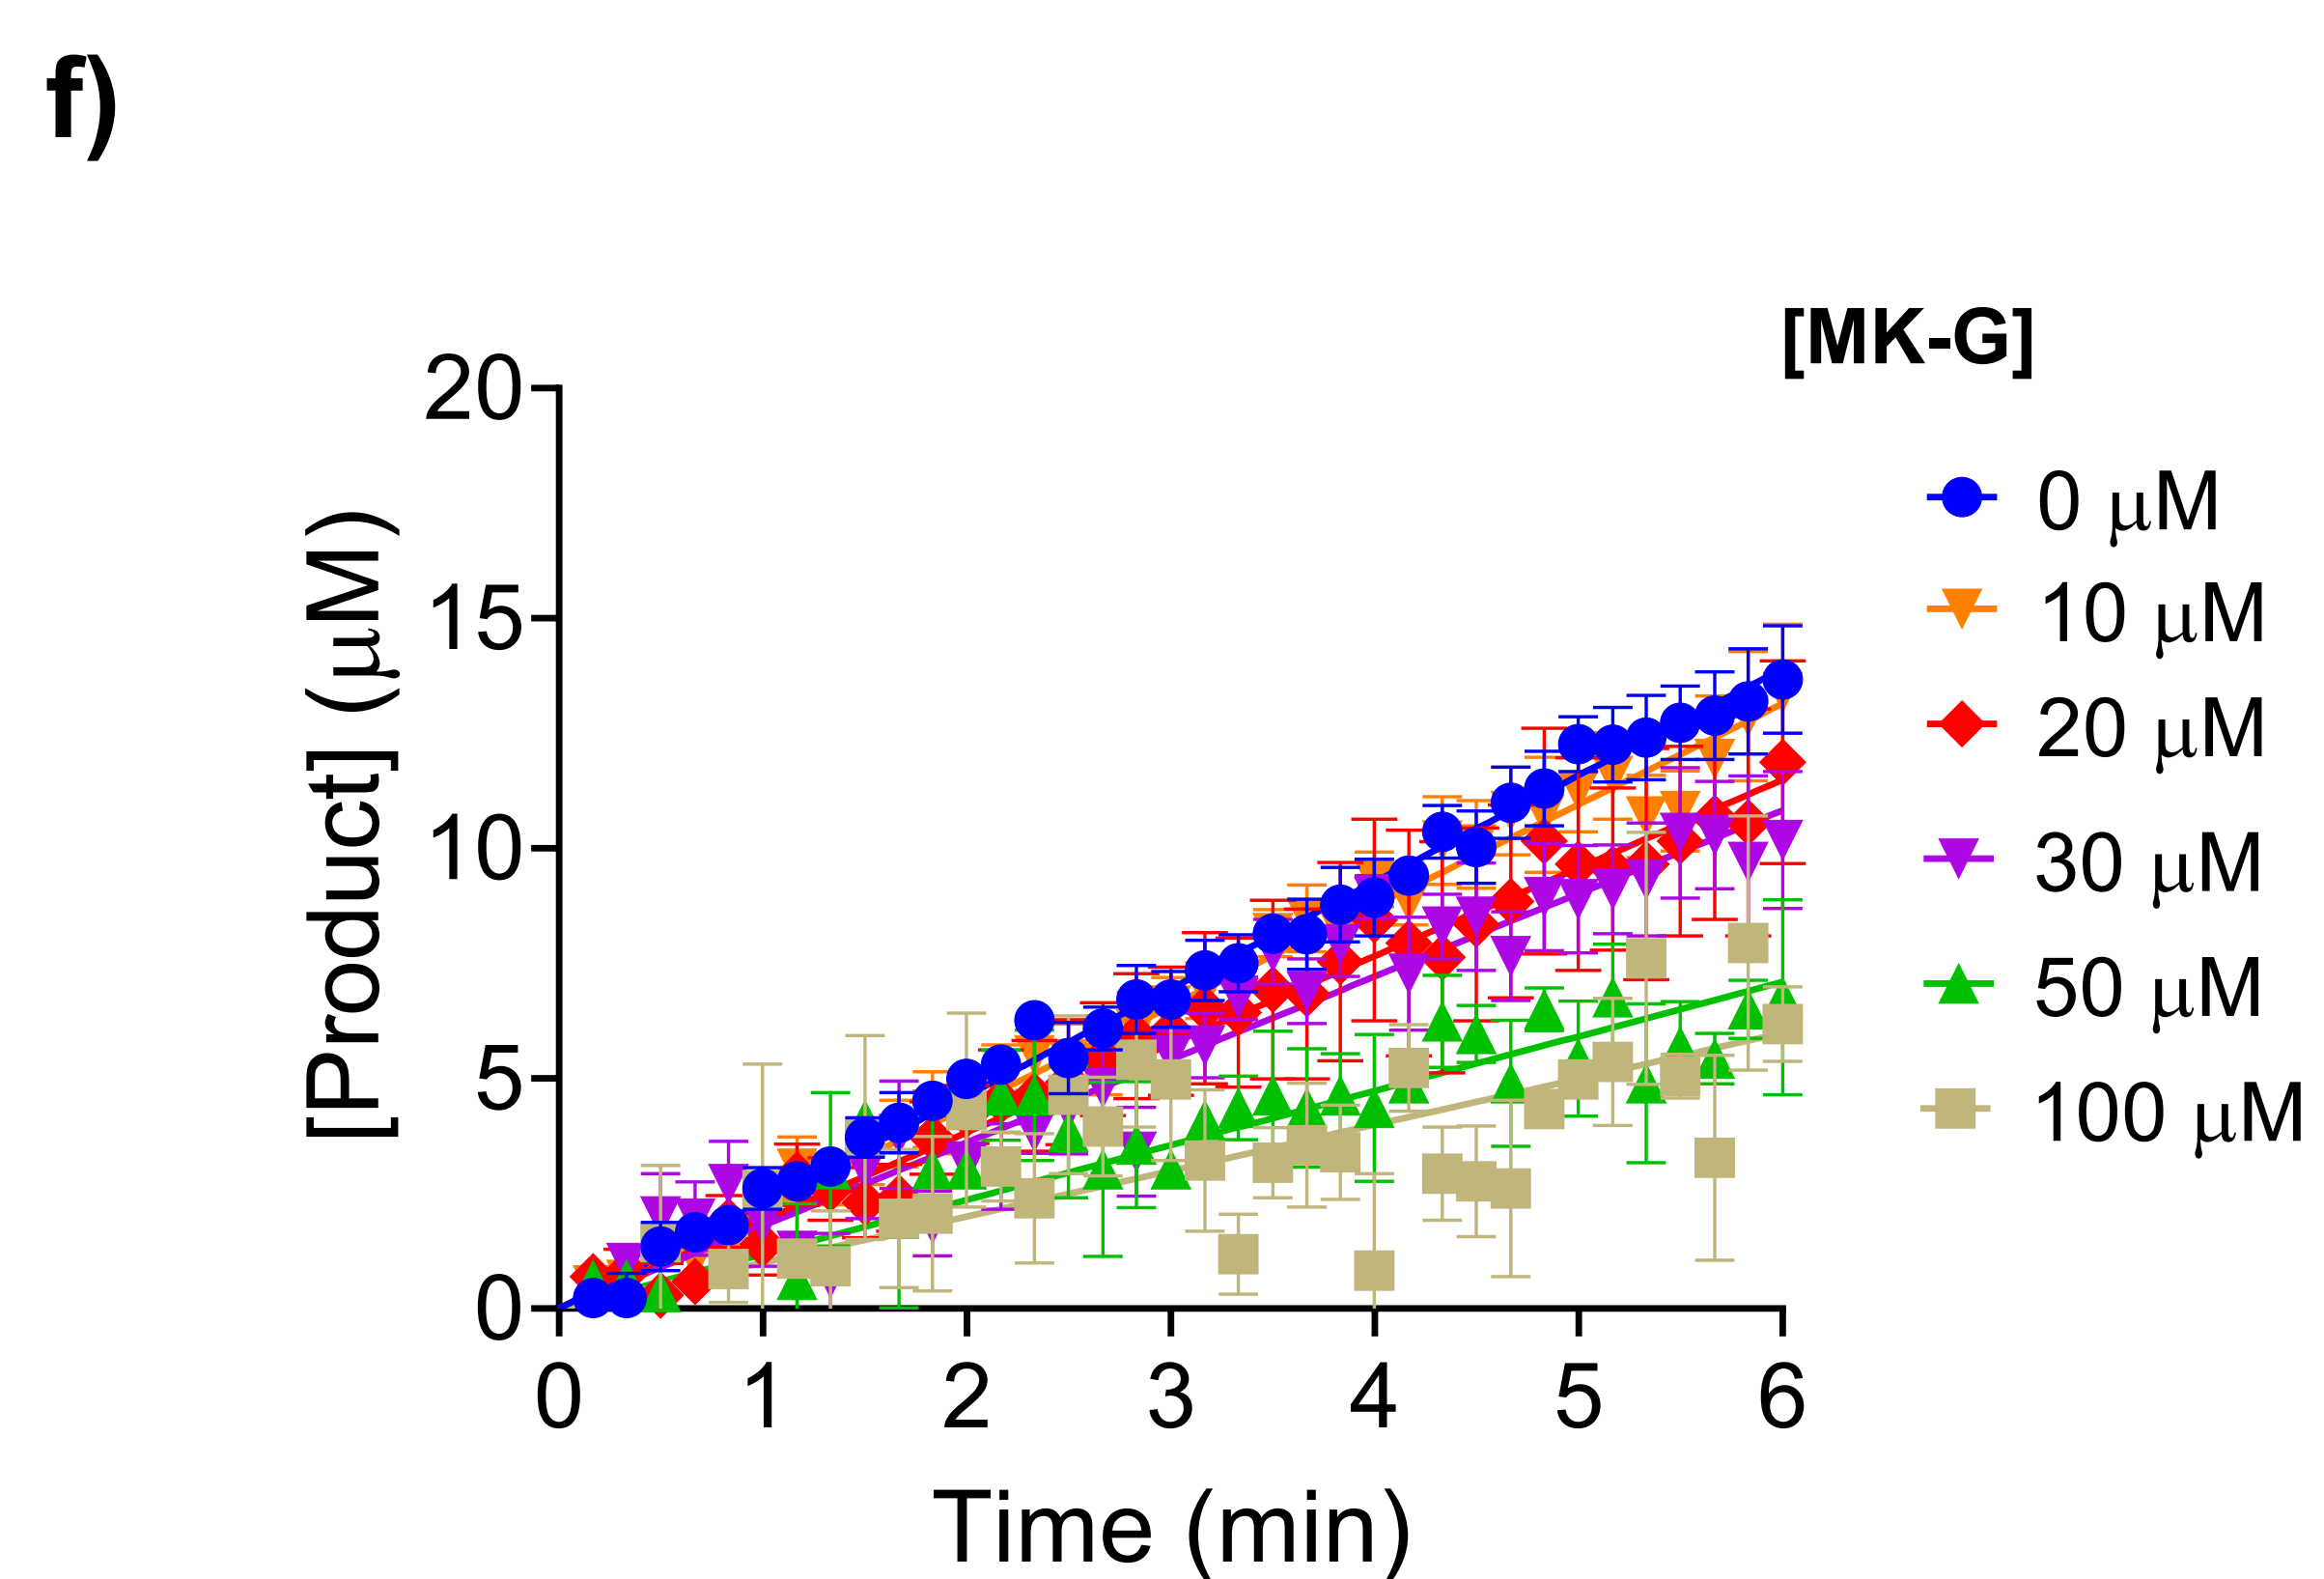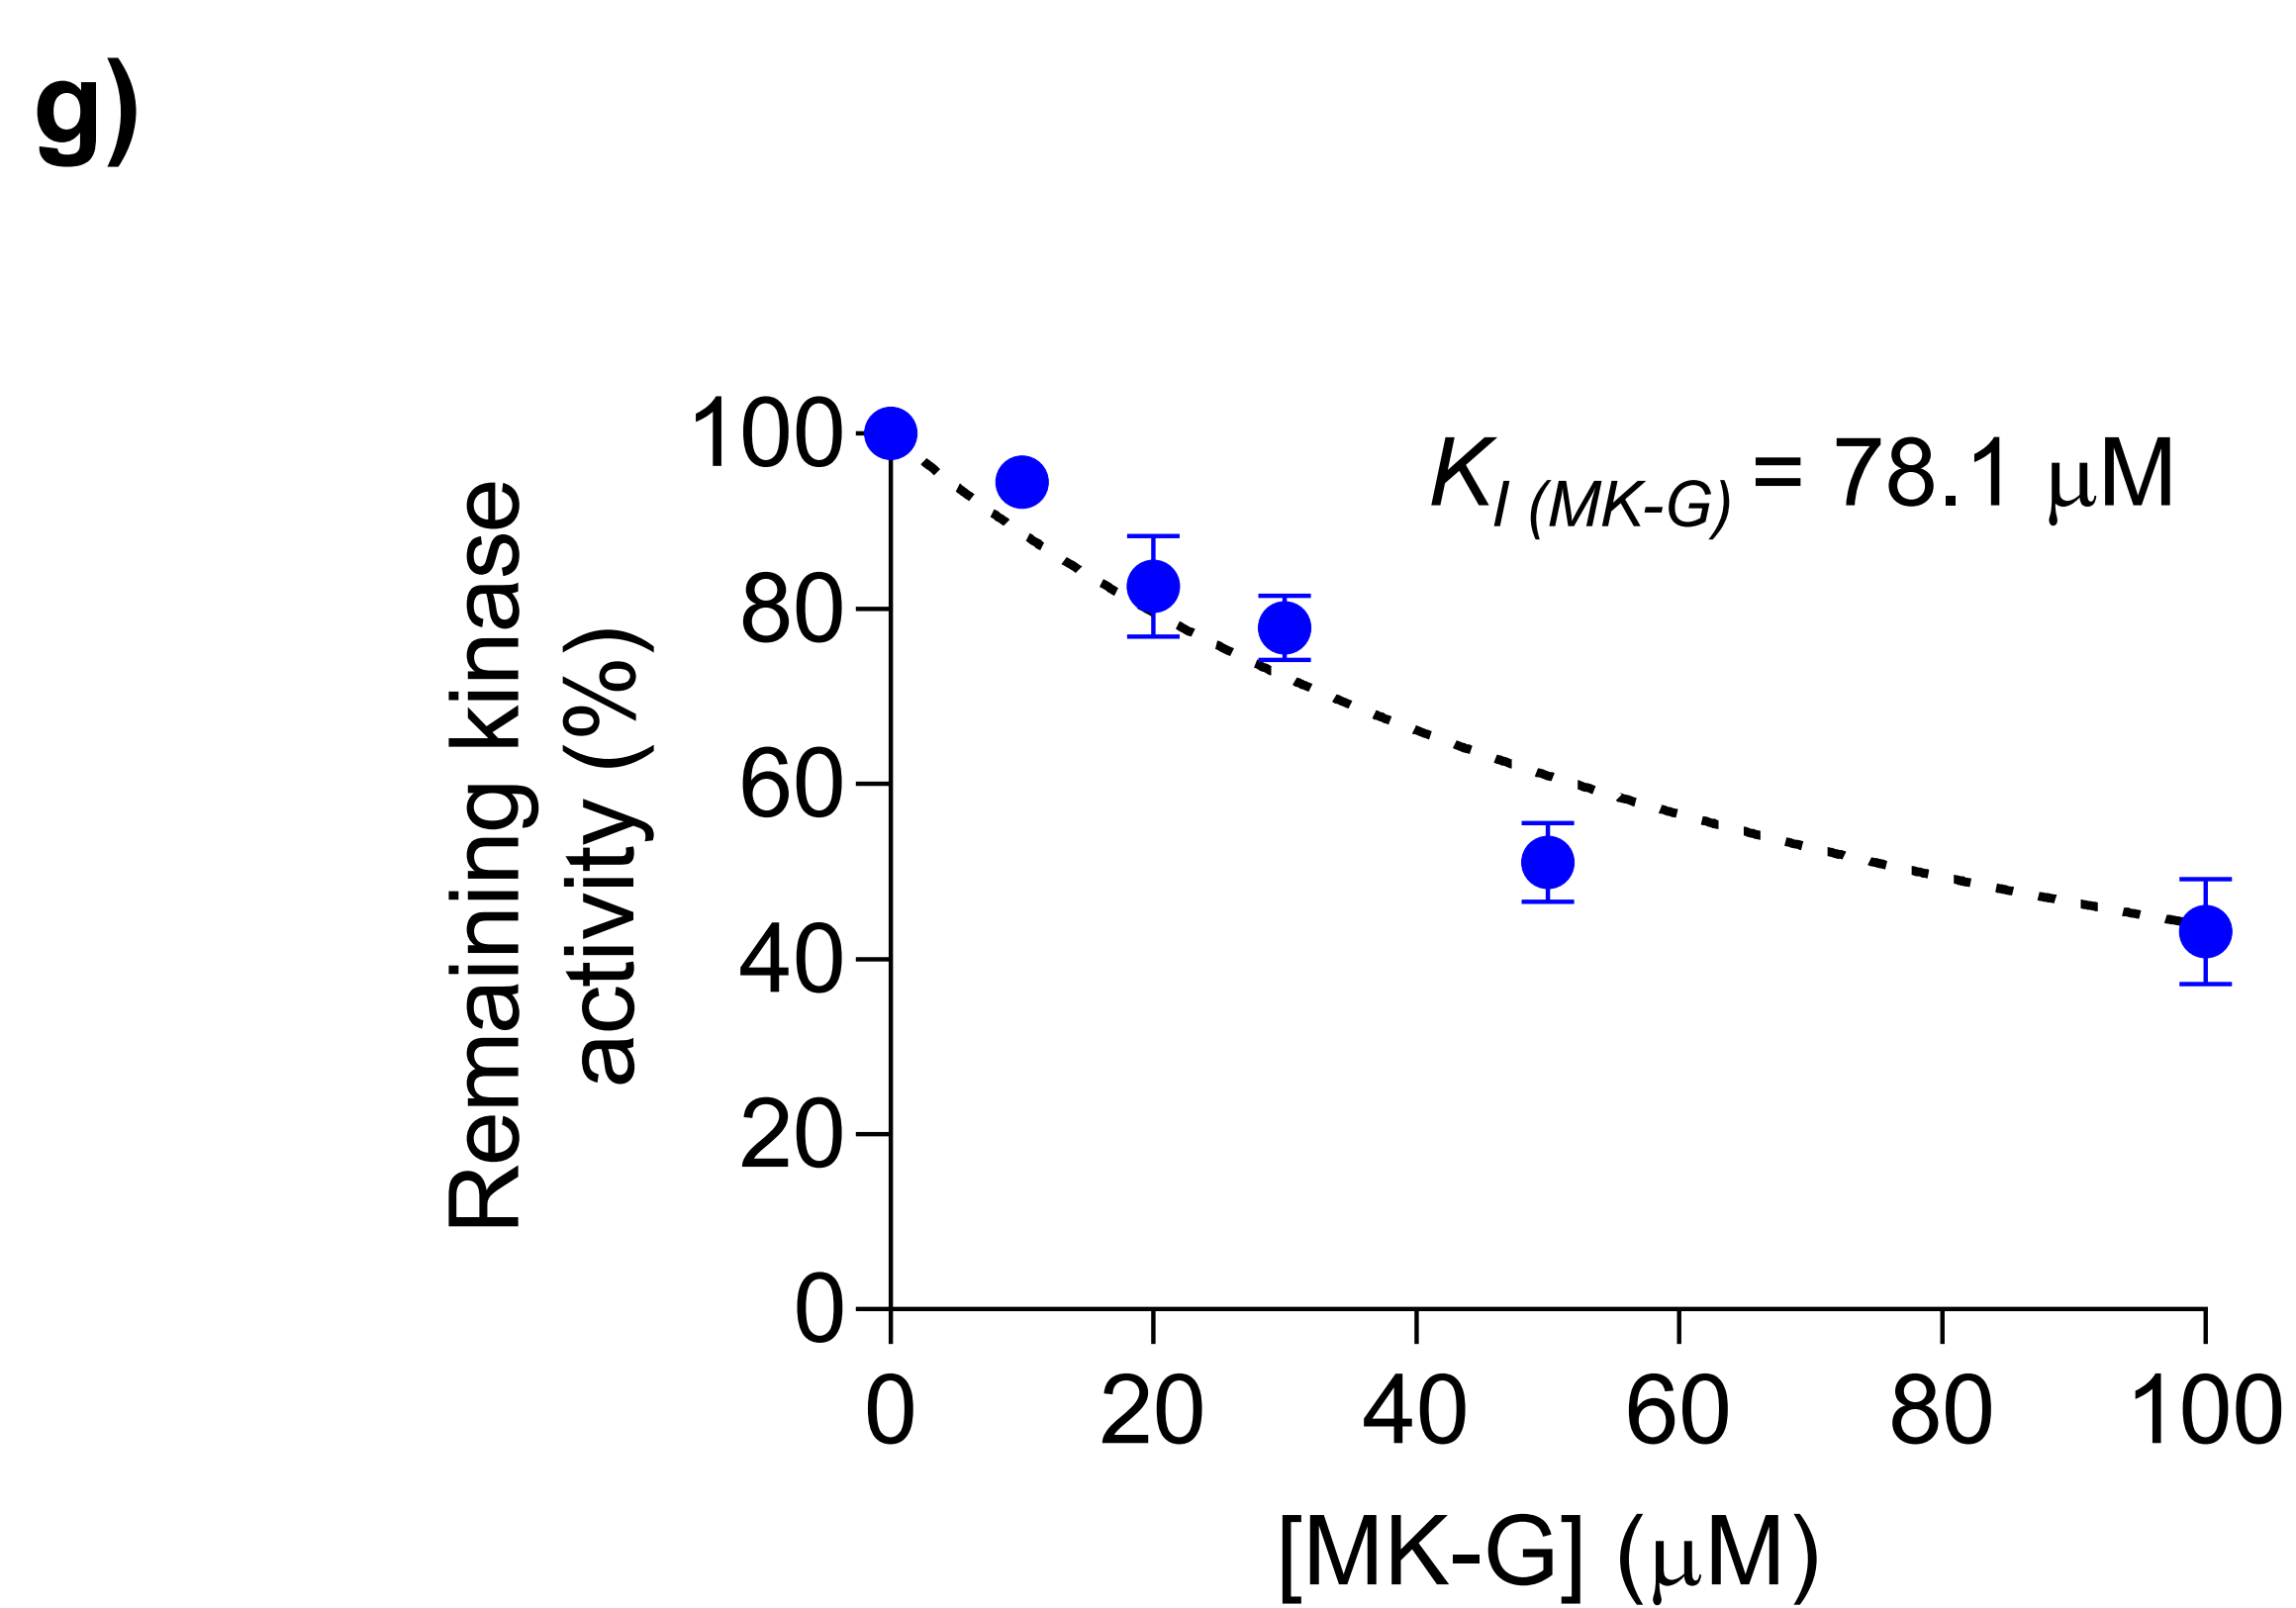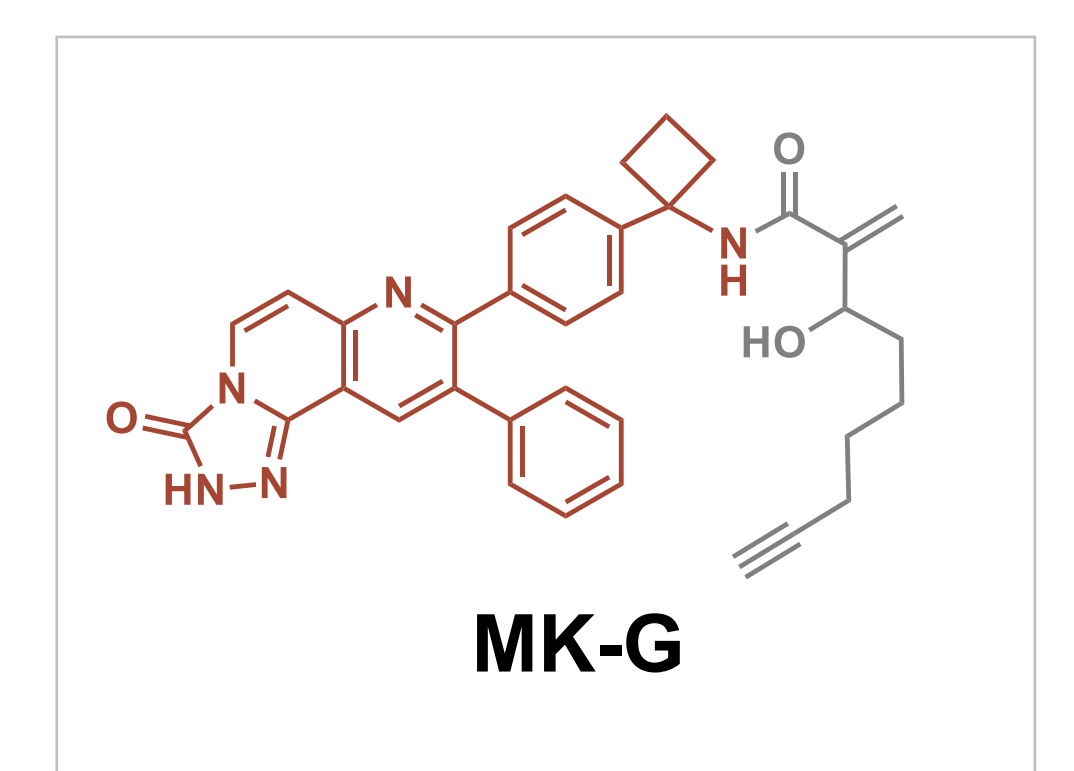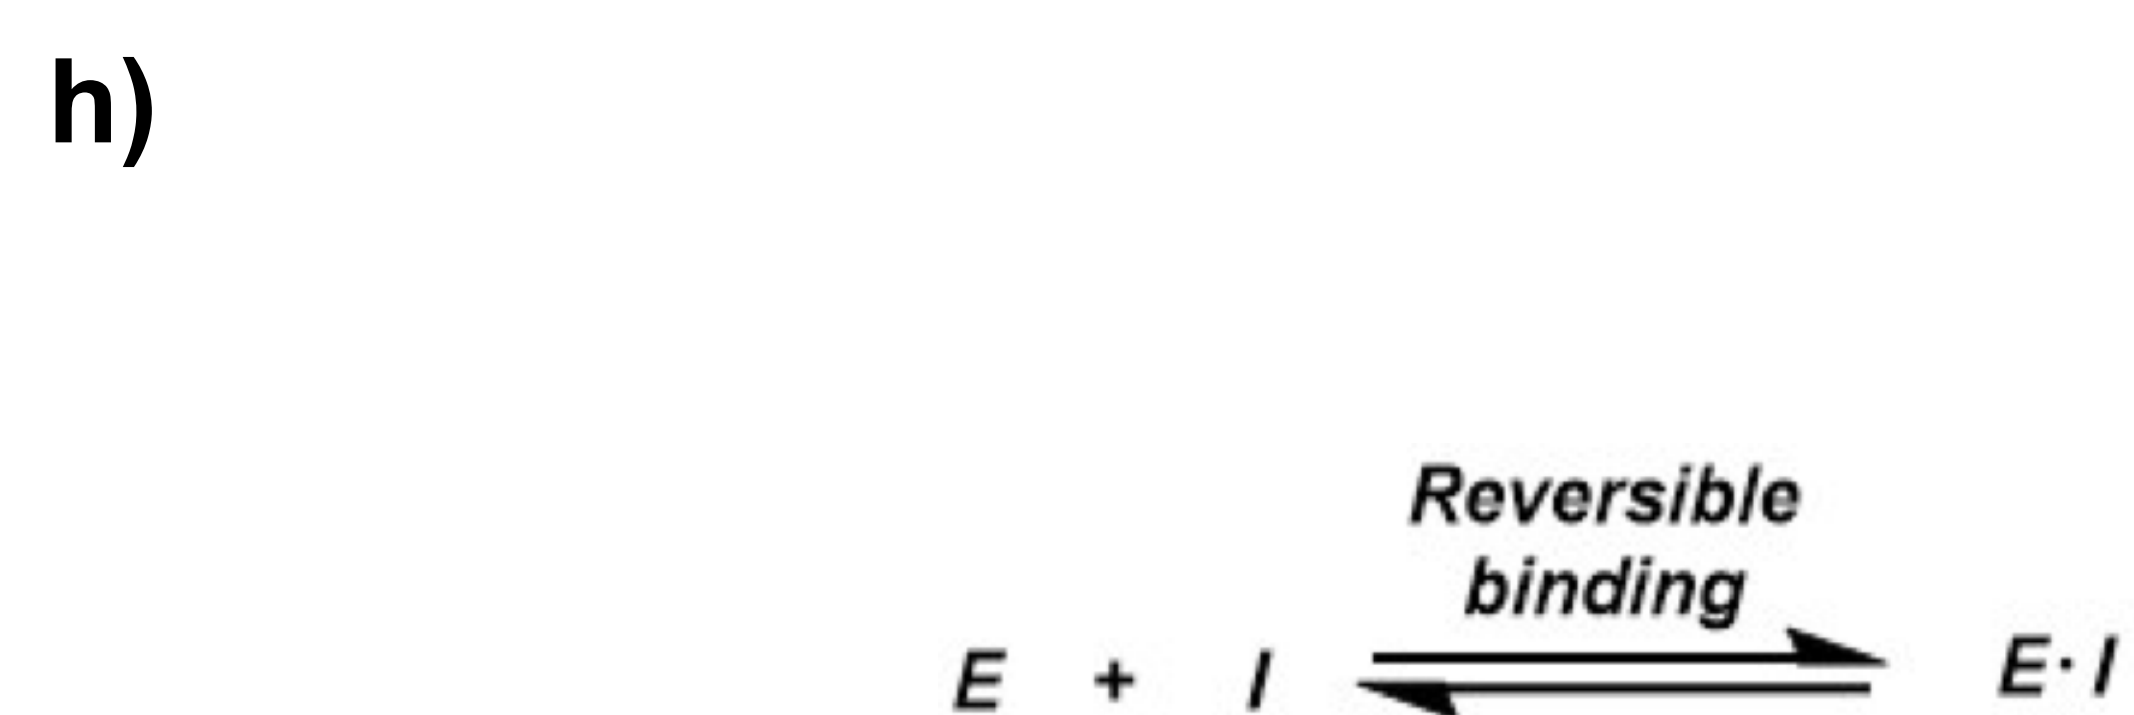

$$(iv) [P] = kt$$

$$(v) \text{ Remaining kinase activity}(\%) = \frac{k_0 - k_i}{k_0} \times 100\%$$

$$(vi) \text{ Remaining kinase activity}(\%) = \frac{1}{1 + \frac{[I]}{K_i}} \times 100\%$$

$k_i$ : rate of product formation at the indicated inhibitor concentration;  $k_0$ : rate of product formation in the absence of inhibitor; [I]: inhibitor concentration;  $K_i$ : inhibitor constant



Figure S8

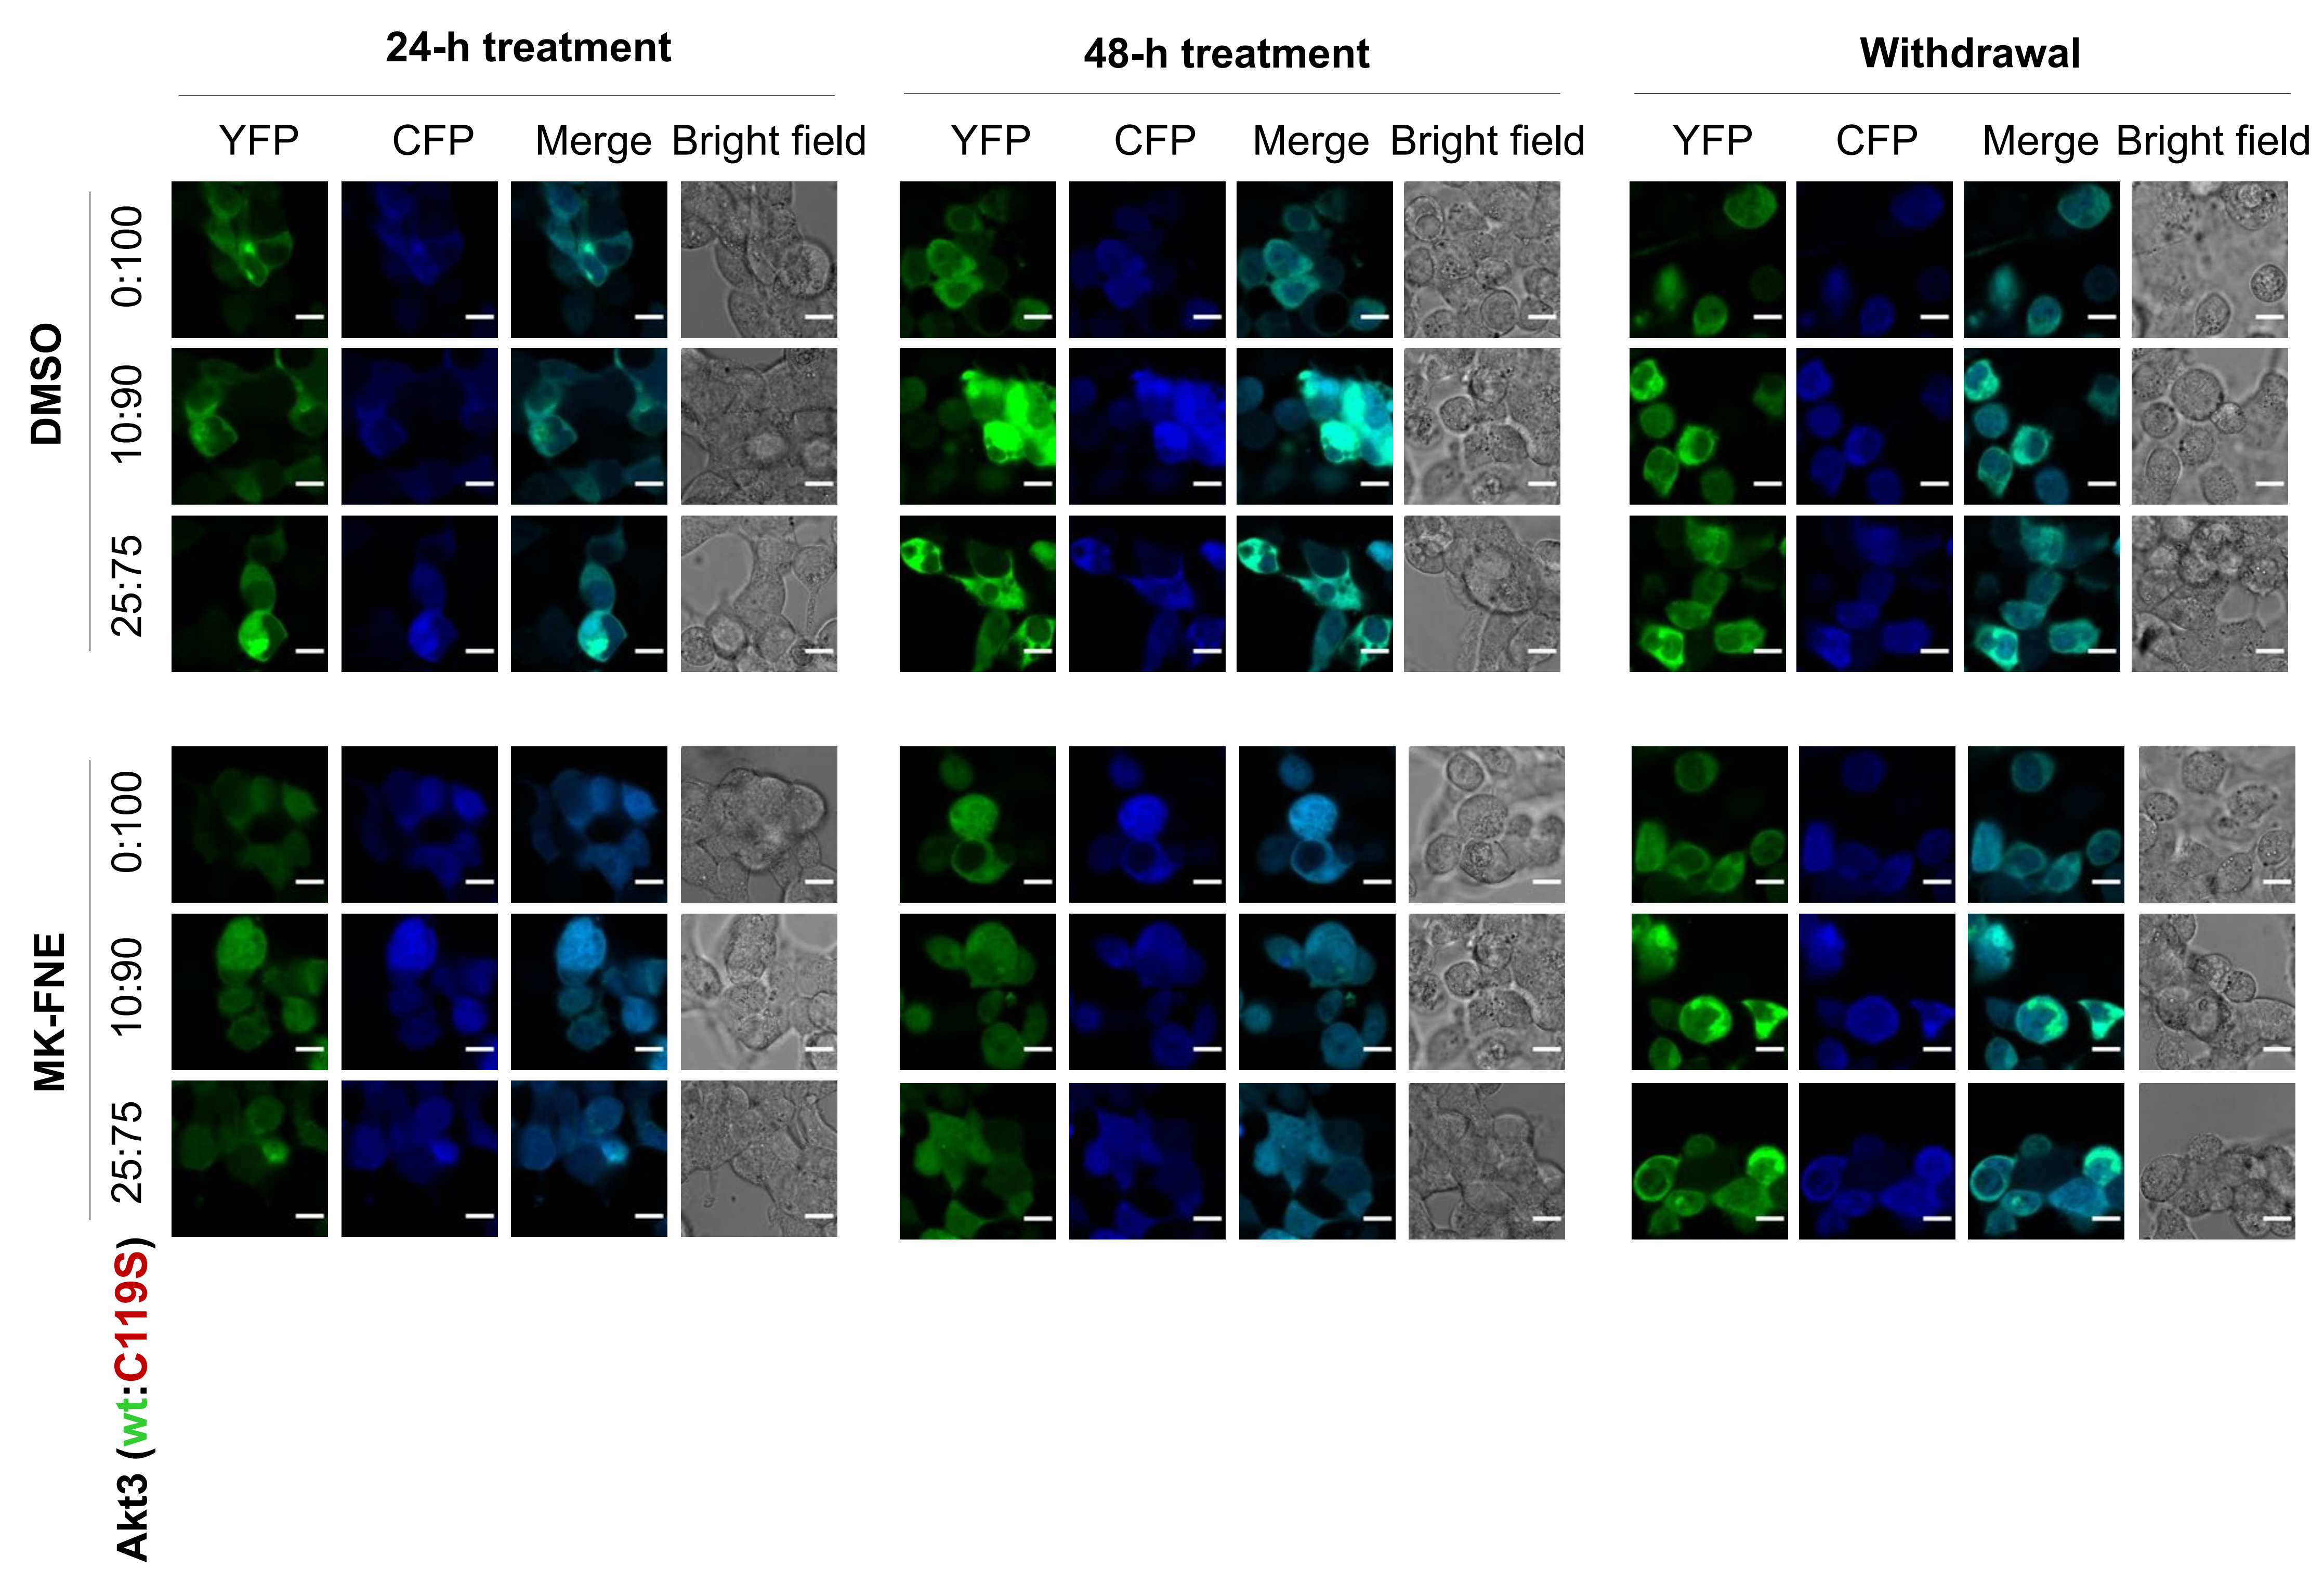

Relative FRET  
emission ratio  
for the  
indicated  
plasmid  
mixture

$$= \frac{\text{YFP/CFP}_{\text{MK-FNE withdrawal}}}{\langle \text{YFP/CFP} \rangle_{\text{DMSO withdrawal}}}$$

Figure S9

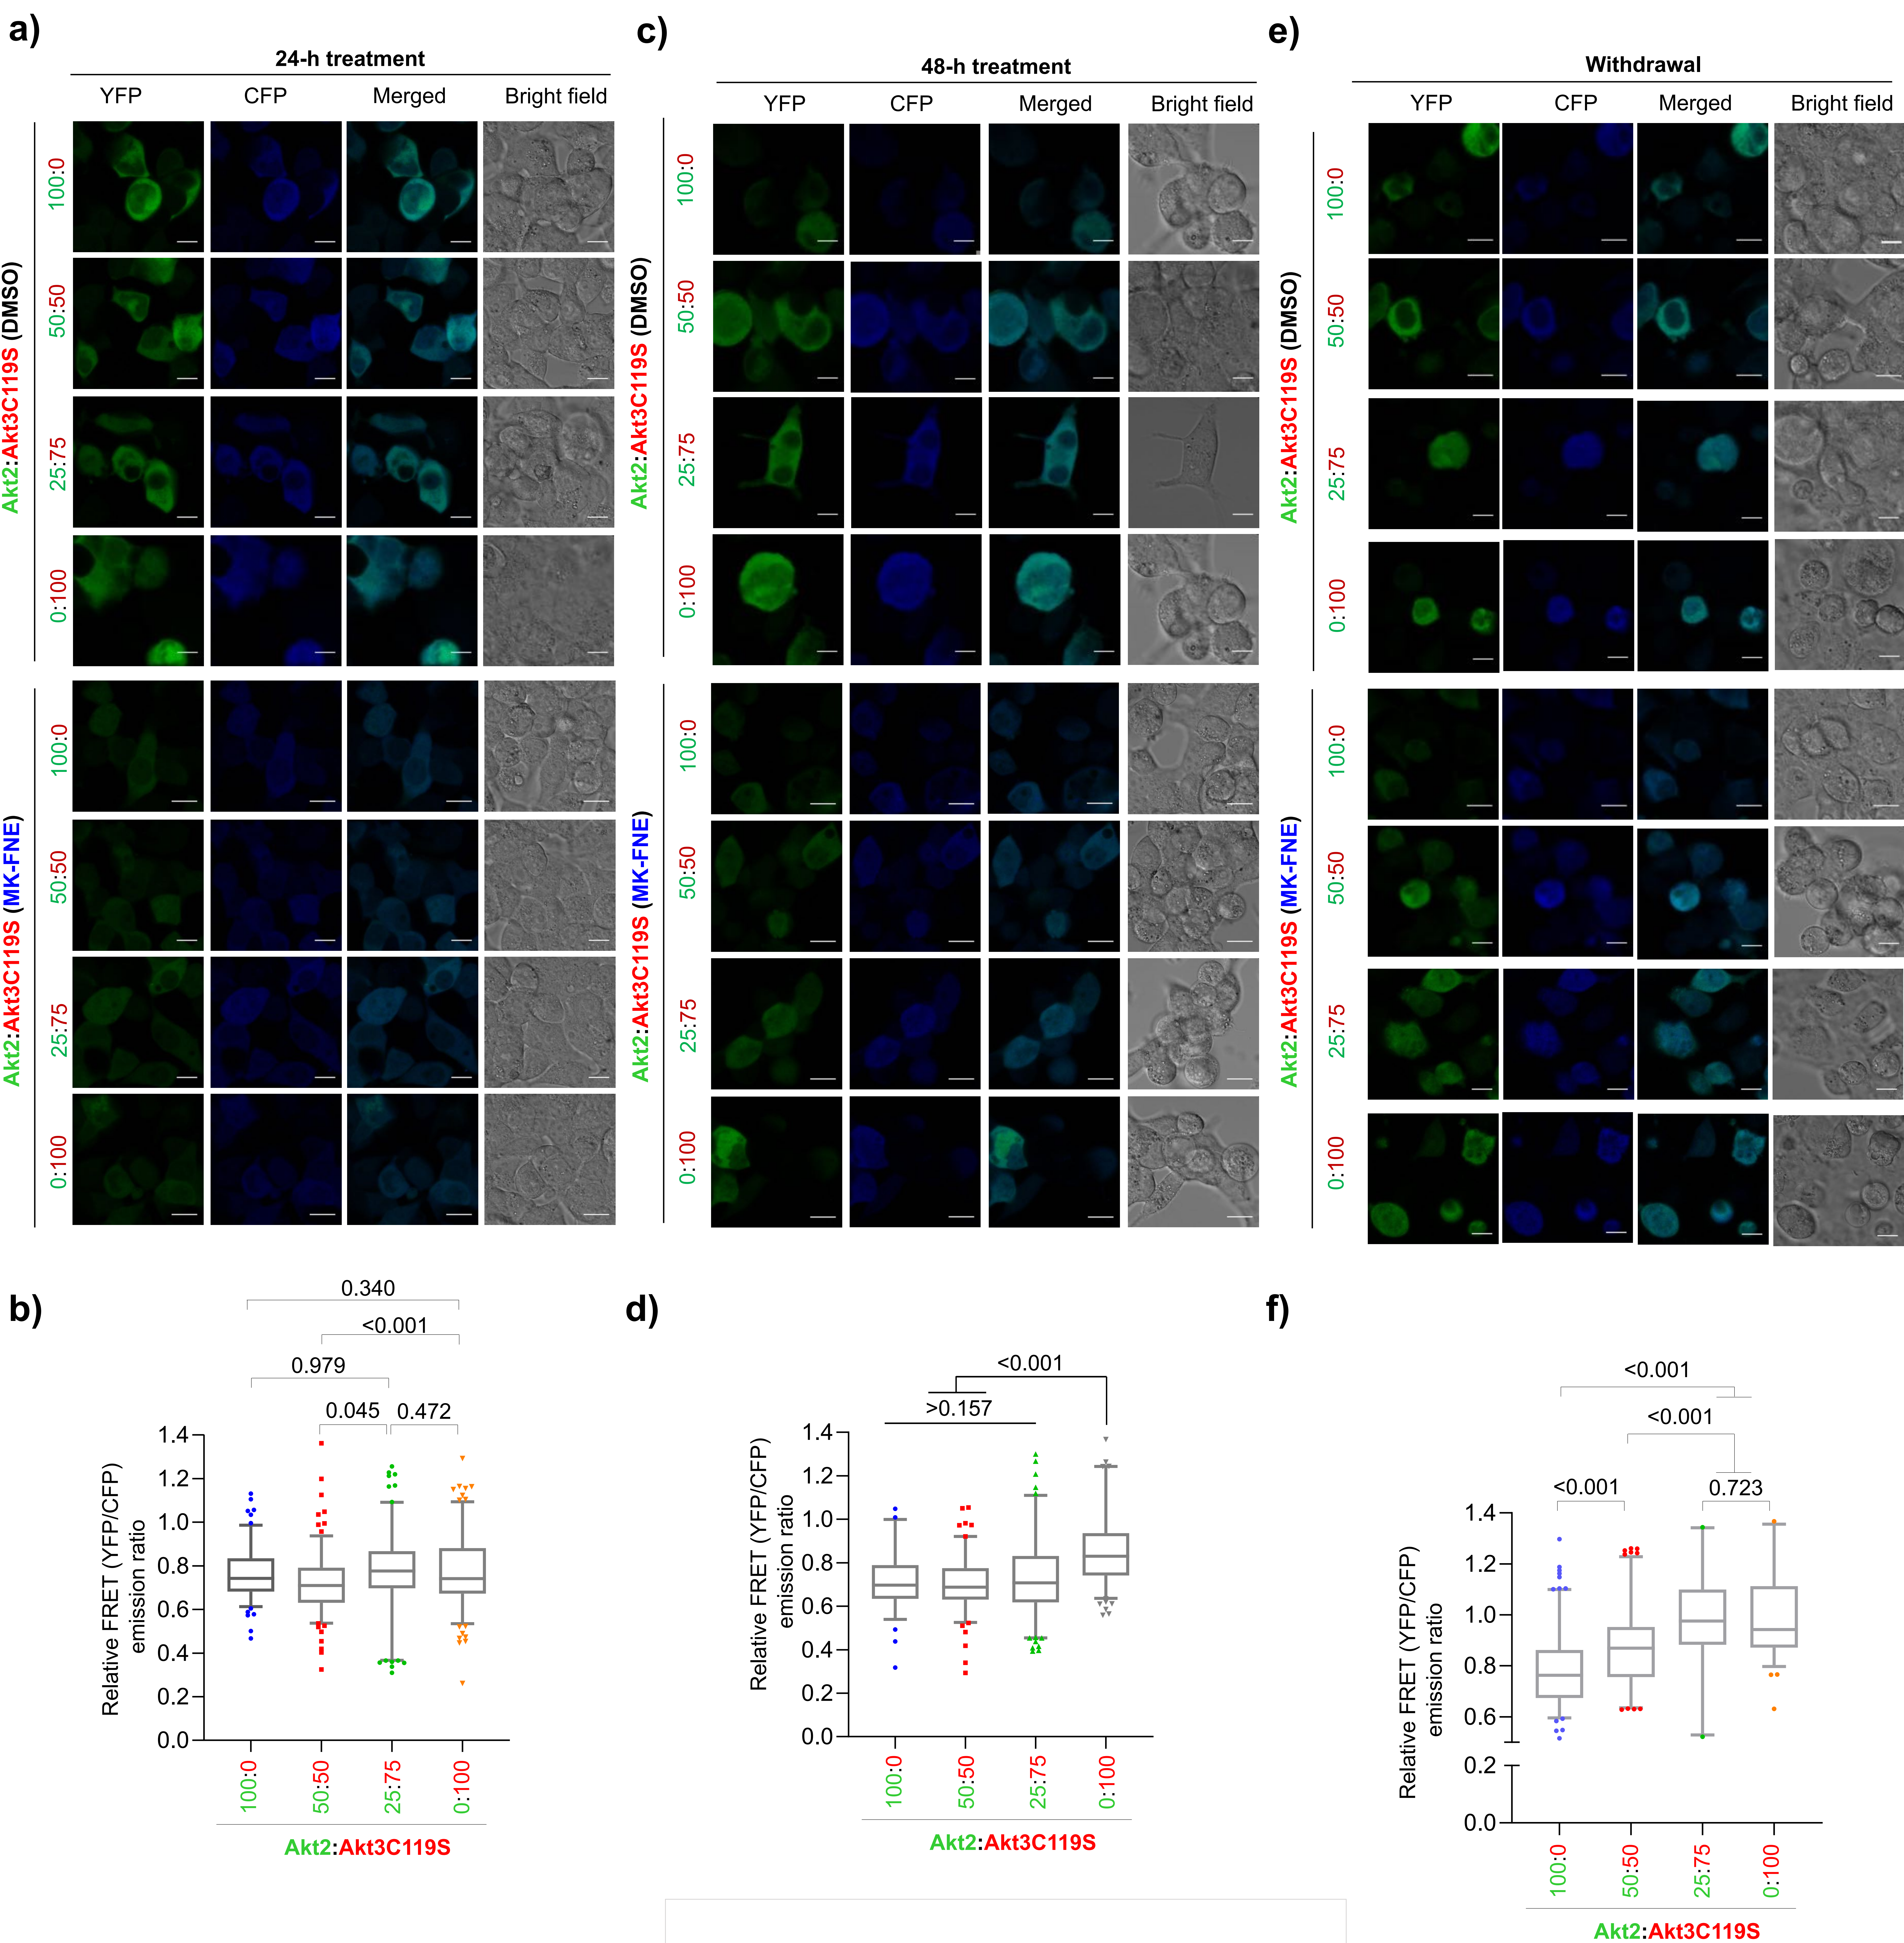

Relative FRET emission ratio =  $\text{YFP/CFP}_{\text{MK-FNE}} / \langle \text{YFP/CFP} \rangle_{\text{DMSO}}$   
for the stated plasmid mixture

**Figure S10**

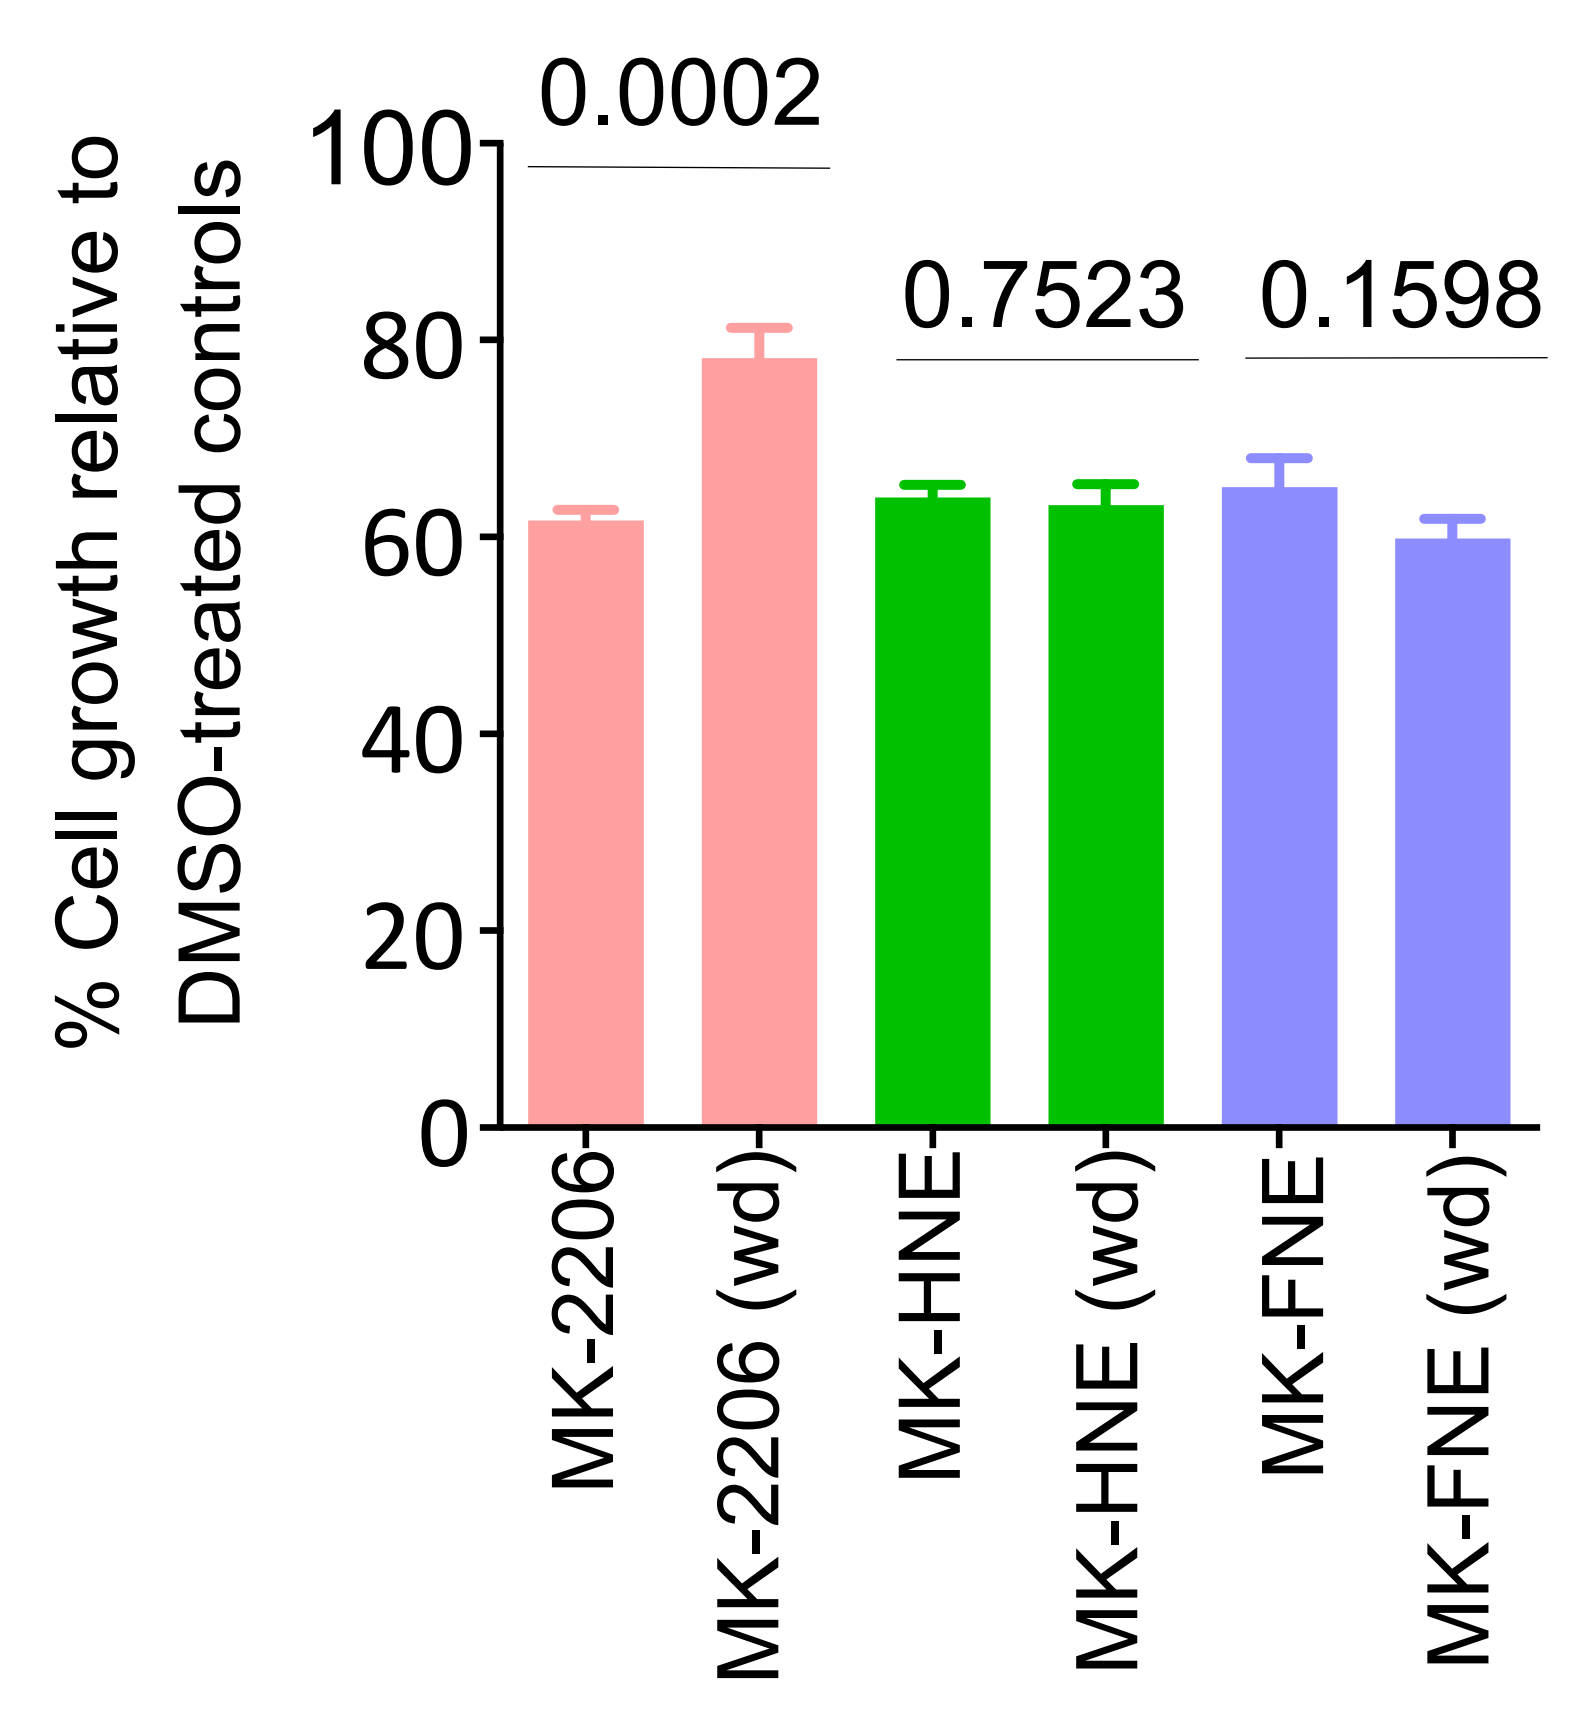

Figure S11

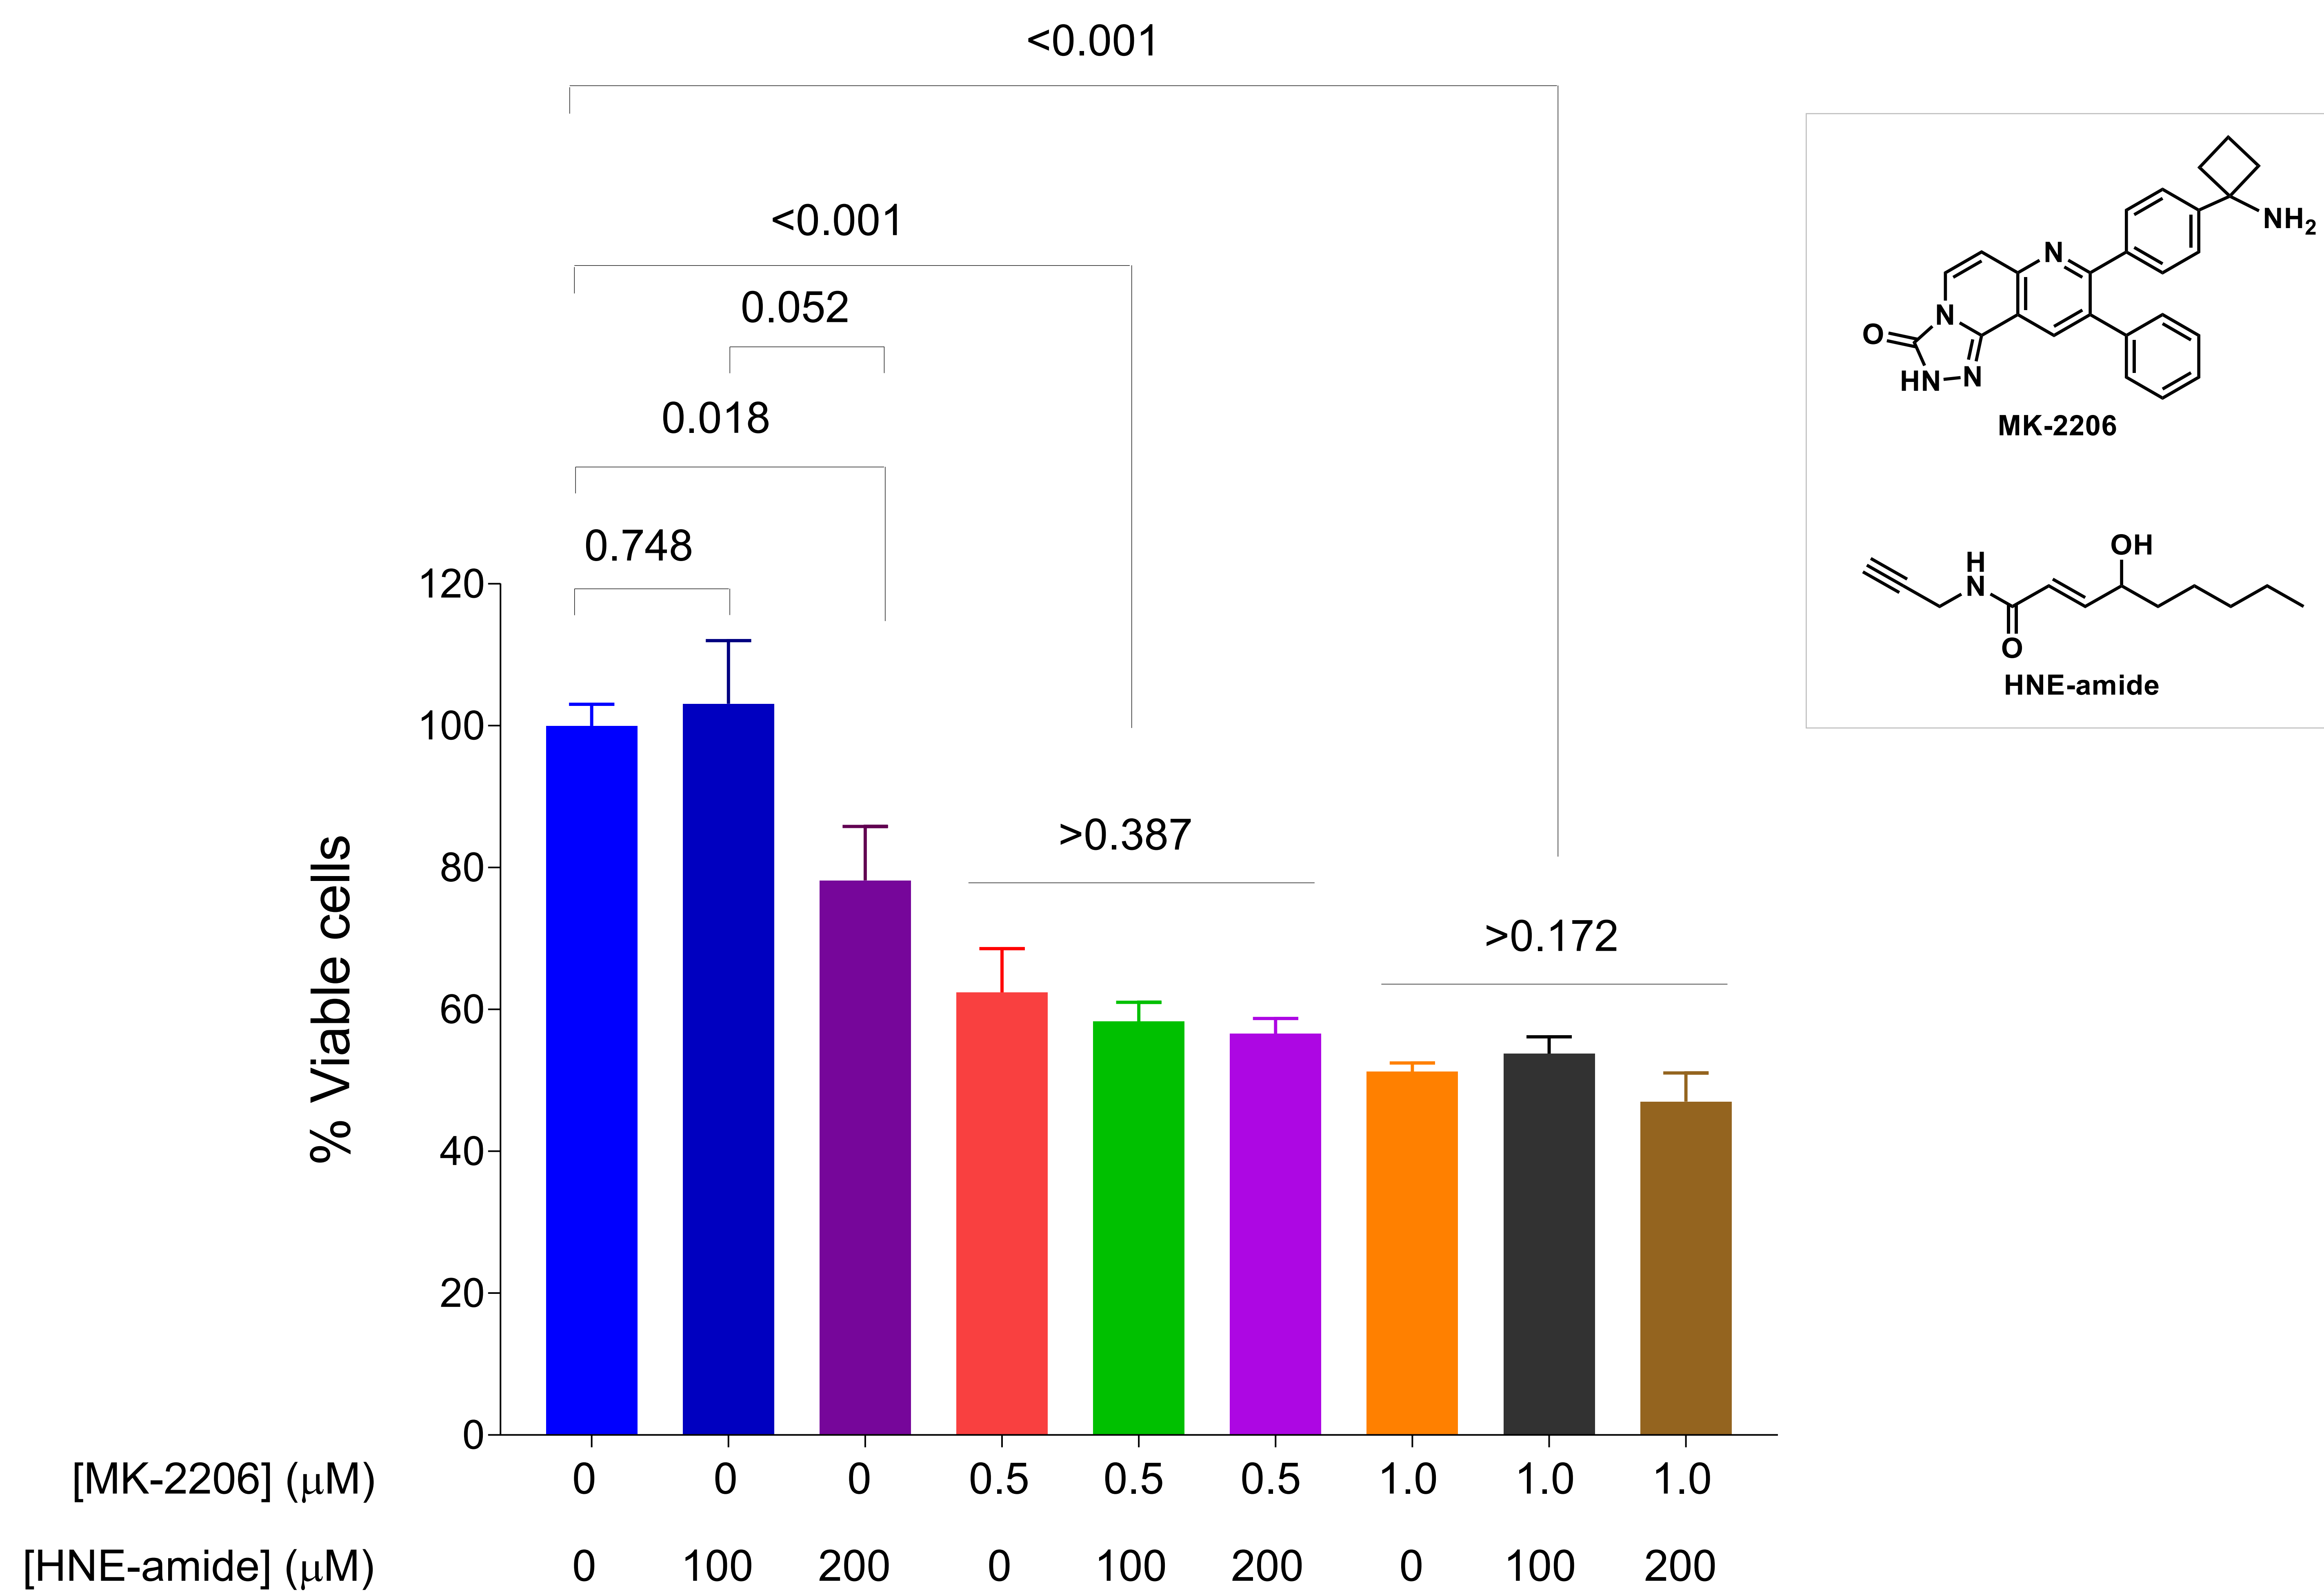

**Figure S12**

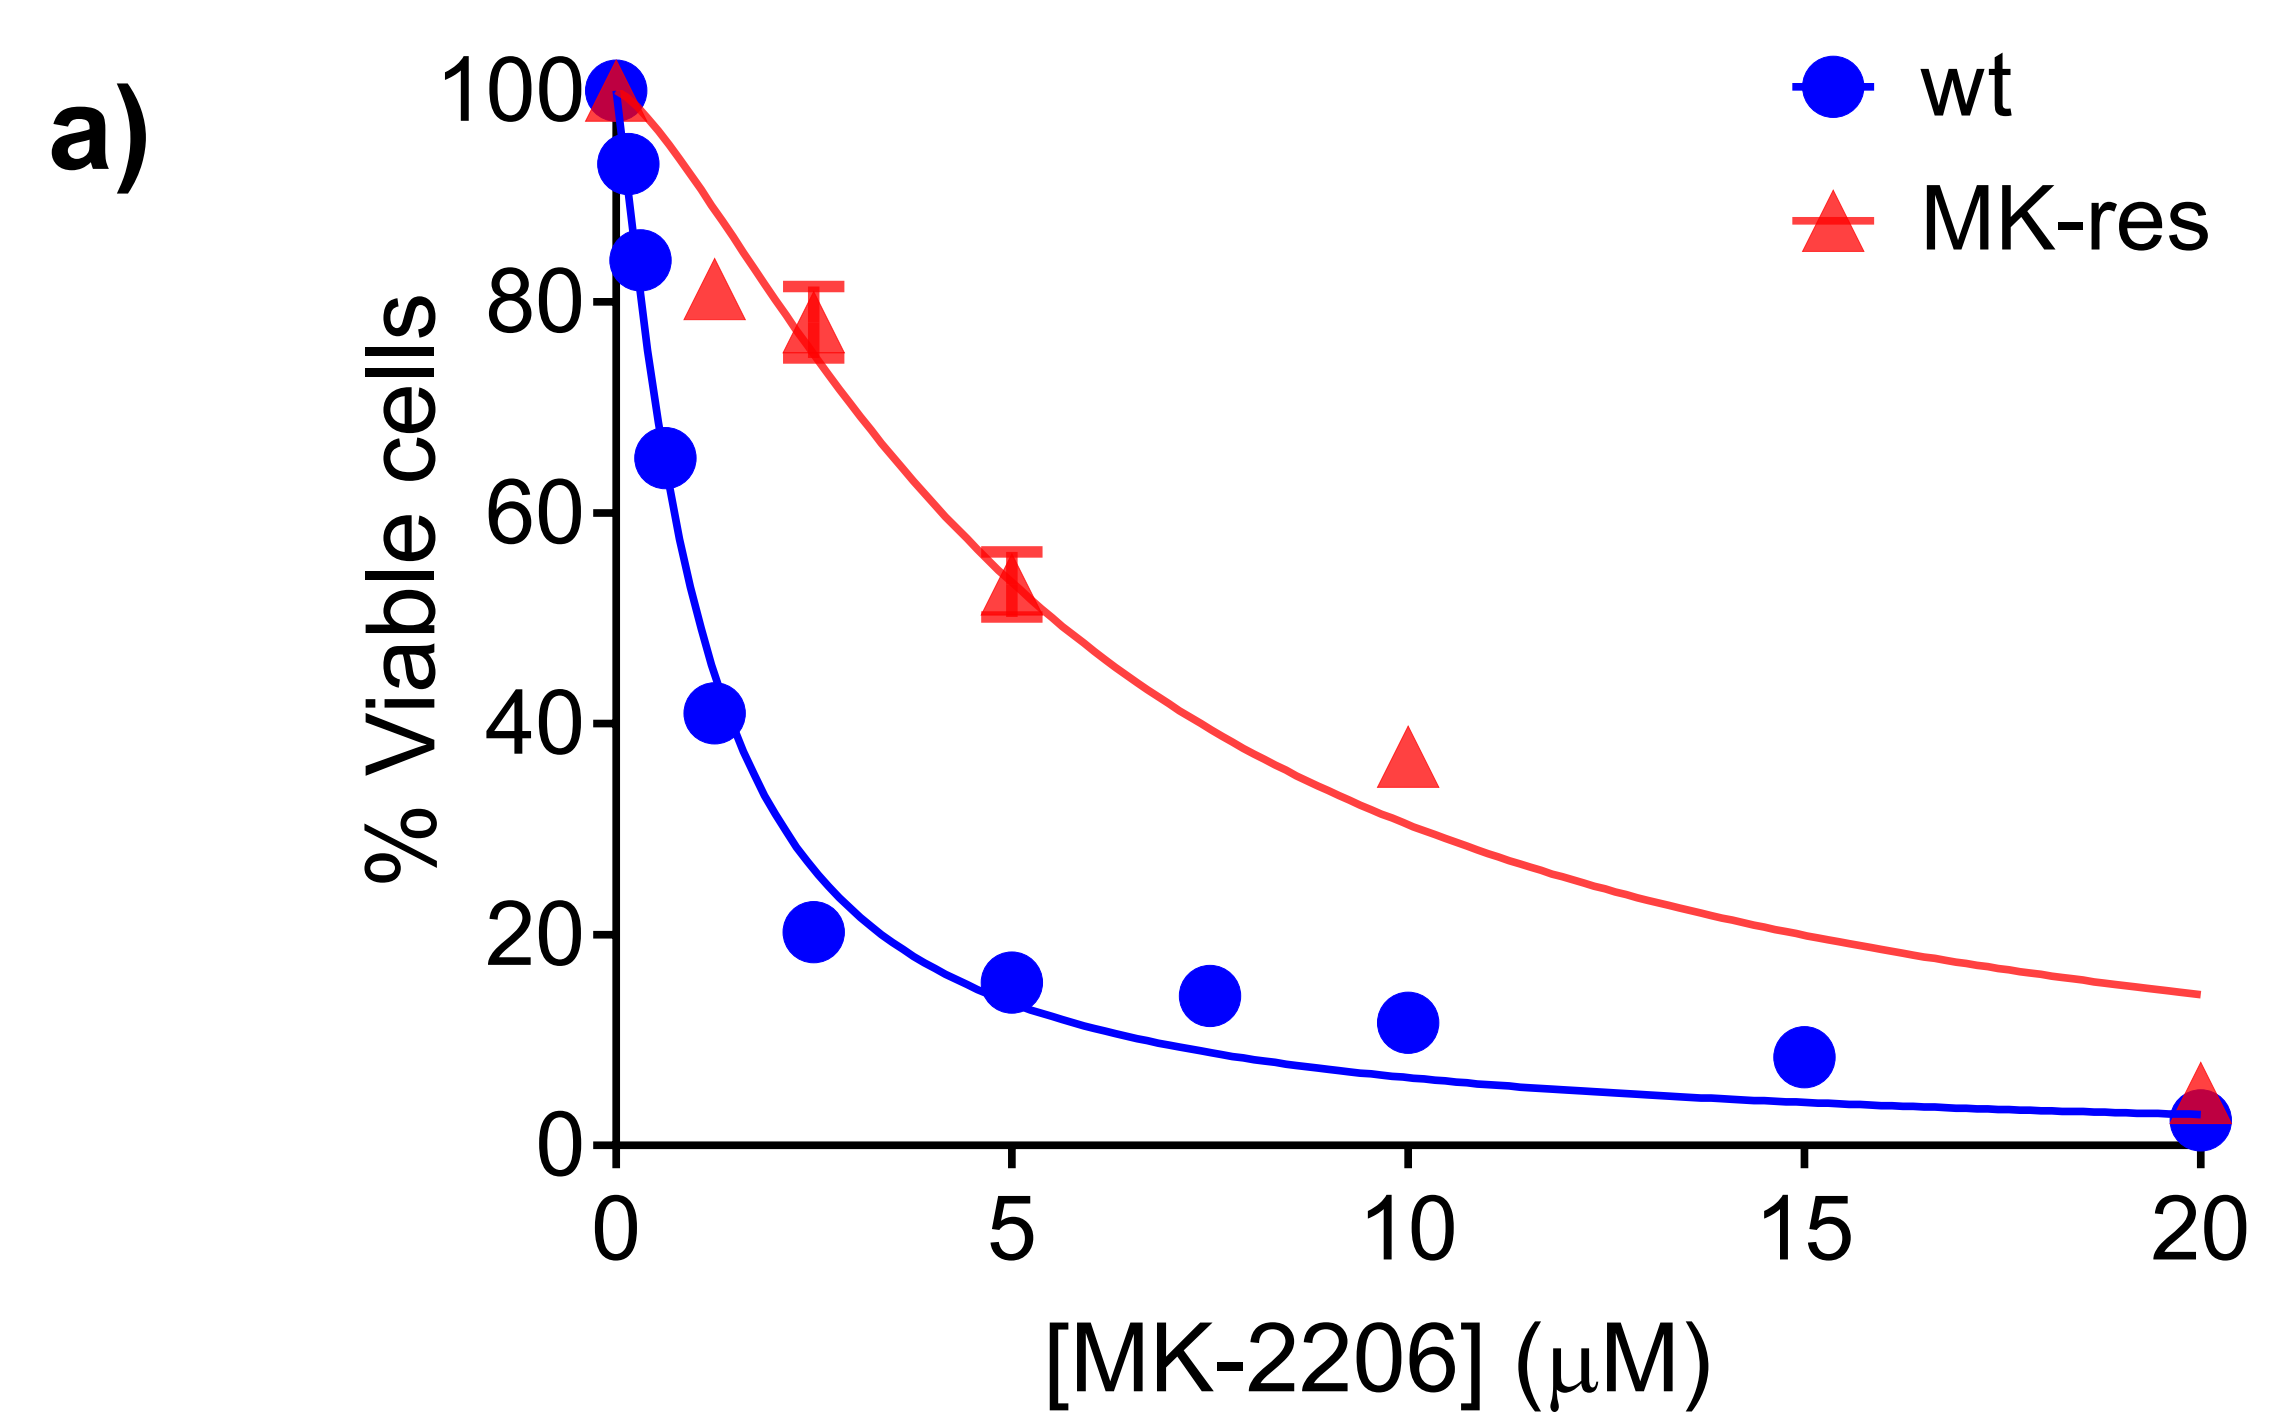

Fold increase in **MK-2206** resistance: 5.3

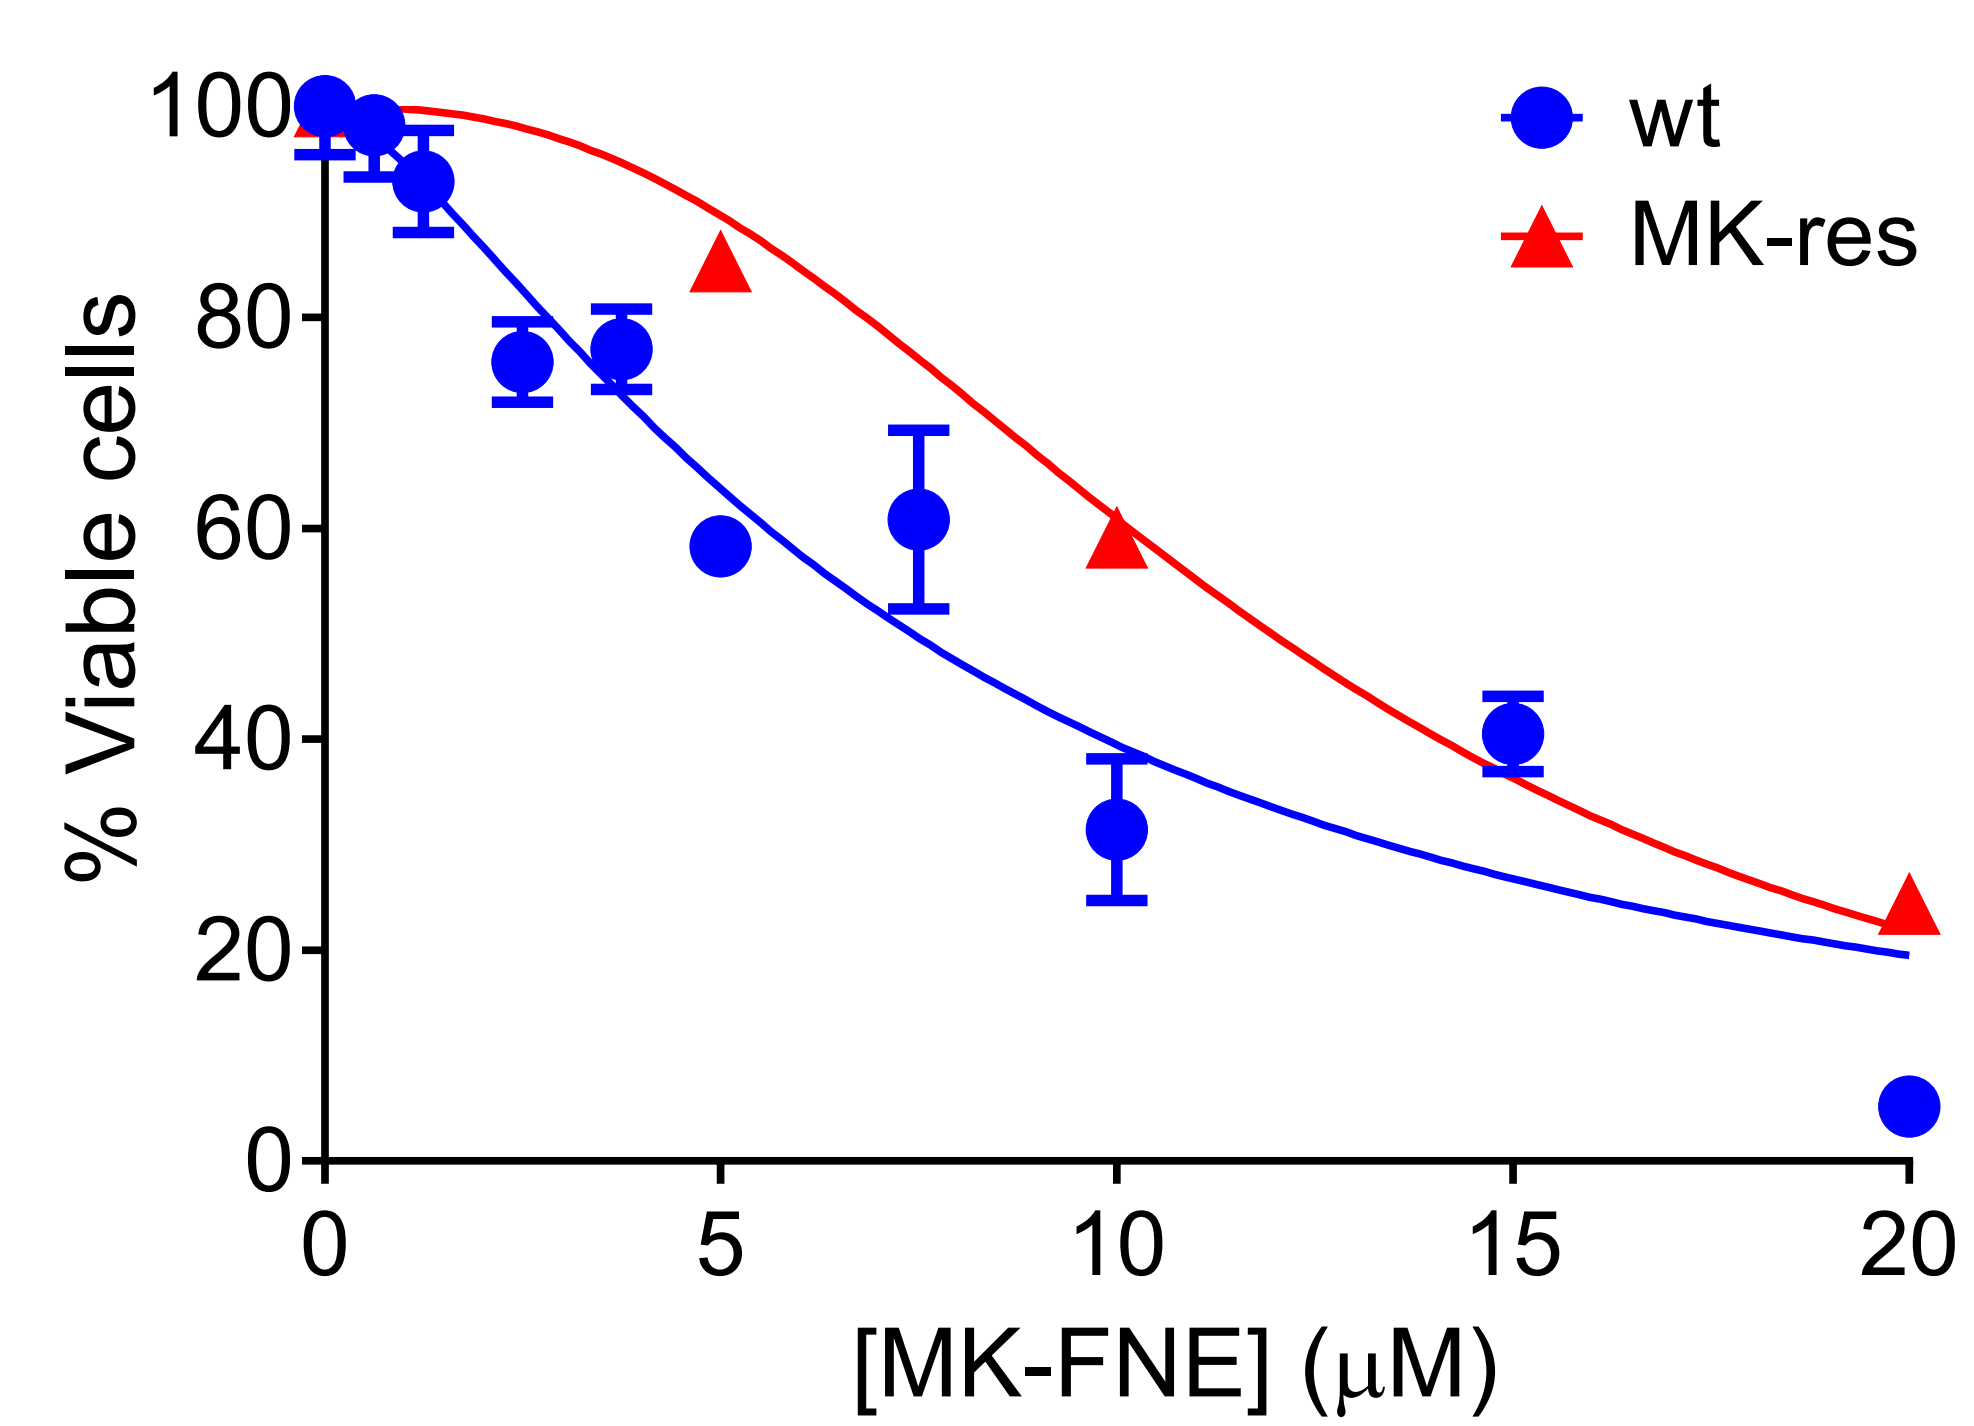

Fold increase in **MK-FNE** resistance: 1.6

**b)**

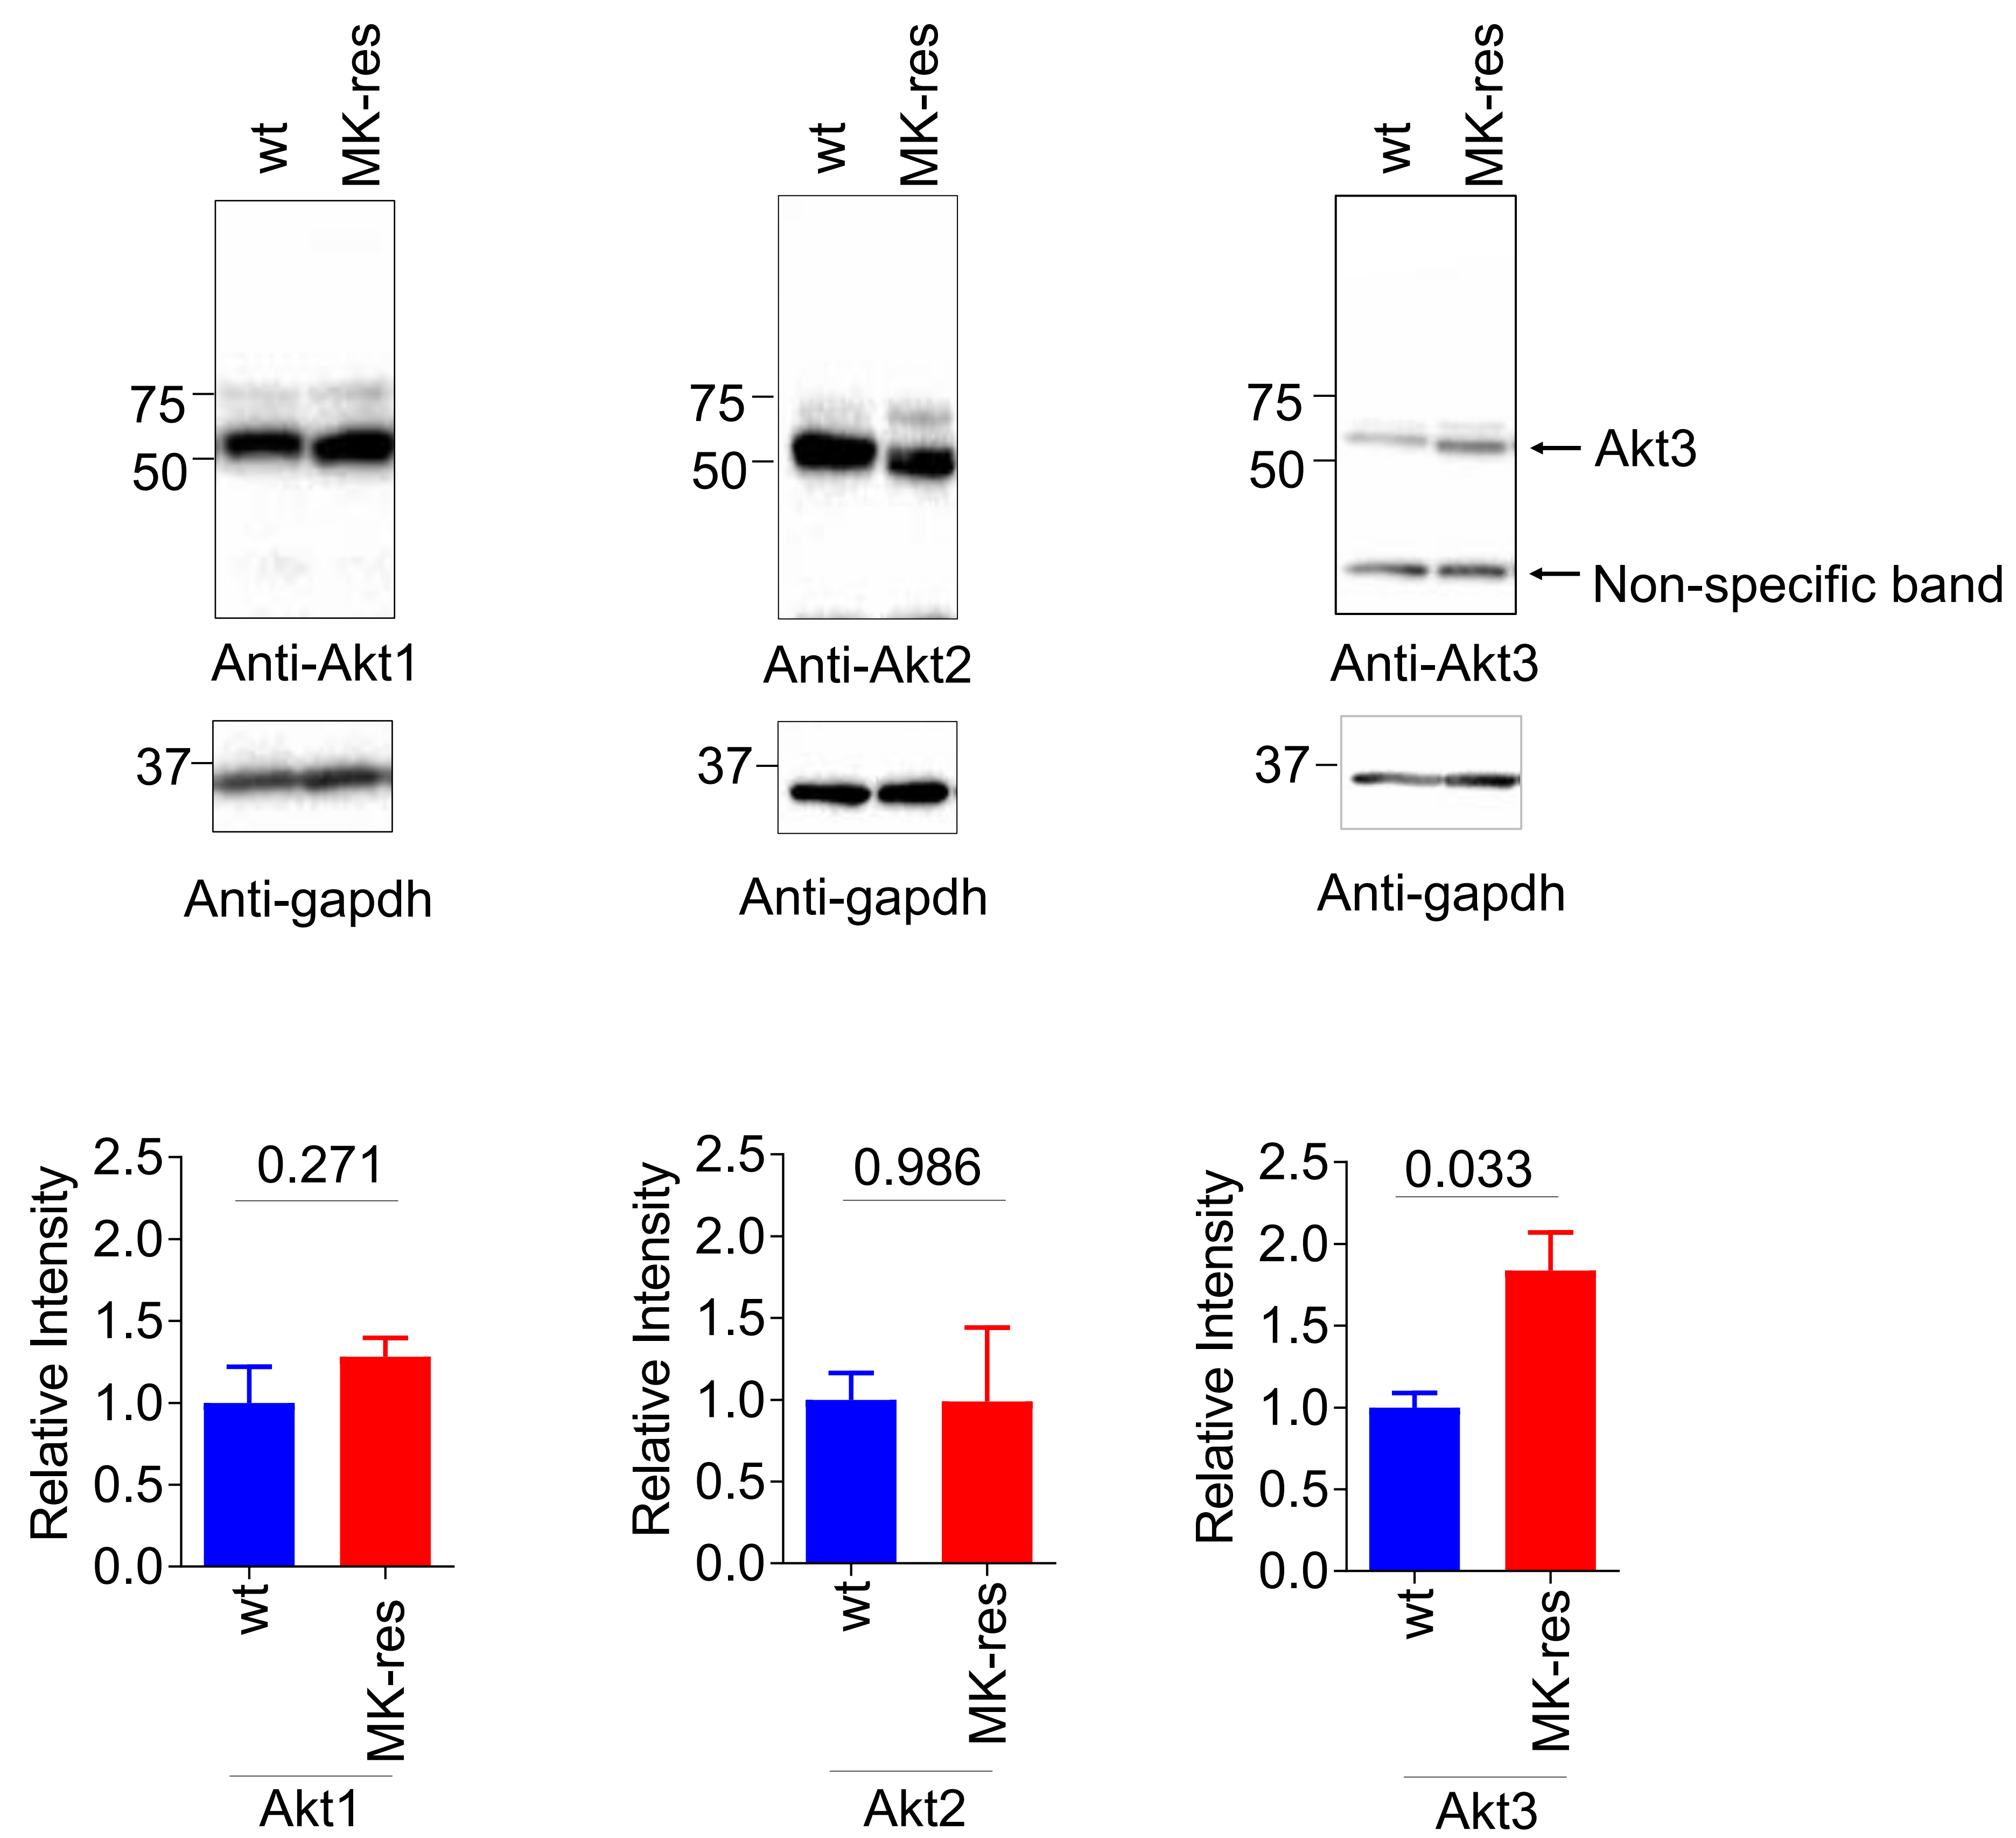

Figure S13

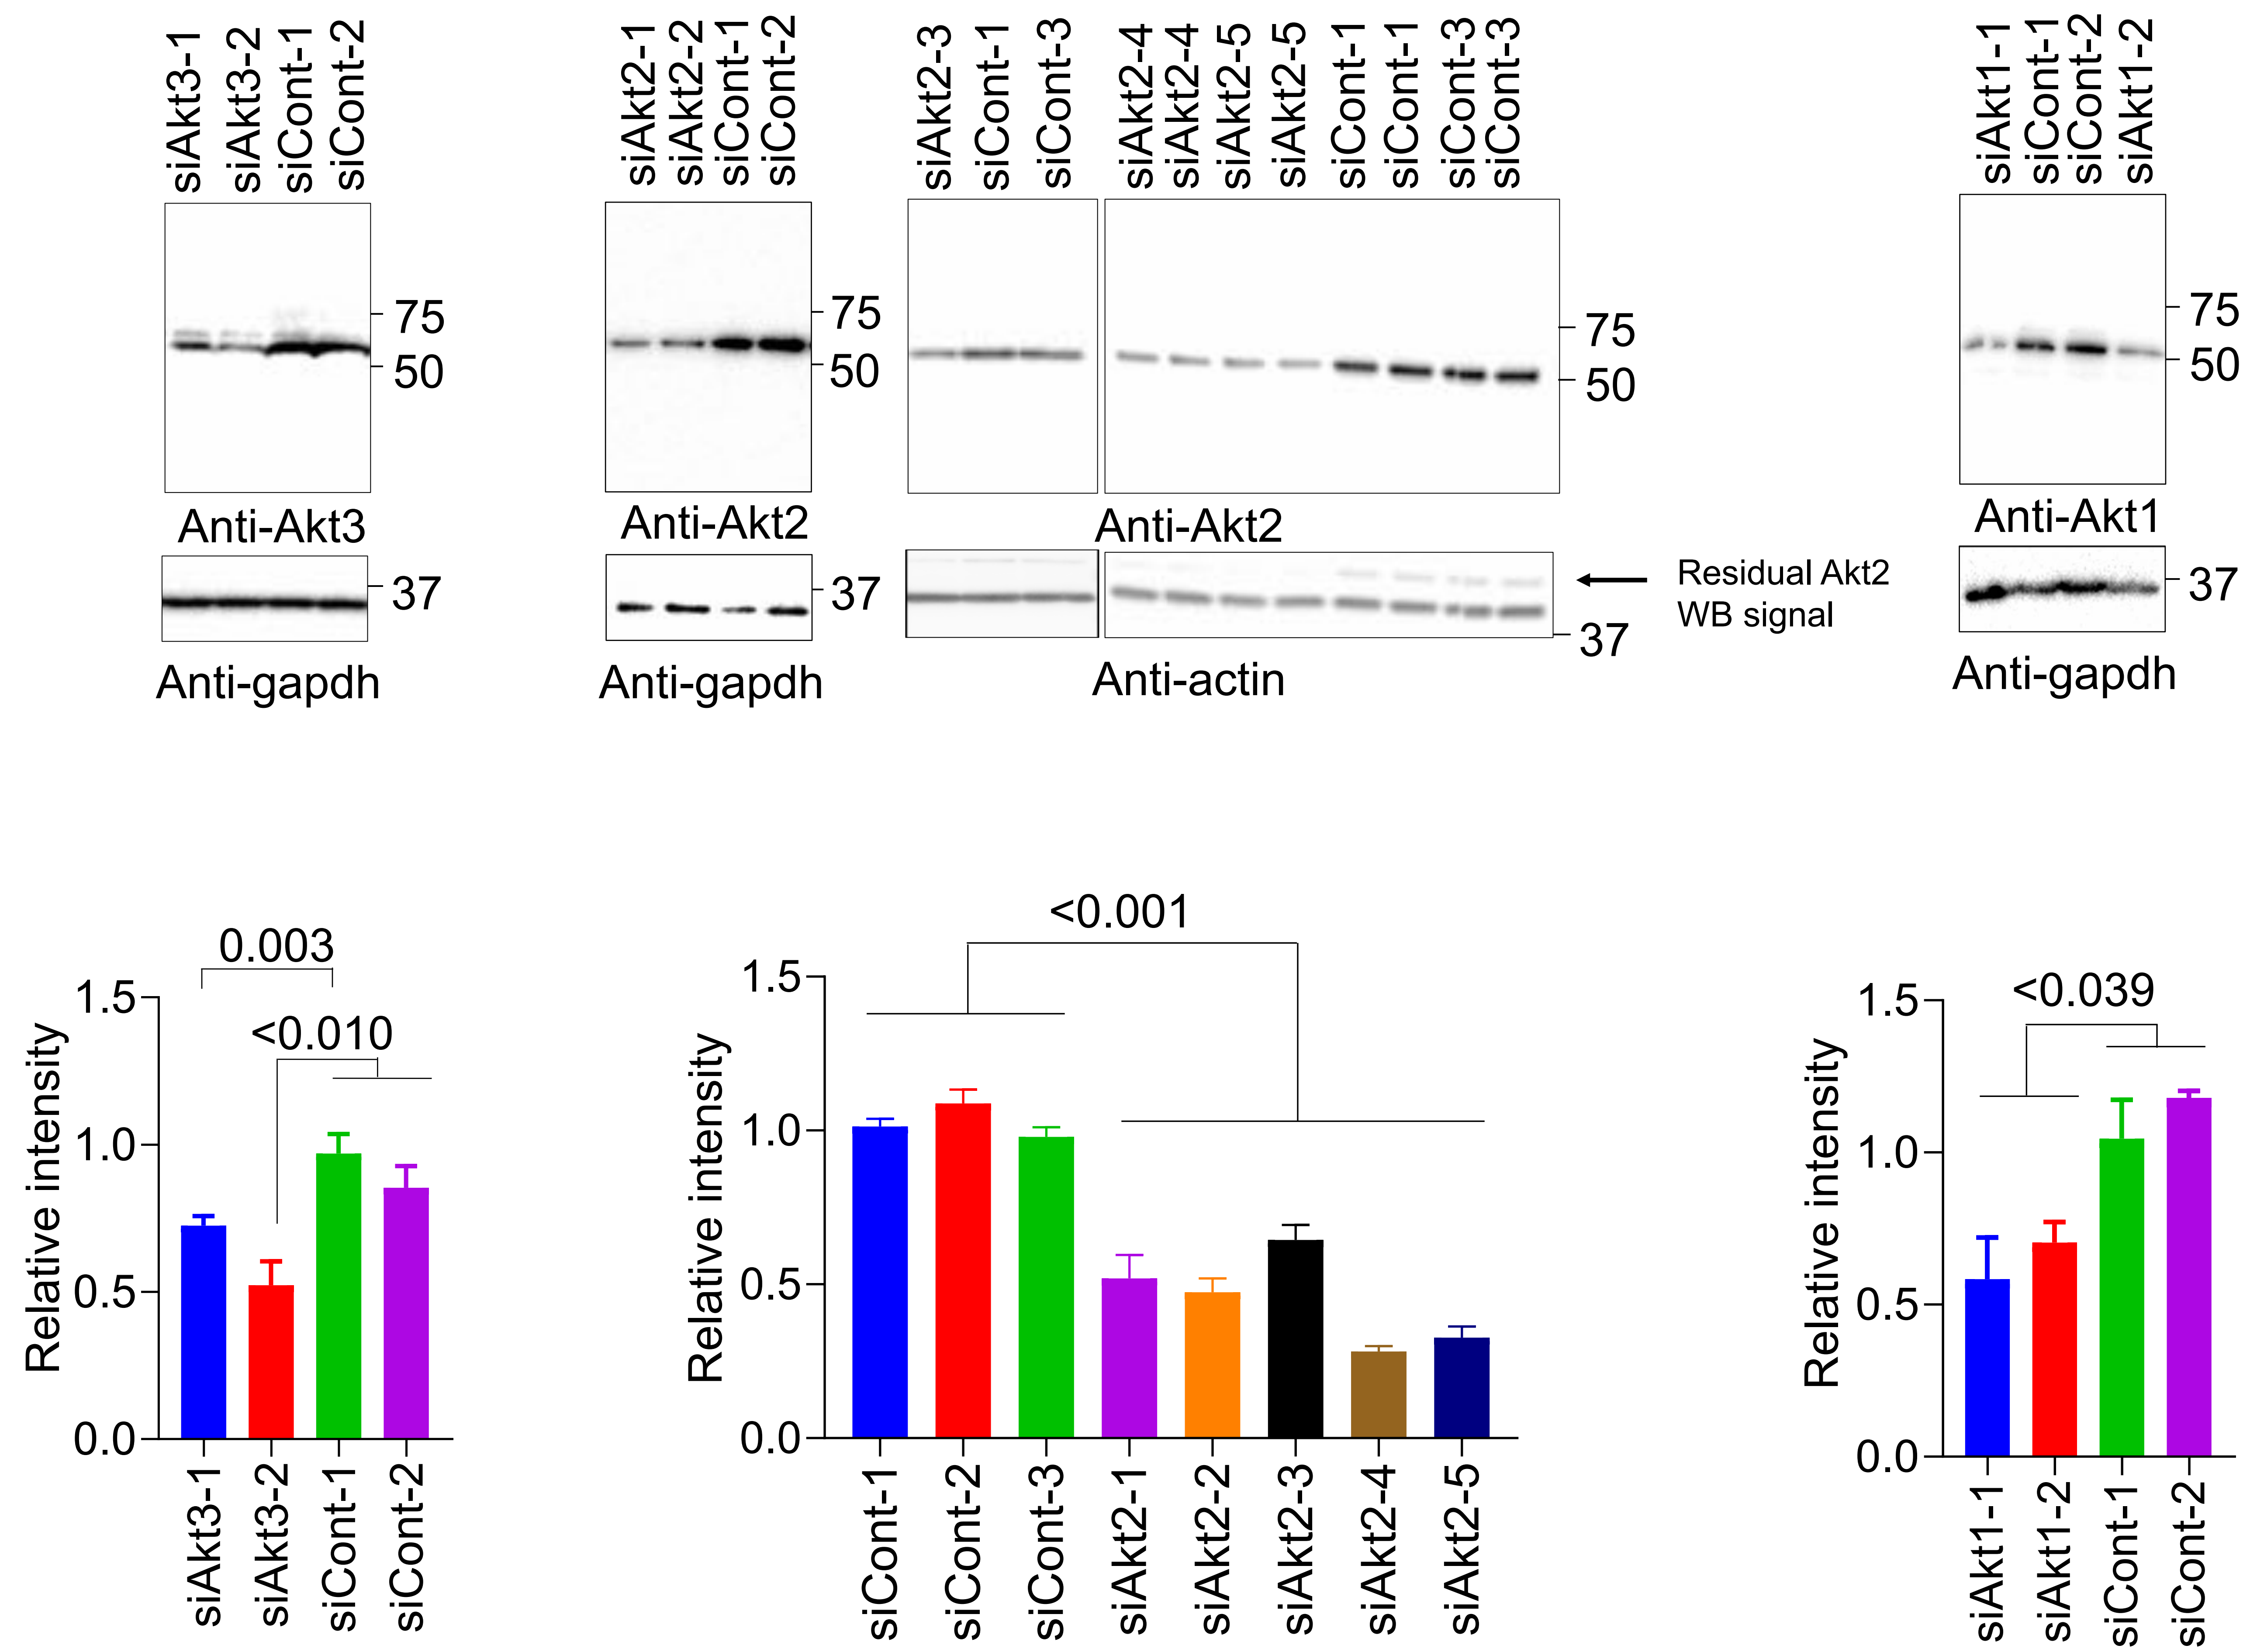

Figure S14

a)

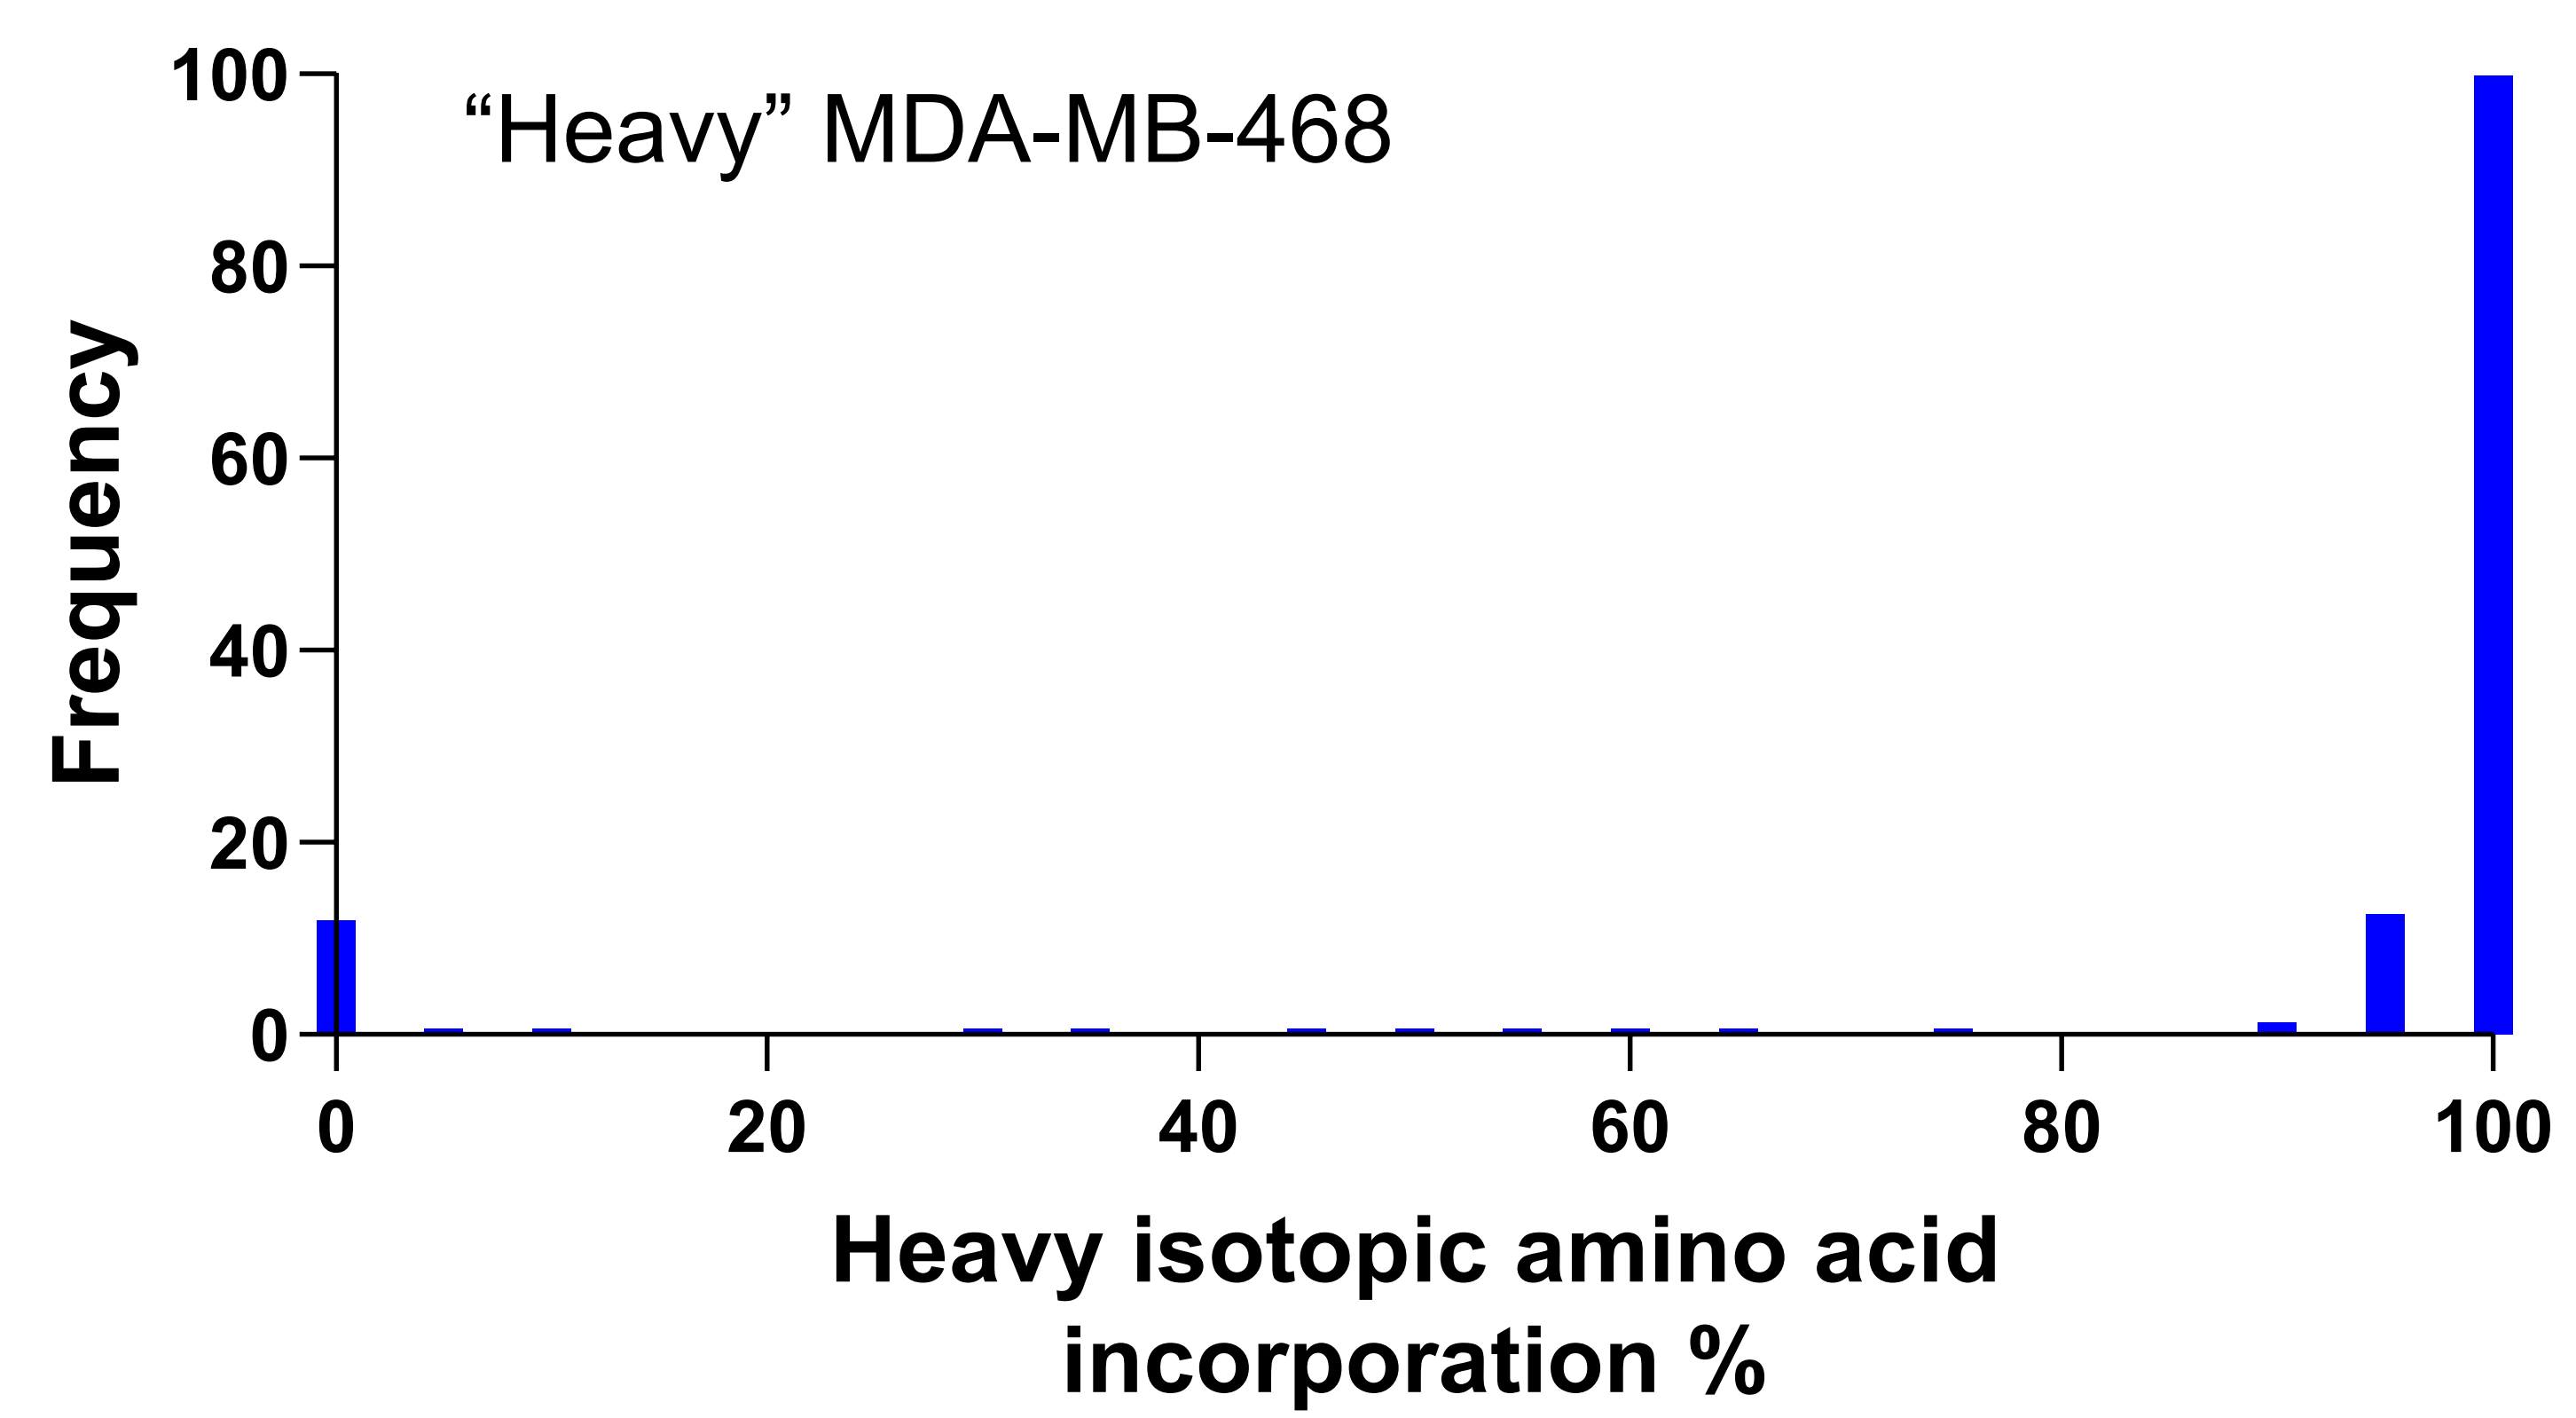

b)

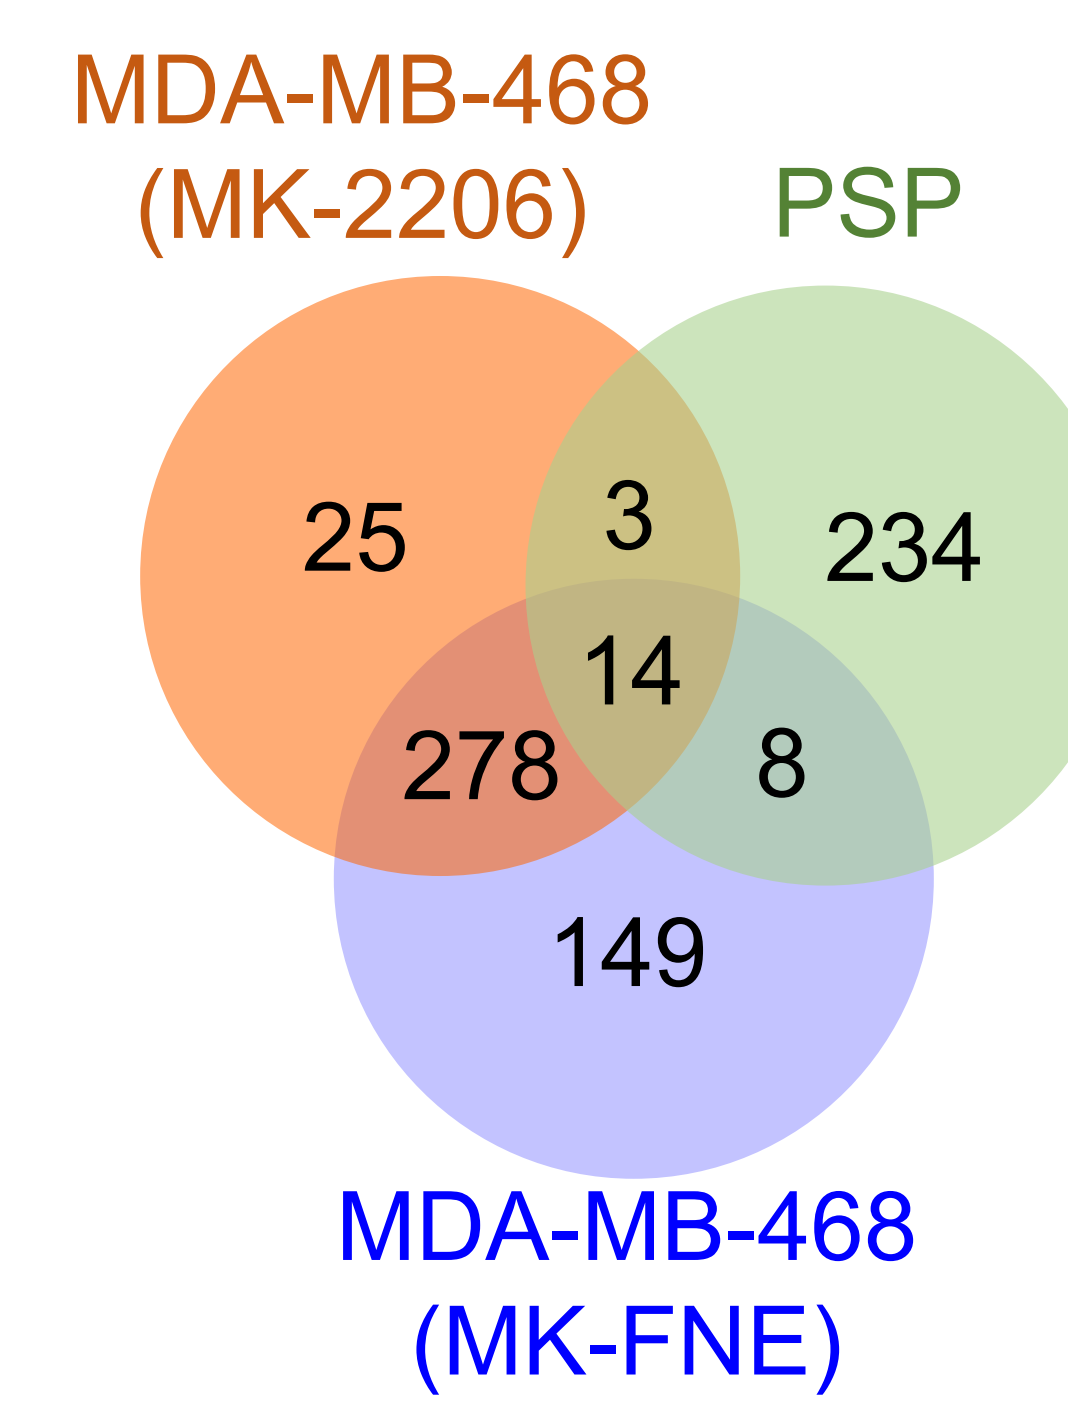

Figure S15

**KIFC1**

|                                 |     |
|---------------------------------|-----|
| 64 TSHPRVPSLTTVPQ <sup>a</sup>  | 77  |
| 90 KTGPRCSTAIATGL               | 103 |
| 150 LKRCRERTQTLDQE              | 163 |
| 215 ELEERLSTQEGLVQ              | 228 |
| 250 EKERRLQTSEAALS              | 263 |
| 269 VASLRQETVAQAAL <sup>a</sup> | 282 |
| 352 RSDERRGTLTGAPA <sup>a</sup> | 365 |
| 533 ERSSRSHSVFQLQI              | 546 |
| 651 LNSLRFASKVNQCV              | 664 |

**Grsf1**

|                                |     |
|--------------------------------|-----|
| 55 AVPTRSYSQESKTT <sup>a</sup> | 68  |
| 227 DYRGRRKTGEAYVQ             | 240 |

**JUP**

|                                |     |
|--------------------------------|-----|
| 47 EACGRQYTLKKT <sup>a</sup>   | 60  |
| 199 LDTARCTTSILHNL             | 212 |
| 229 PALVRMLSSPVESV             | 242 |
| 316 VQIMRNYSEKLLW              | 329 |
| 373 LWTLRNLSDVATKQ             | 386 |
| 456 VCALRHLSRHPEA <sup>a</sup> | 469 |
| 578 MEIFRLNTIPLFVQ             | 591 |



**Figure S16**

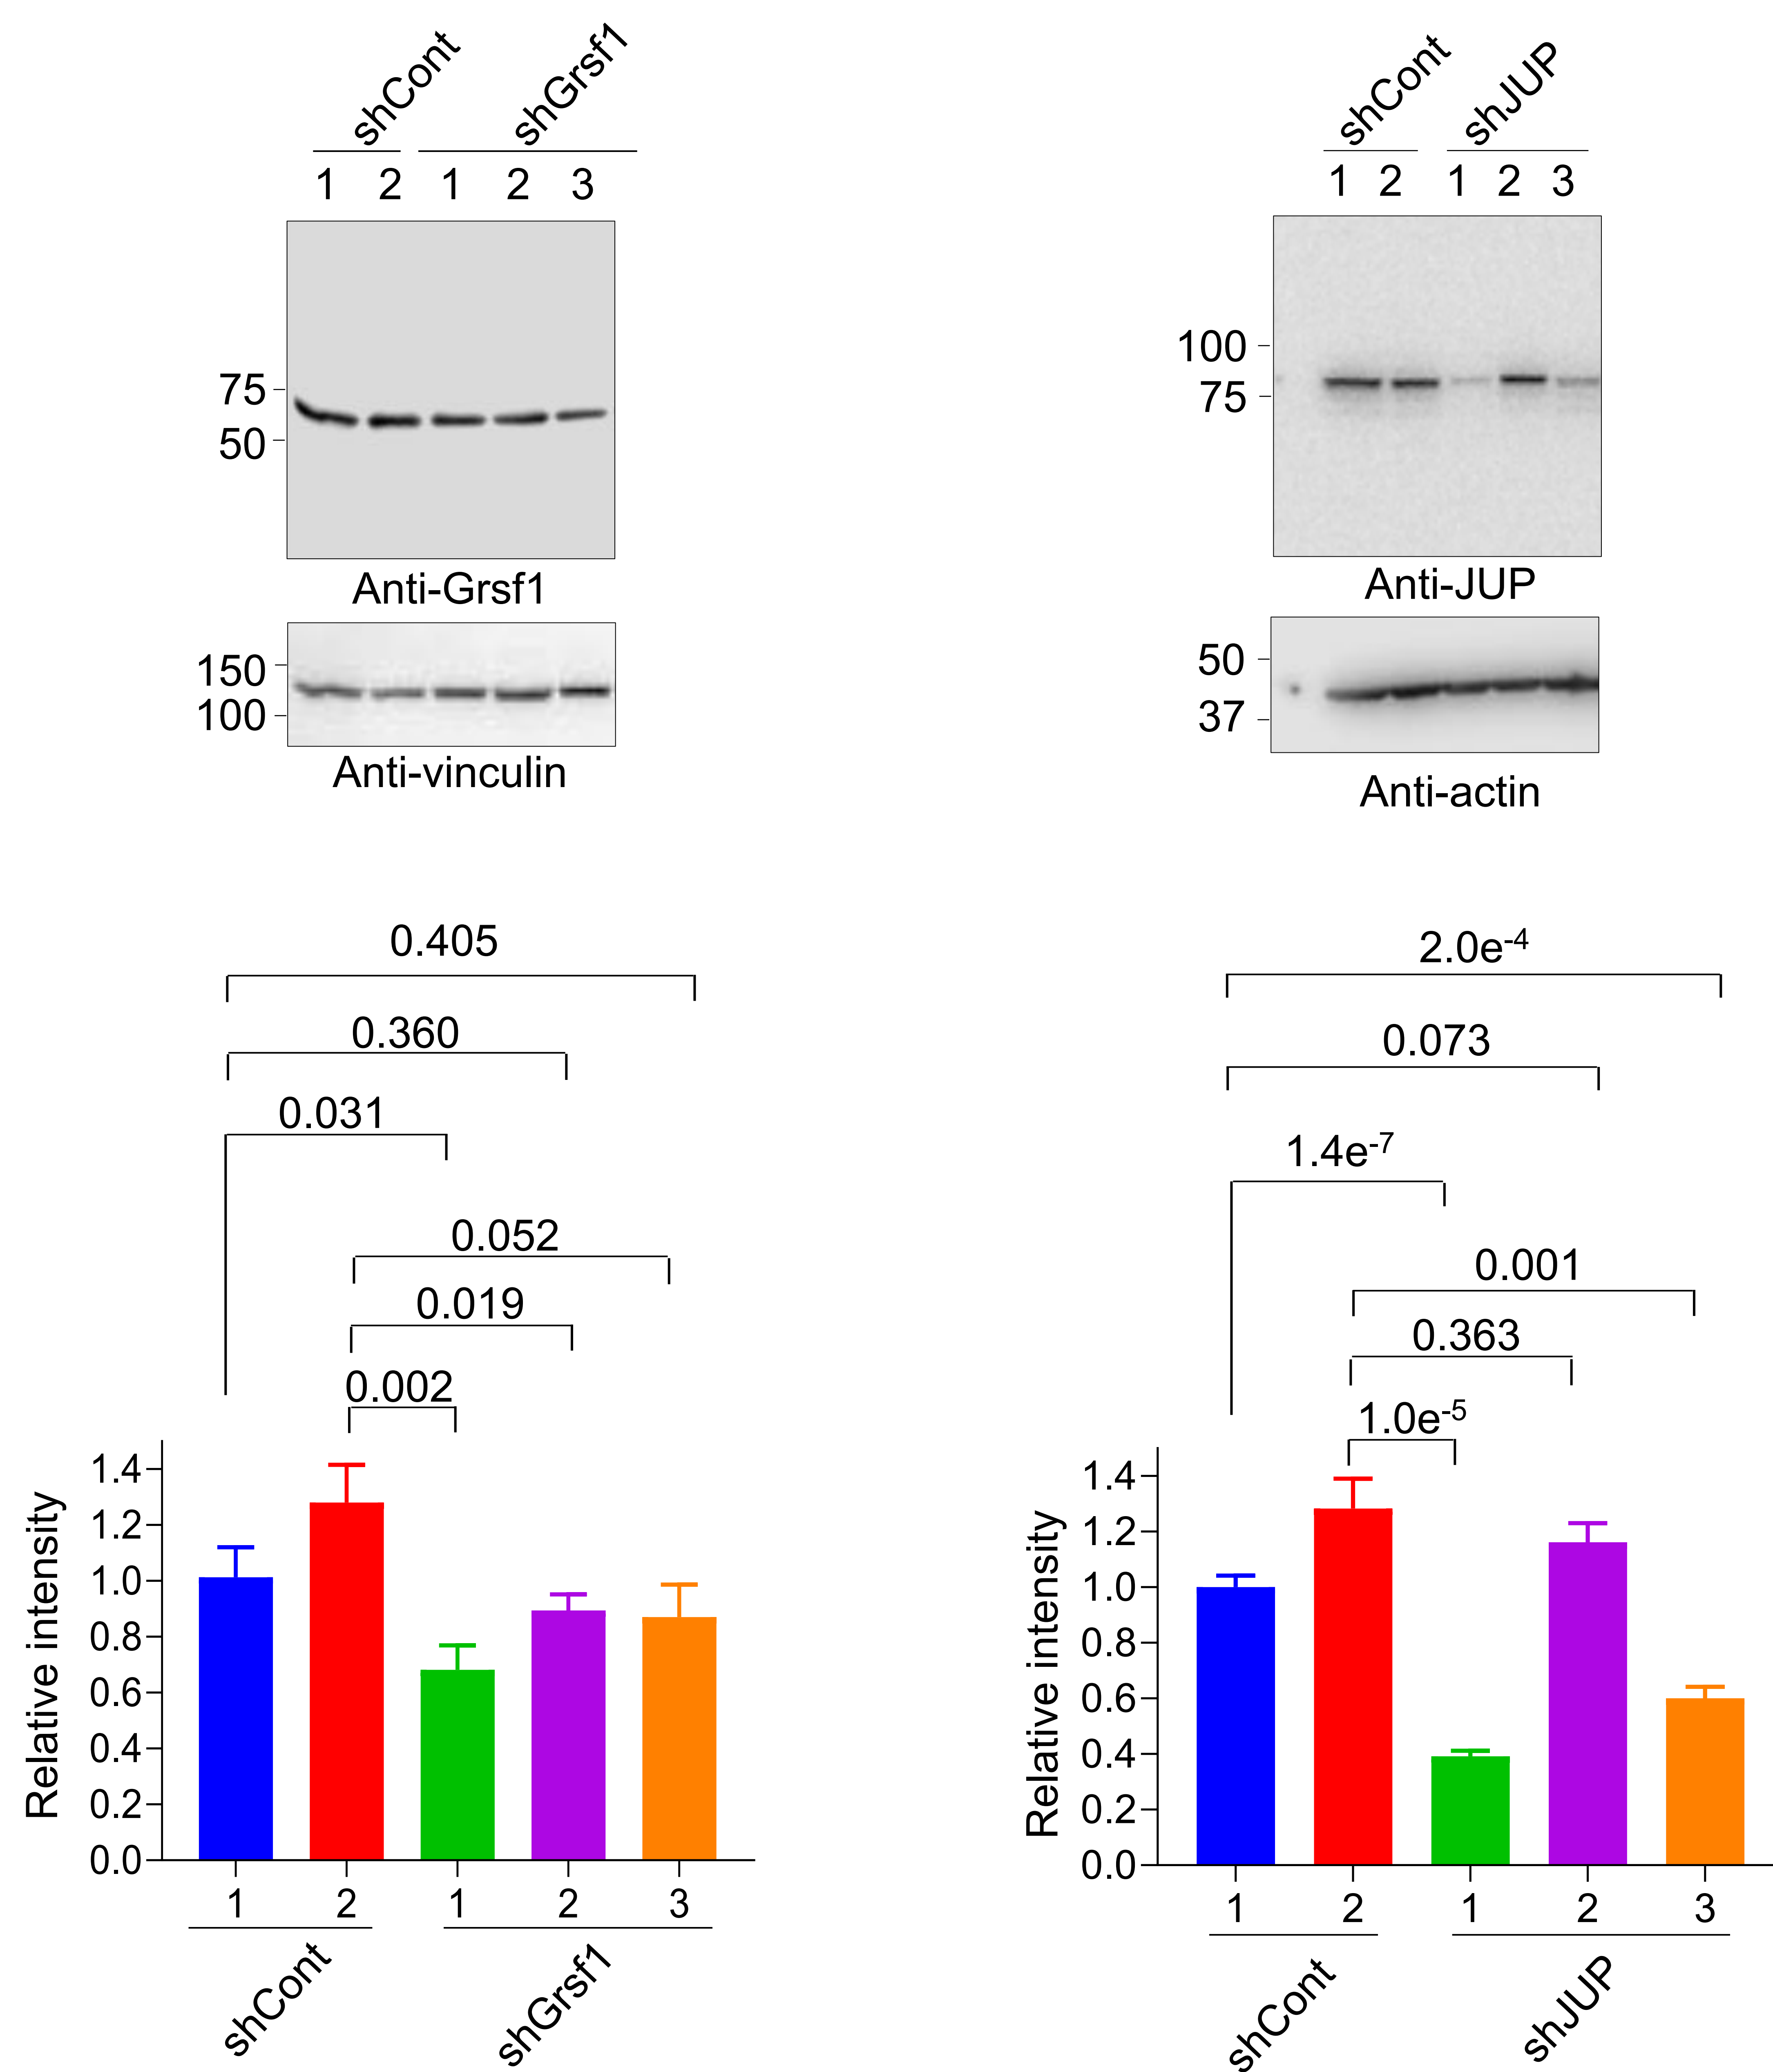

Figure S17

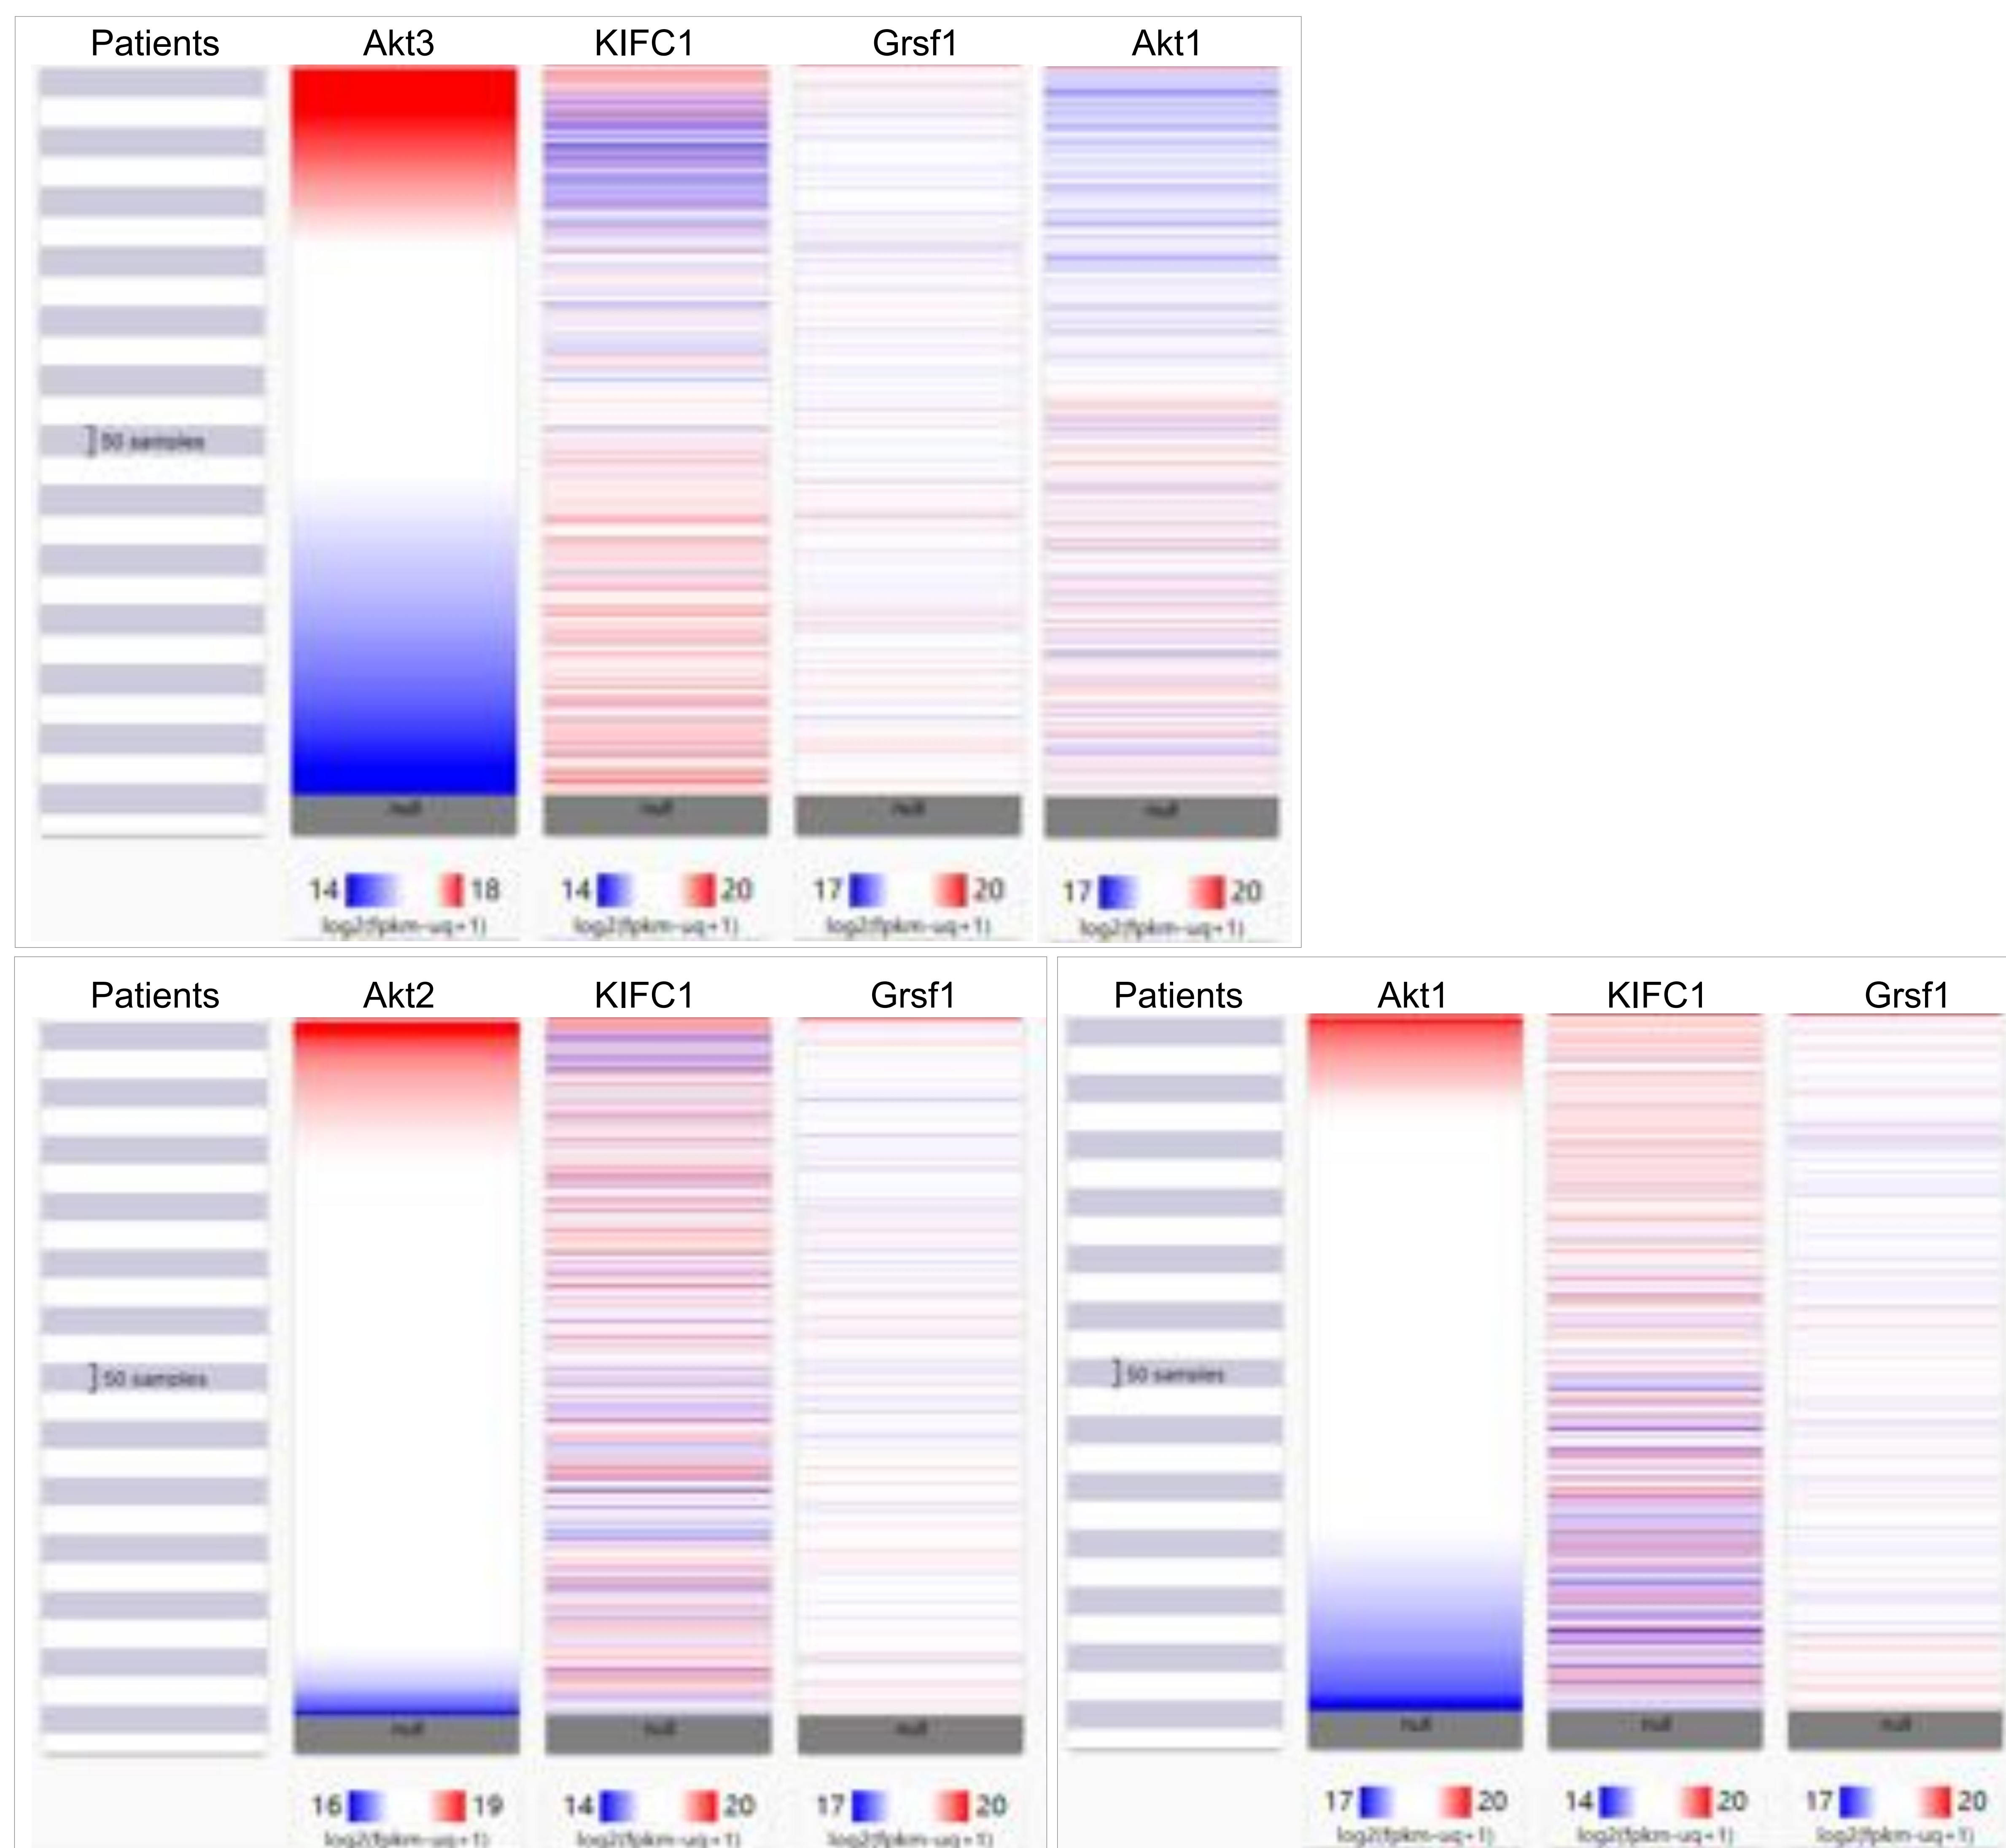

|                             | Akt3    |         |         | Akt2        |          | Akt1    |             |
|-----------------------------|---------|---------|---------|-------------|----------|---------|-------------|
|                             | KIFC1   | Grsf1   | Akt1    | KIFC1       | Grsf1    | KIFC1   | Grsf1       |
| <b>r-value</b>              | -0.3196 | -0.2150 | -0.3302 | 0.02945     | -0.08708 | 0.2209  | -0.05116    |
| <b>P-value (two tailed)</b> | <0.0001 | <0.0001 | <0.0001 | 0.3046 (ns) | 0.0024   | <0.0001 | 0.0744 (ns) |

Figure S18

GDC & TCGA lung adenocarcinoma database

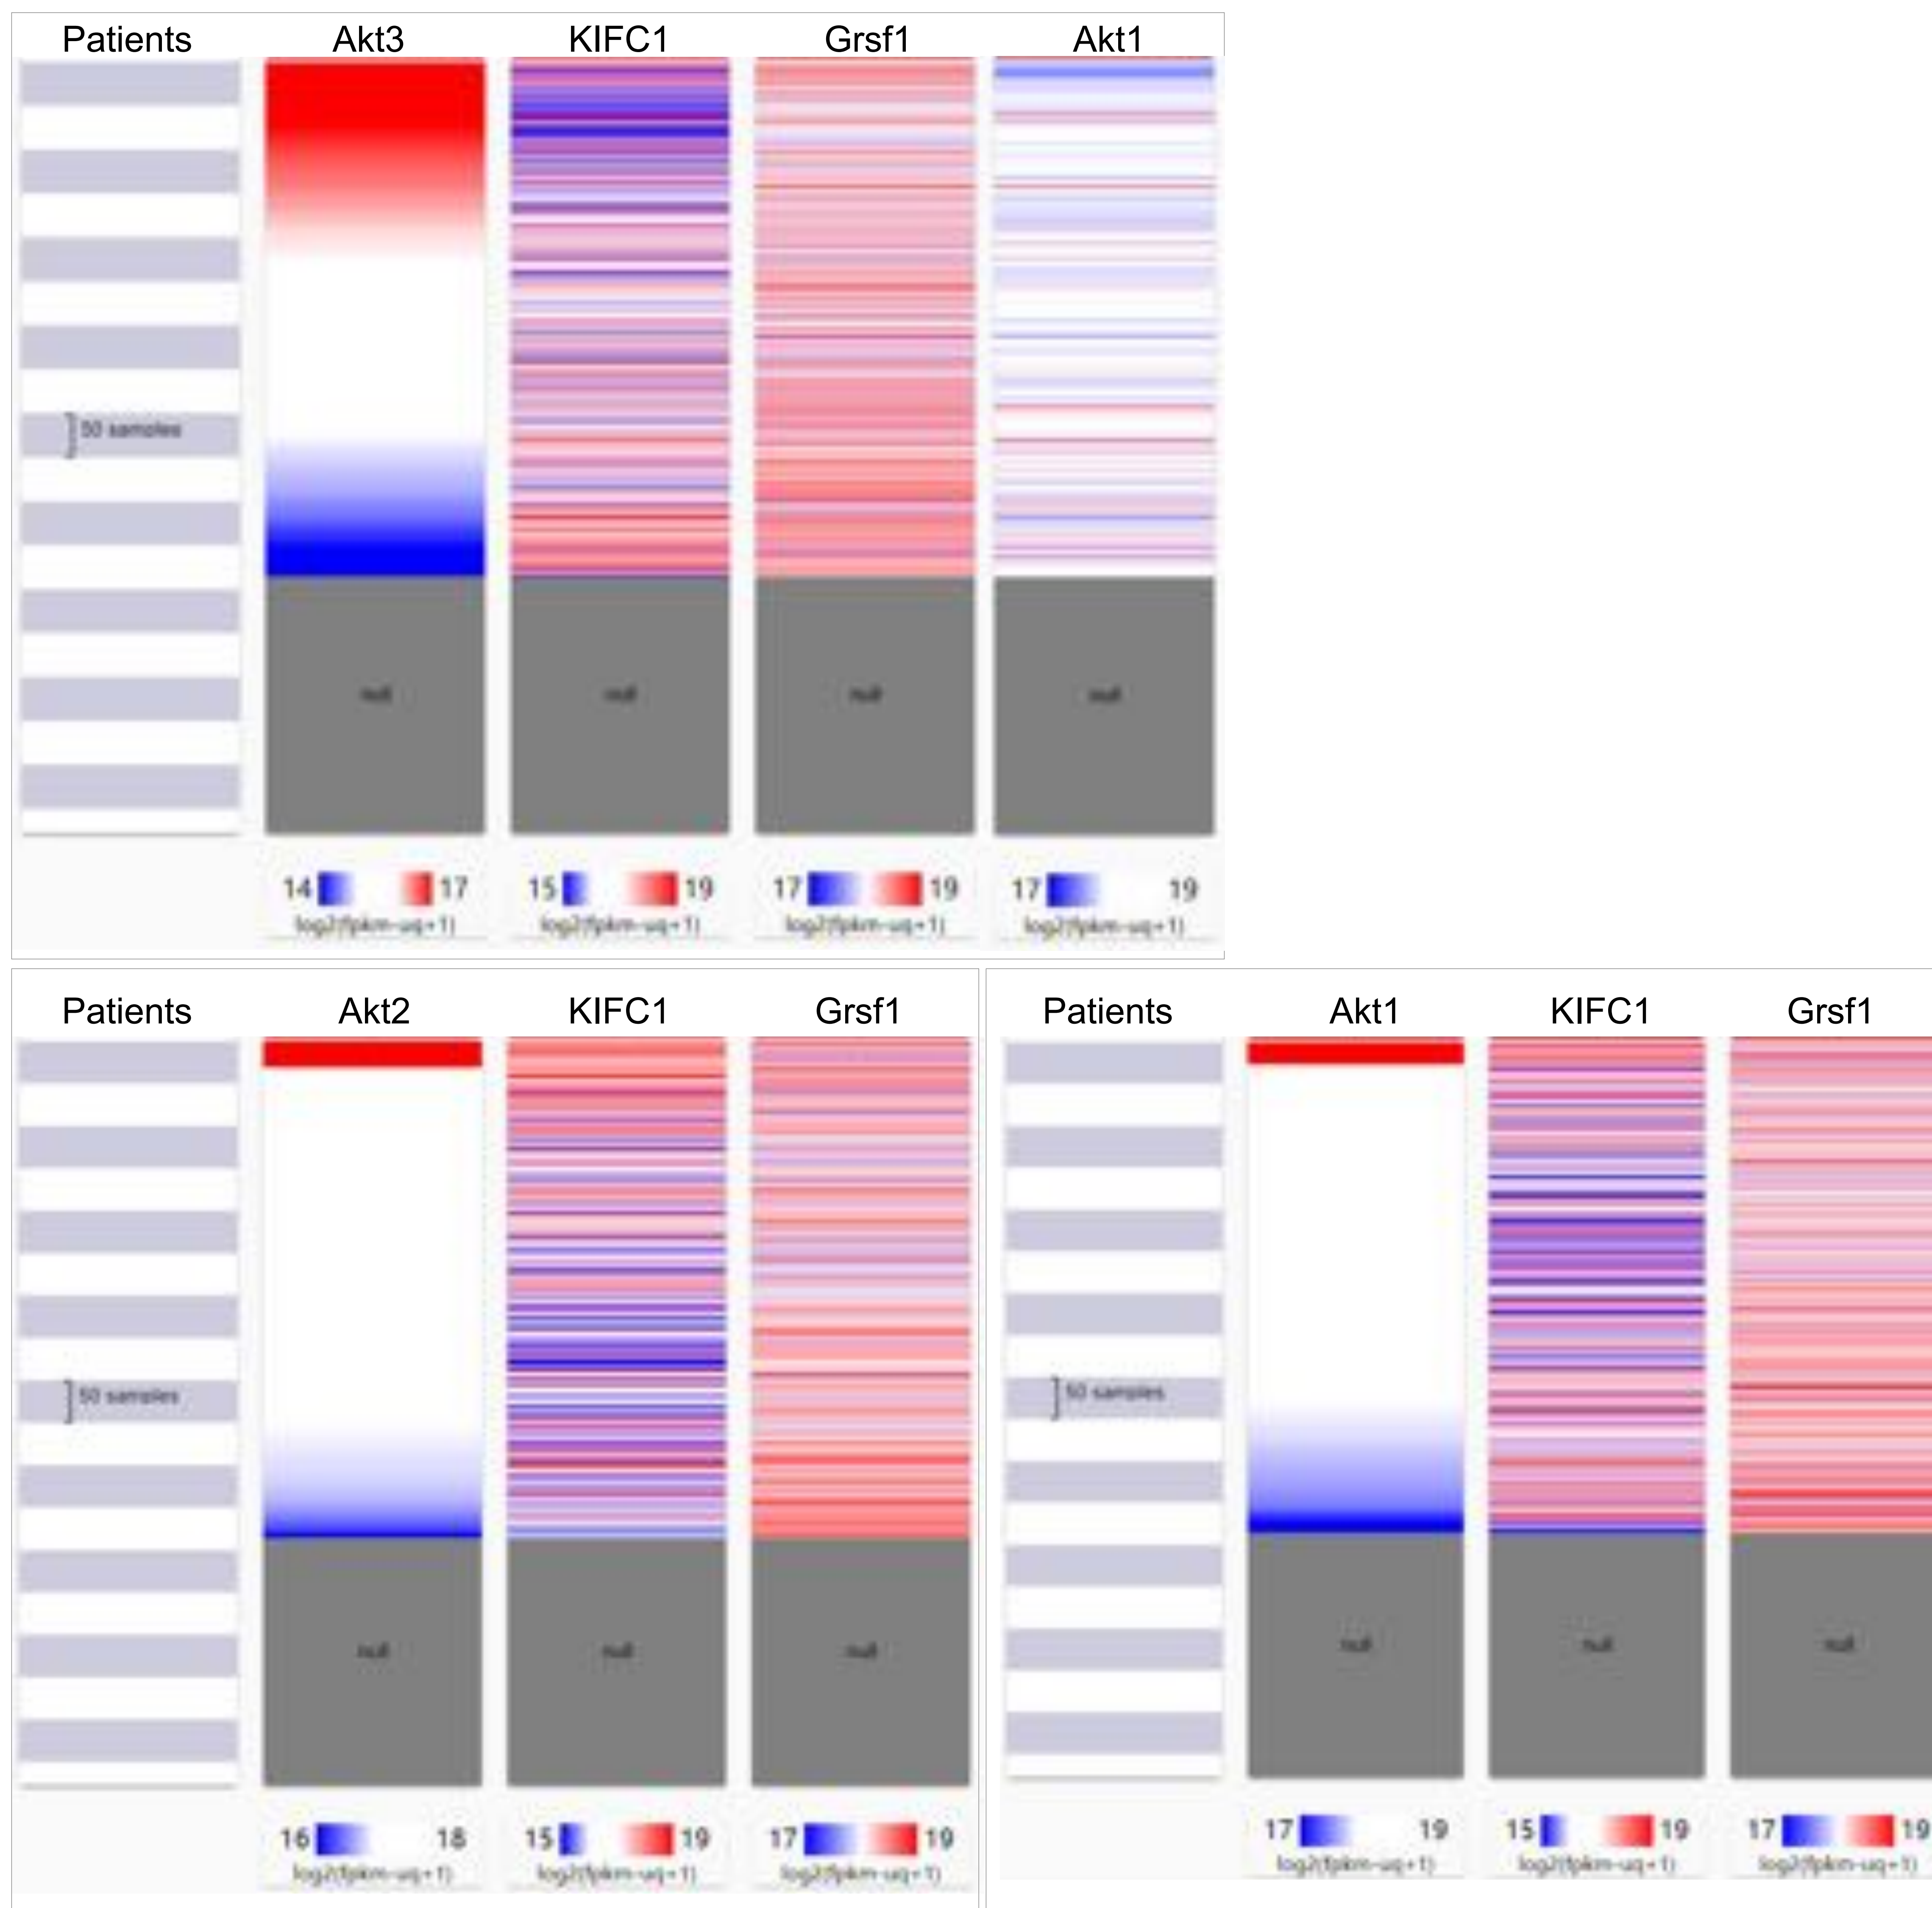

|                             | Akt3    |         |         | Akt2    |         | Akt1        |         |
|-----------------------------|---------|---------|---------|---------|---------|-------------|---------|
|                             | KIFC1   | Grsf1   | Akt1    | KIFC1   | Grsf1   | KIFC1       | Grsf1   |
| <i>r-value</i>              | -0.2356 | -0.1428 | -0.1802 | 0.3050  | -0.1134 | 0.07164     | -0.1547 |
| <i>P-value (two tailed)</i> | <0.0001 | 0.0005  | <0.0001 | <0.0001 | 0.0060  | 0.0834 (ns) | 0.0002  |

Figure S19

GDC & TCGA stomach cancer database

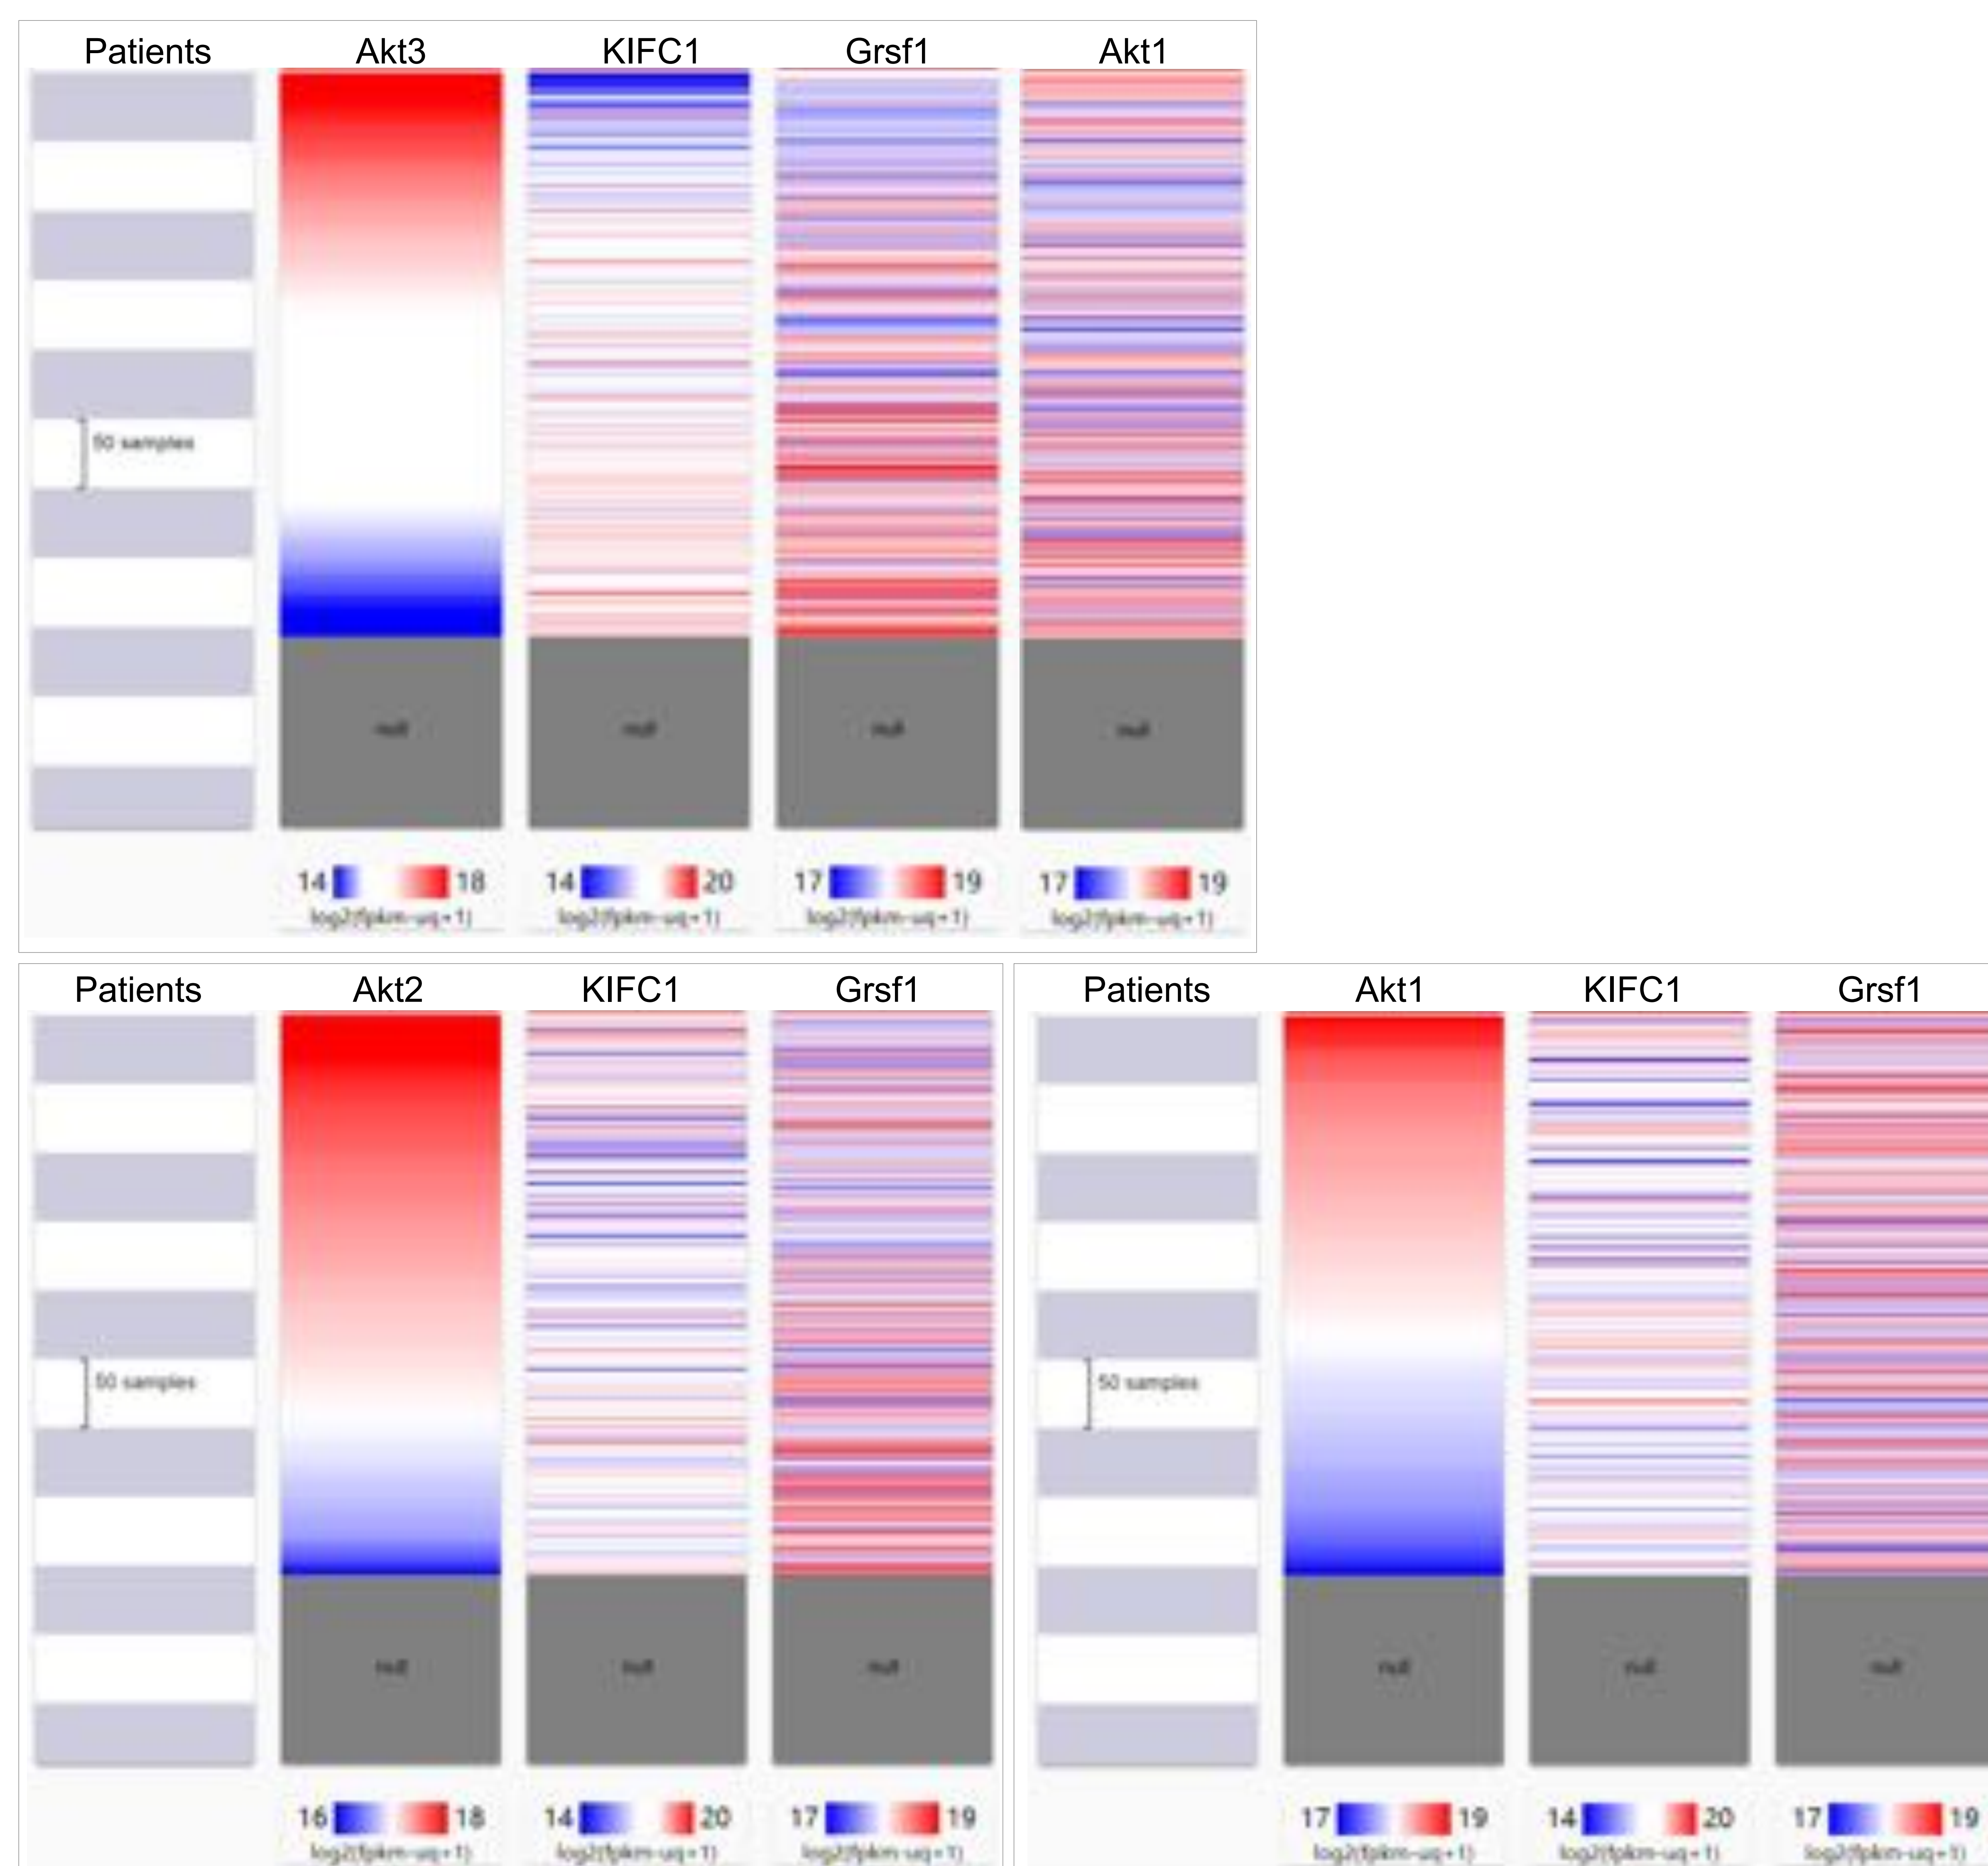

|                             | Akt3    |         |             | Akt2        |         | Akt1        |        |
|-----------------------------|---------|---------|-------------|-------------|---------|-------------|--------|
|                             | KIFC1   | Grsf1   | Akt1        | KIFC1       | Grsf1   | KIFC1       | Grsf1  |
| <b>r-value</b>              | -0.6038 | -0.3894 | -0.07261    | -0.01795    | -0.2237 | 0.02342     | 0.1099 |
| <b>P-value (two tailed)</b> | <0.0001 | <0.0001 | 0.1437 (ns) | 0.7181 (ns) | <0.0001 | 0.6375 (ns) | 0.0267 |

Figure S20

TCGA colon and rectal cancer database

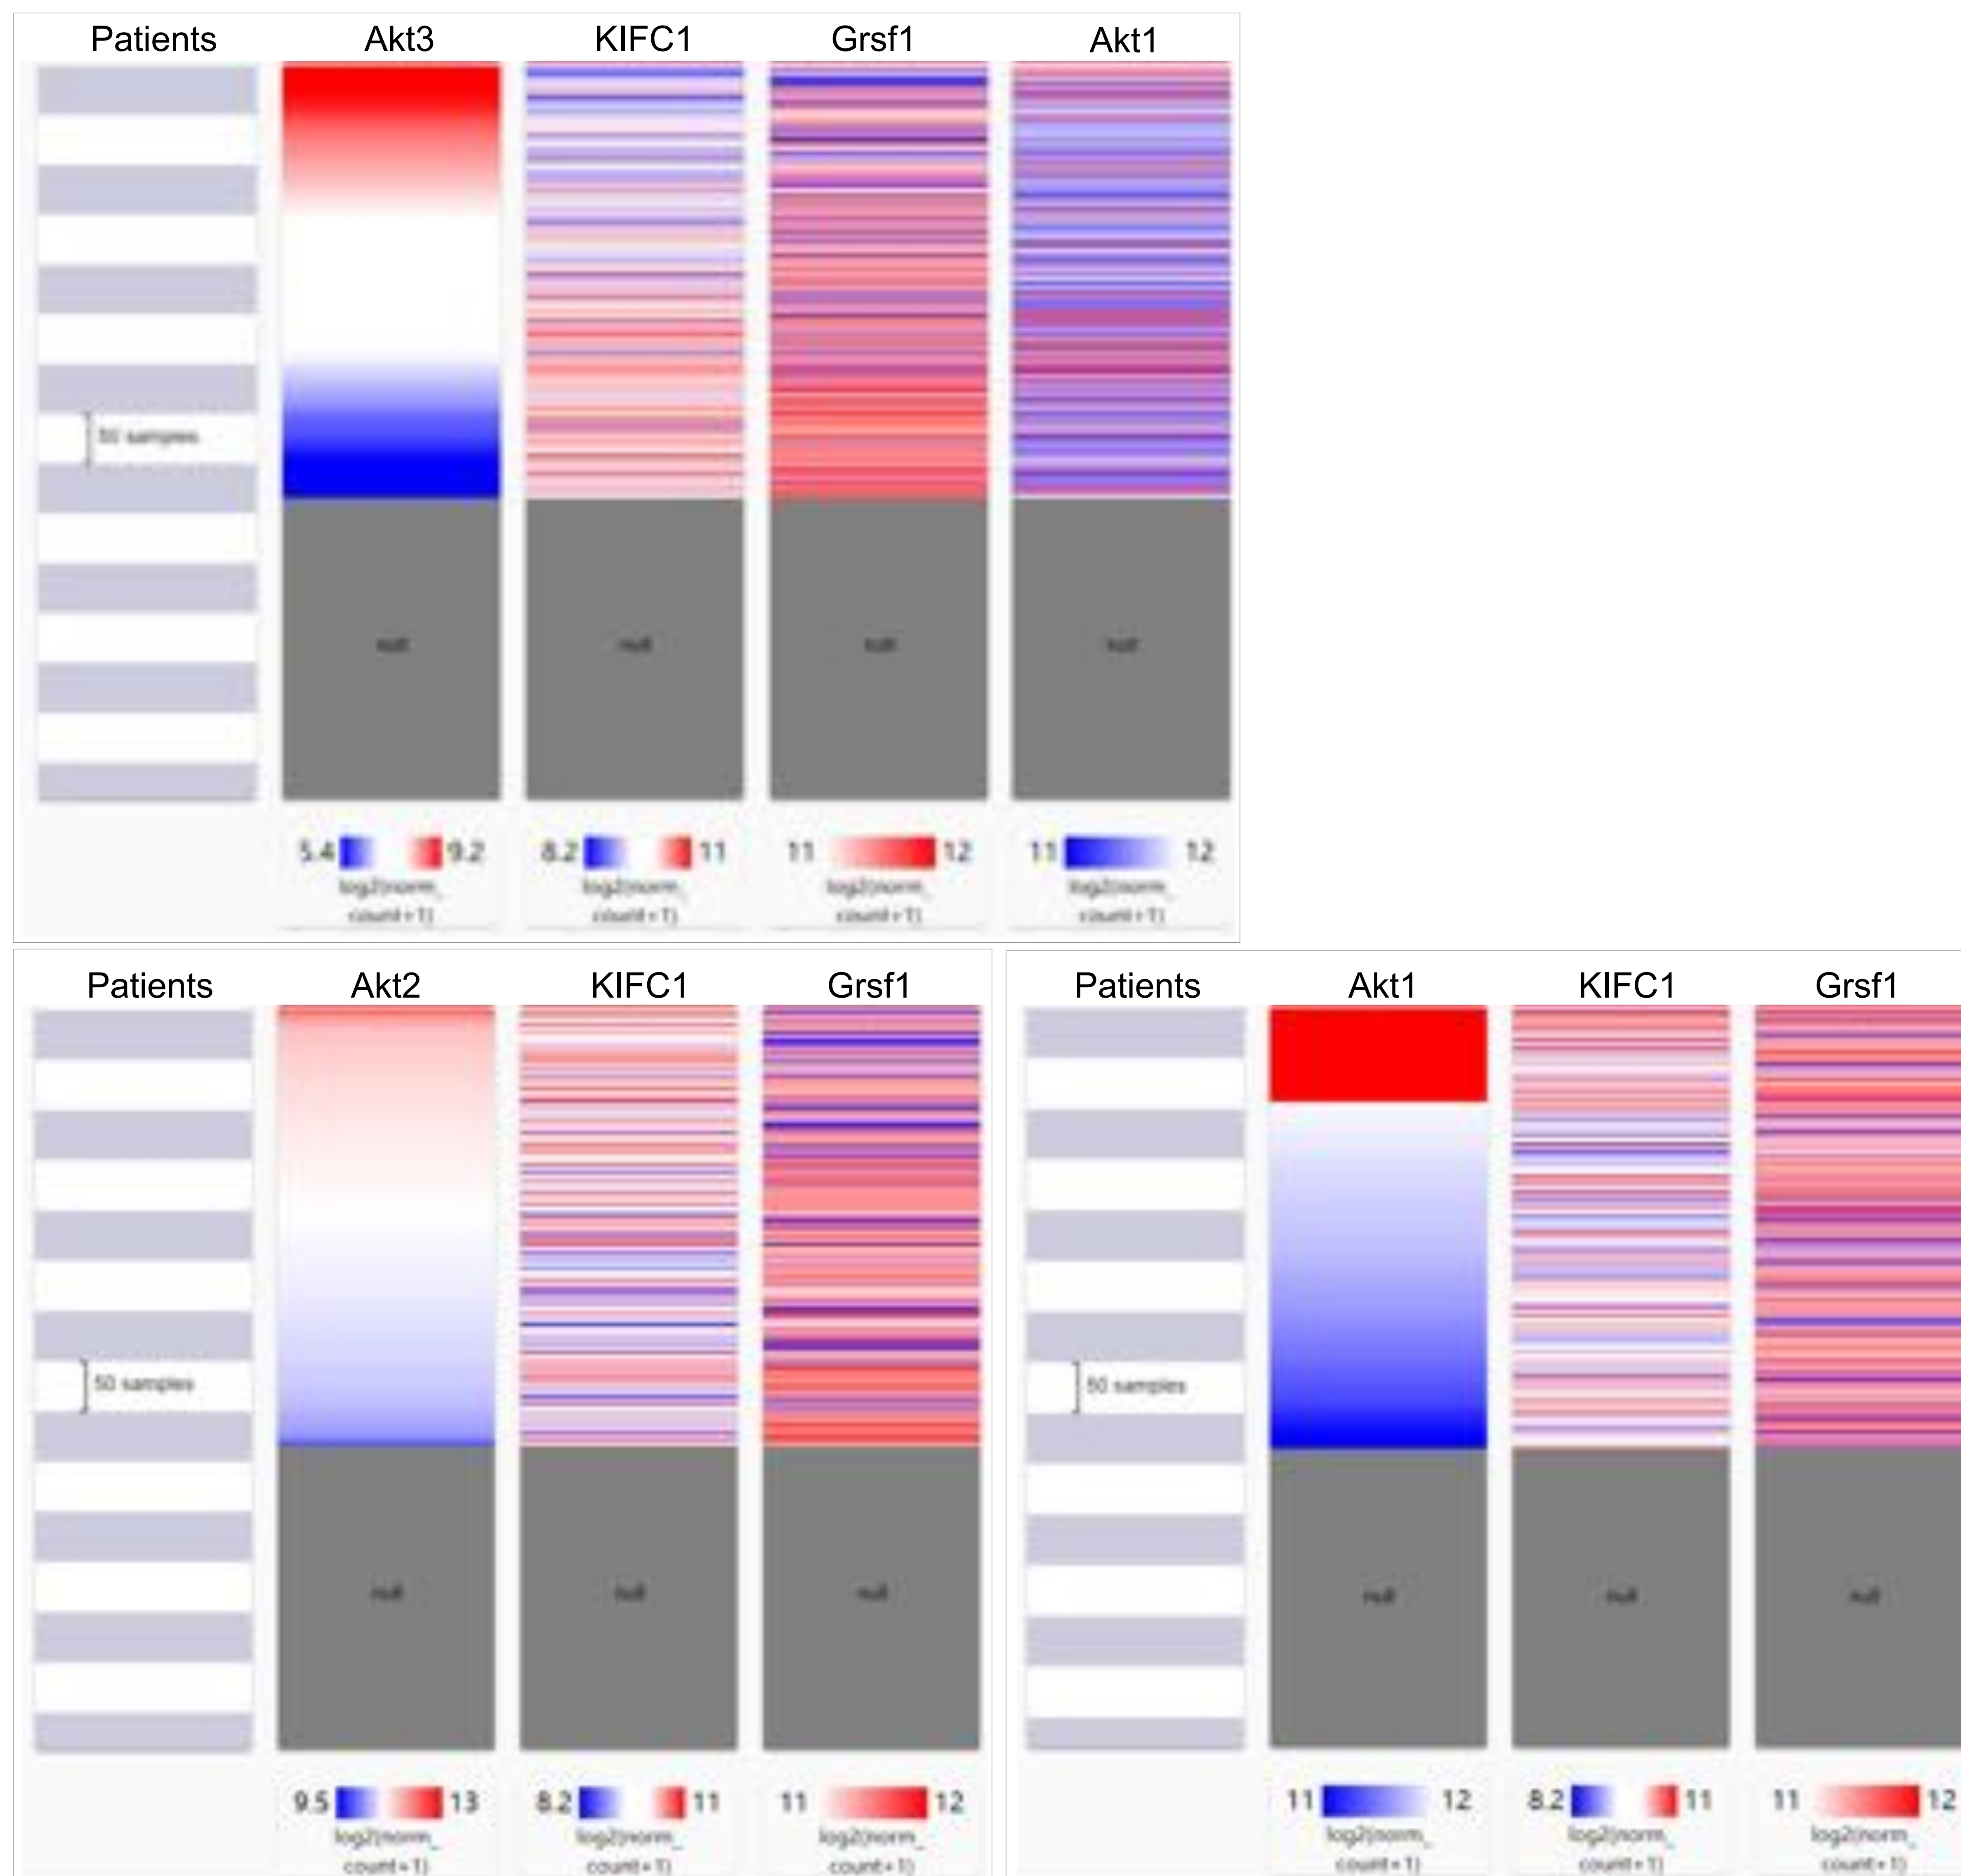

|                             | Akt3    |         |             | Akt2   |         | Akt1        |             |
|-----------------------------|---------|---------|-------------|--------|---------|-------------|-------------|
|                             | KIFC1   | Grsf1   | Akt1        | KIFC1  | Grsf1   | KIFC1       | Grsf1       |
| <i>r-value</i>              | -0.3640 | -0.3467 | 0.08688     | 0.1553 | -0.2343 | 0.07418     | 0.03202     |
| <i>P-value (two tailed)</i> | <0.0001 | <0.0001 | 0.0706 (ns) | 0.0012 | <0.0001 | 0.1228 (ns) | 0.5058 (ns) |

Figure S21

GDC & TCGA melanoma database

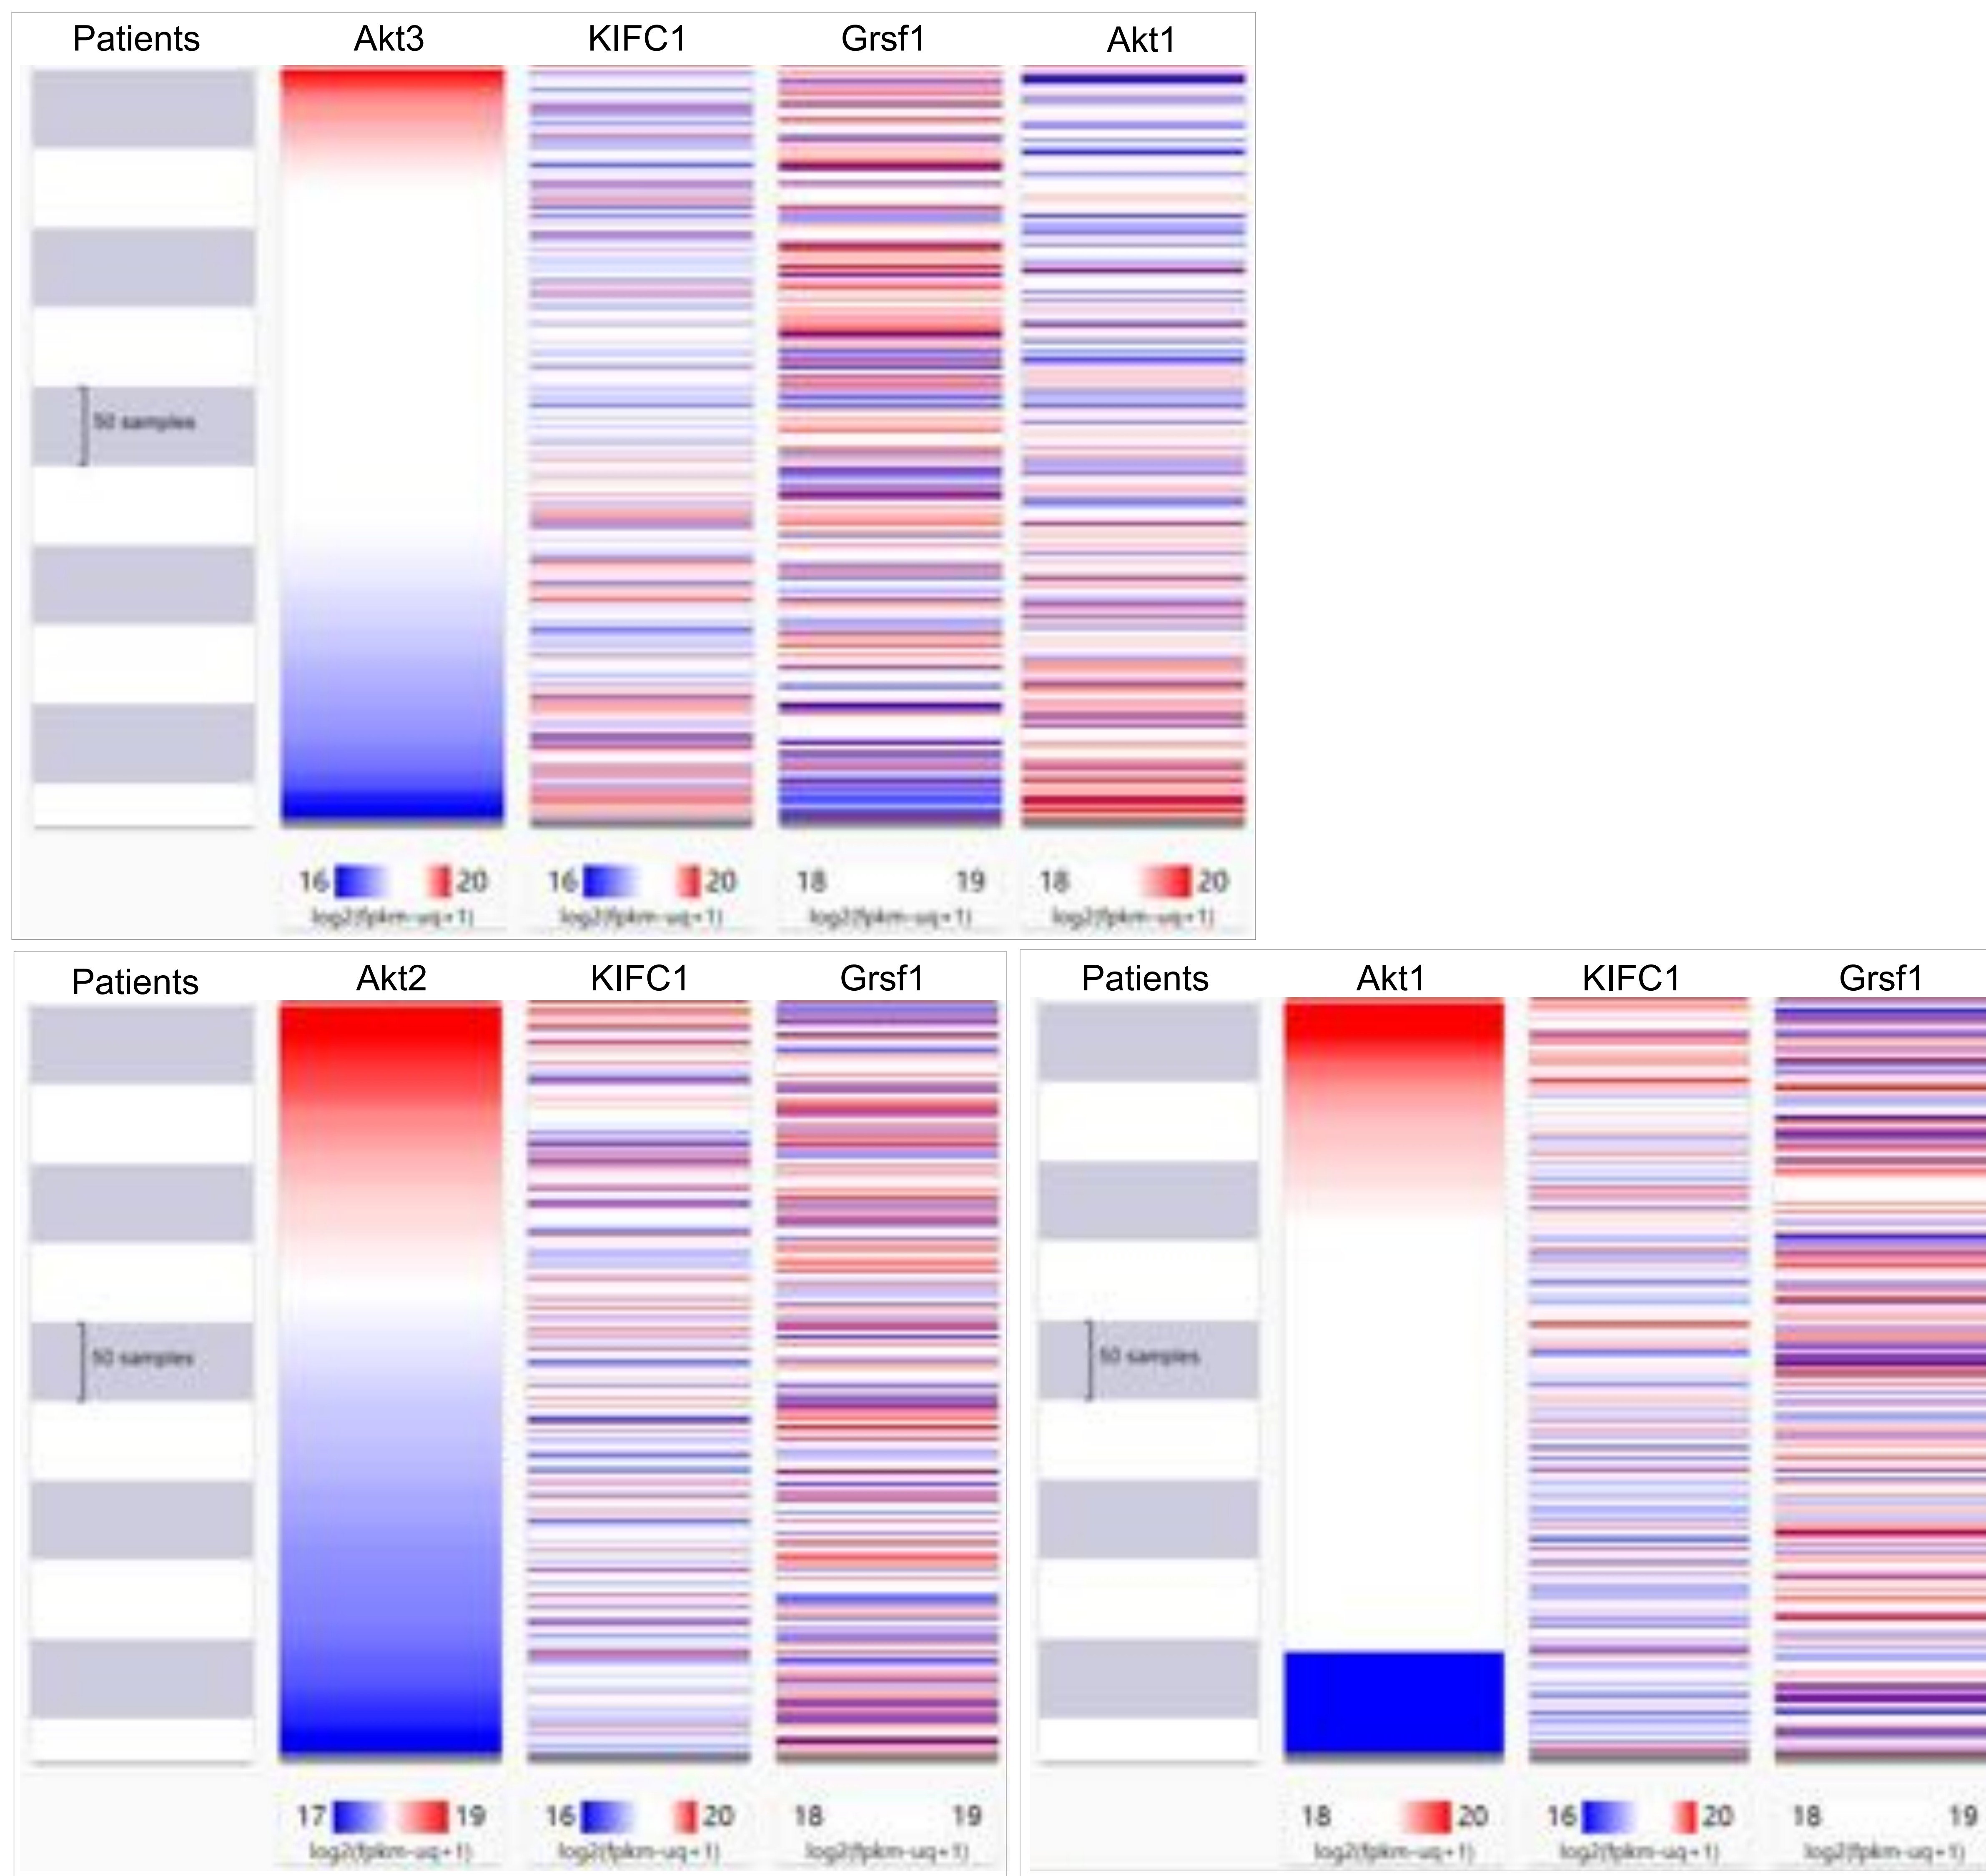

|                              | Akt3    |         |         | Akt2   |             | Akt1    |             |
|------------------------------|---------|---------|---------|--------|-------------|---------|-------------|
|                              | KIFC1   | Grsf1   | Akt1    | KIFC1  | Grsf1       | KIFC1   | Grsf1       |
| <i>r</i> -value              | -0.1696 | 0.2069  | -0.3300 | 0.1751 | -0.04888    | 0.2569  | -0.07167    |
| <i>P</i> -value (two tailed) | 0.0002  | <0.0001 | <0.0001 | 0.0001 | 0.2892 (ns) | <0.0001 | 0.1200 (ns) |

**Figure S22**

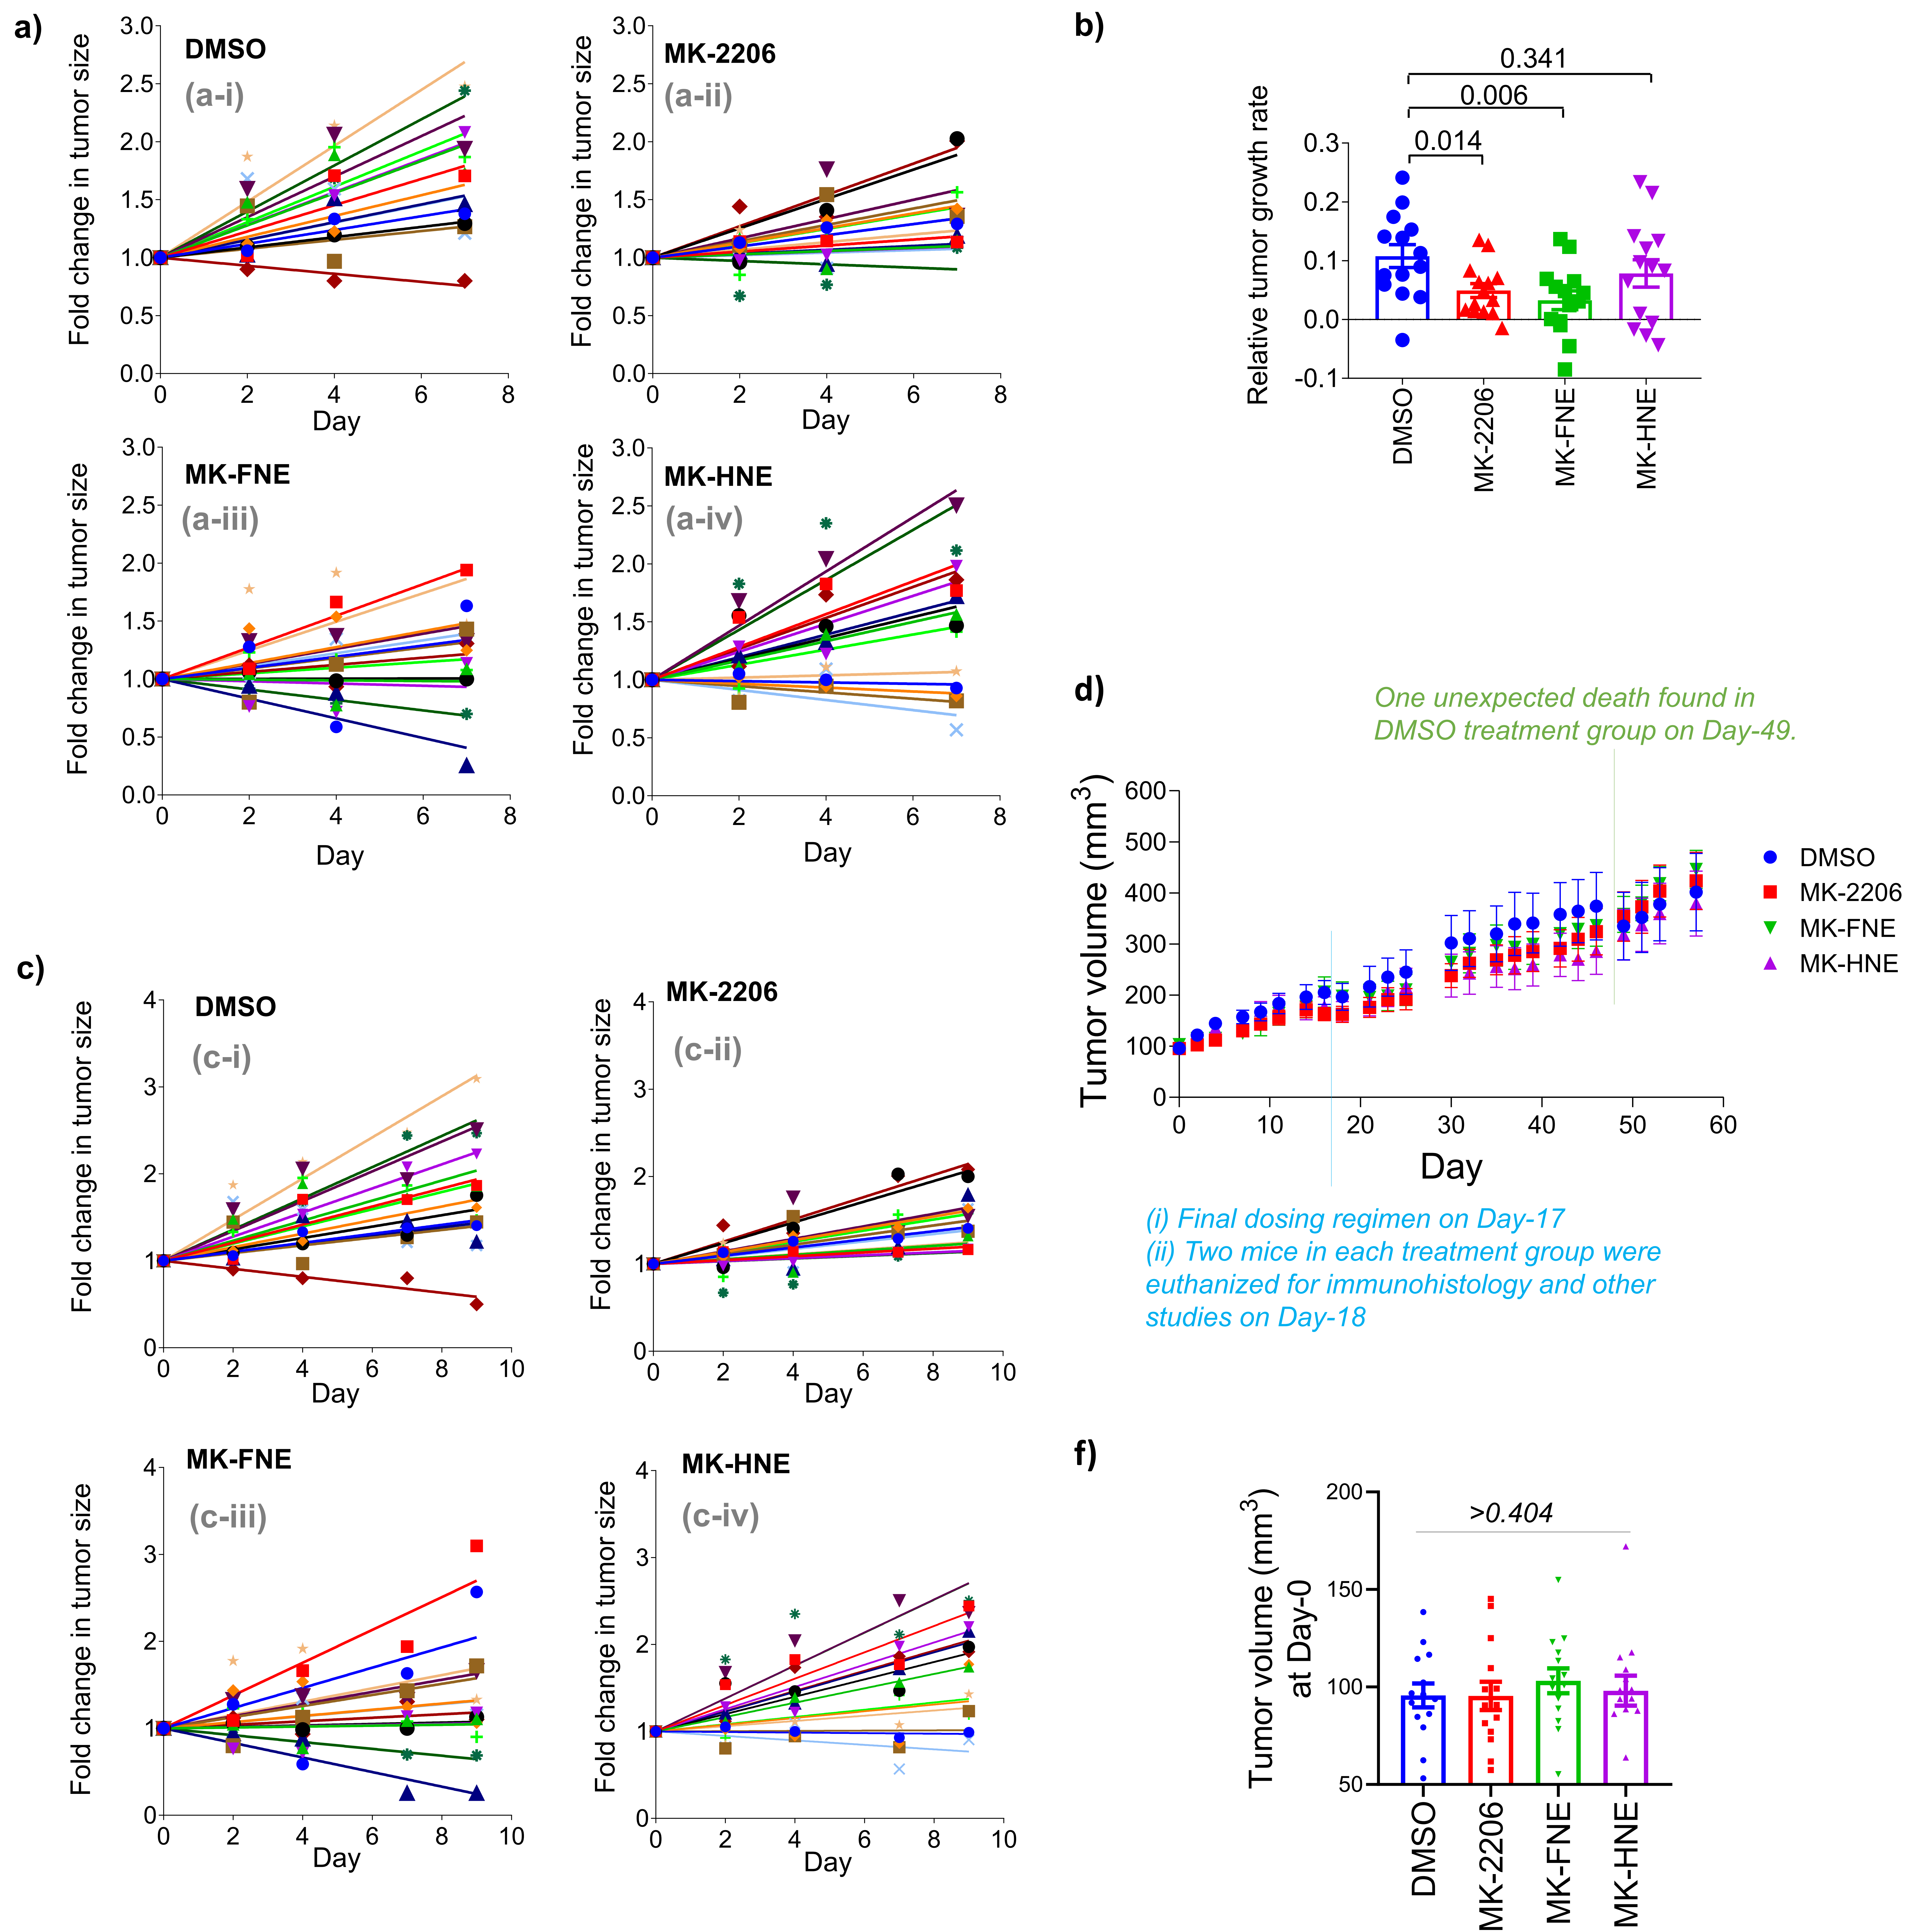

**Table S1**

Summary of the extrapolated  $EC_{50}$ s from cytotoxicity plots of **MK-FNE** and **MK-2206** against MDA-MB-468 cells transfected with Akt-isoform-targeting siRNA (n = 8, mean  $\pm$  s.e.m). See also **Figure 4b**. The selectivity of **MK-FNE** is calculated according to the indicated equation.

|                                                 | siCont-1      | siCont-2       | siCont-3      | siAkt1-1      | siAkt1-2      | siAkt2-1      | siAkt2-2      | siAkt2-3      | siAkt2-4      | siAkt2-5      | siAkt3-1      | siAkt3-2      |
|-------------------------------------------------|---------------|----------------|---------------|---------------|---------------|---------------|---------------|---------------|---------------|---------------|---------------|---------------|
| <b><math>EC_{50}</math><br/>(MK-2206)</b>       | 2.2 $\pm$ 0.2 | 3.3 $\pm$ 0.2  | 3.1 $\pm$ 0.4 | 1.1 $\pm$ 0.1 | 0.3 $\pm$ 0.1 | 1.1 $\pm$ 0.1 | 4.0 $\pm$ 0.4 | 1.7 $\pm$ 0.3 | 2.8 $\pm$ 0.4 | 3.0 $\pm$ 0.5 | 1.1 $\pm$ 0.1 | 1.3 $\pm$ 0.1 |
| <b><math>EC_{50}</math><br/>(MK-FNE)</b>        | 8.7 $\pm$ 0.7 | 10.0 $\pm$ 1.0 | 9.7 $\pm$ 2.5 | 8.2 $\pm$ 0.7 | 2.3 $\pm$ 0.4 | 4.7 $\pm$ 0.7 | 4.9 $\pm$ 1.4 | 7.1 $\pm$ 1.0 | 7.3 $\pm$ 1.0 | 8.1 $\pm$ 1.7 | 1.0 $\pm$ 0.3 | 1.2 $\pm$ 0.2 |
| <b>Fold<br/>increase<br/>in<br/>Selectivity</b> | -0.1          | 0.1            | 0.1           | -0.5          | -0.6          | -0.2          | 1.8           | -0.2          | 0.3           | 0.3           | 2.9           | 2.7           |

Equation:

$$\text{Fold increase in selectivity} = \frac{\left[ \frac{\langle (EC_{50})_{siCont} \rangle}{(EC_{50})_{siAkt(n)}} \right]_{MK-FNE}}{\left[ \frac{\langle (EC_{50})_{siCont} \rangle}{(EC_{50})_{siAkt(n)}} \right]_{MK-2206}} - 1$$

Where  $\langle (EC_{50})_{siCont} \rangle$  designates the average of a given compound's  $EC_{50}$ s against the two control knockdown lines;  $(EC_{50})_{siAkt(n)}$  is the given compound's  $EC_{50}$  against the indicated Akt isoform-specific knockdown line by siRNA.



**Table S2**

Cell cycle analysis

|              | DMSO | MK-2206          |                  | MK-HNE           |                  | MK-FNE           |                  | GDC0068          | GSK-690693       |
|--------------|------|------------------|------------------|------------------|------------------|------------------|------------------|------------------|------------------|
|              |      | EC <sub>60</sub> | EC <sub>80</sub> | EC <sub>60</sub> | EC <sub>80</sub> | EC <sub>60</sub> | EC <sub>80</sub> | EC <sub>60</sub> | EC <sub>60</sub> |
| <b>G1/G0</b> | 39.2 | 47.1             | 59.9             | 43.7             | 44.3             | 46.4             | 52.4             | 52.6             | 47.7             |
| <b>G2/M</b>  | 32.4 | 27.7             | 20.4             | 26.1             | 23.0             | 28.6             | 28.2             | 28.3             | 30.0             |
| <b>S</b>     | 22.2 | 23.7             | 18.6             | 27.4             | 22.1             | 23.0             | 16.6             | 12.1             | 14.3             |
| <b>subG0</b> | 0.8  | 0.5              | 0.7              | 1.3              | 9.7              | 0.9              | 1.8              | 1.6              | 0.9              |

## Related Manuscript File

- Additional replicates and full-view gels (pp 2-19)
- Log-plot of cytotoxic plots in Figure 4 (pp 20)
- Flow-cytometry analysis (pp 21-23) (related to Supplementary Table S2)

## Representative replicates related to data in Main Figure 1b-c

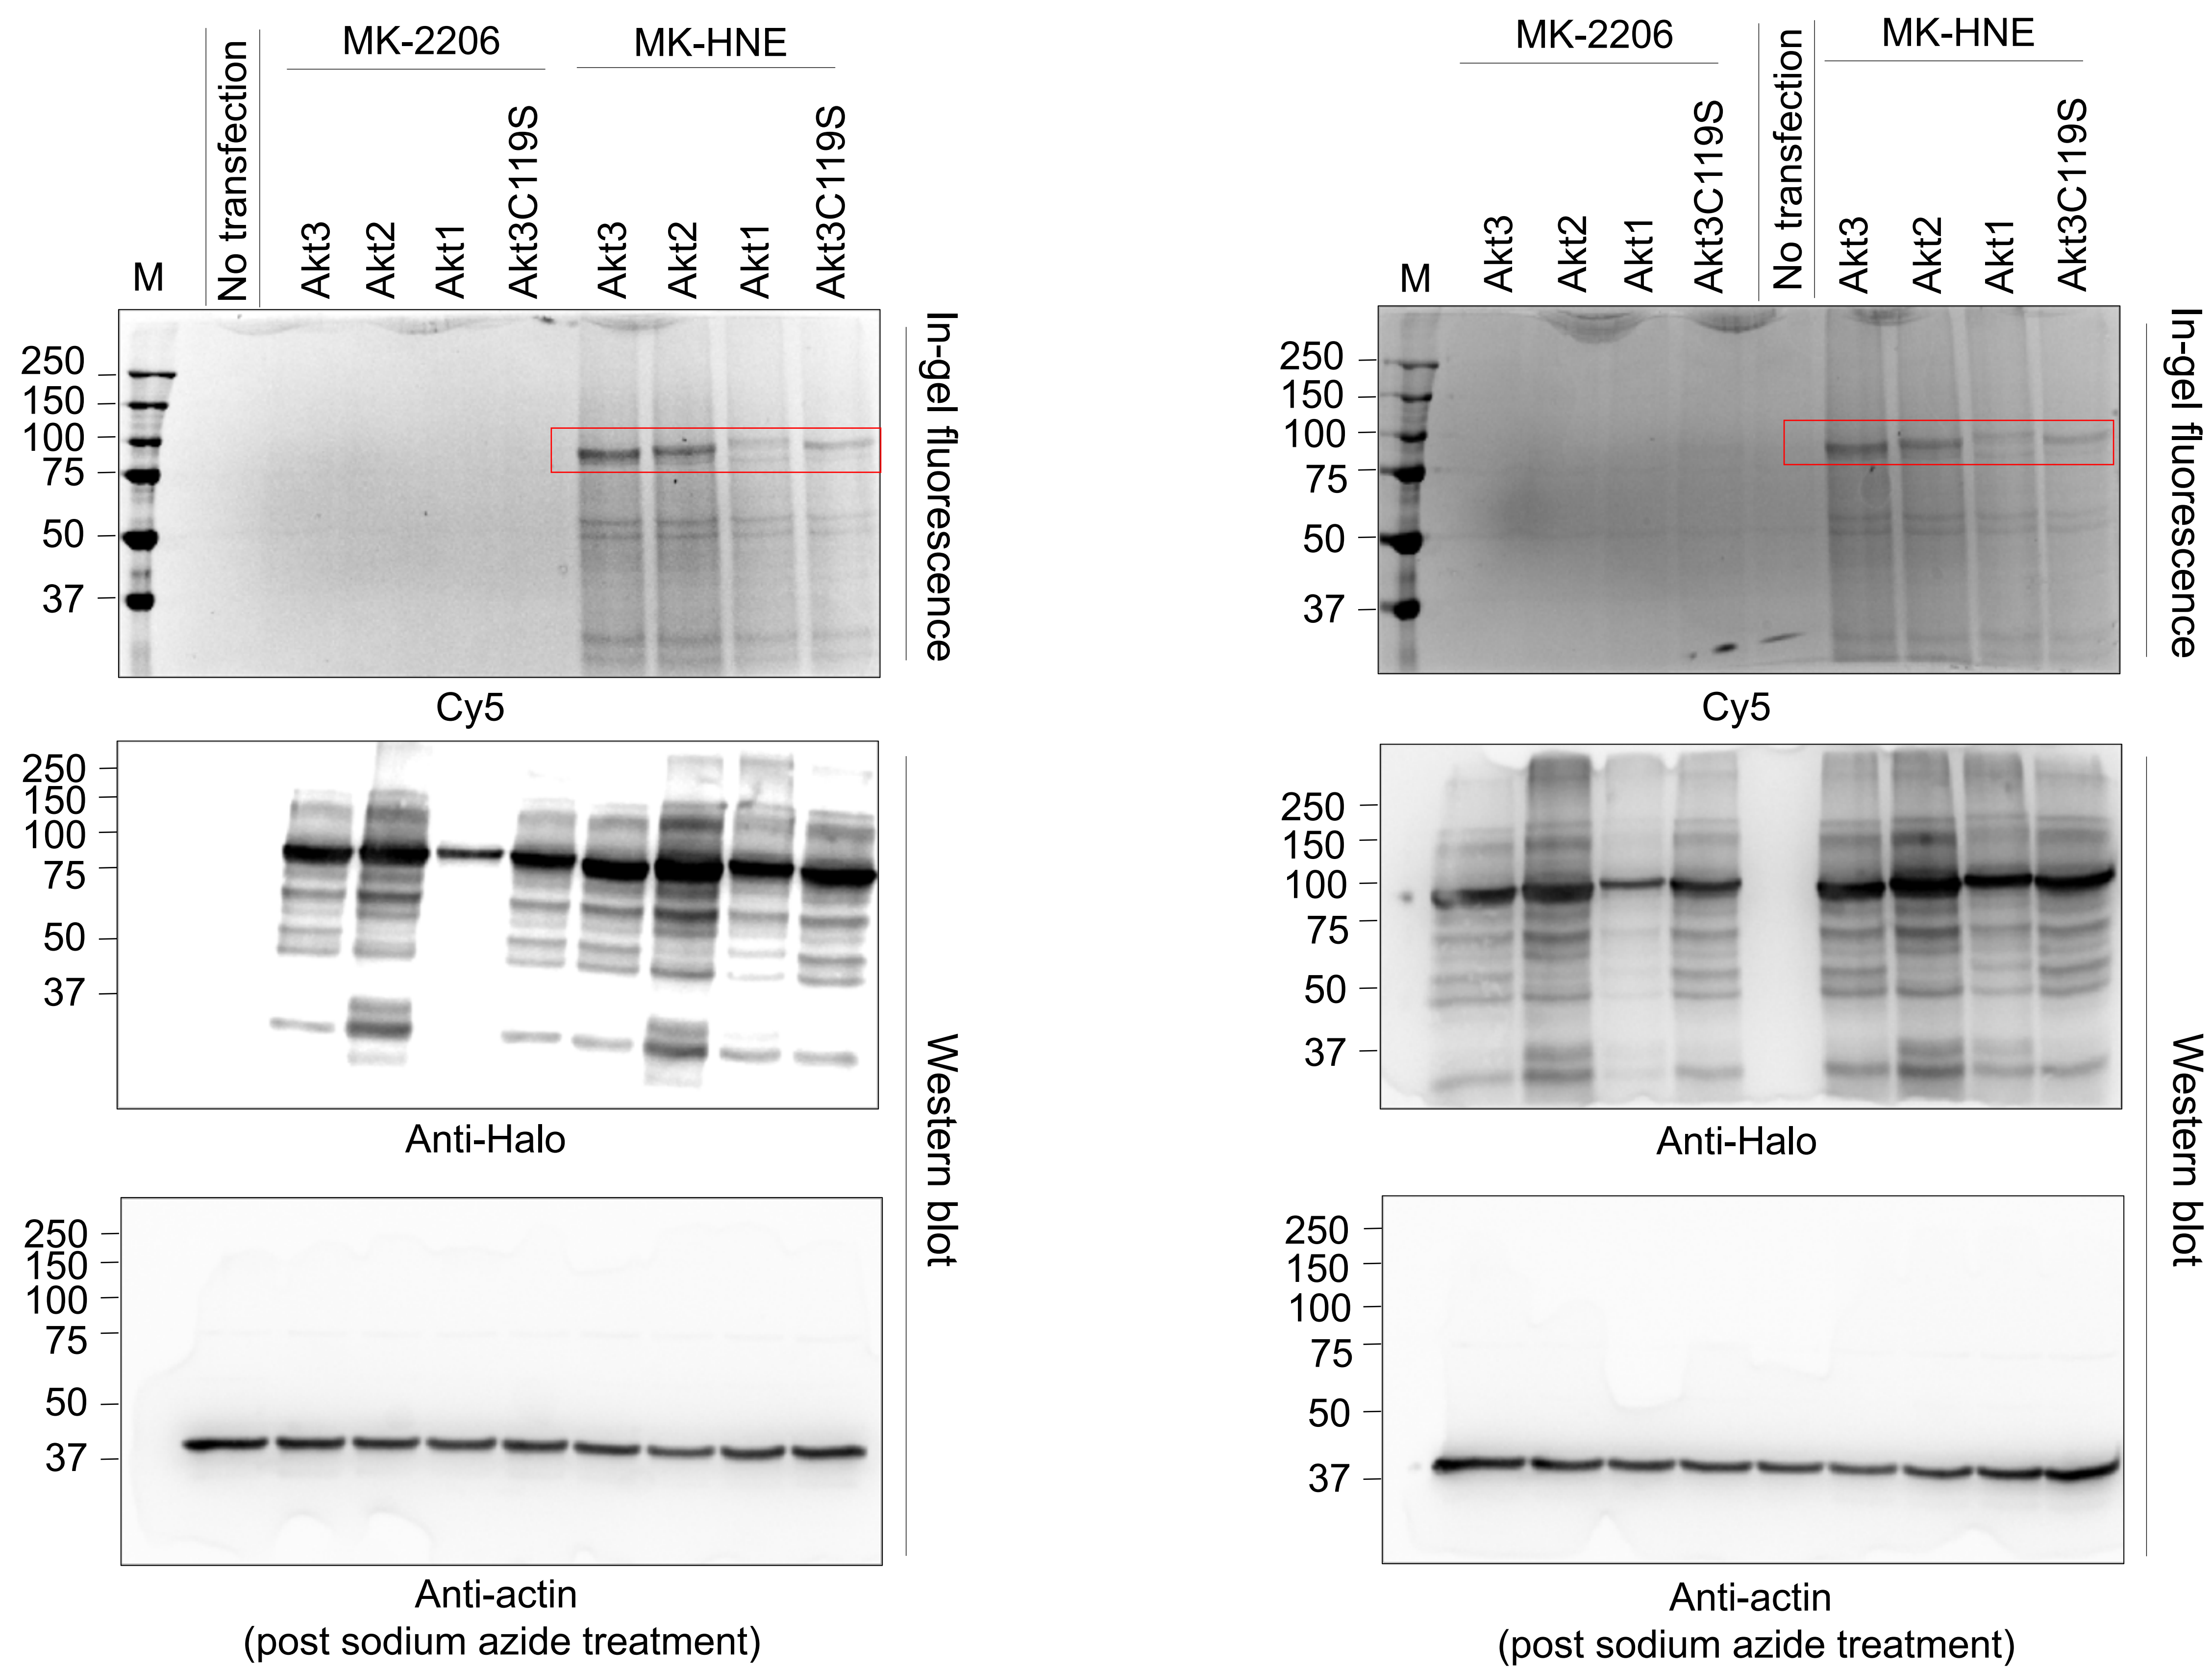

Note: Rectangular box indicates the Cy5 signal of Halo-Akt(n) used in the quantitation

## Representative replicates related to data in Main Figure 1b-c

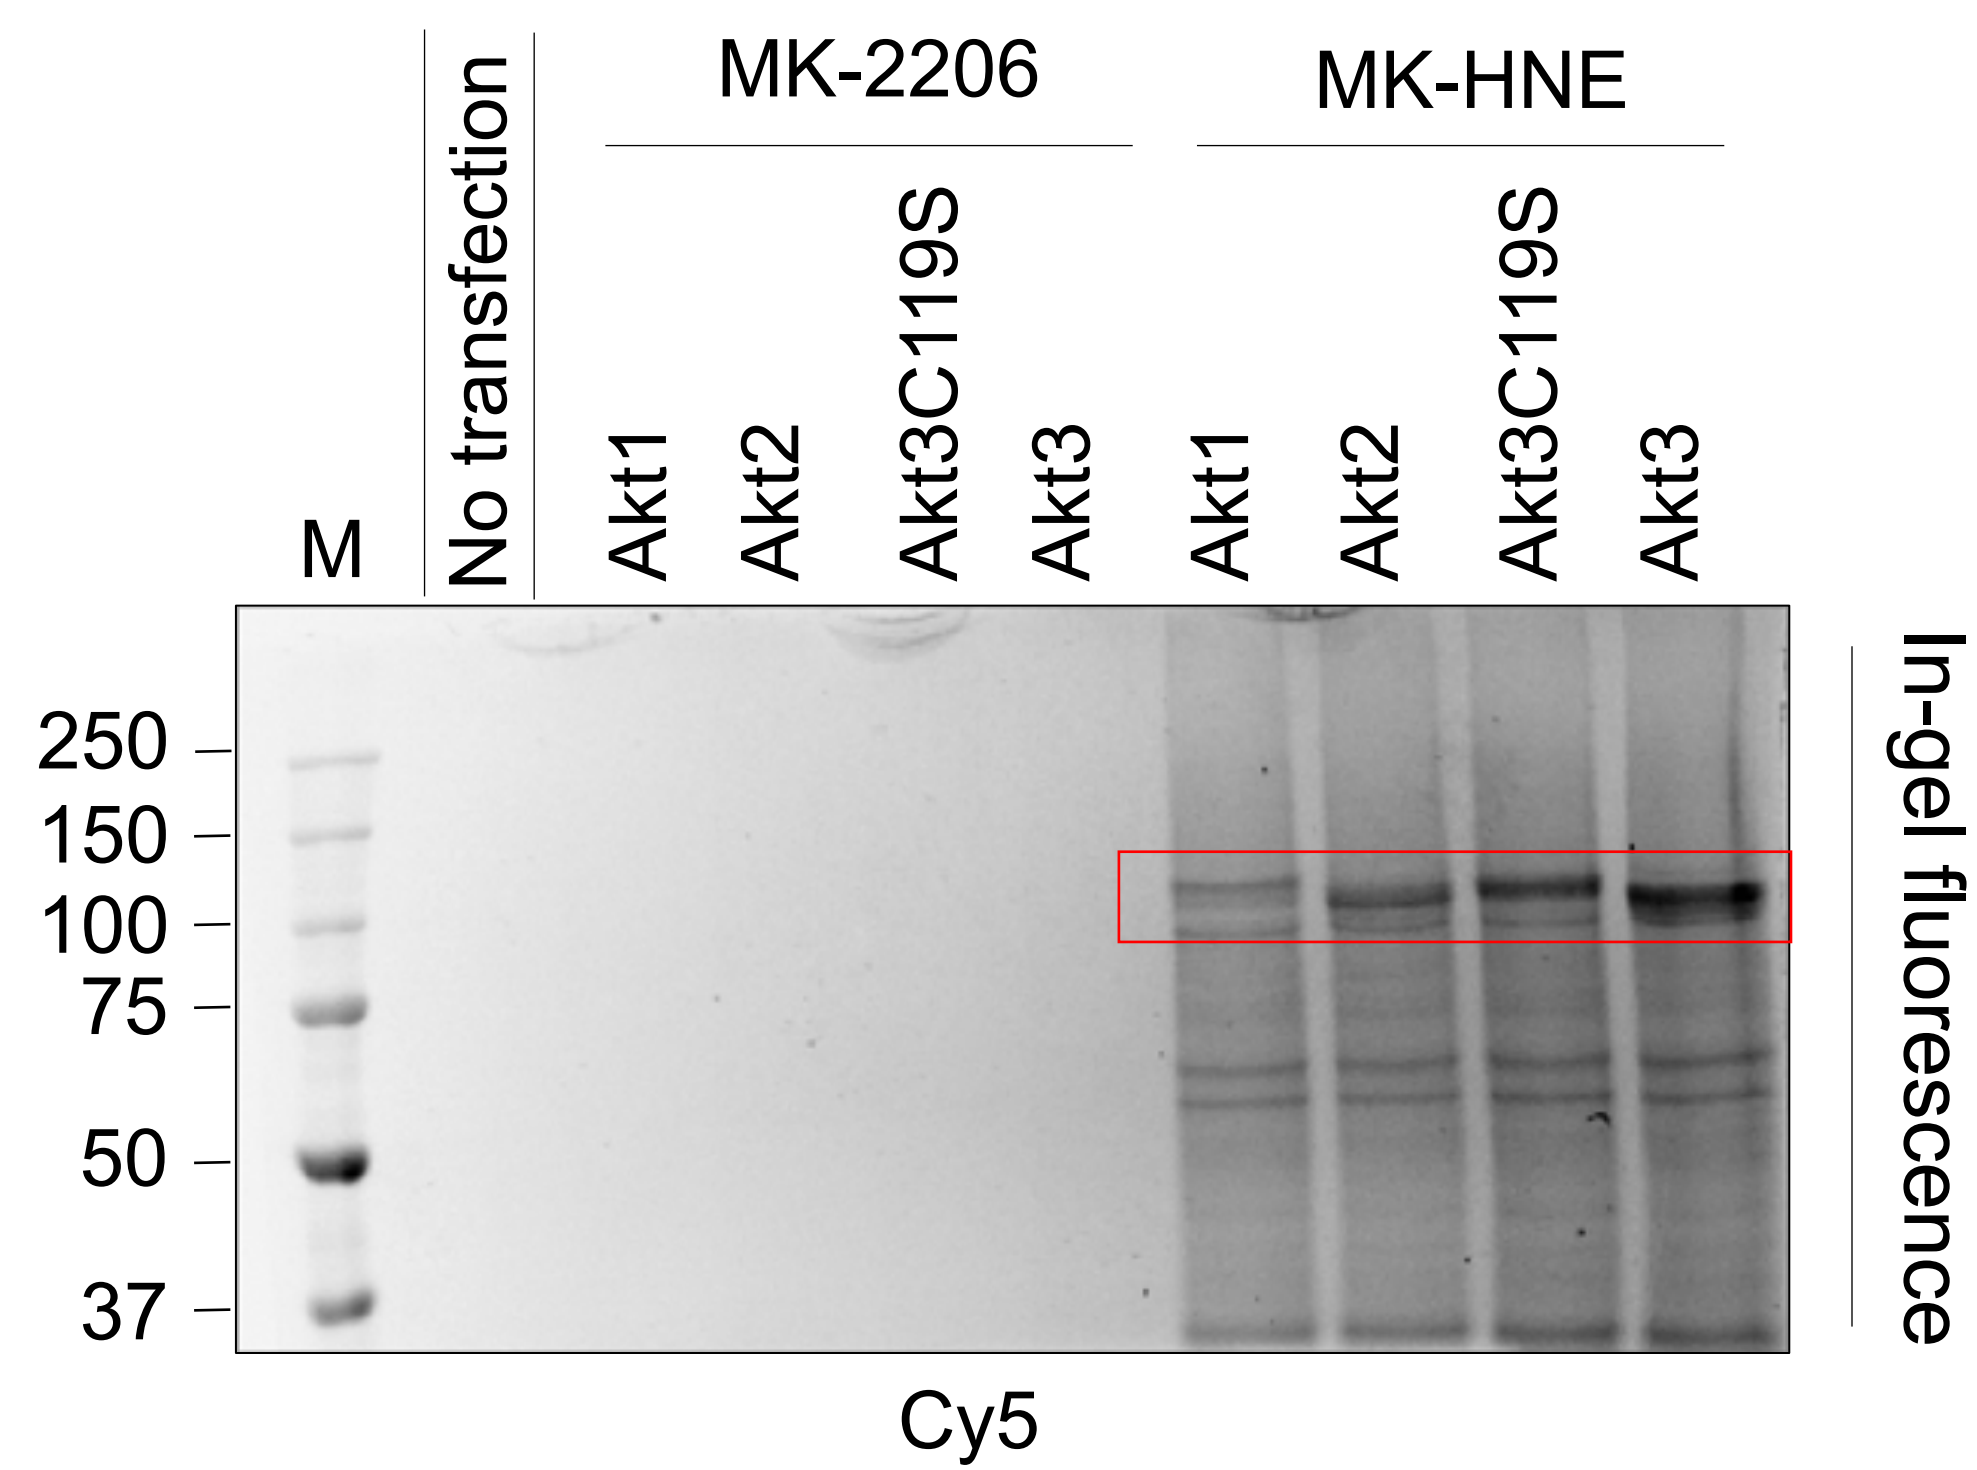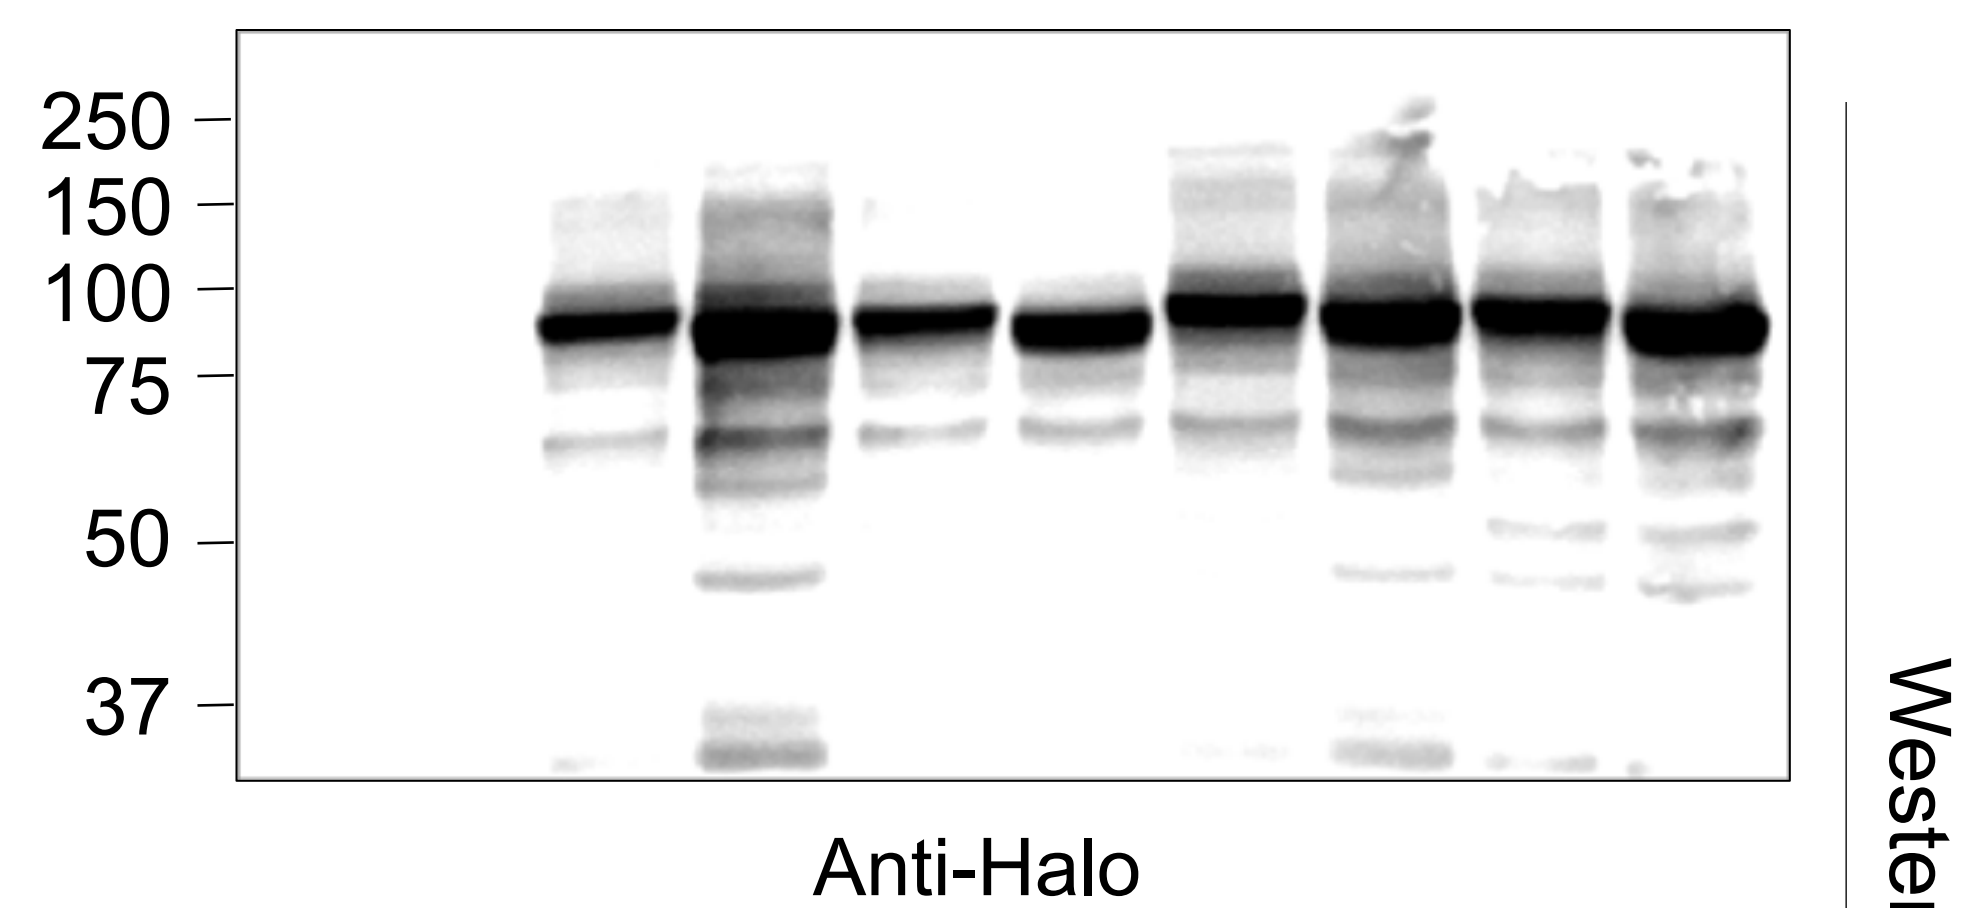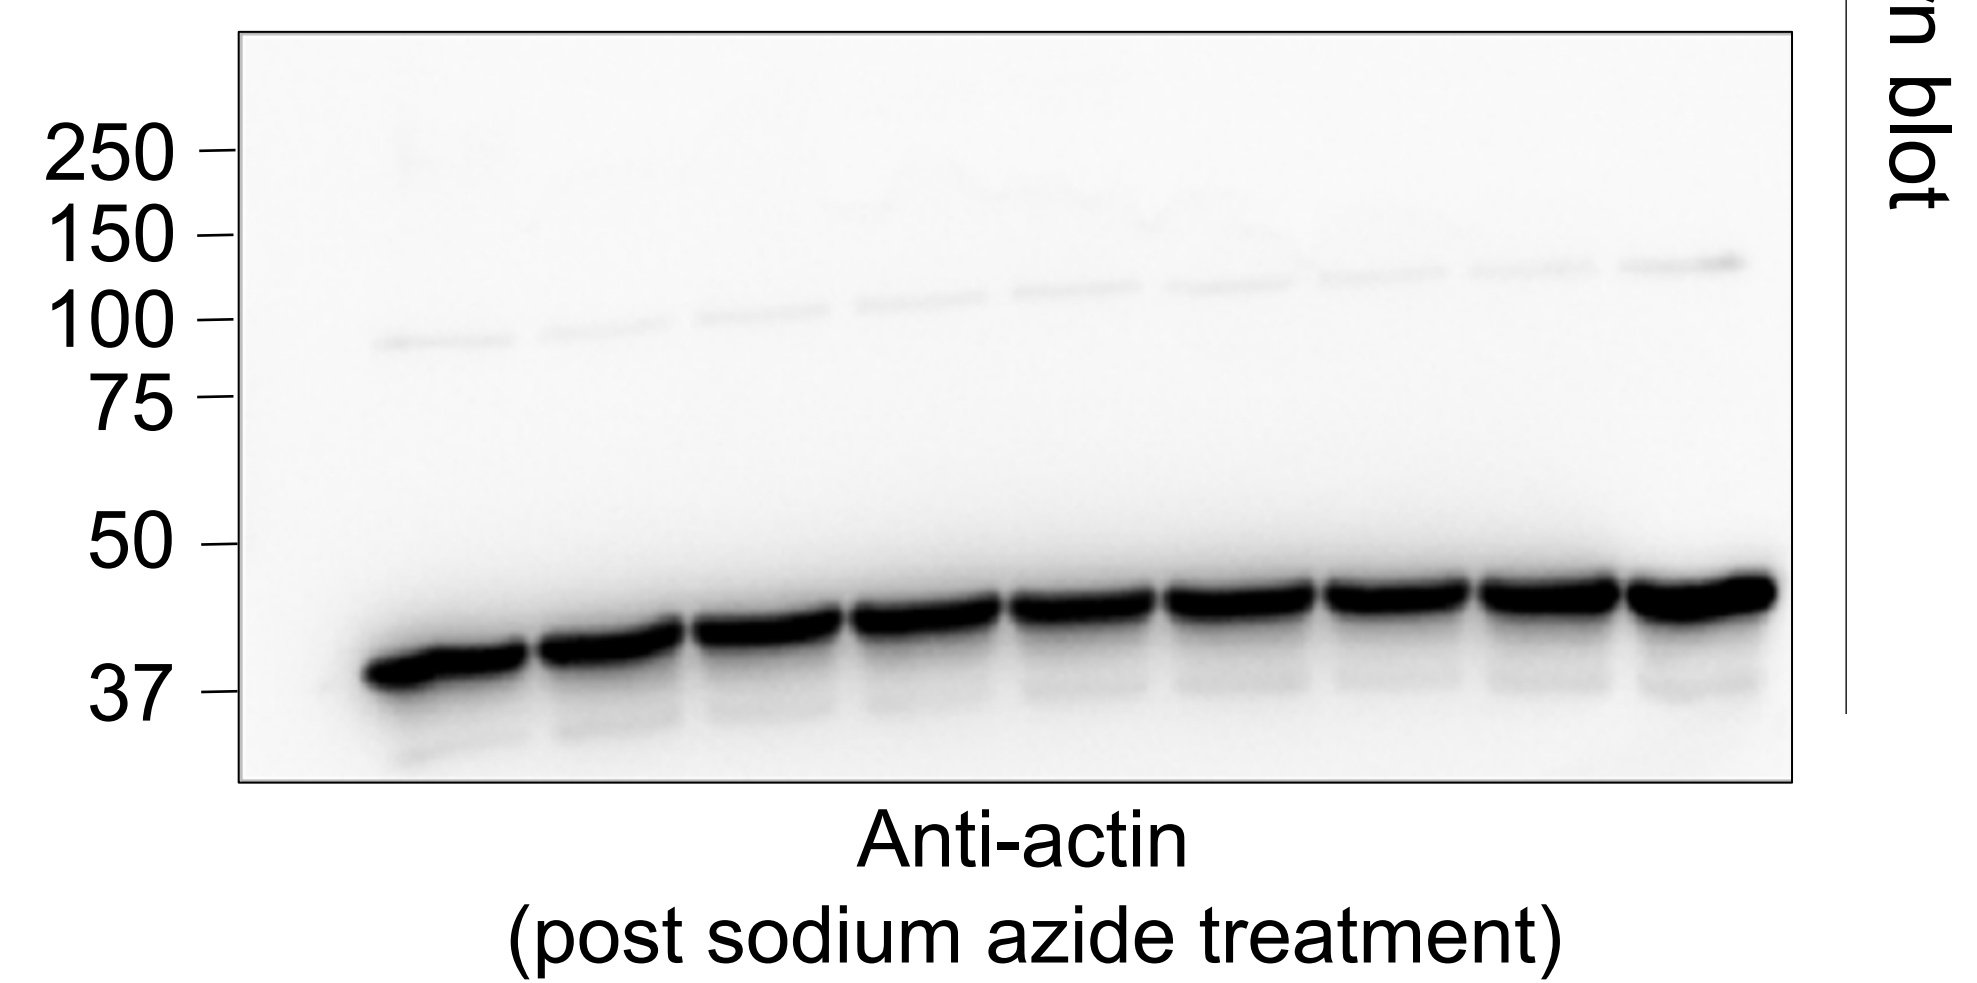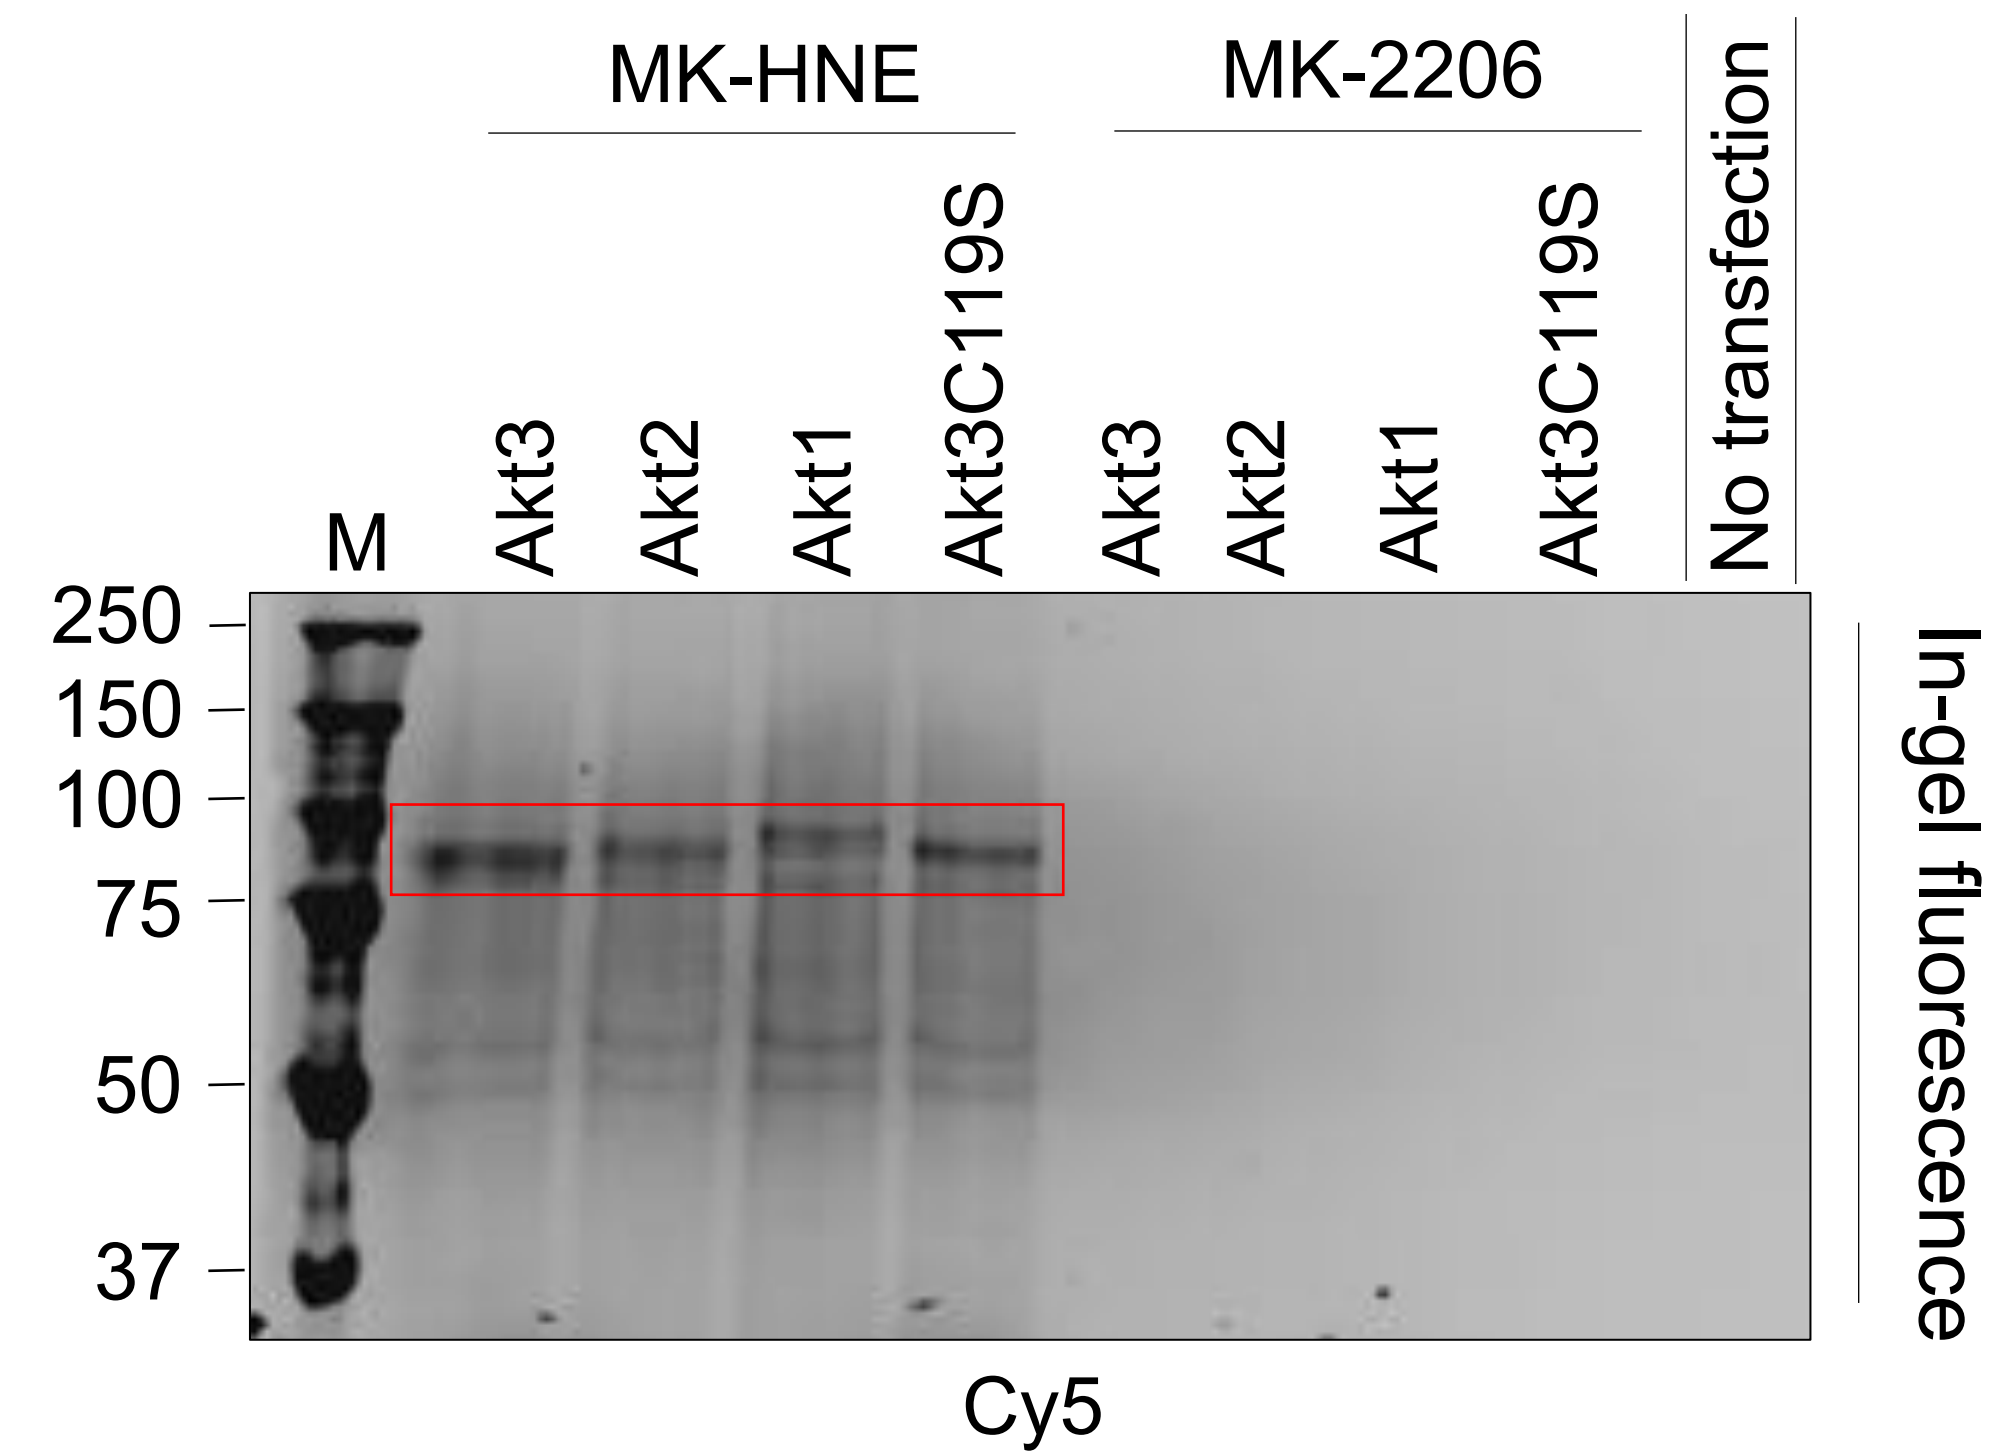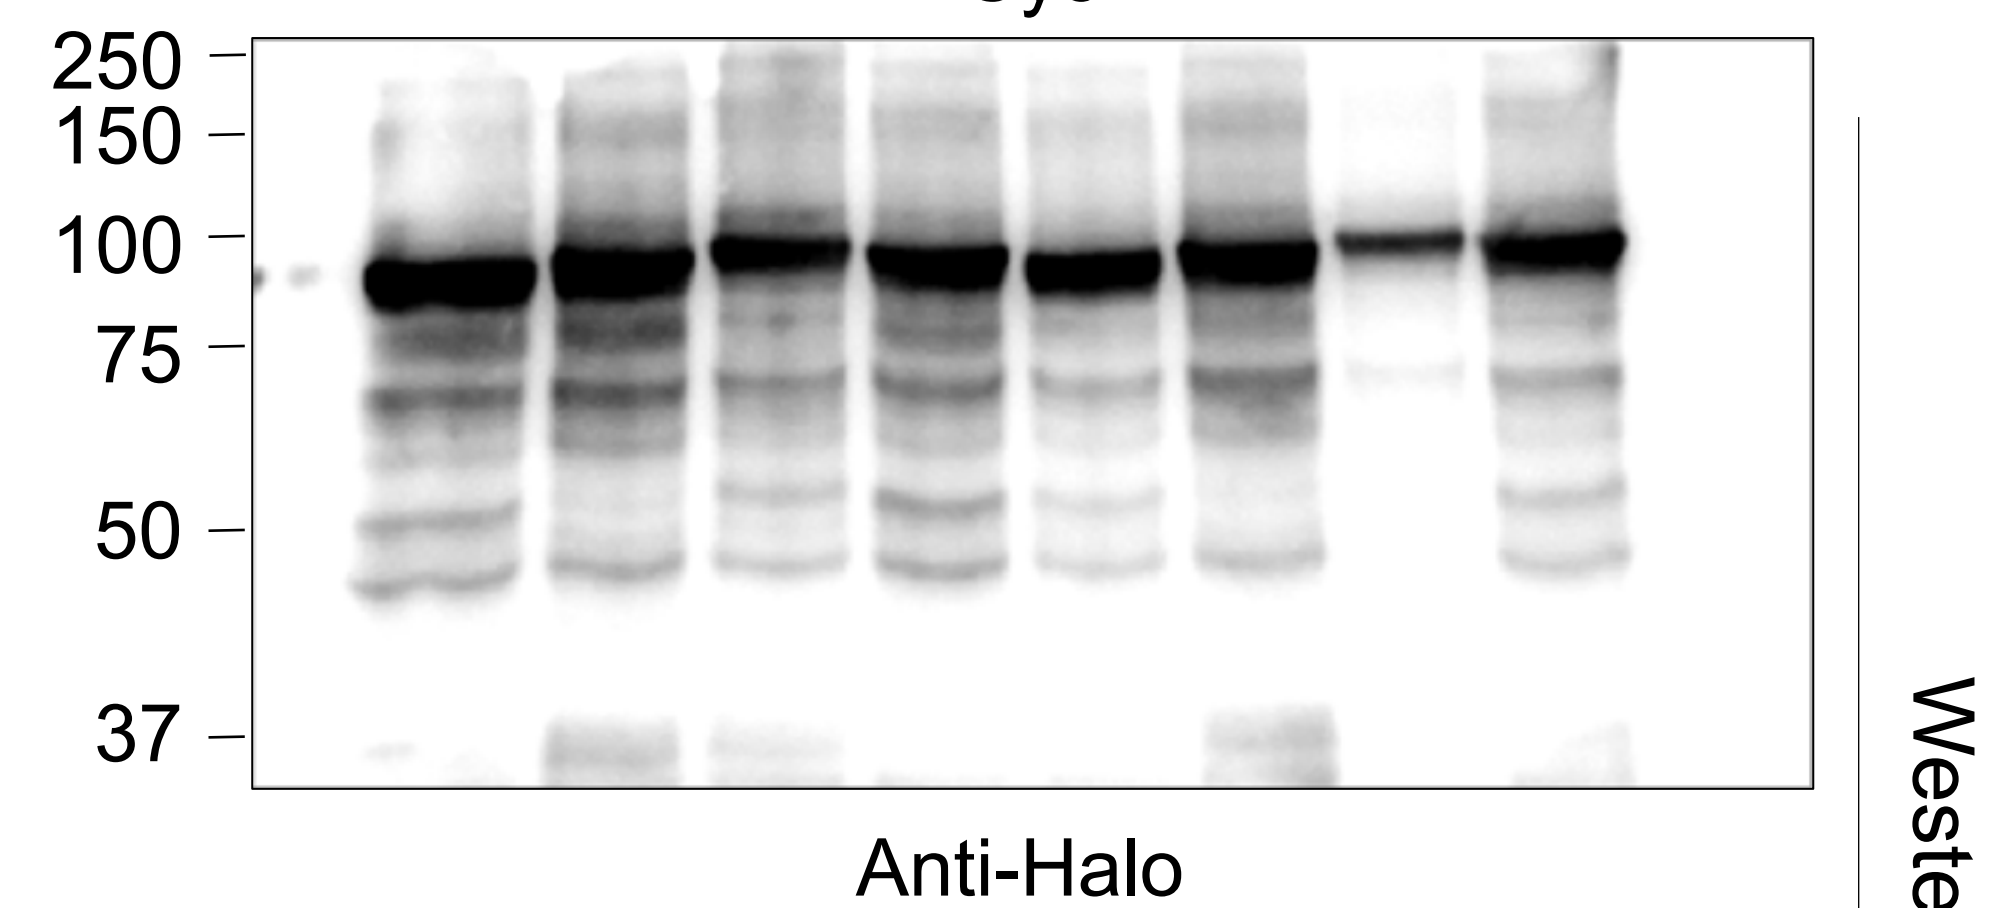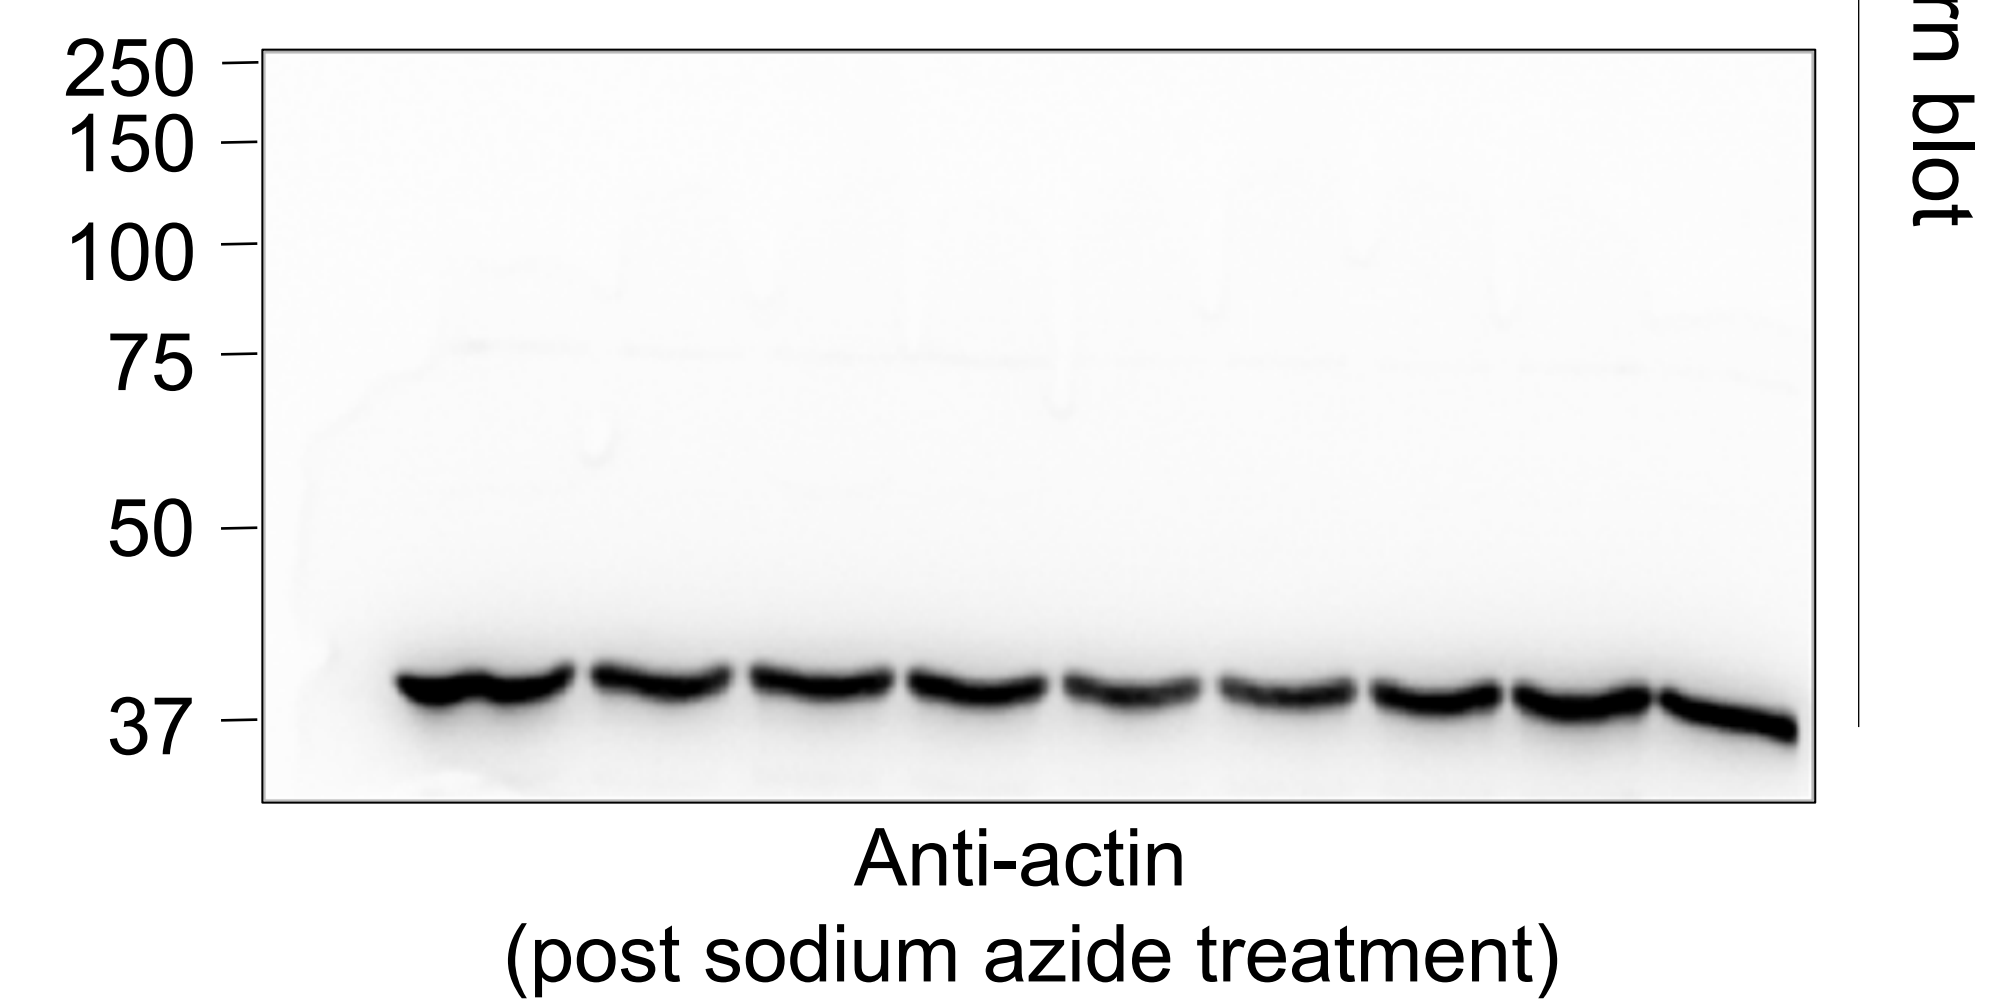

Note: Rectangular box indicates the Cy5 signal of Halo-Akt(n) used in the quantitation

**Representative replicates related to data in Supplemental Figure S1**

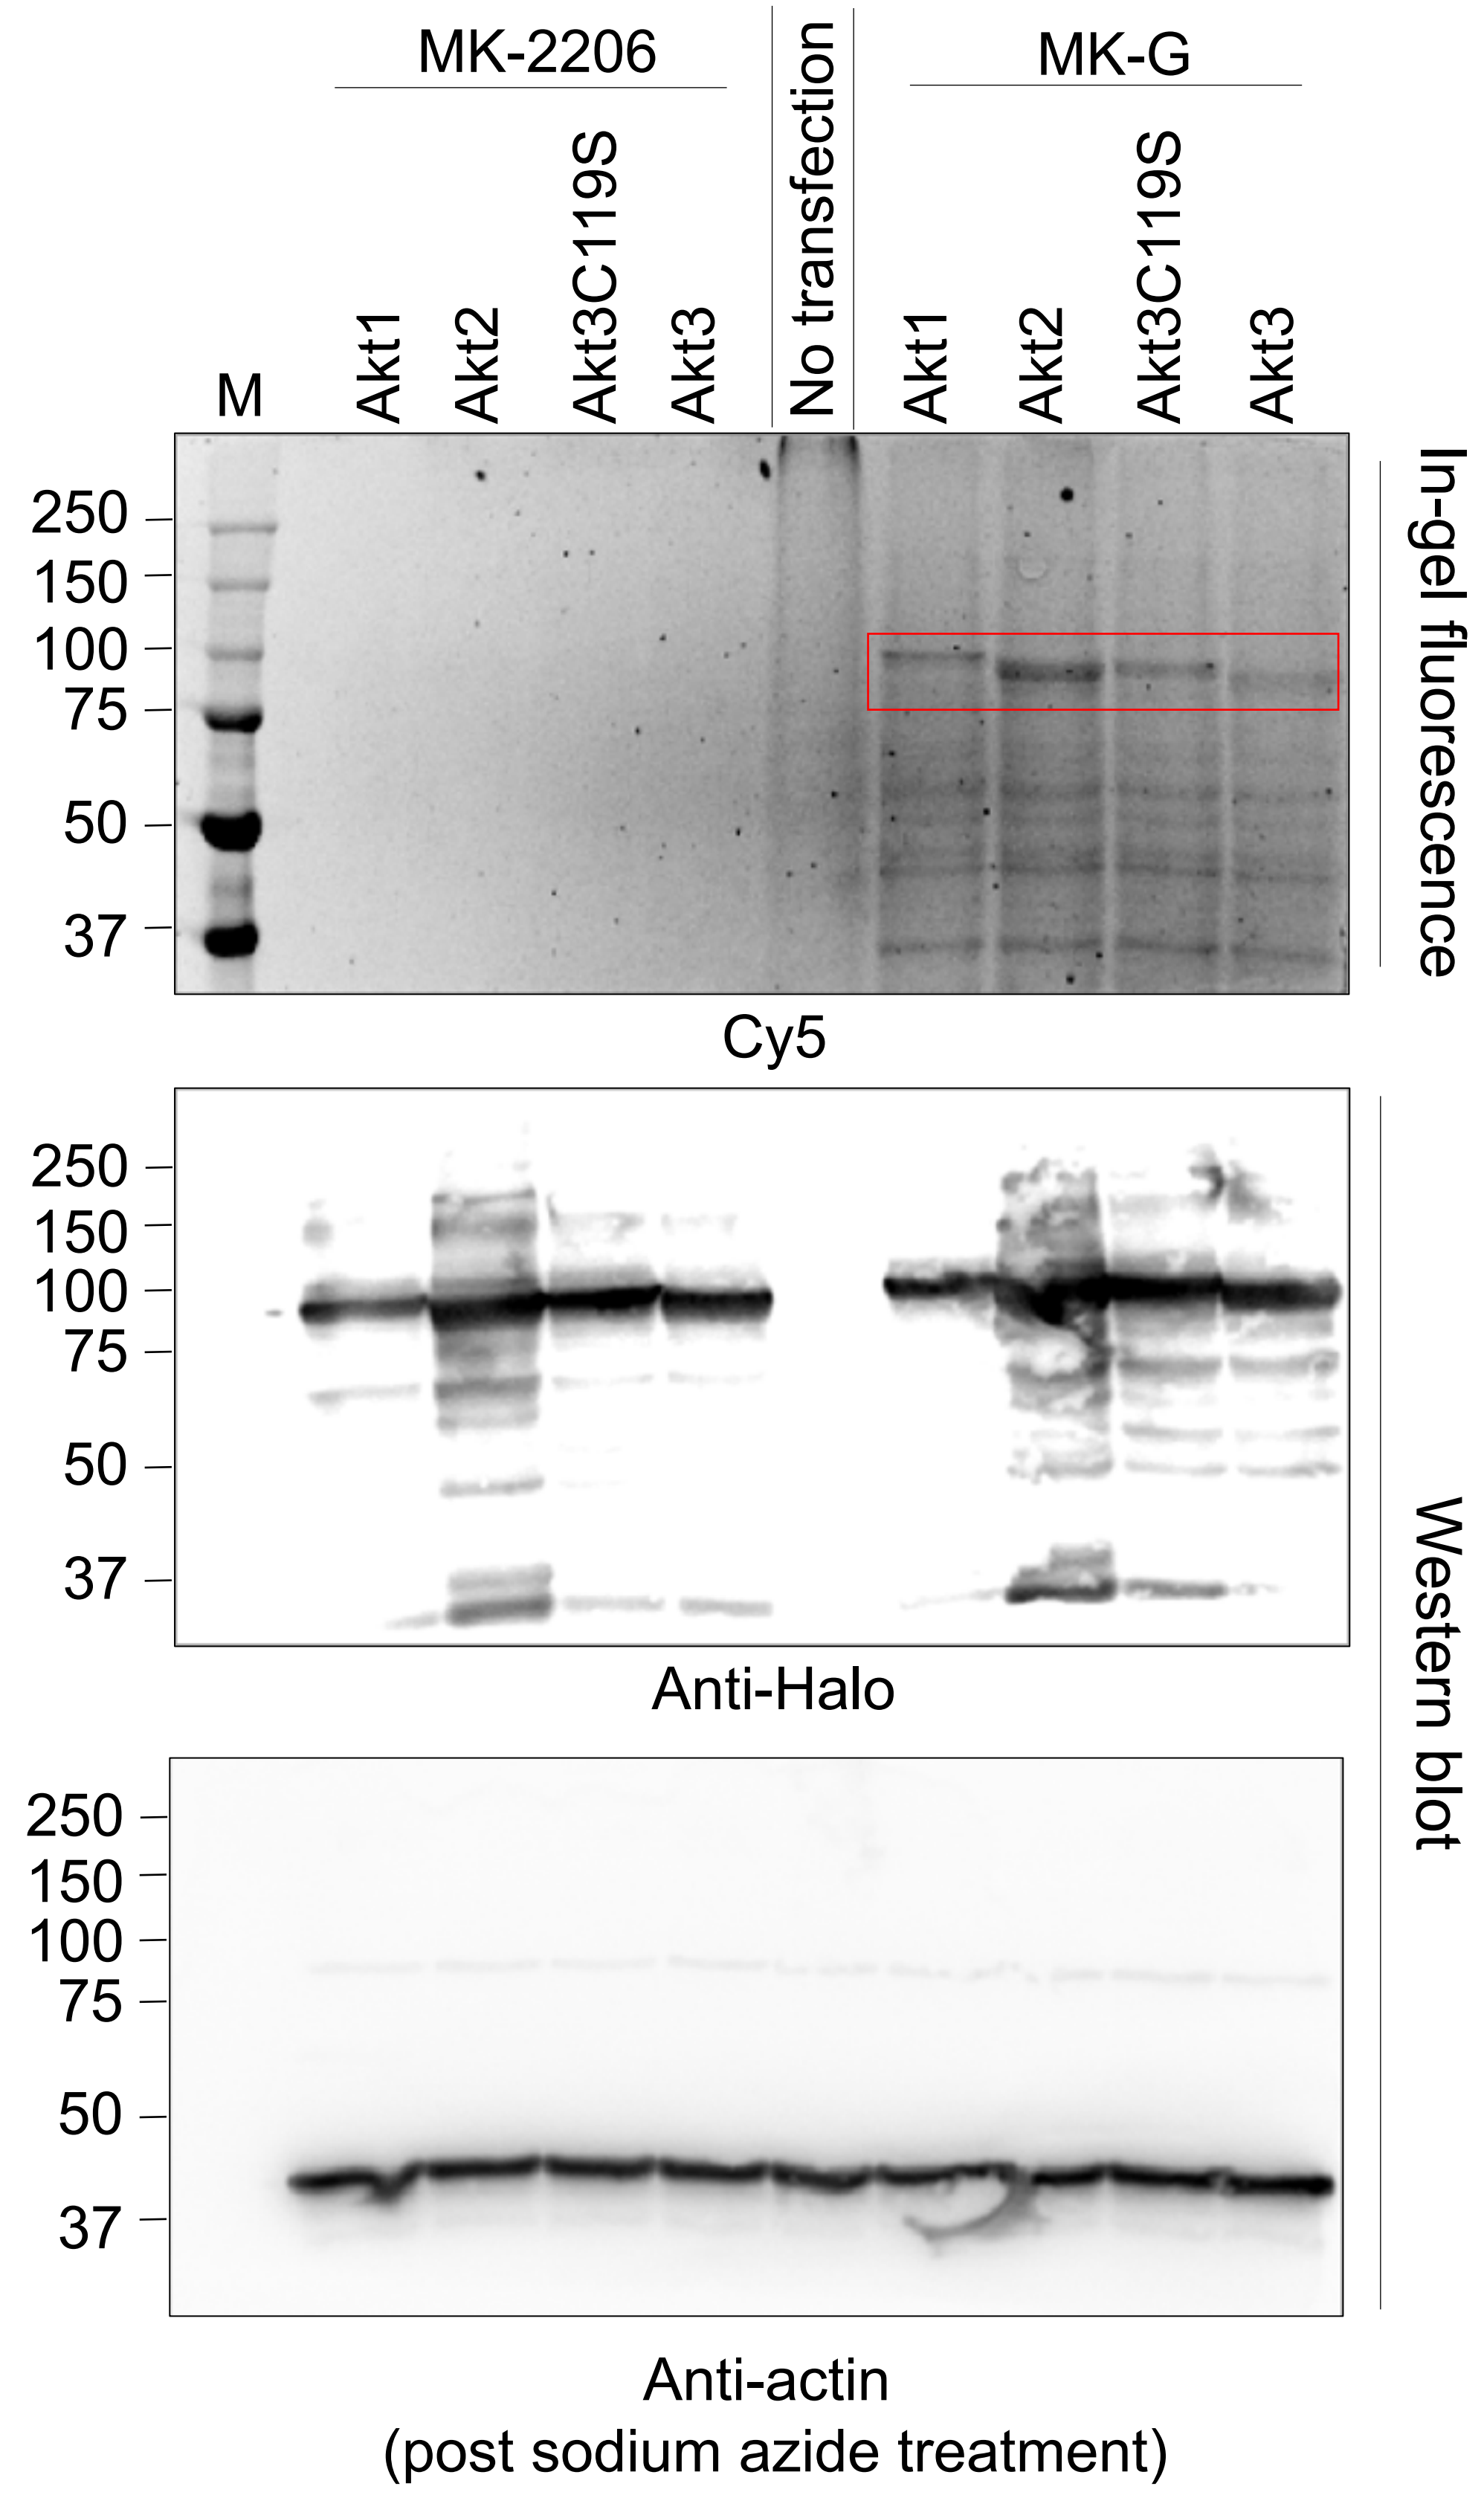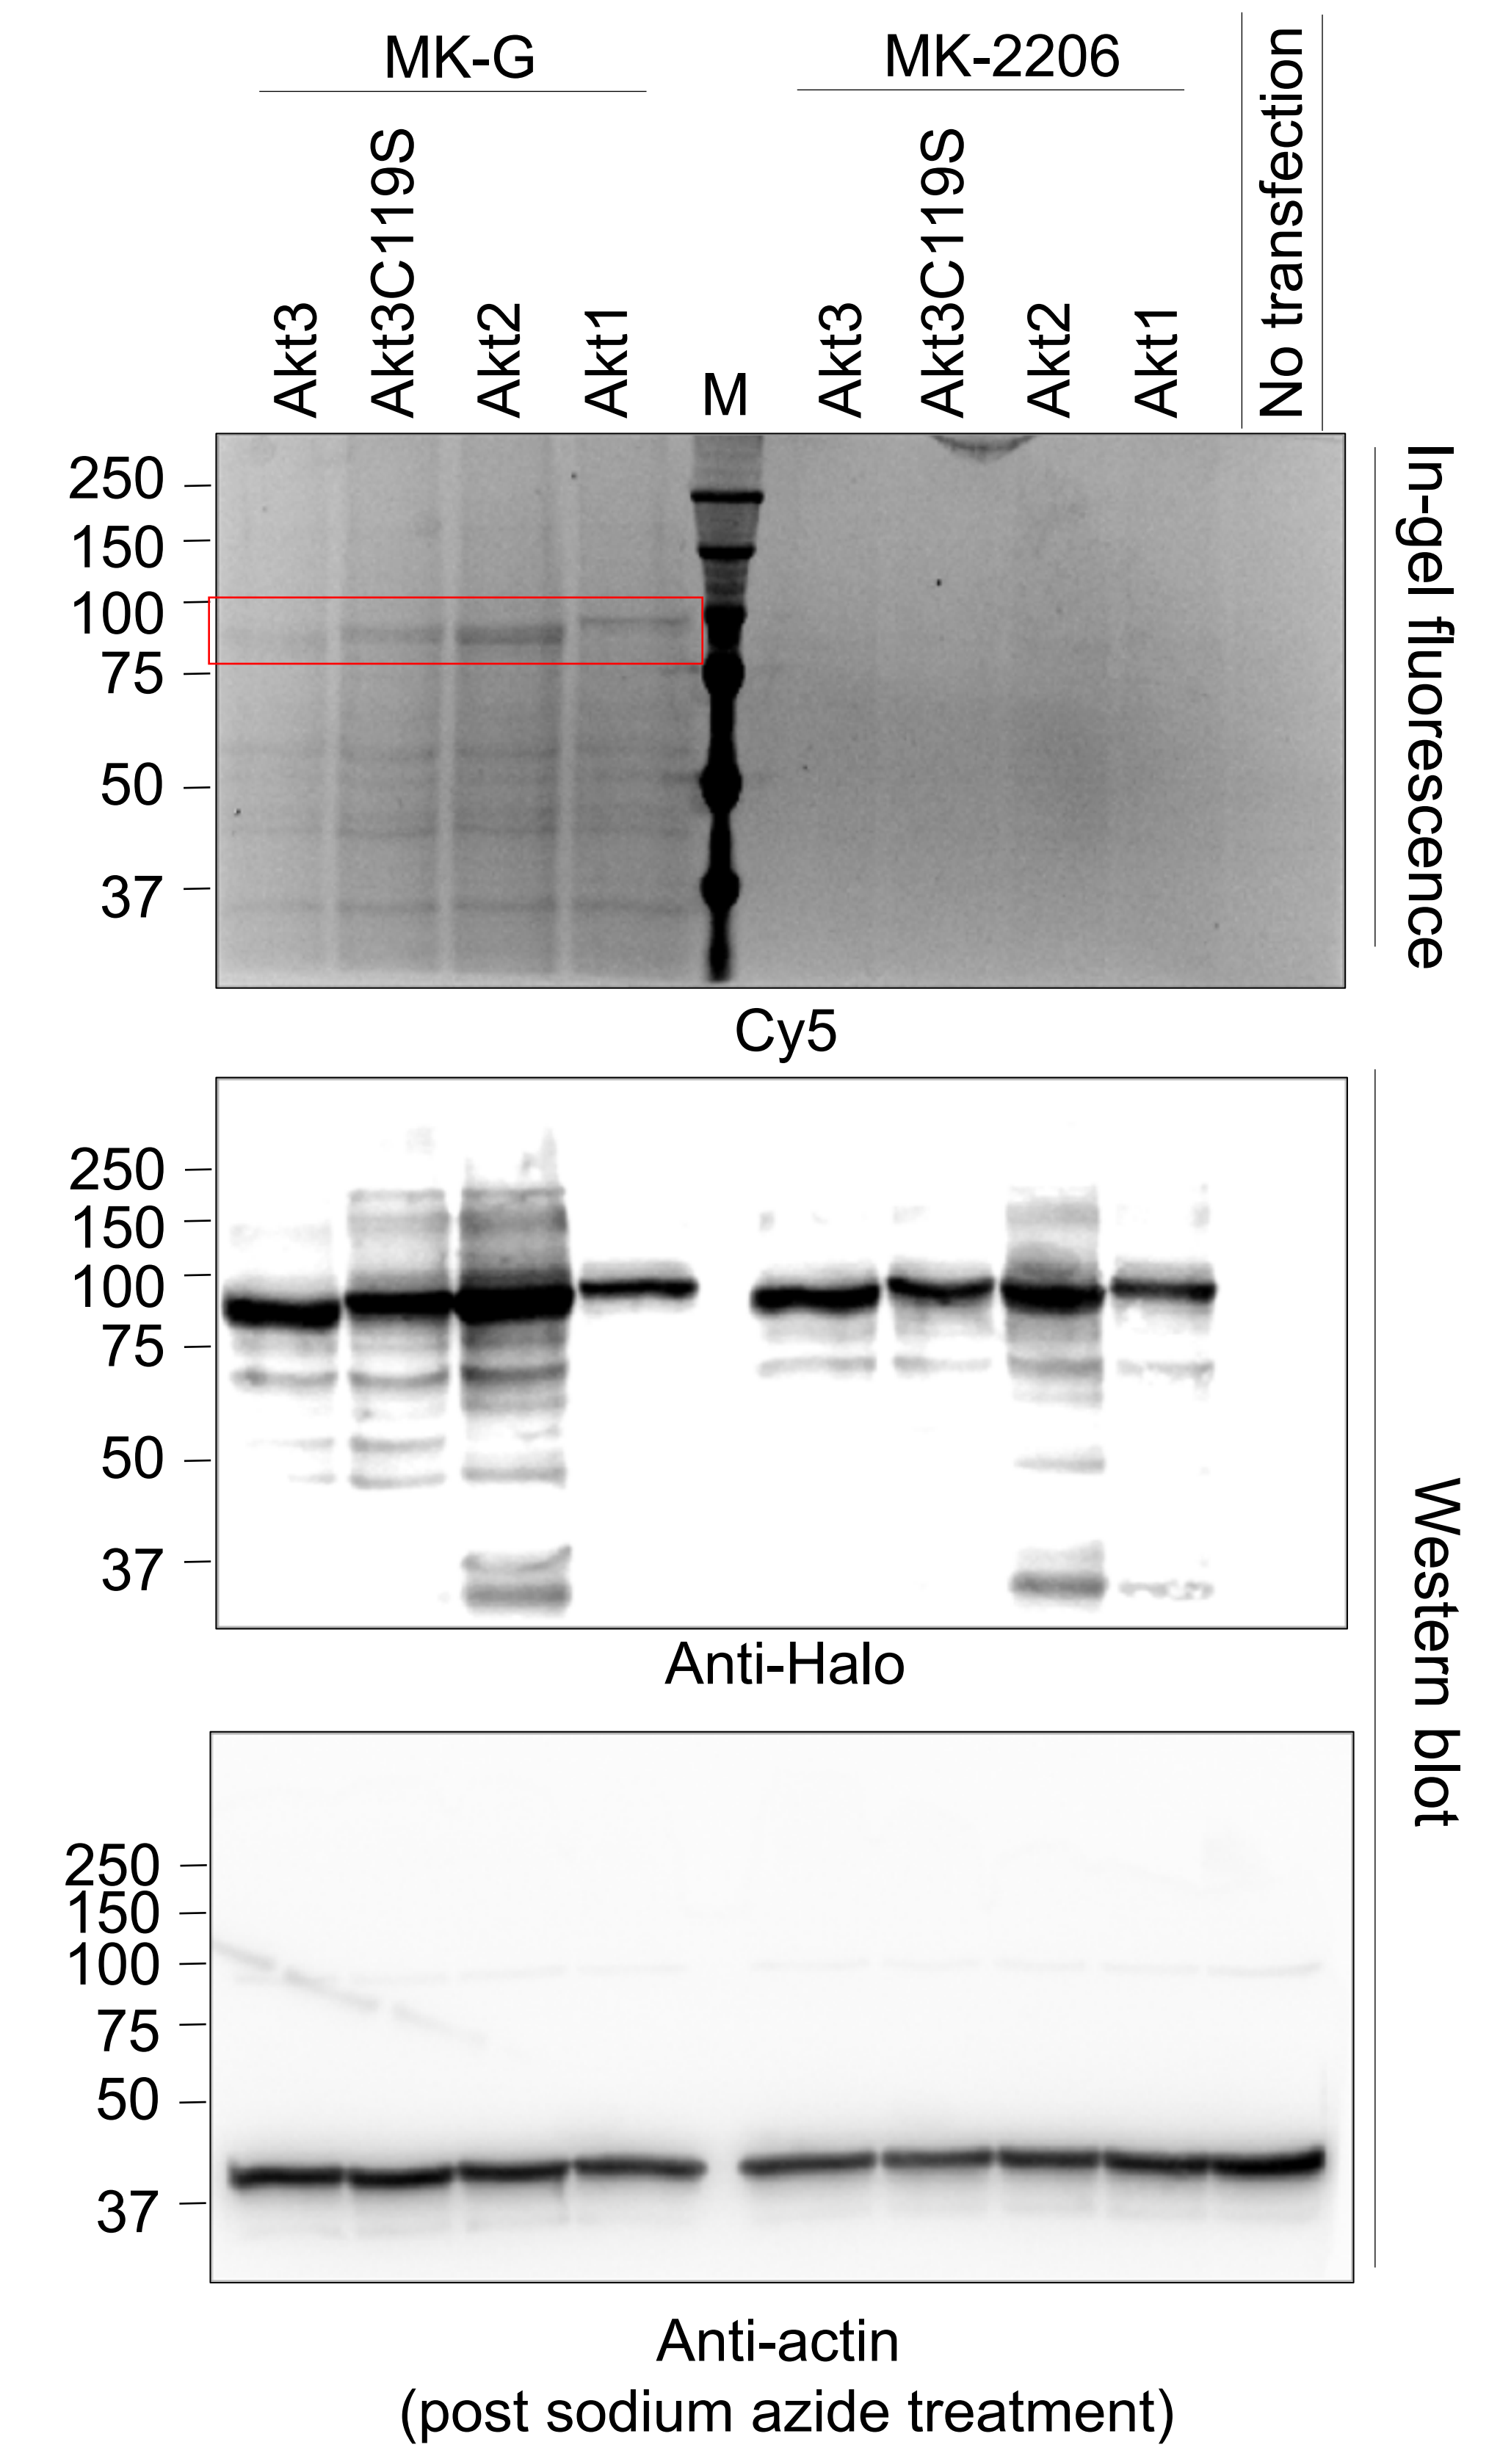

Note: Rectangular box indicates the Cy5 signal of Halo-Akt(n) used in the quantitation

Representative replicates related to data in Supplemental Figure S1 - continued

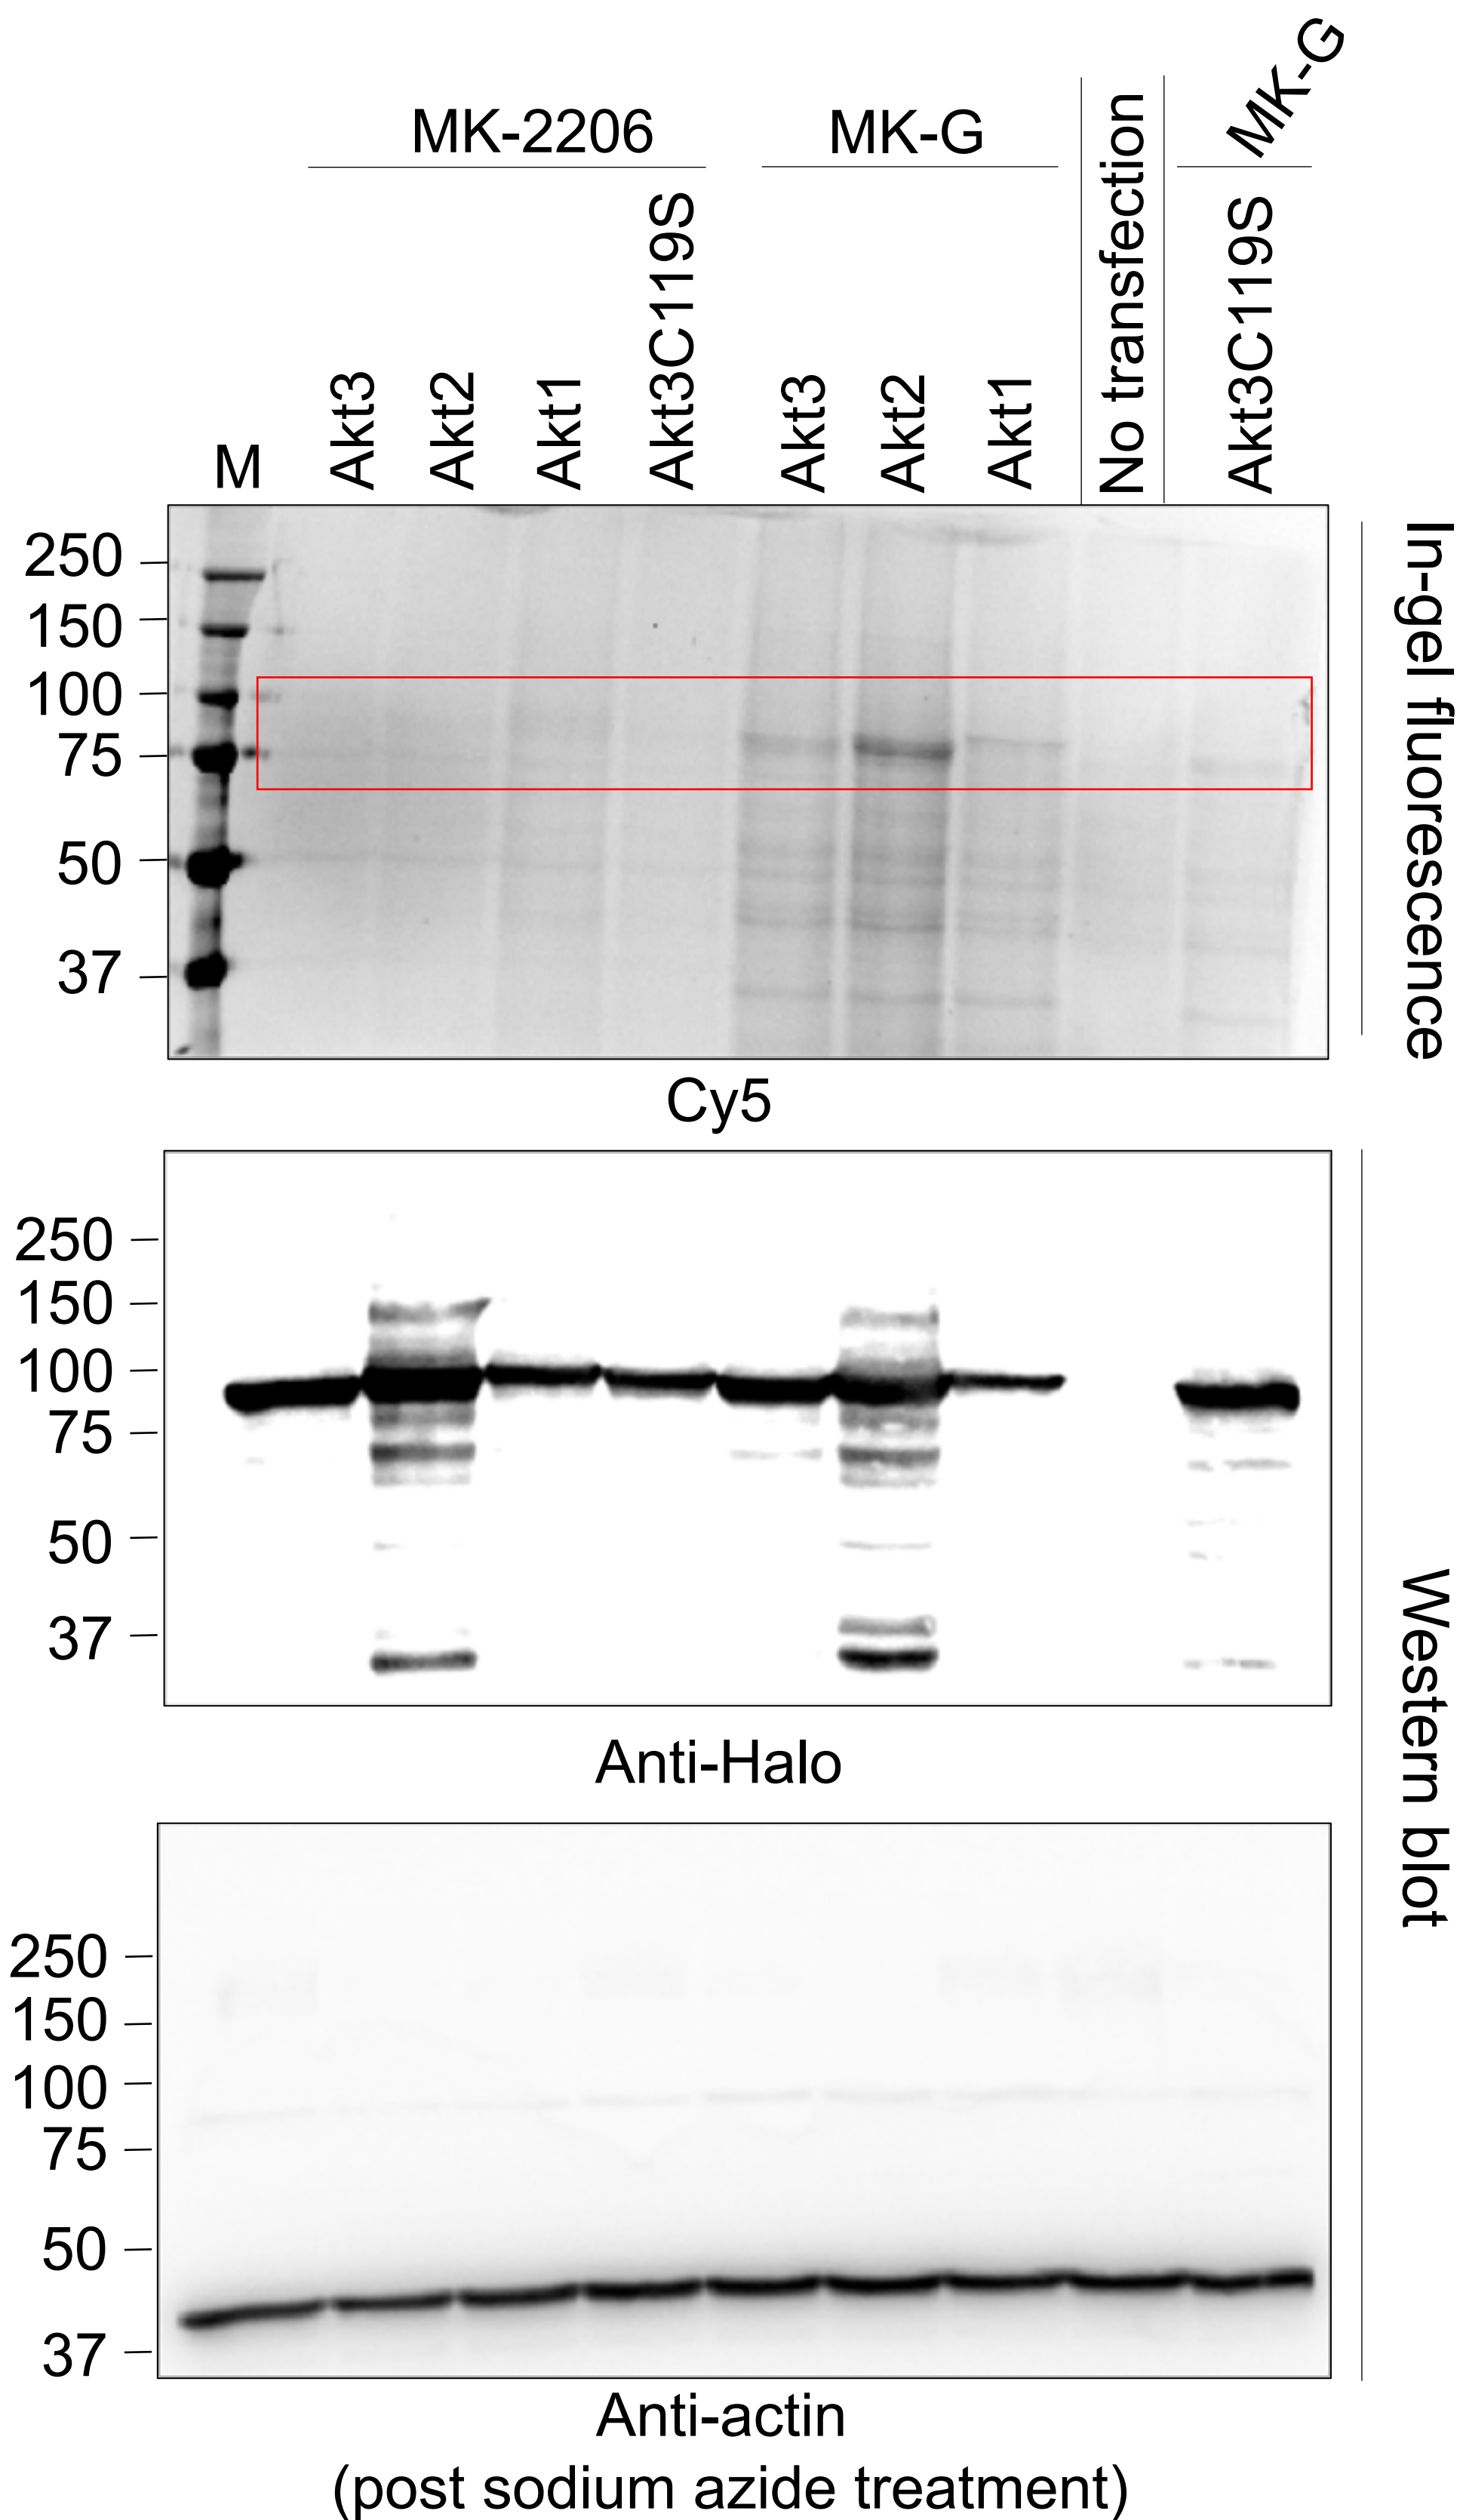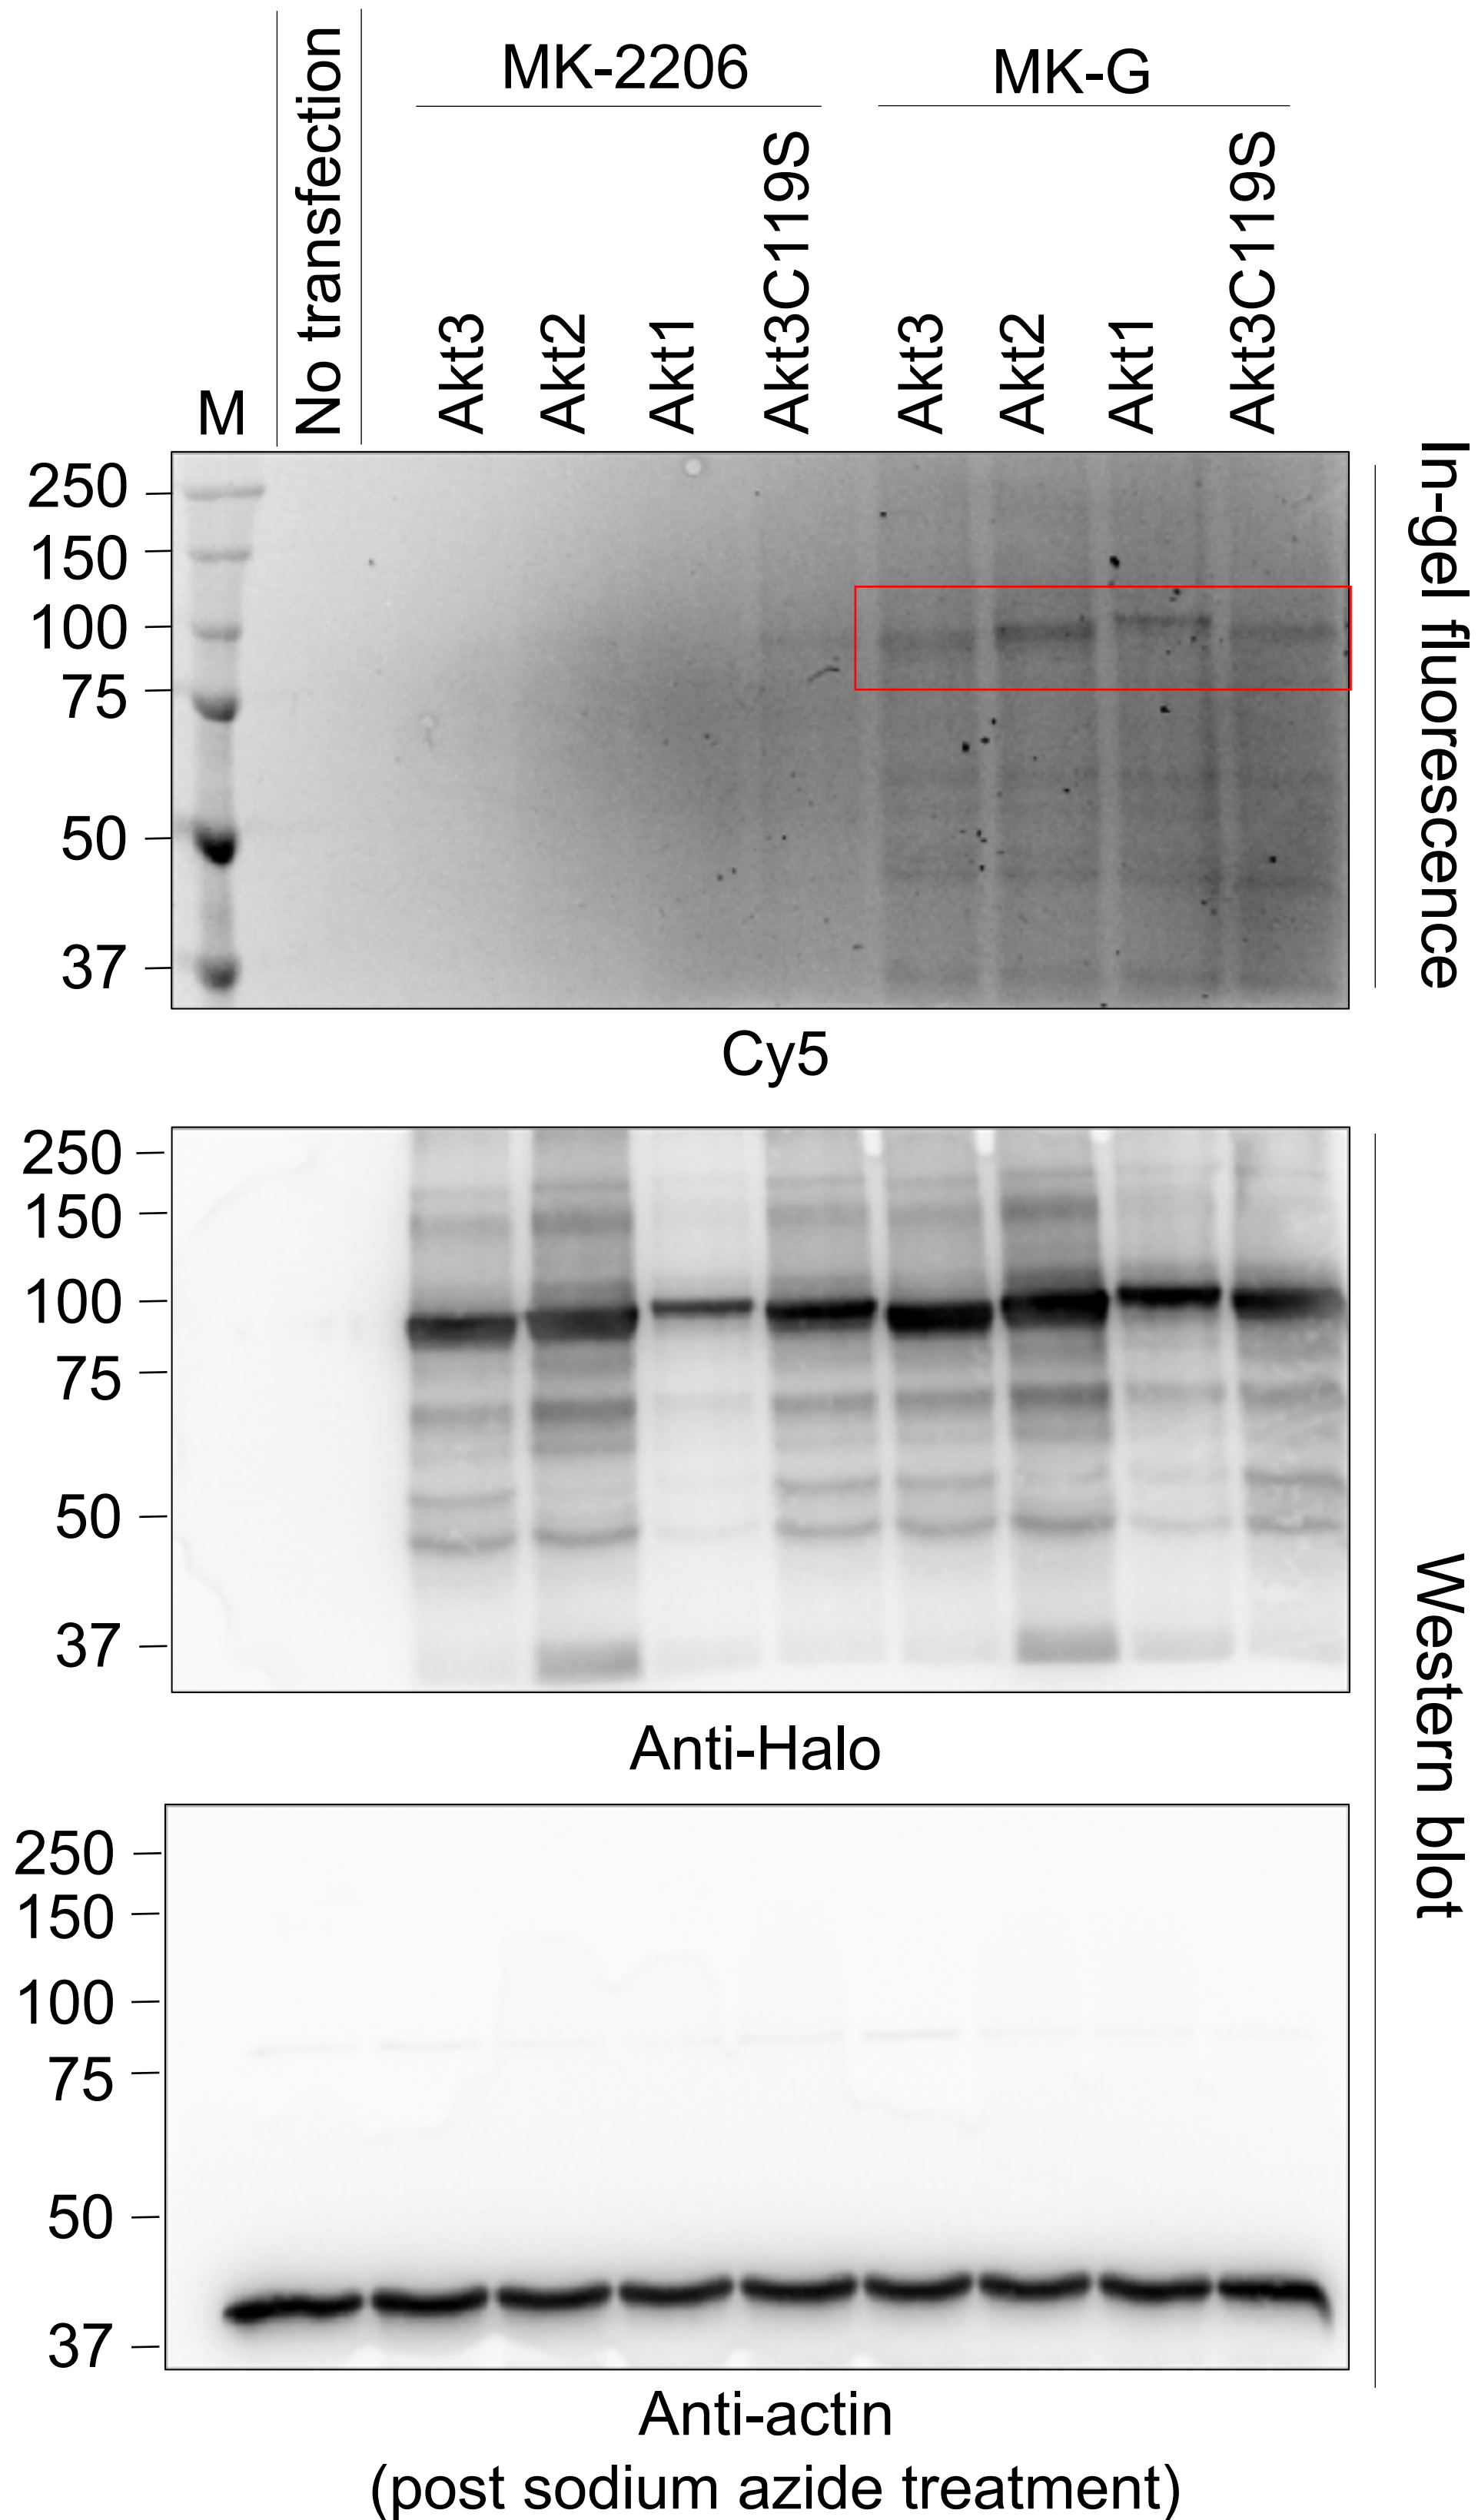

Note: Rectangular box indicates the Cy5 signal of Halo-Akt(n) used in the quantitation

**Representative replicates related to data in Supplemental Figure S2**

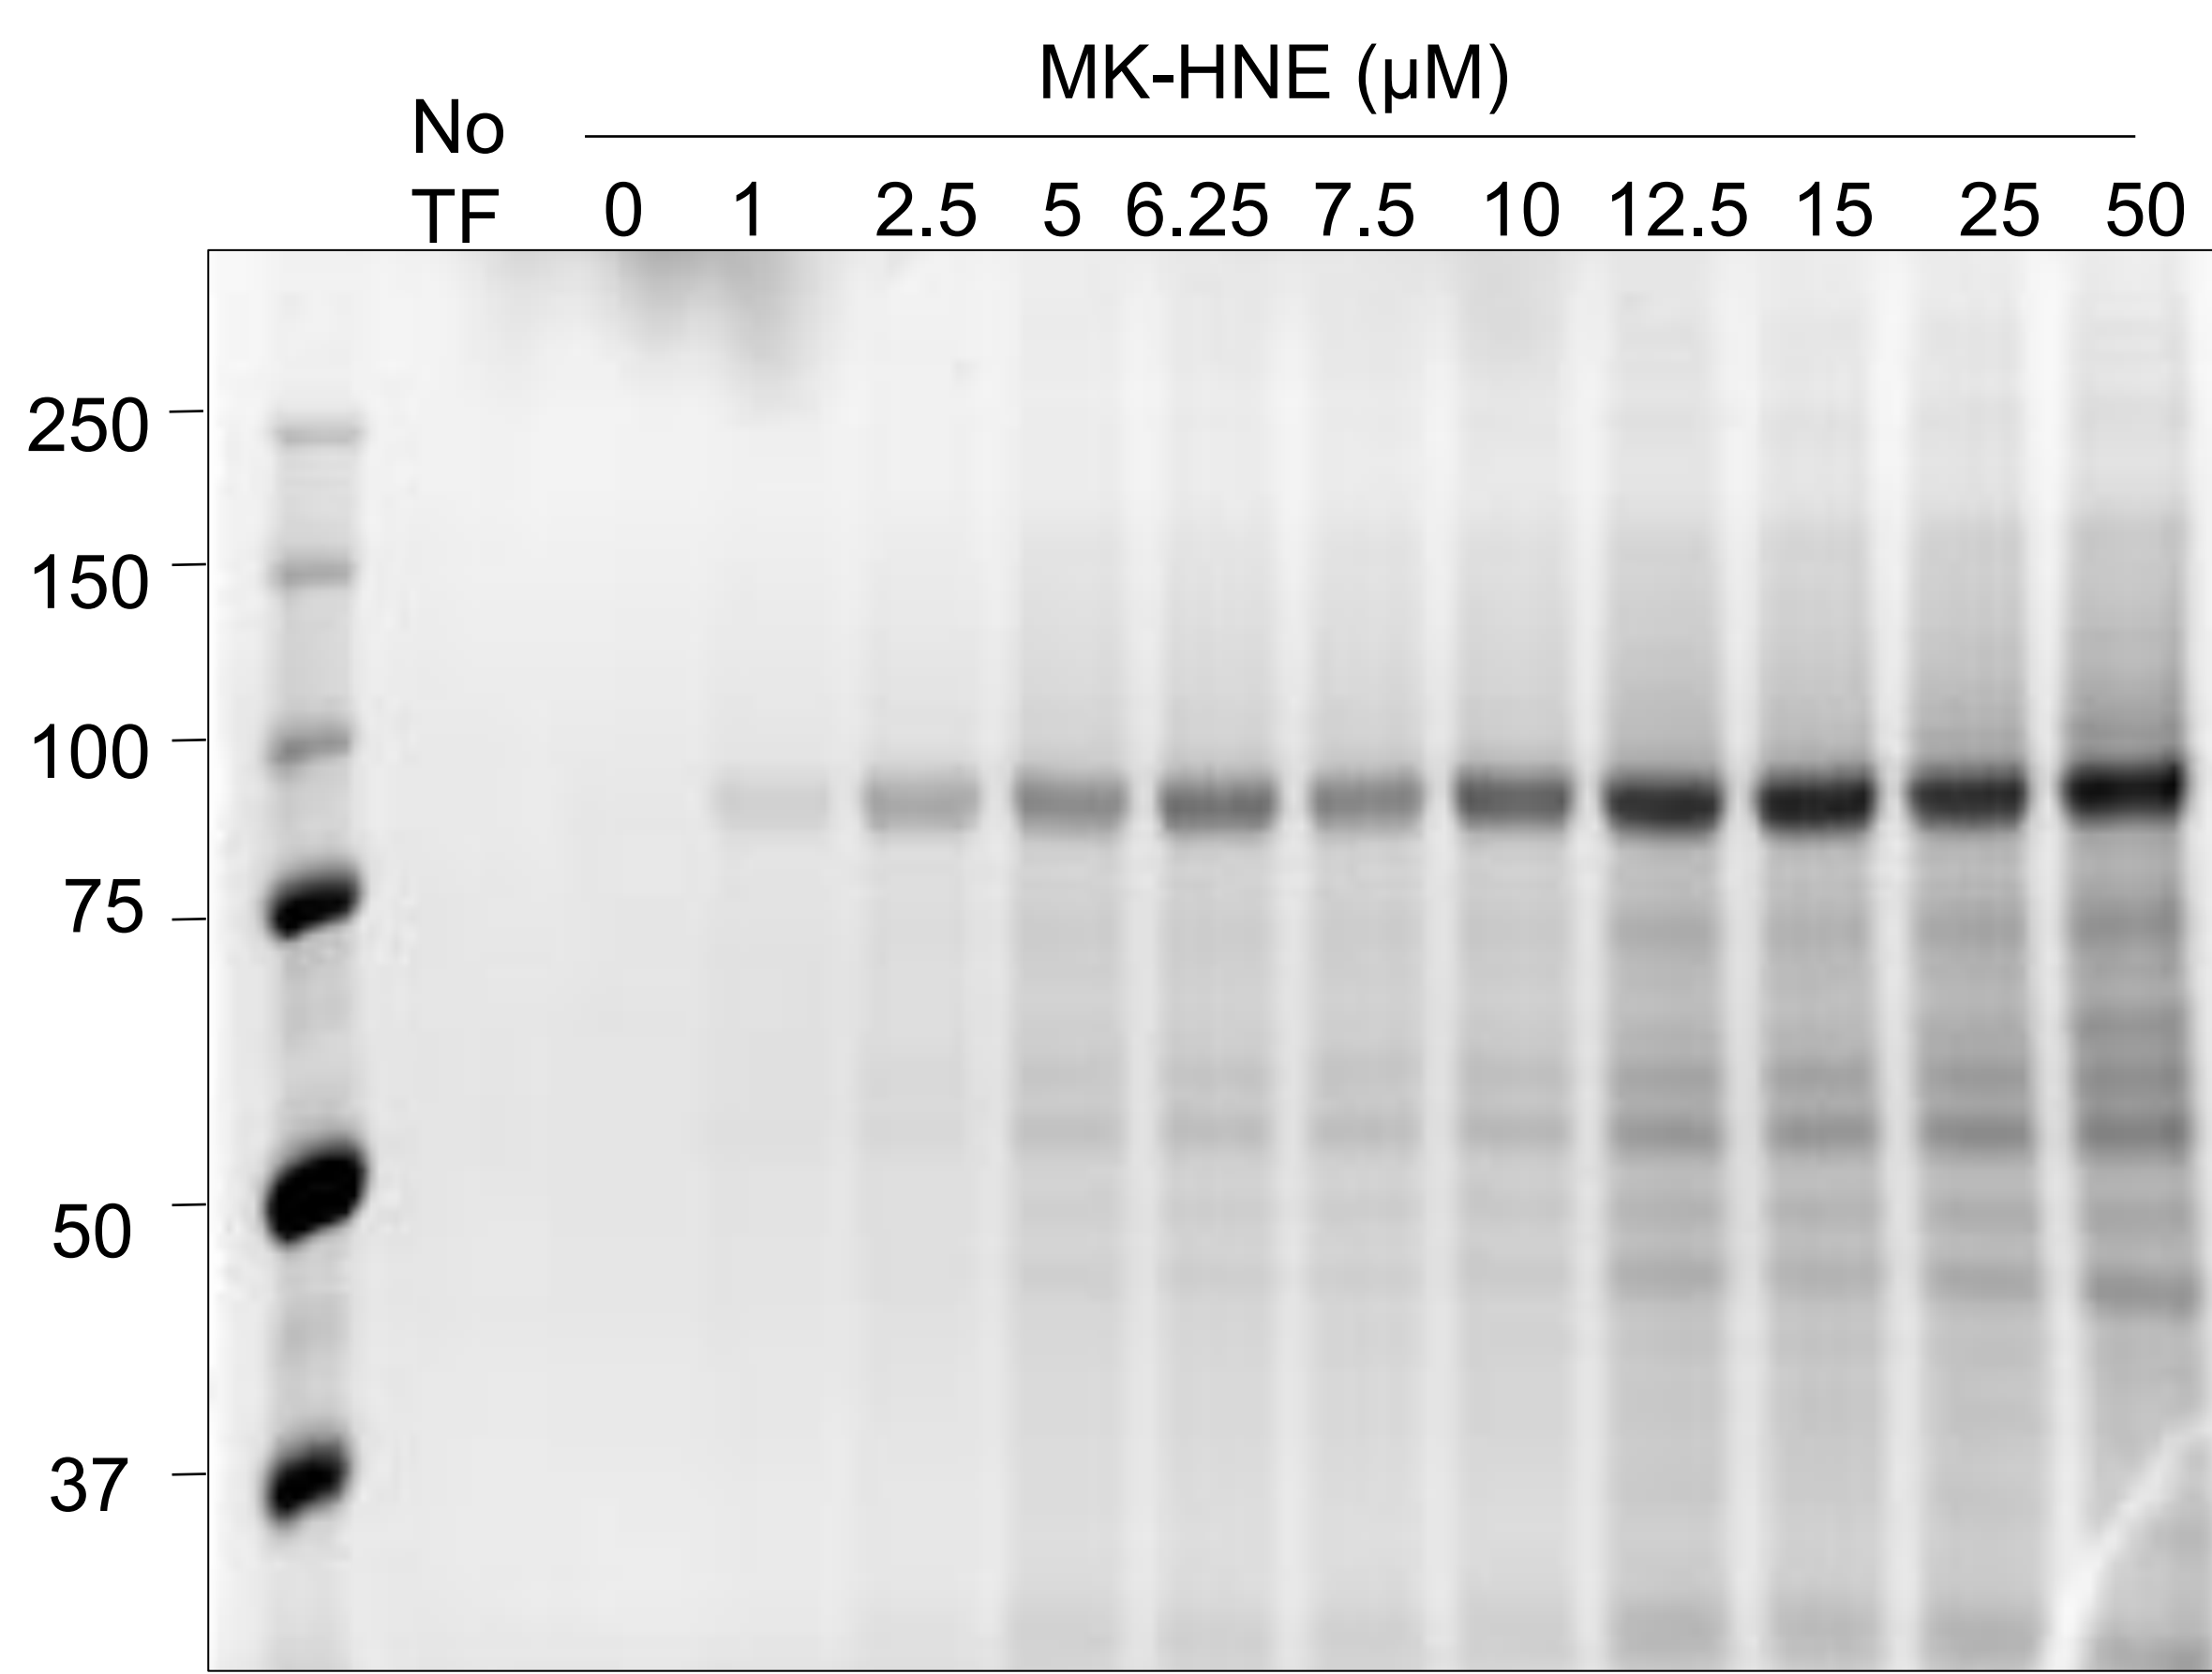

Cy5 (Halo-Akt3)

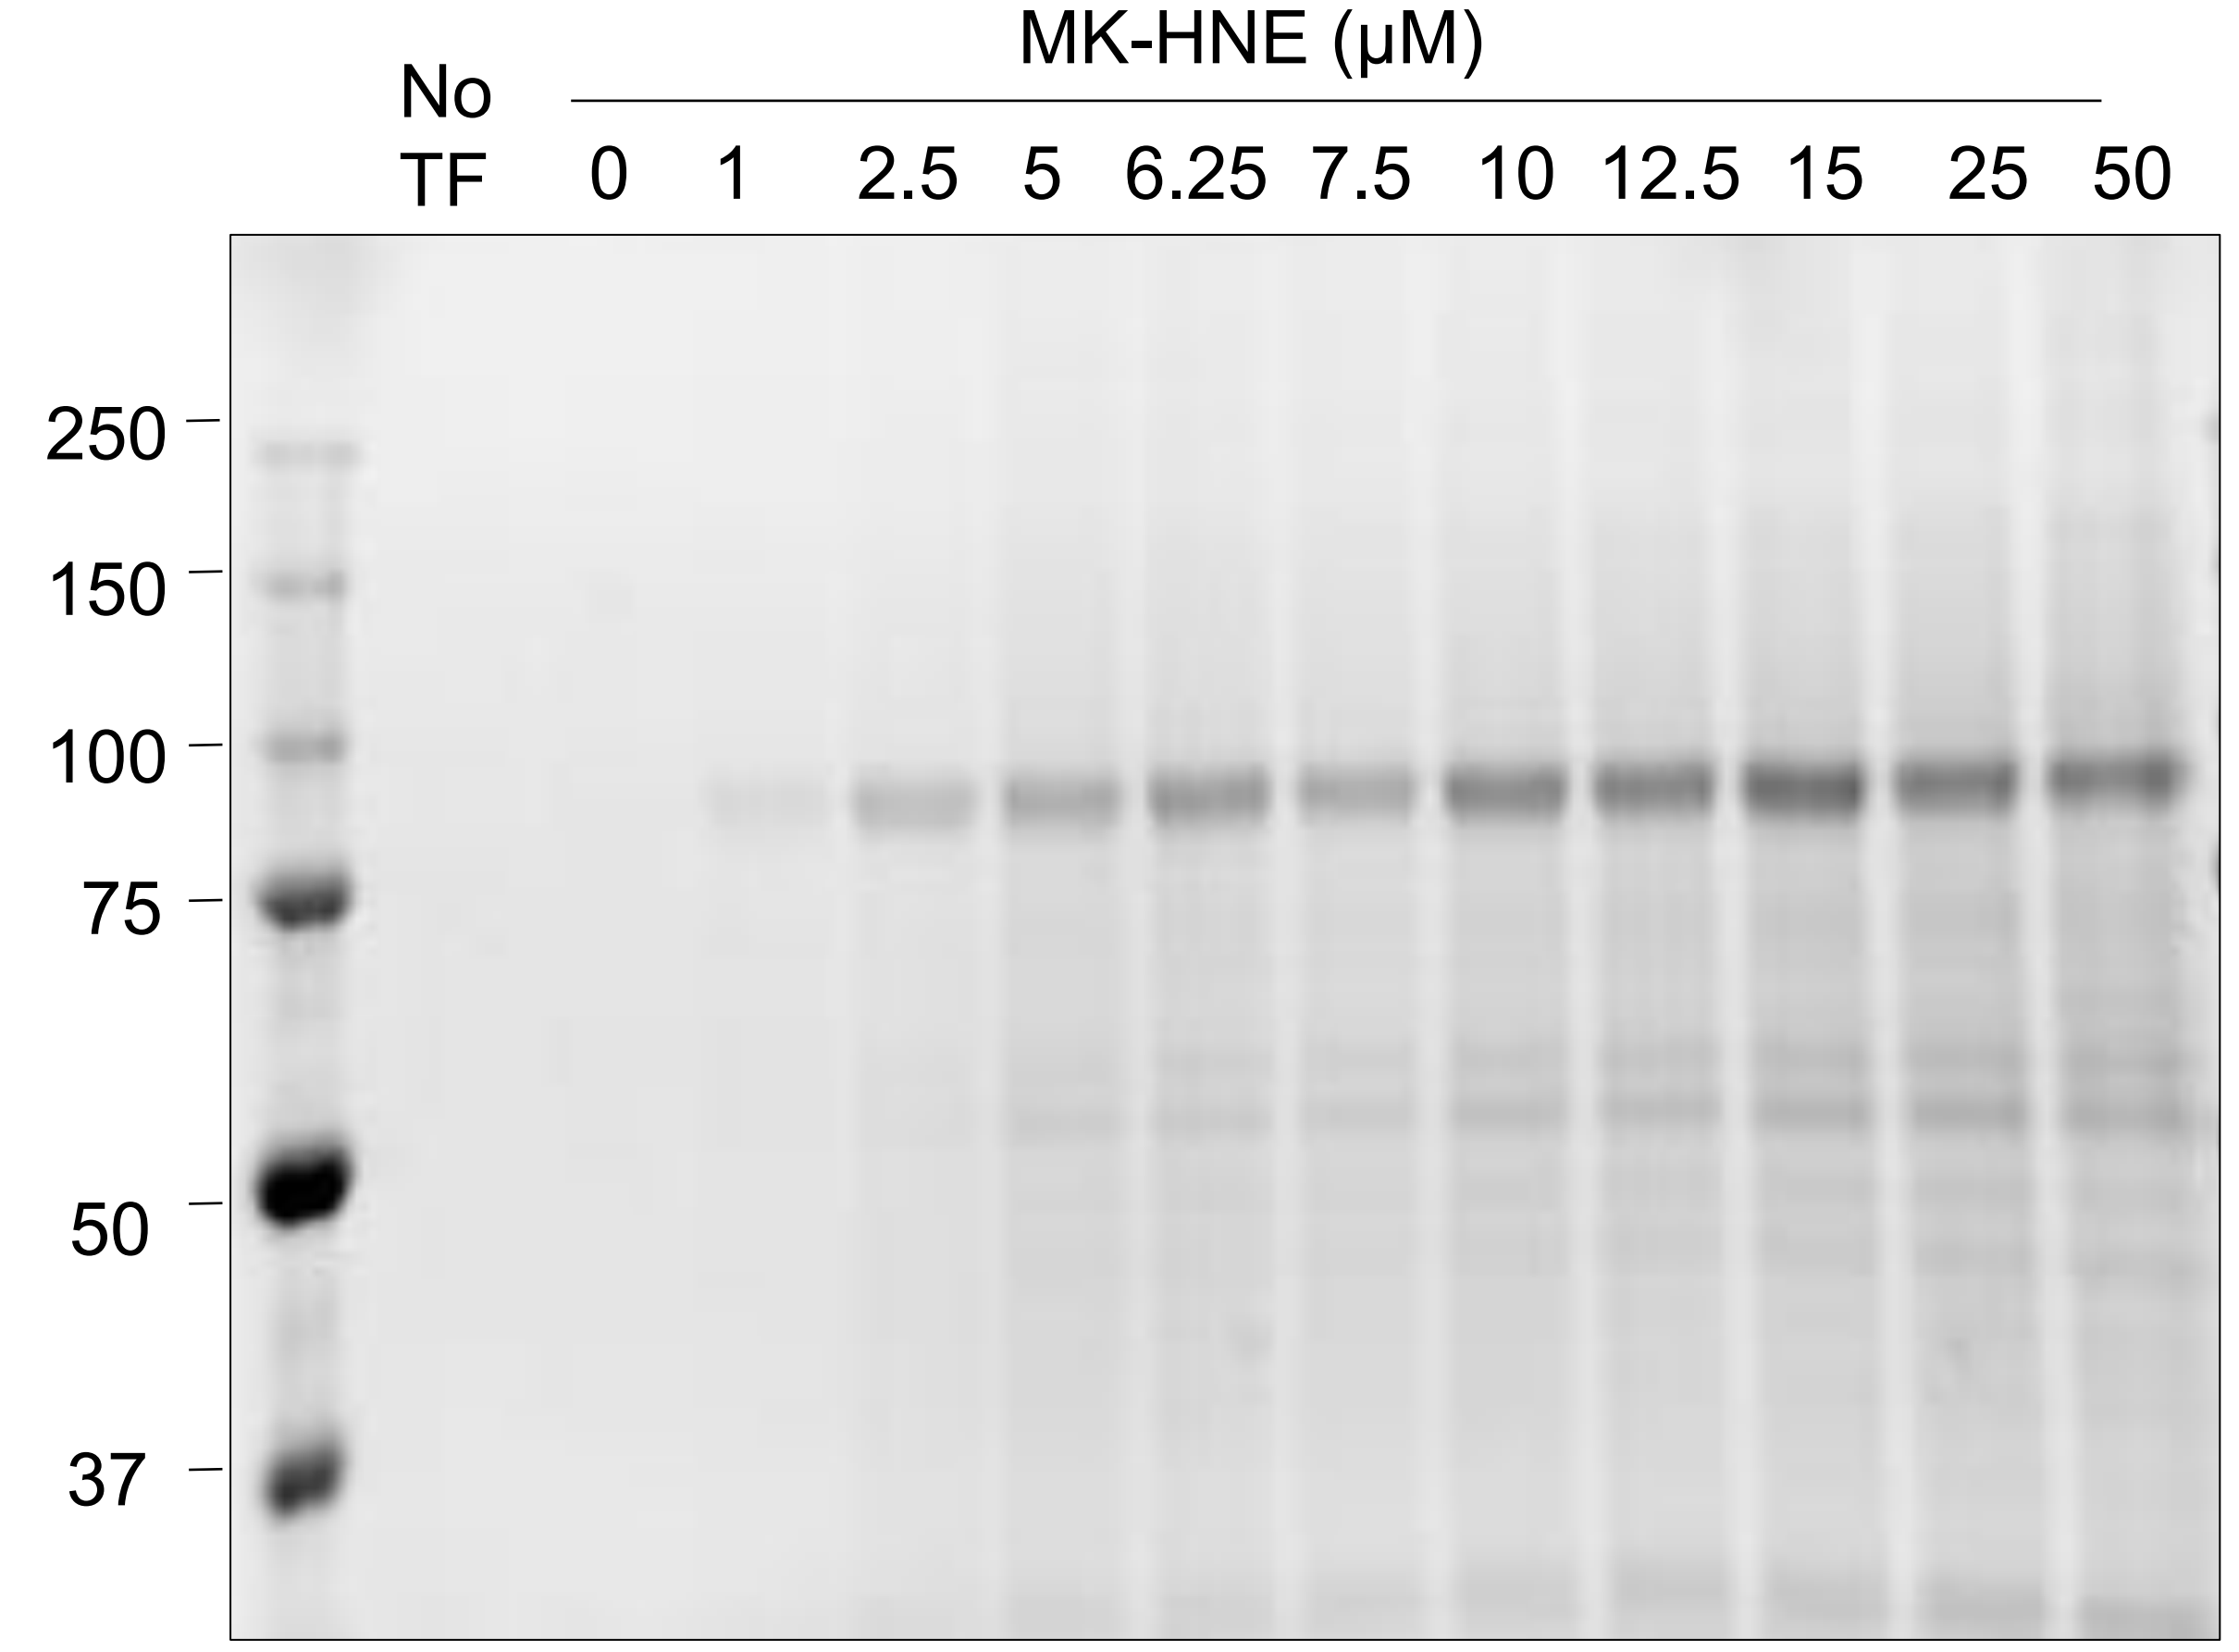

Cy5 (Halo-Akt3)

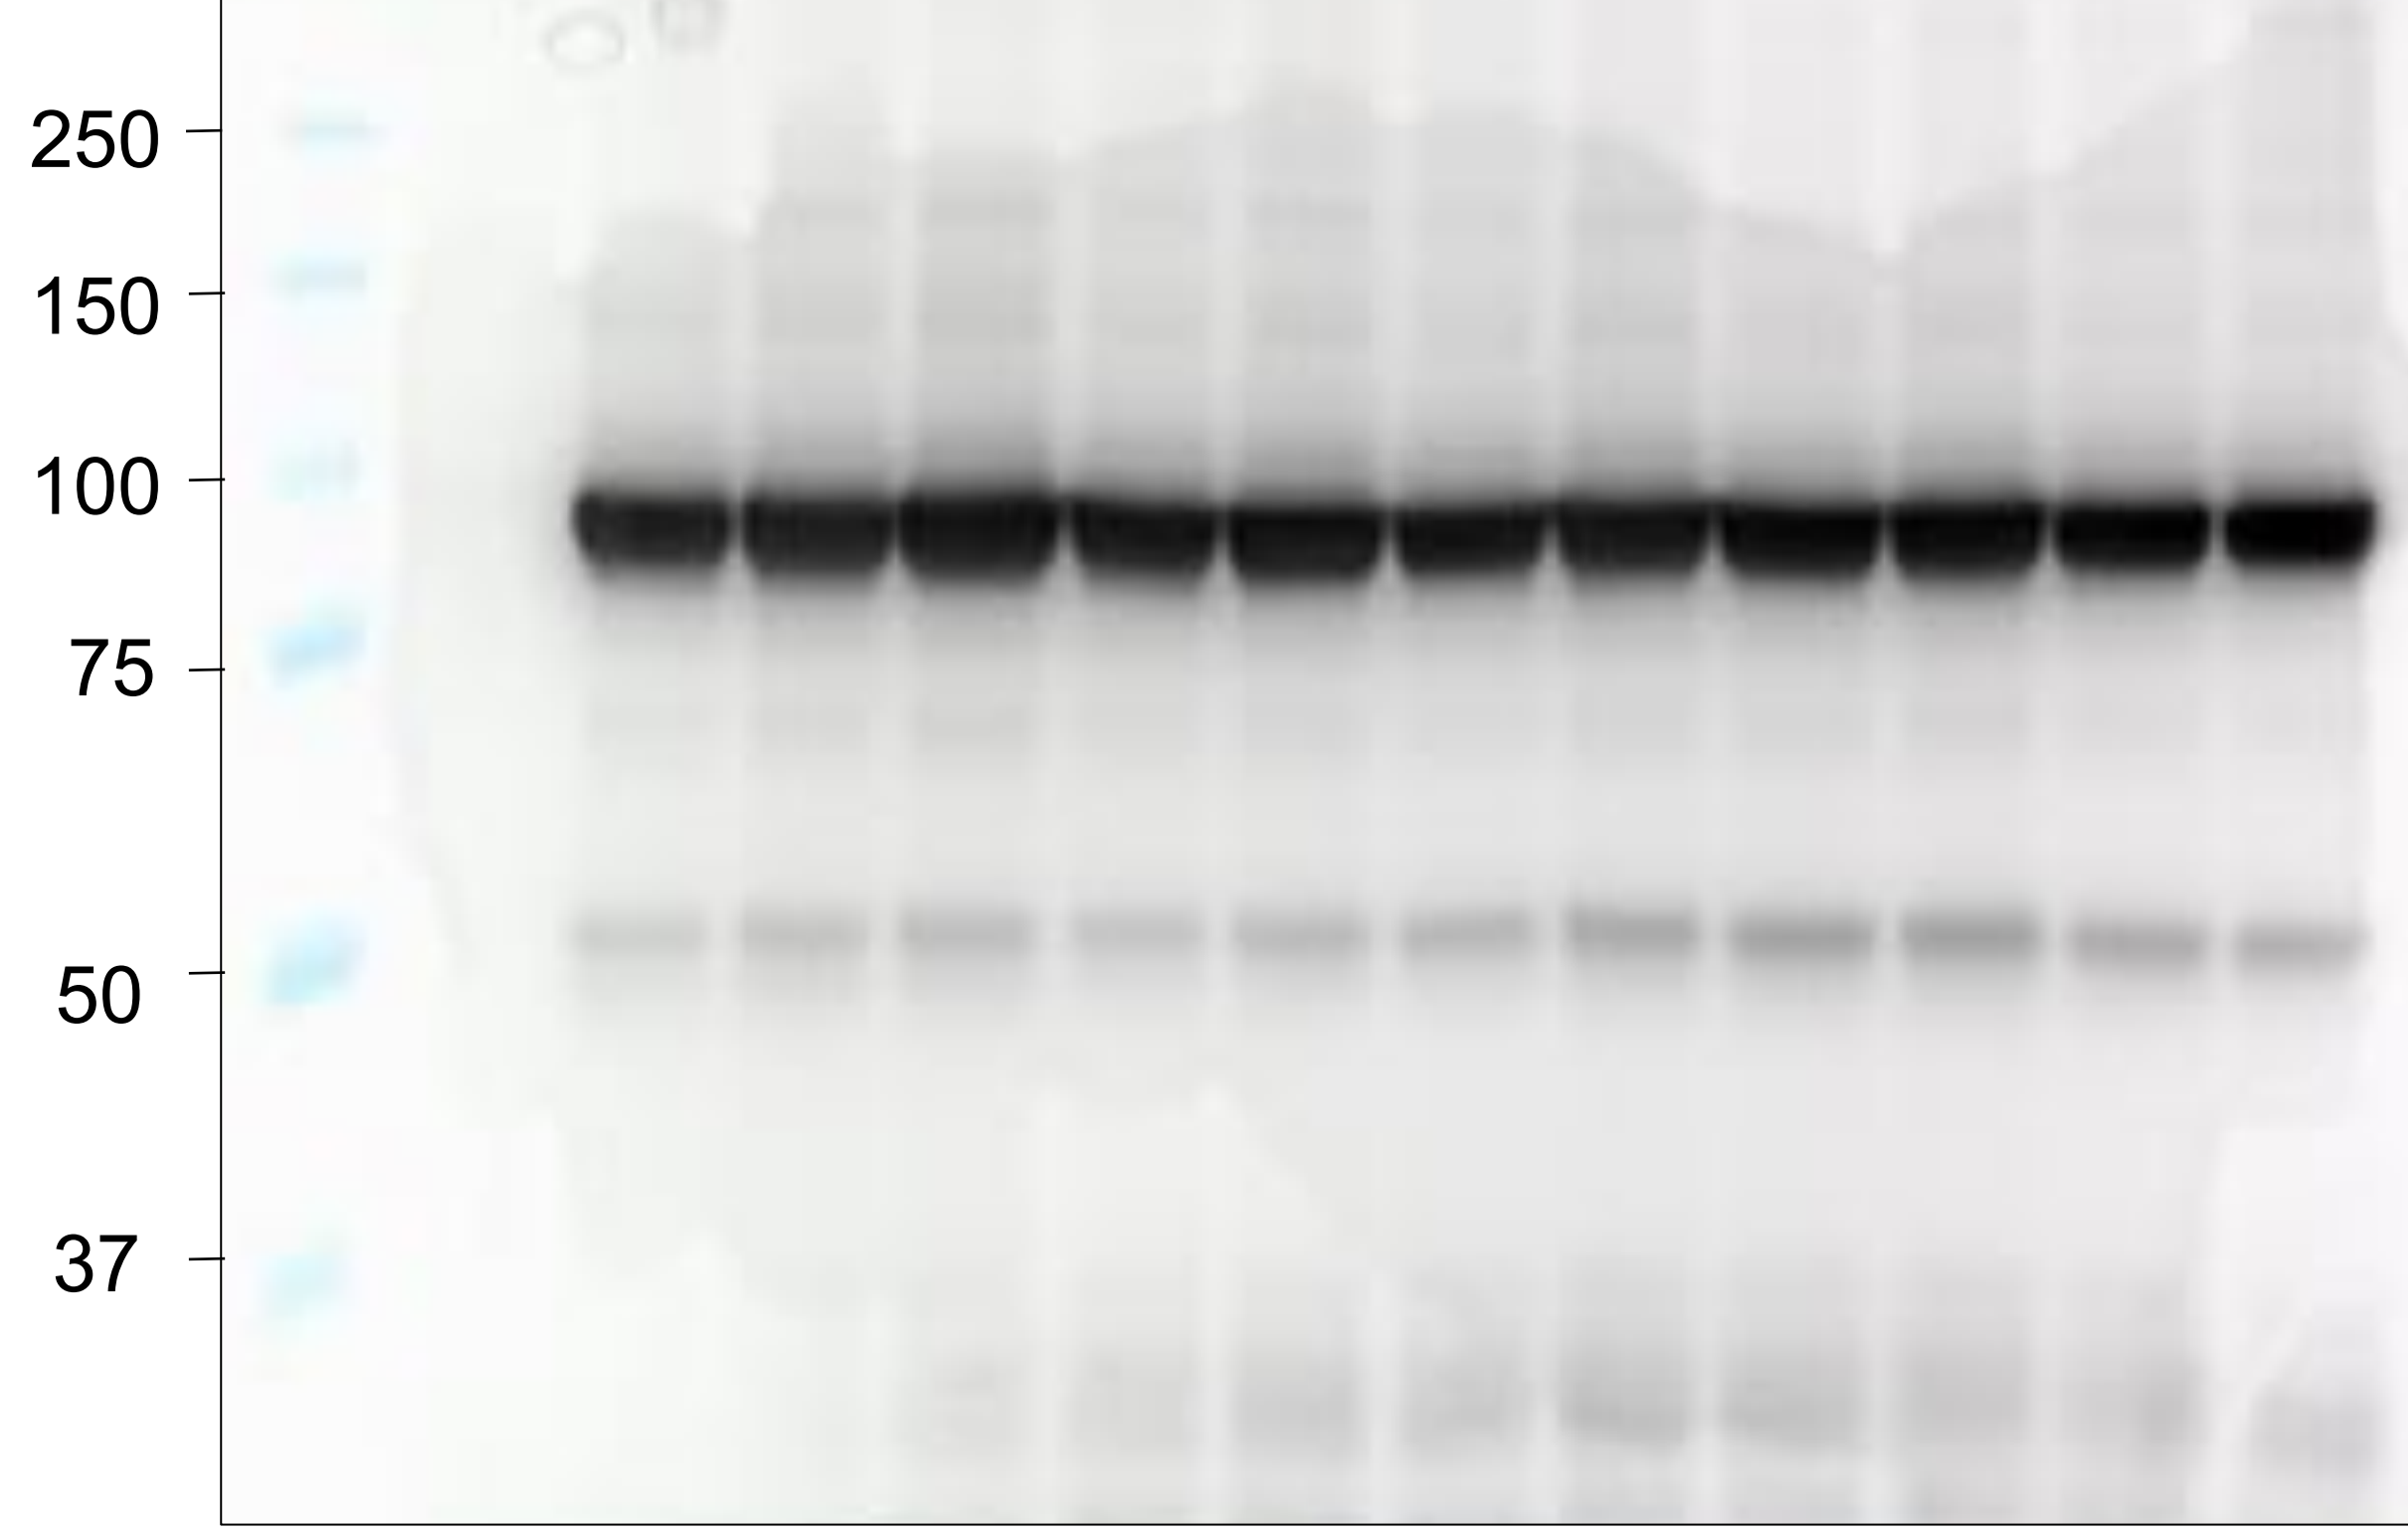

anti-Halo

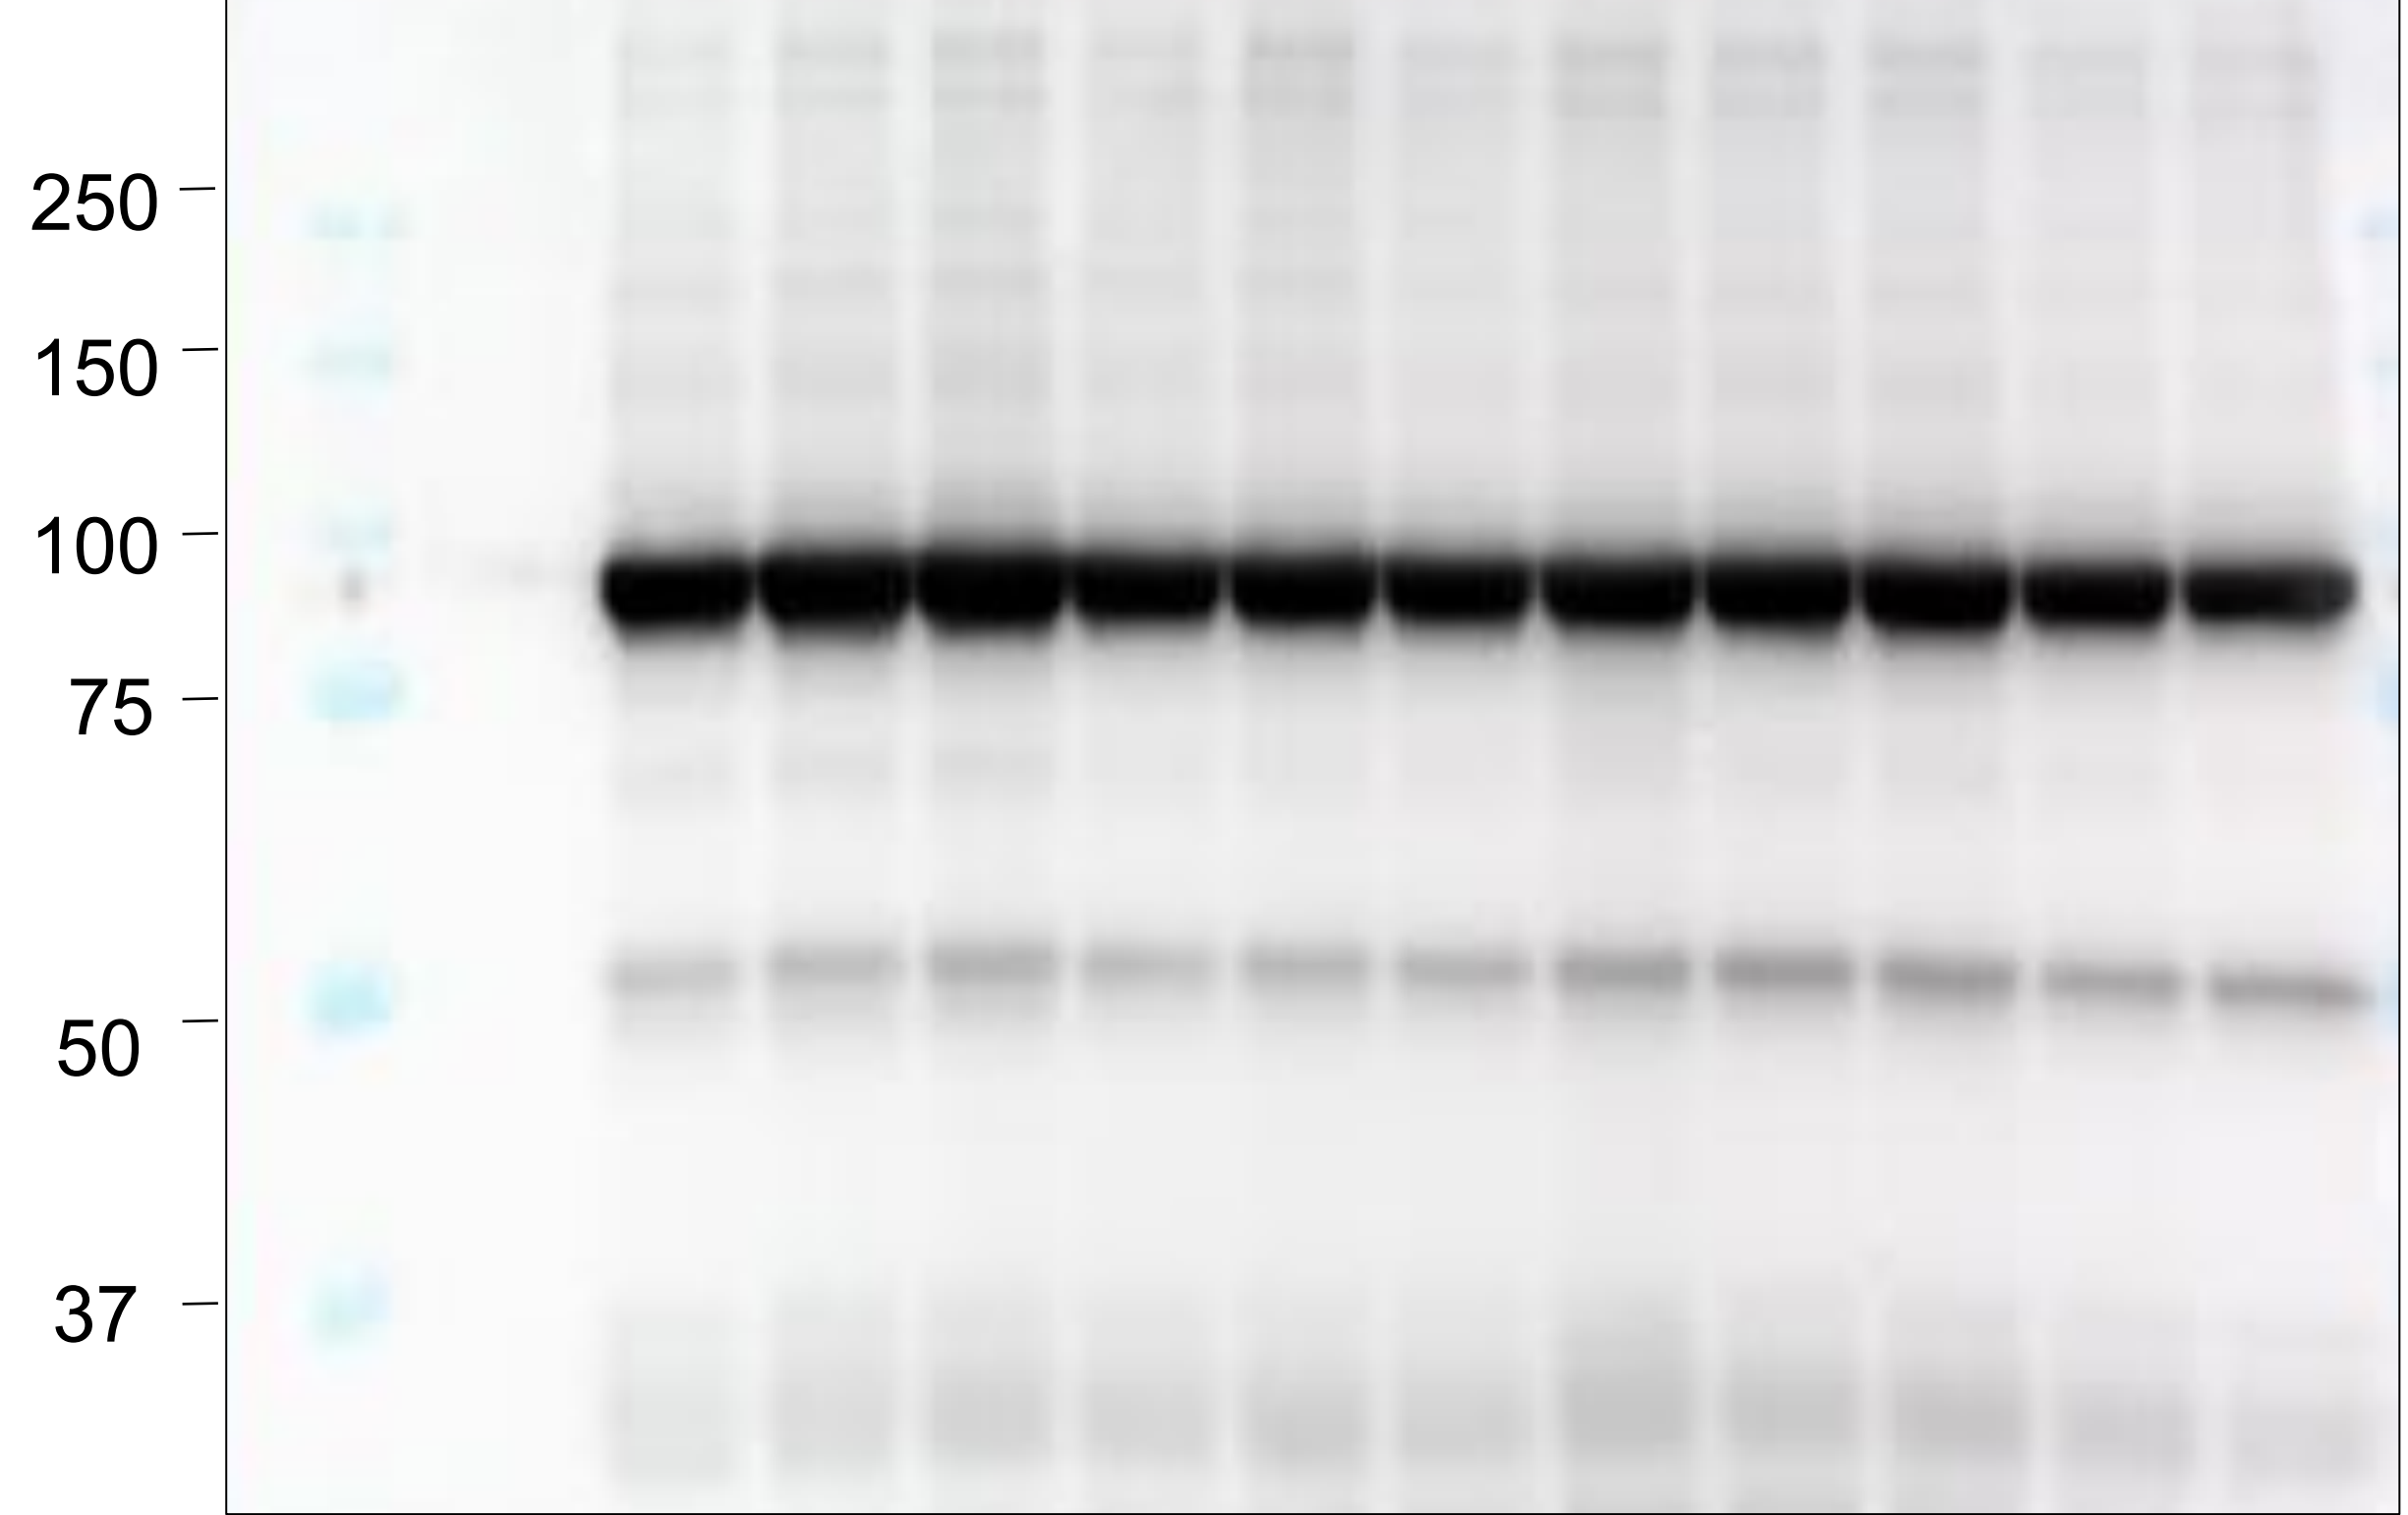

anti-Halo

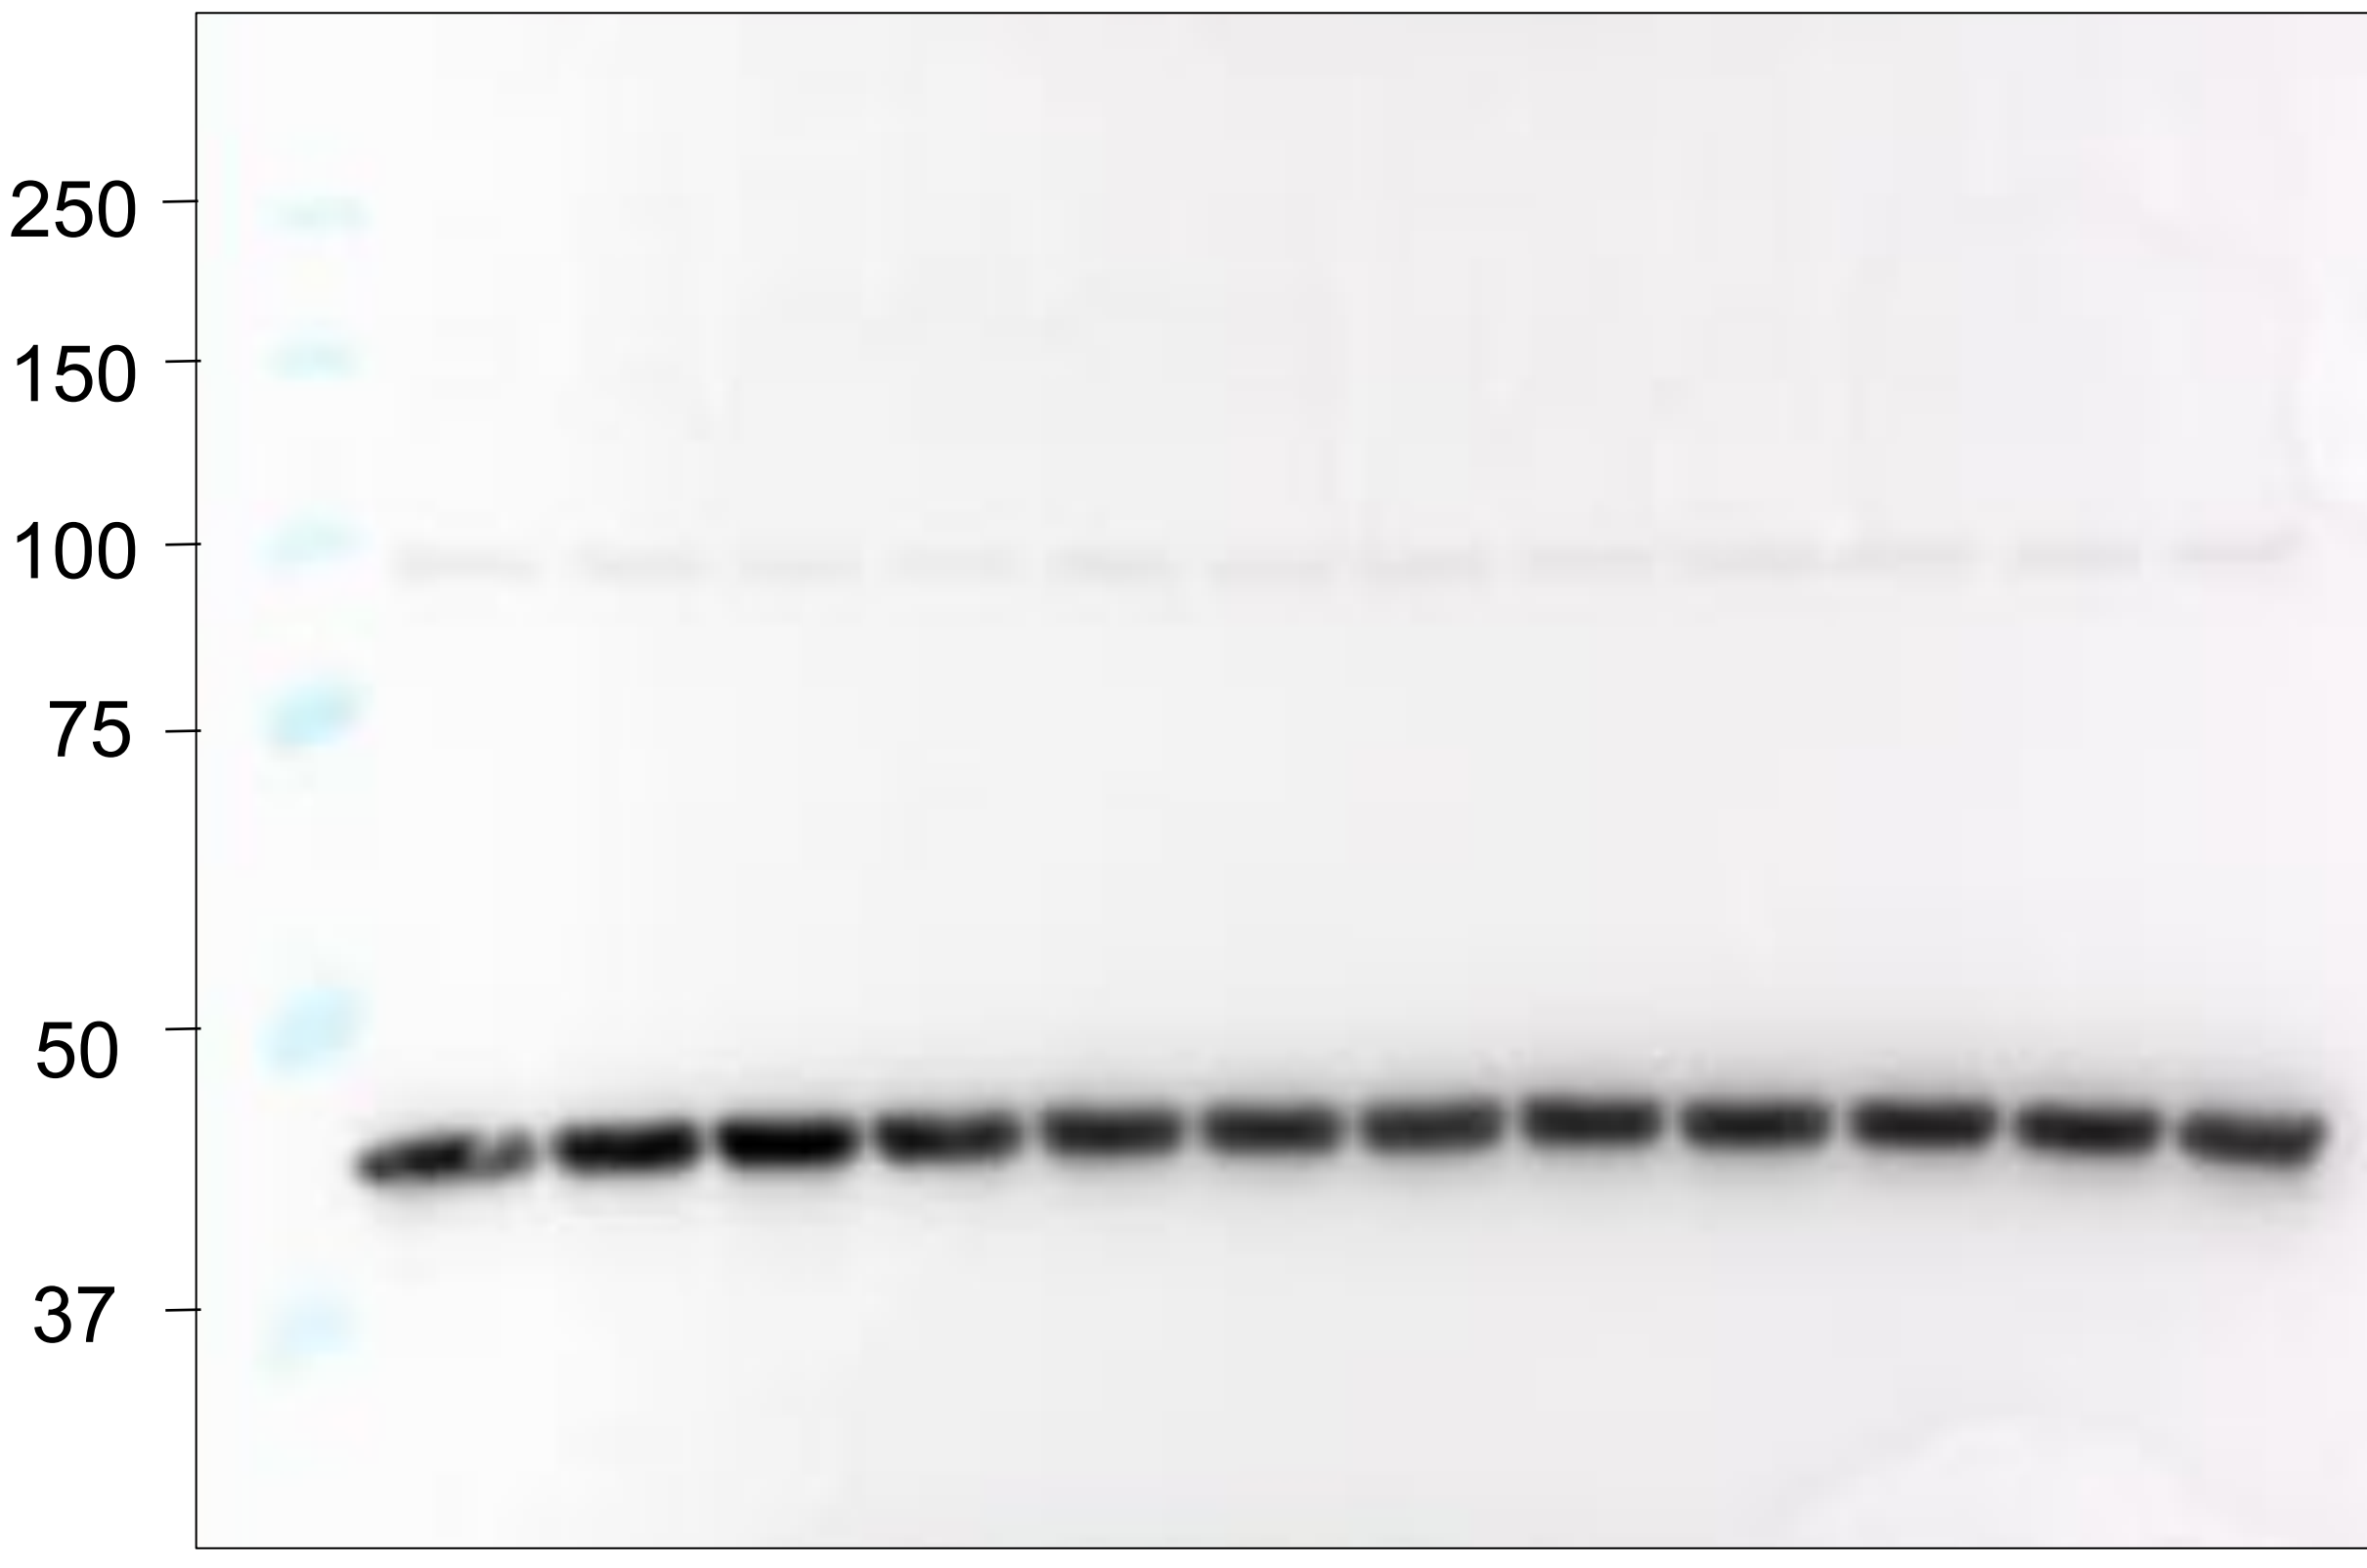

anti-actin

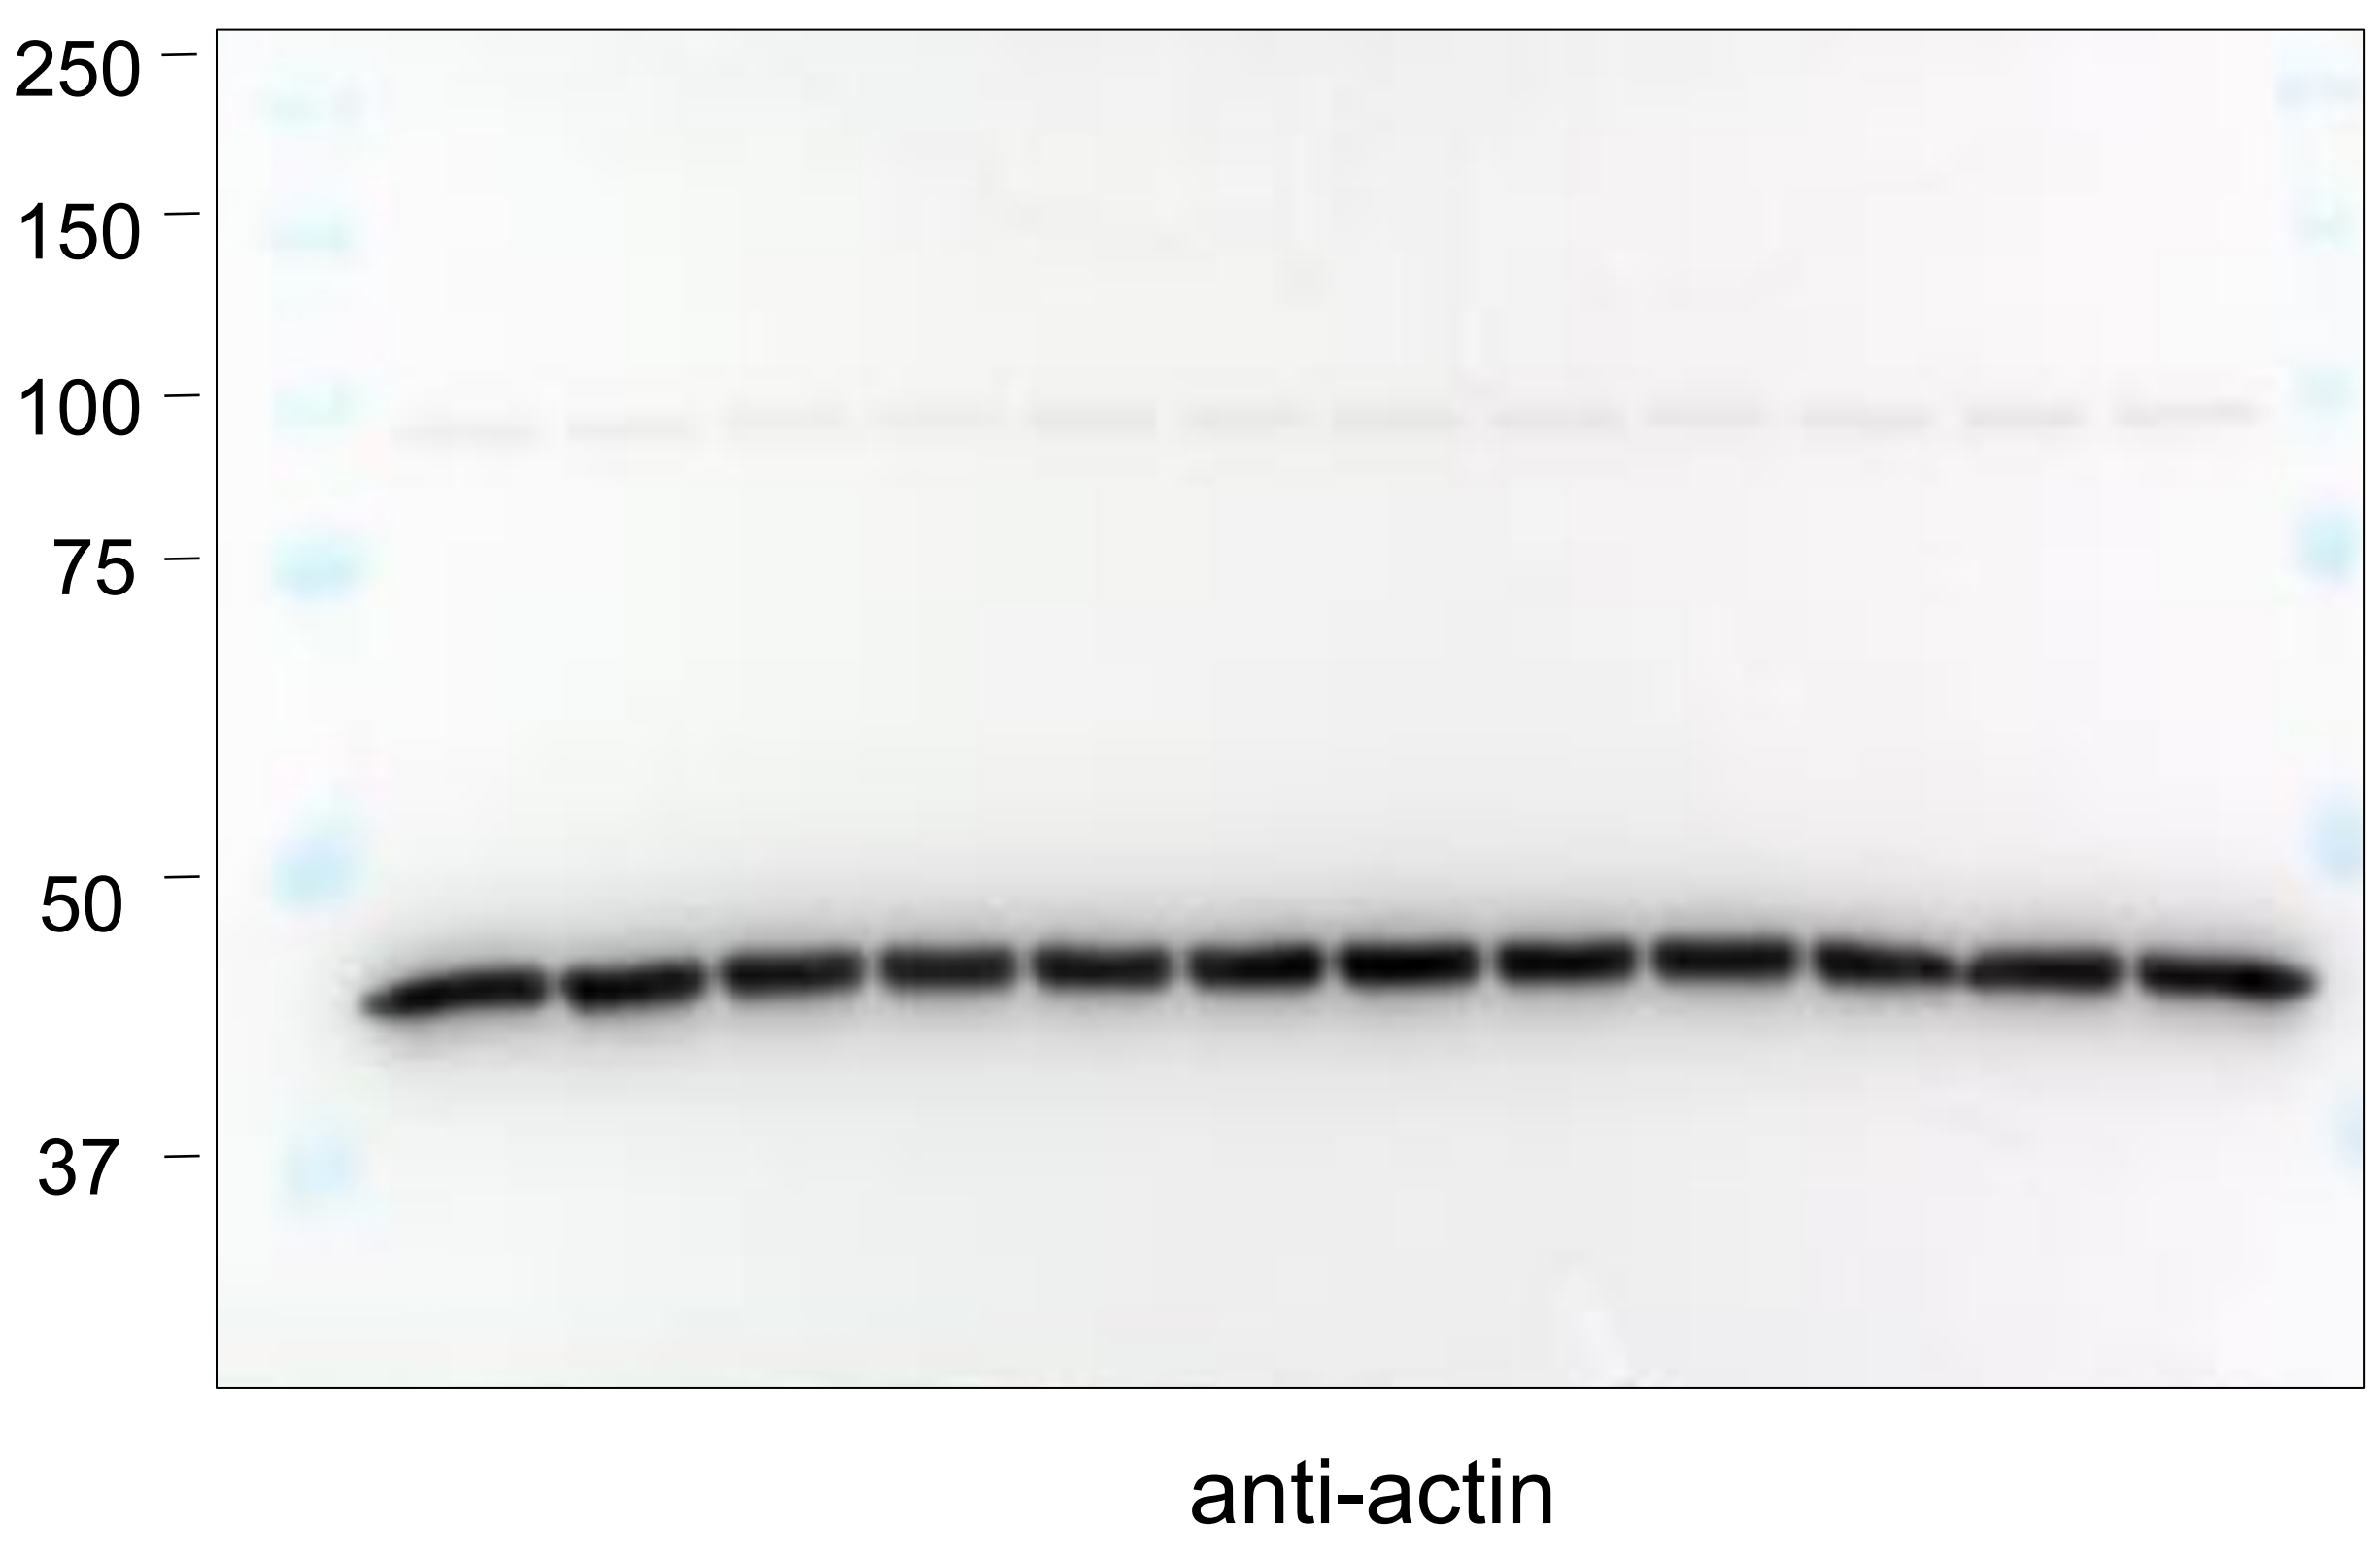

anti-actin

**Representative replicates related to data in Supplemental Figure S2**

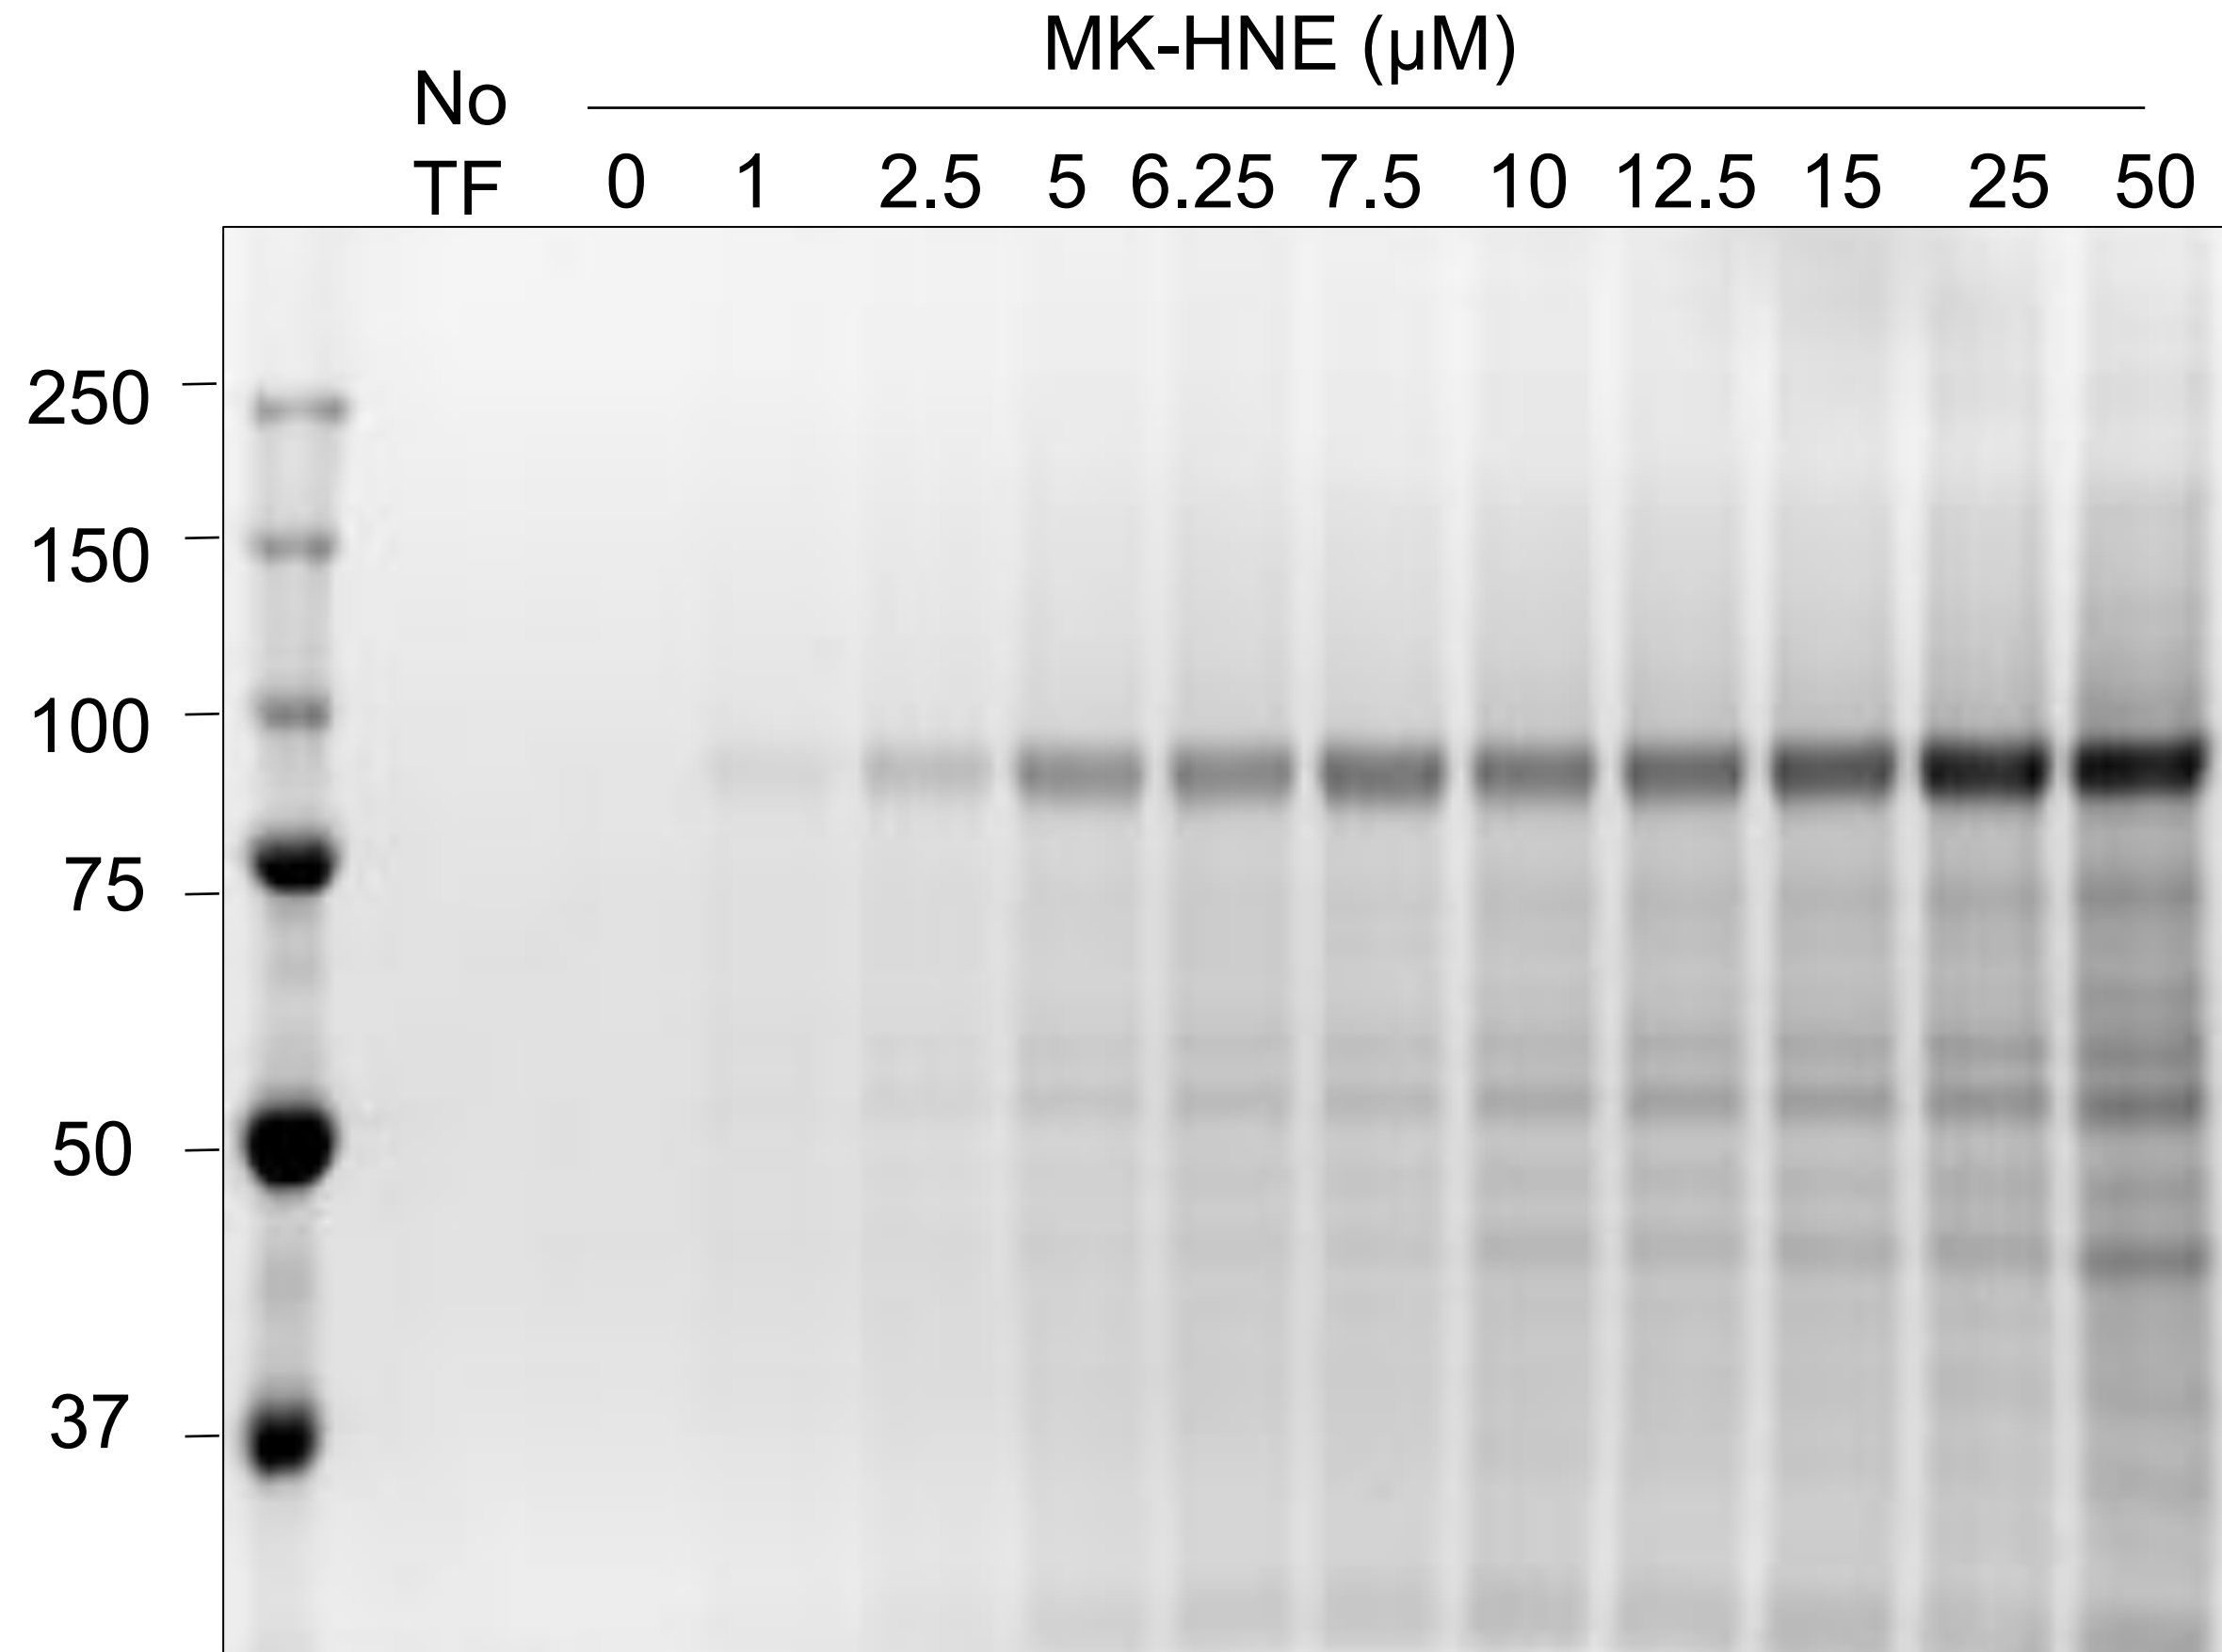

Cy5 (Halo-Akt3)

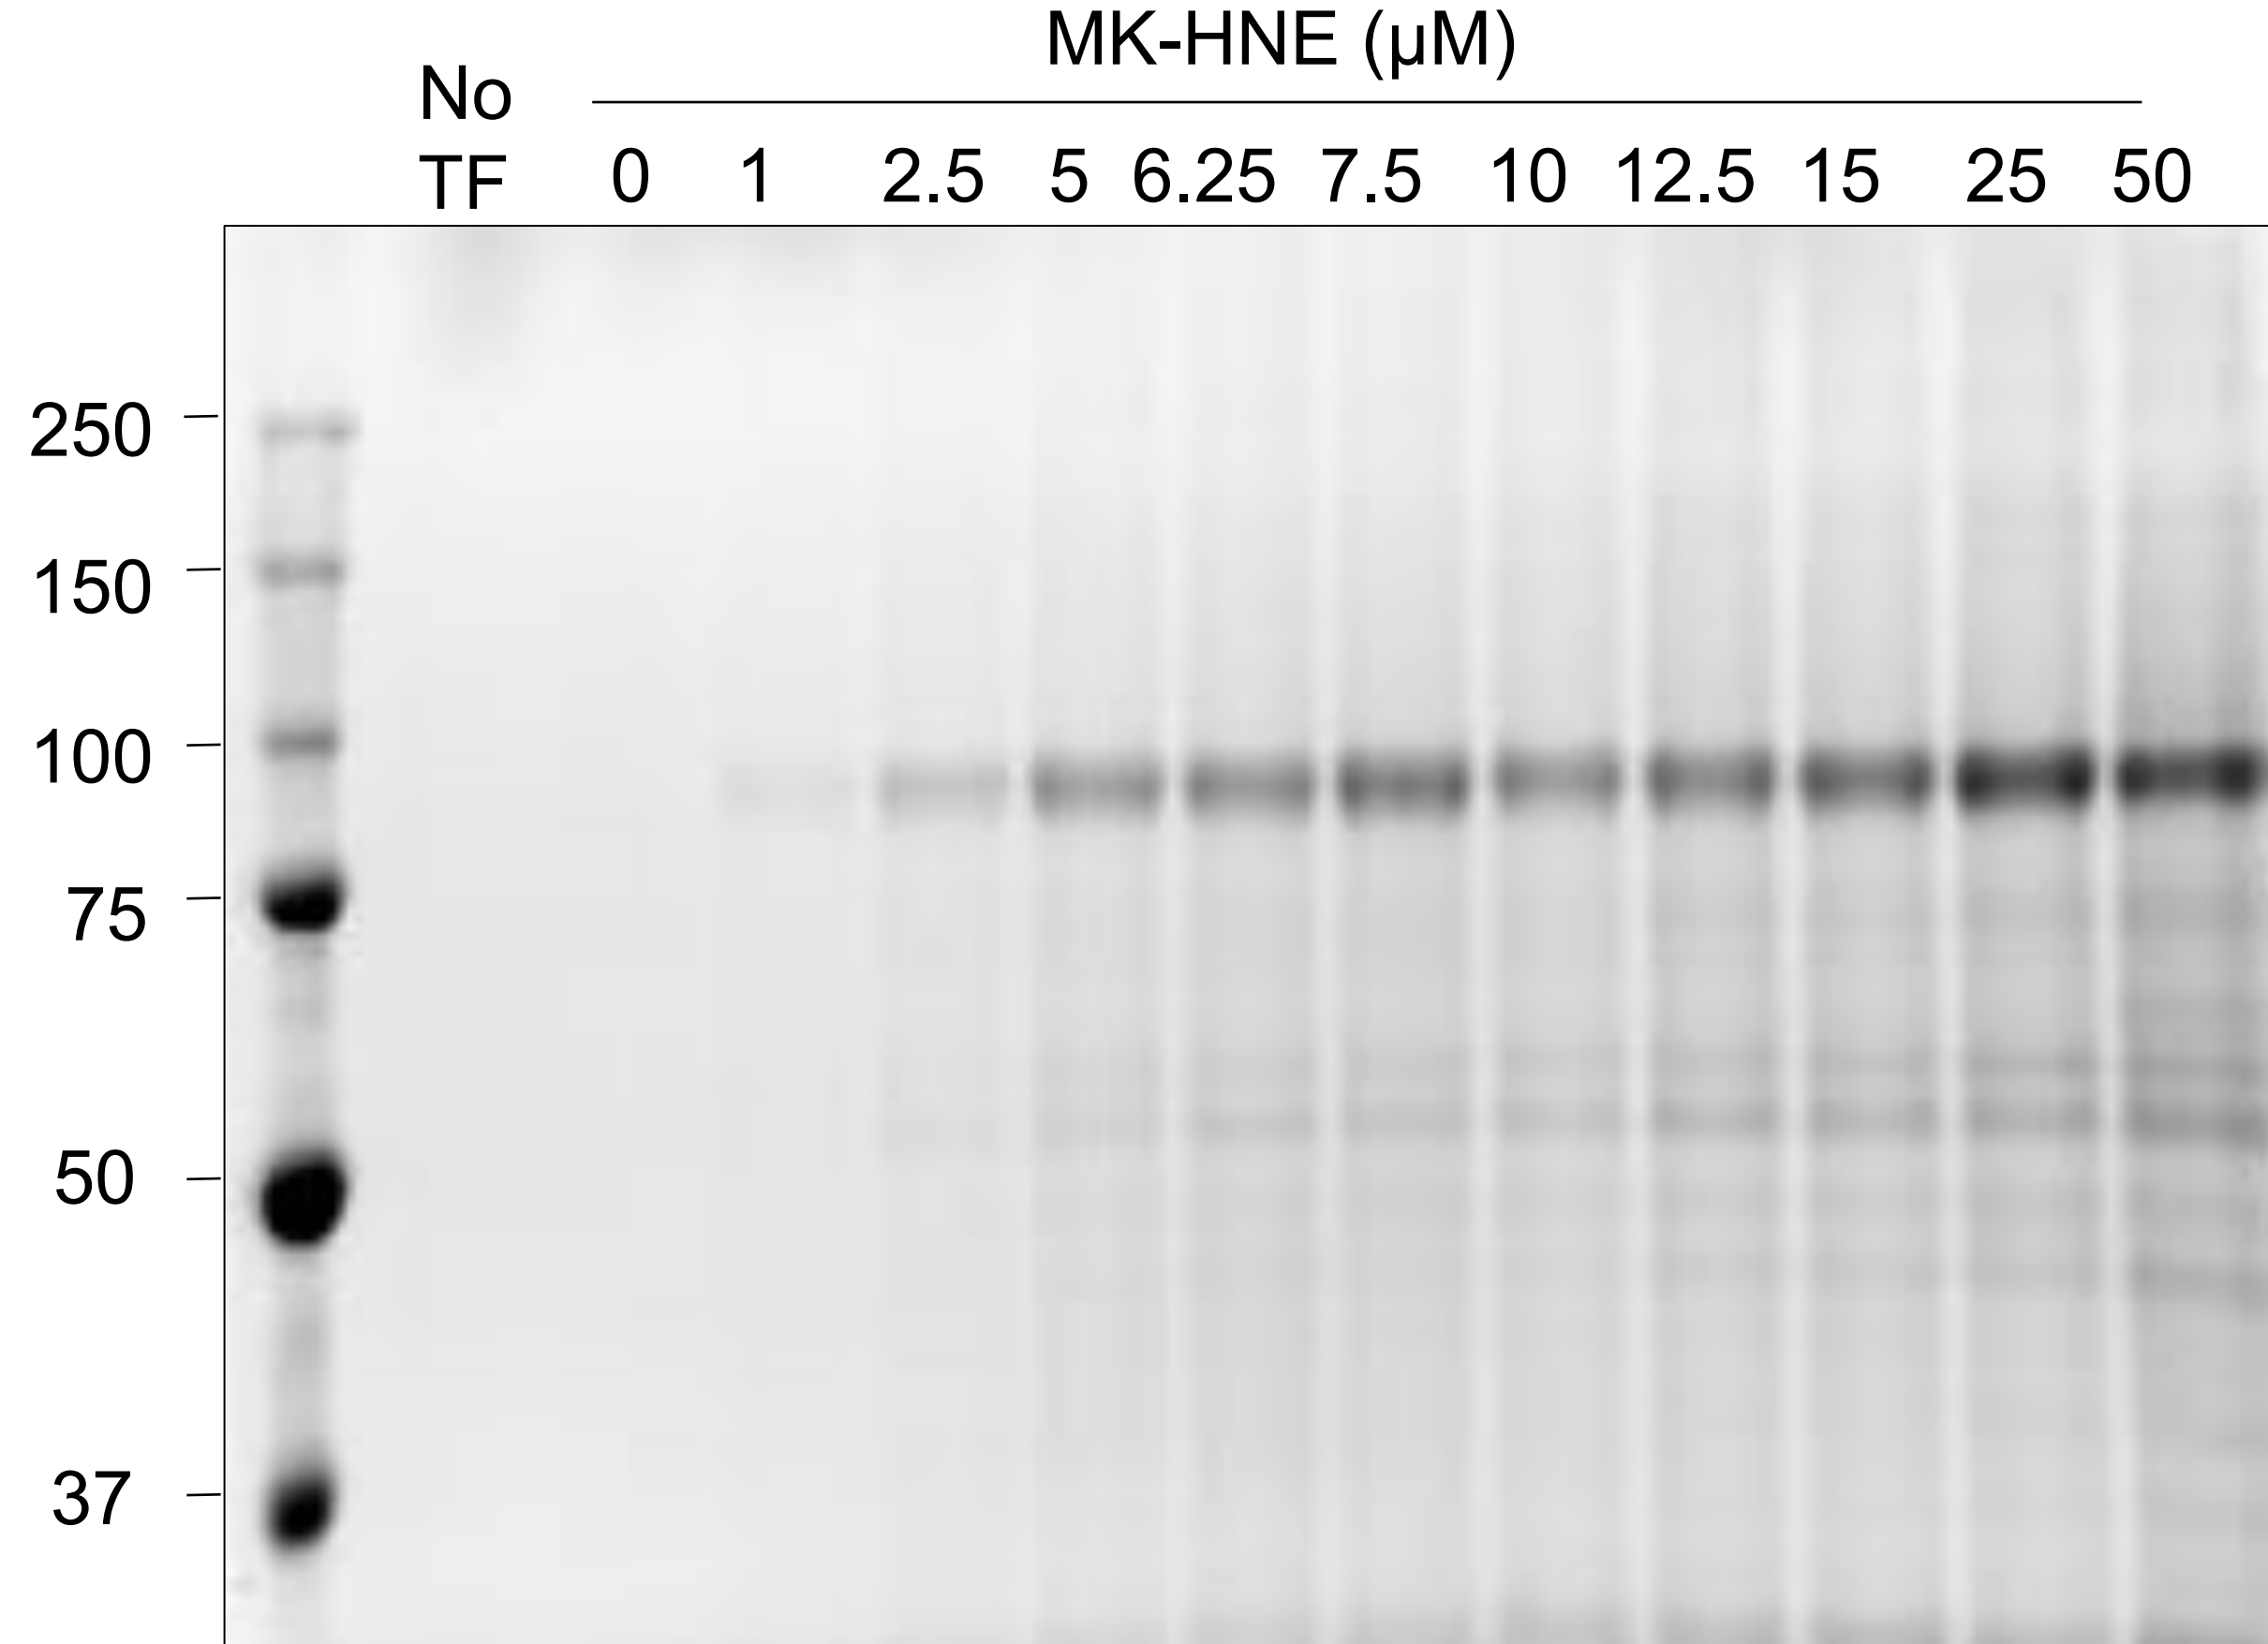

Cy5 (Halo-Akt3)

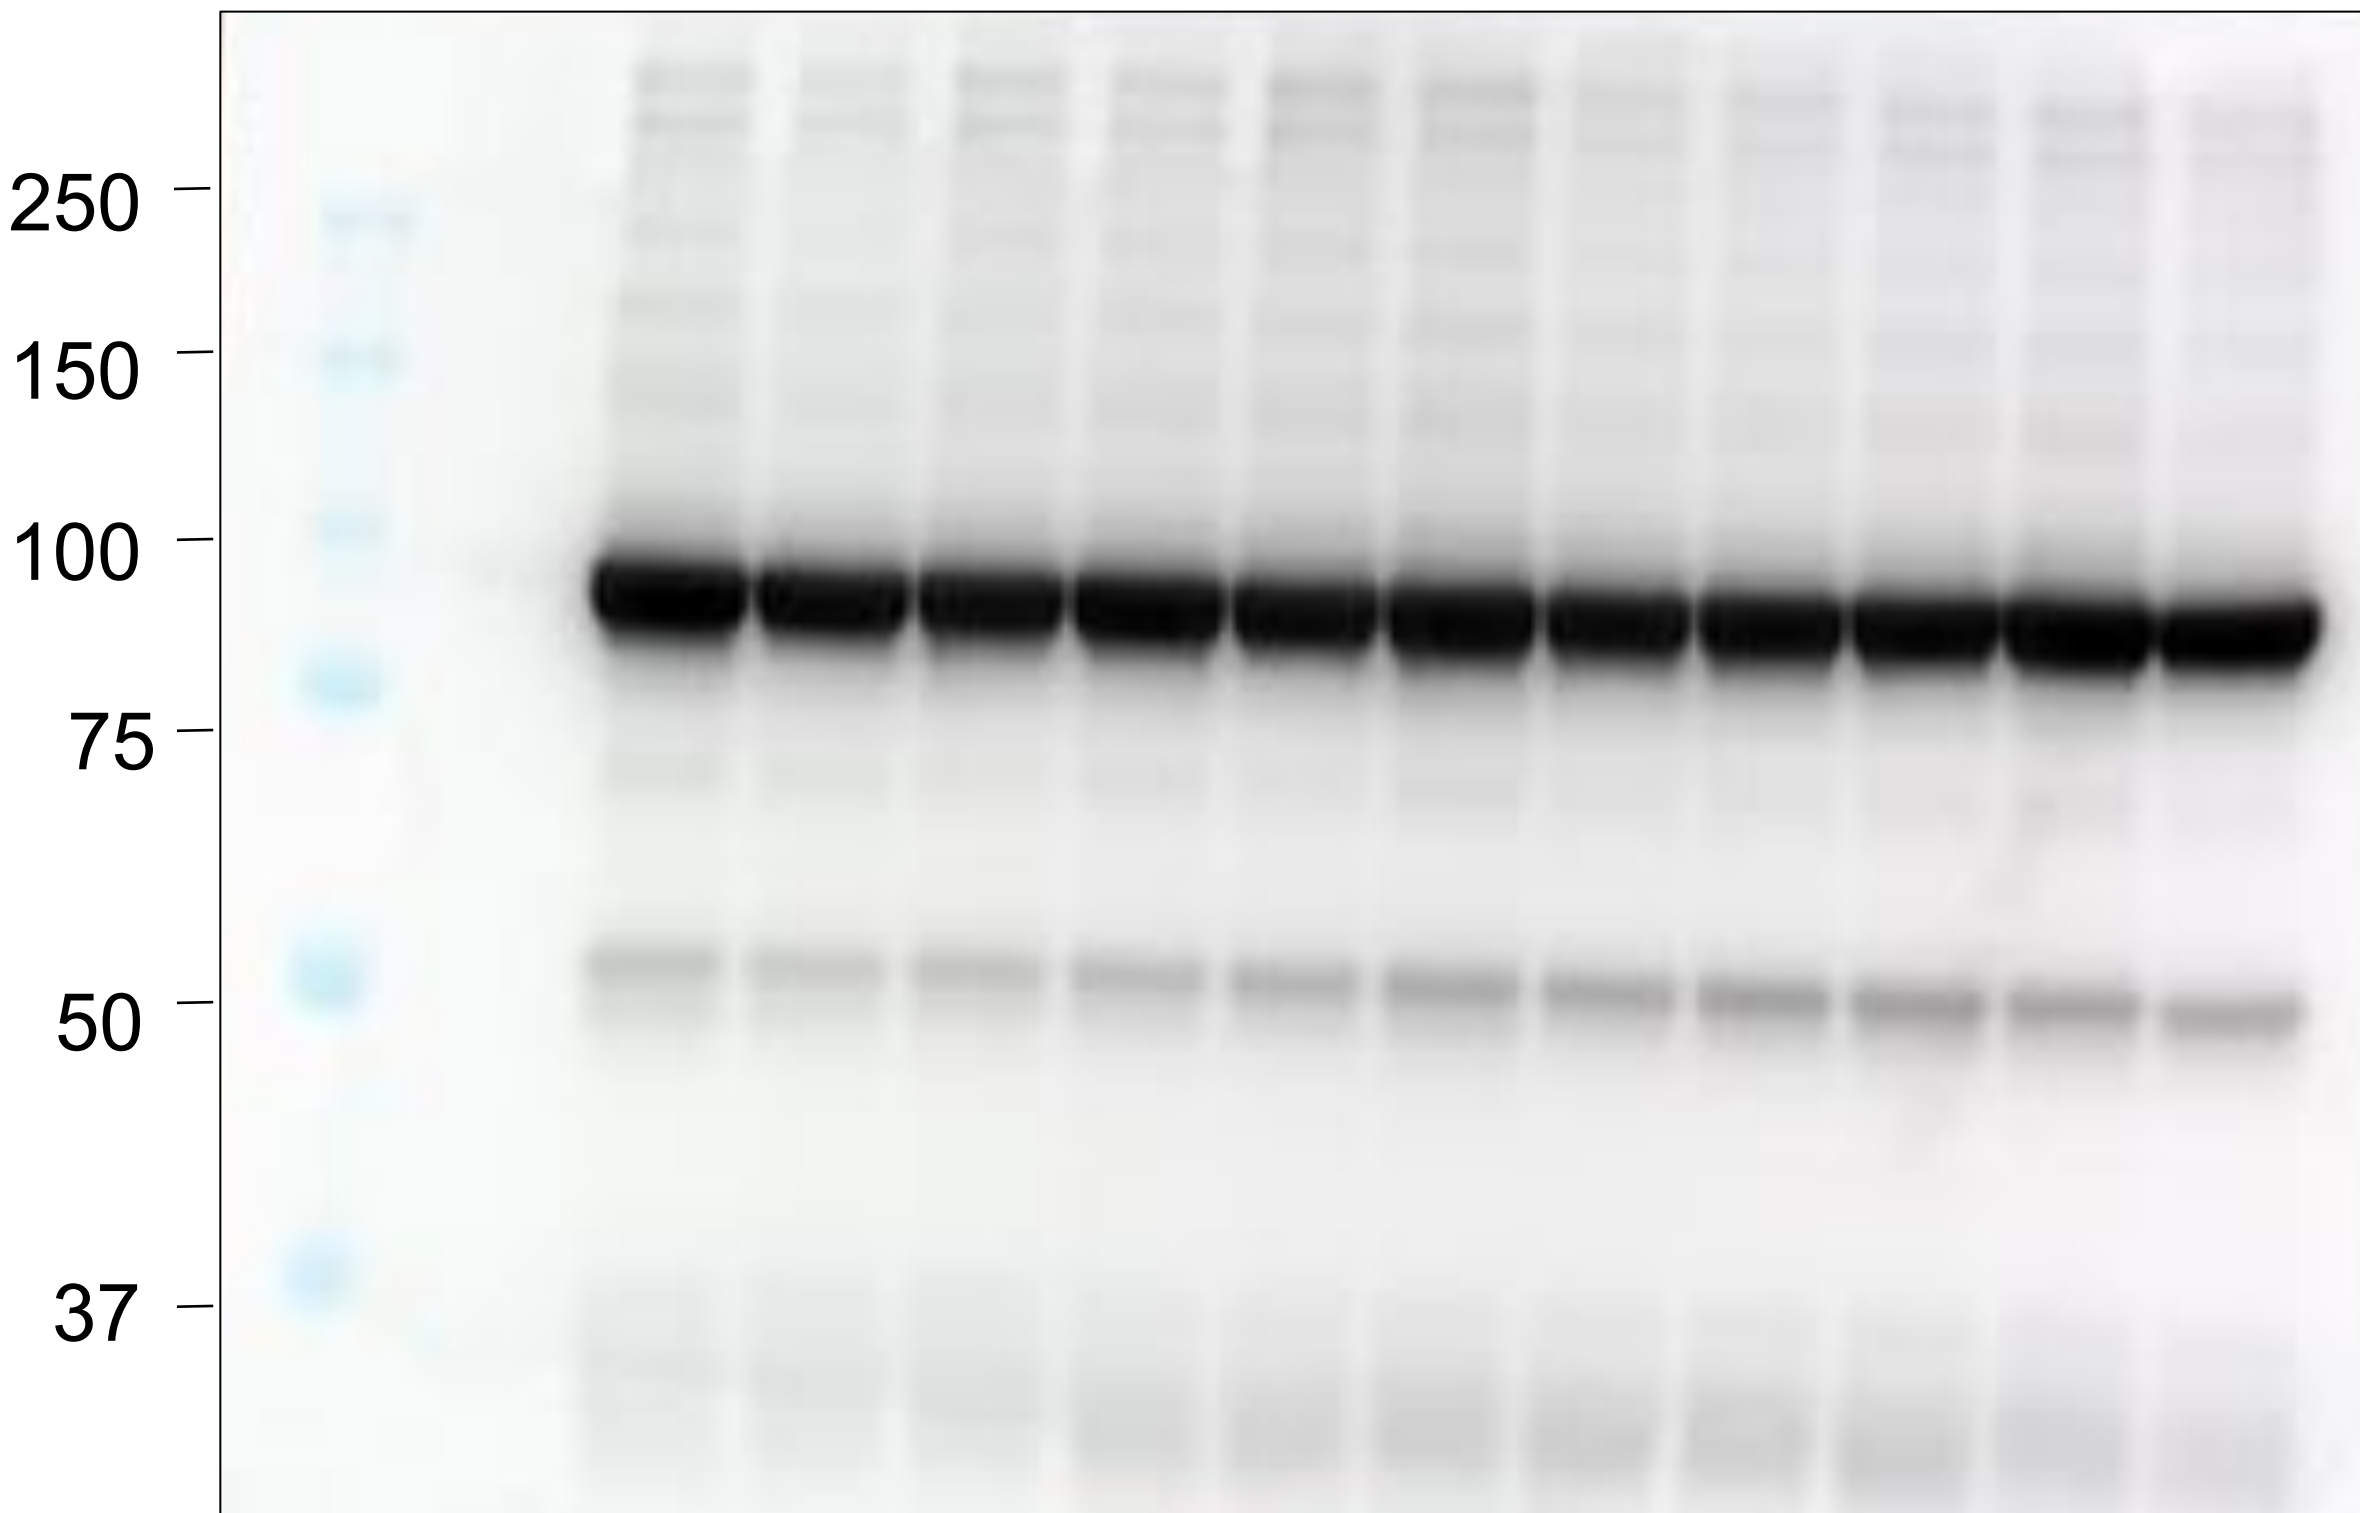

anti-Halo

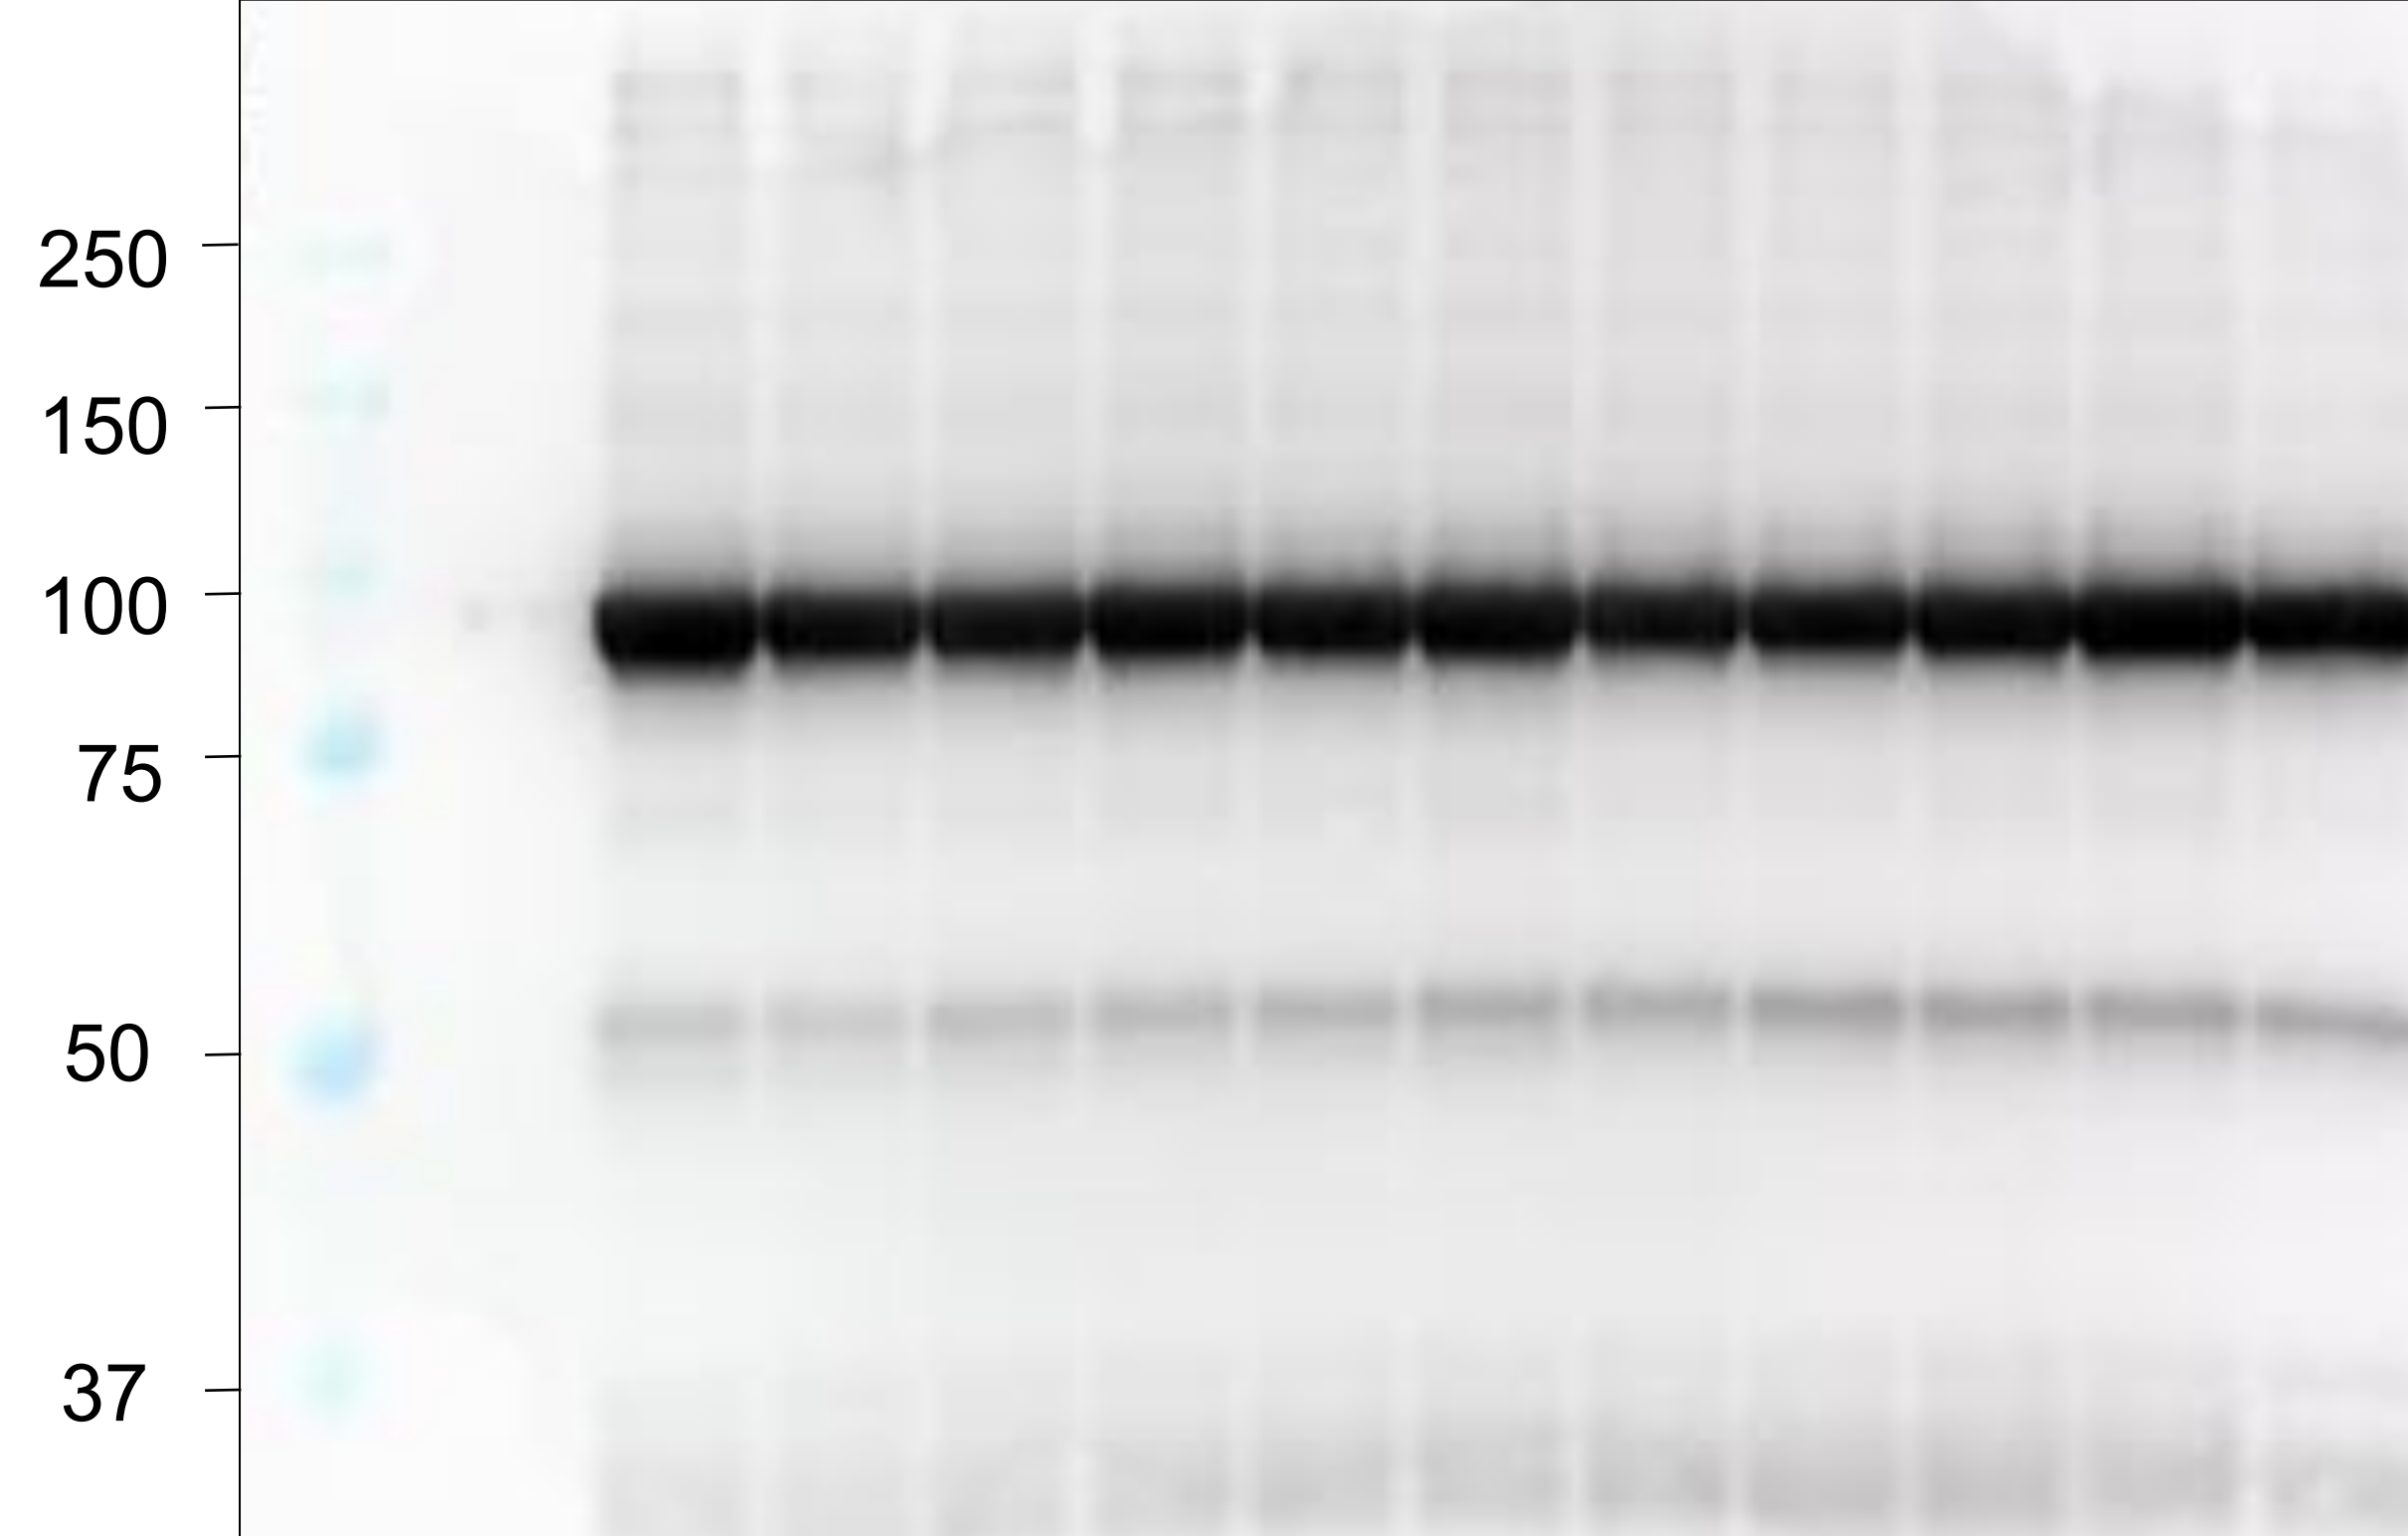

anti-Halo

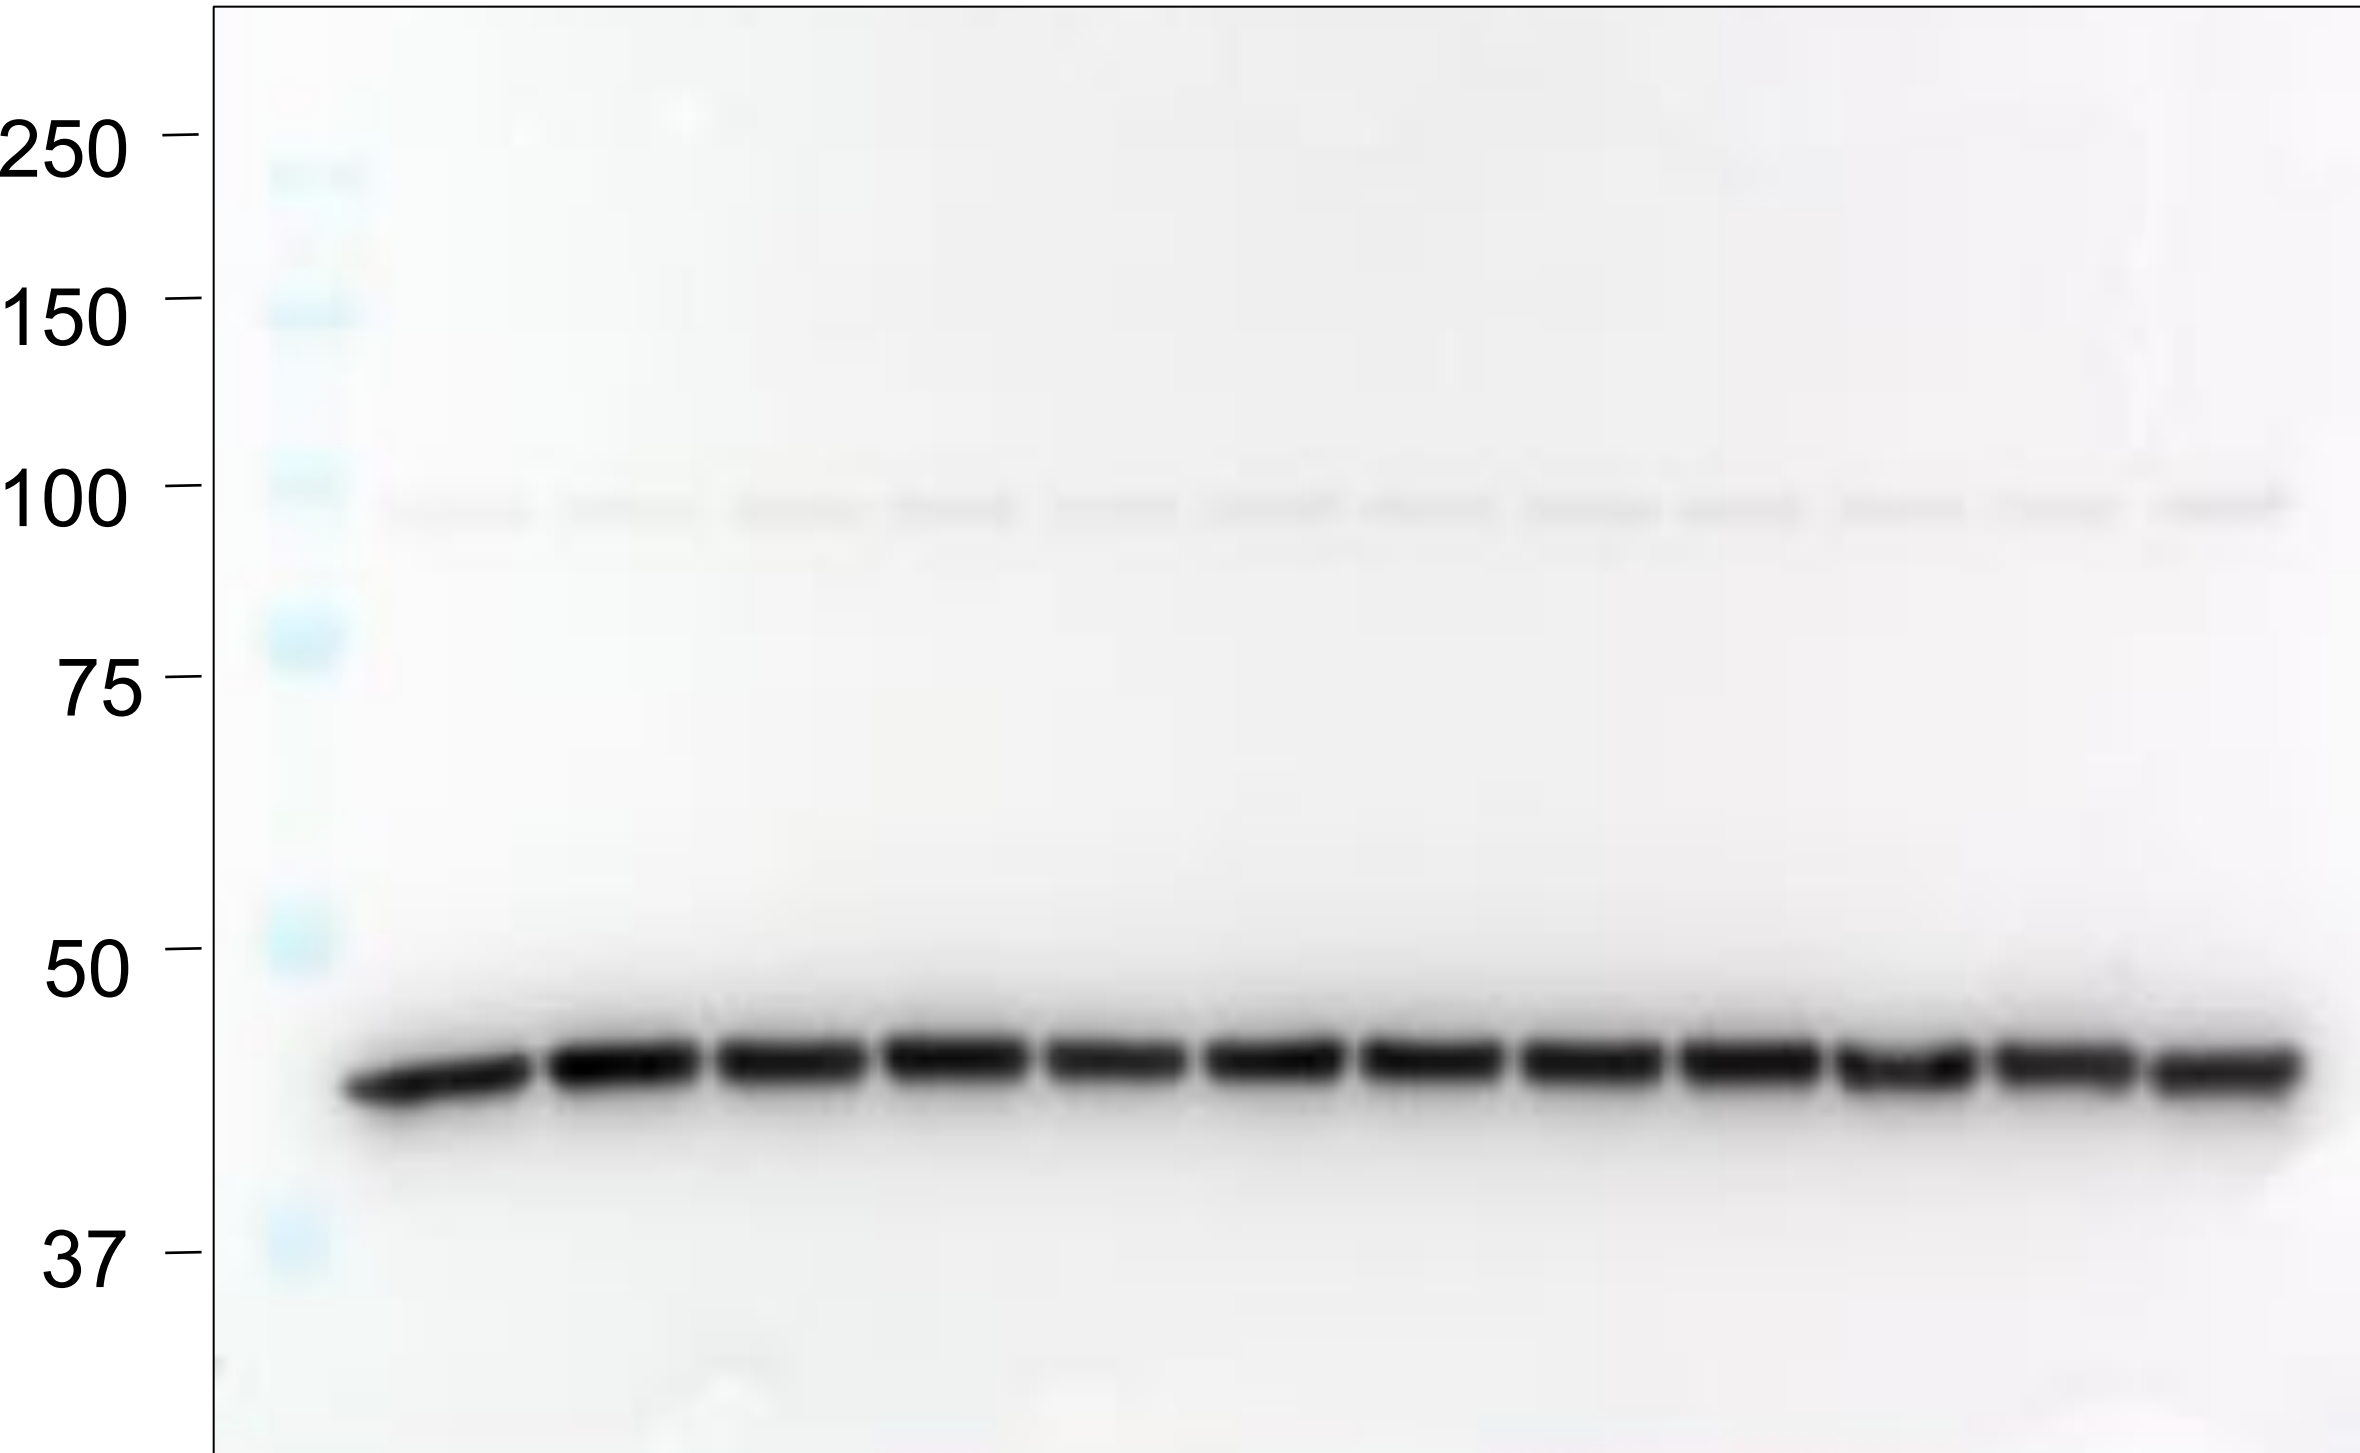

anti-actin

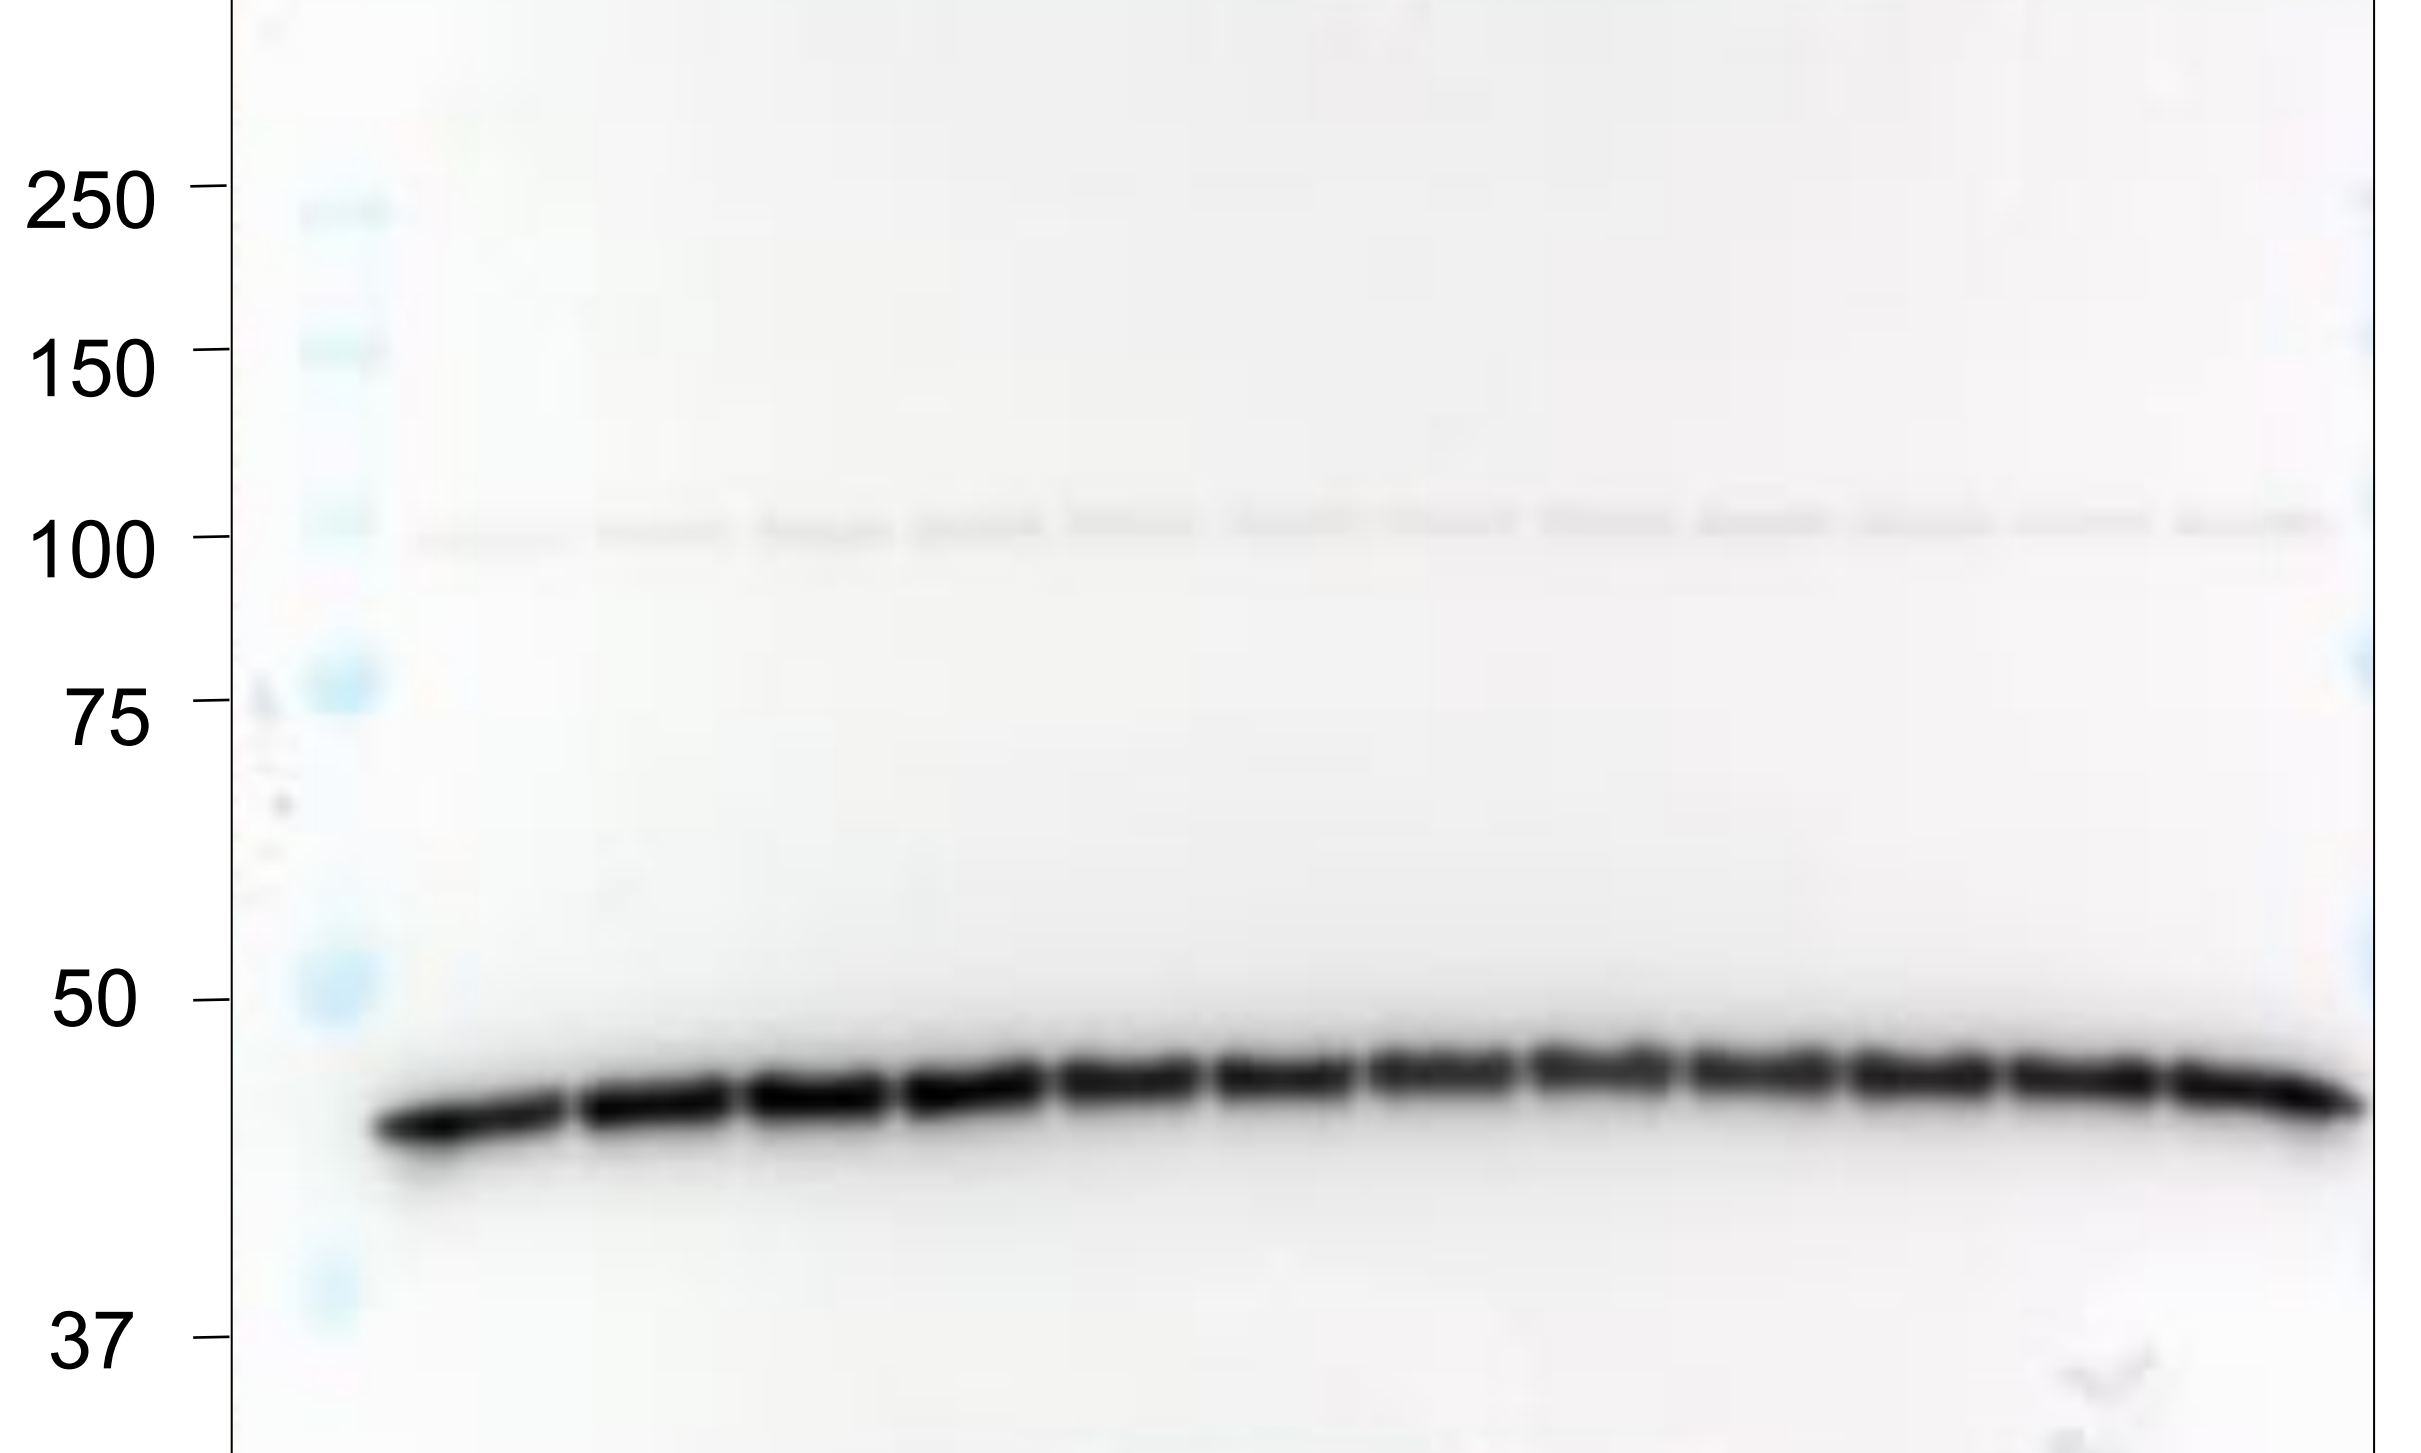

anti-actin



**Representative replicates related to data in Supplemental Figure S2**

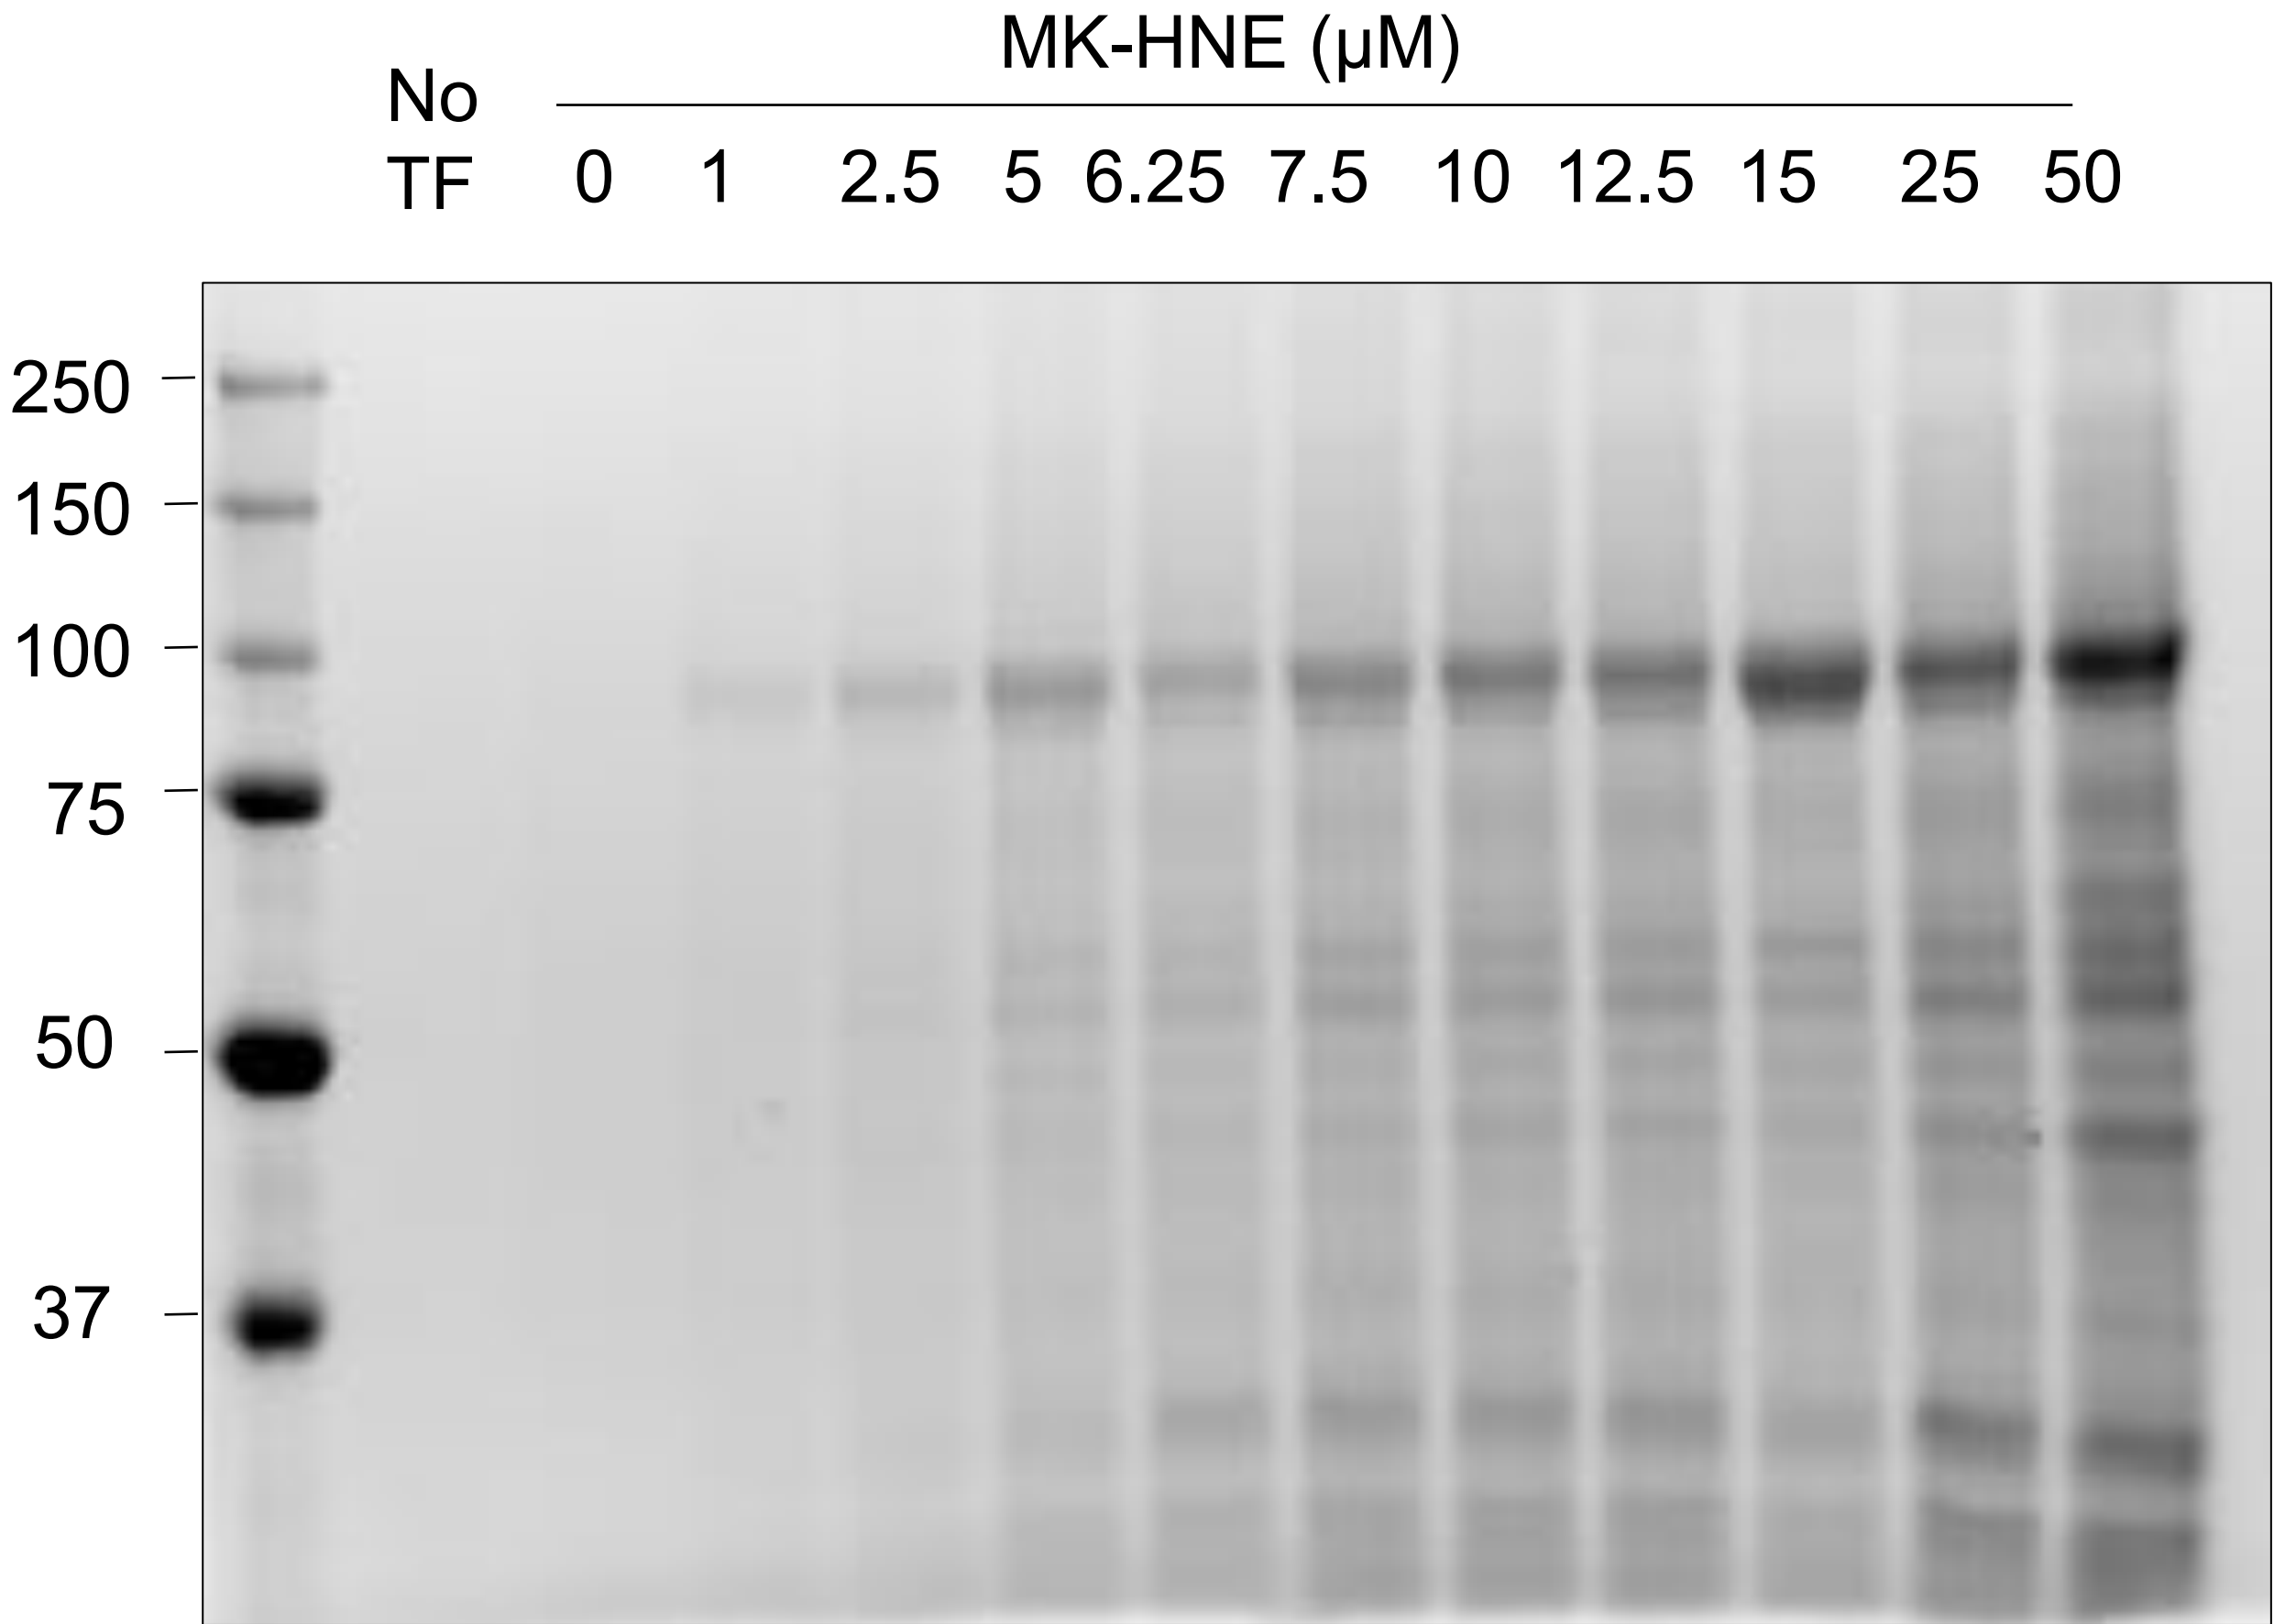

Cy5 (Halo-Akt2)

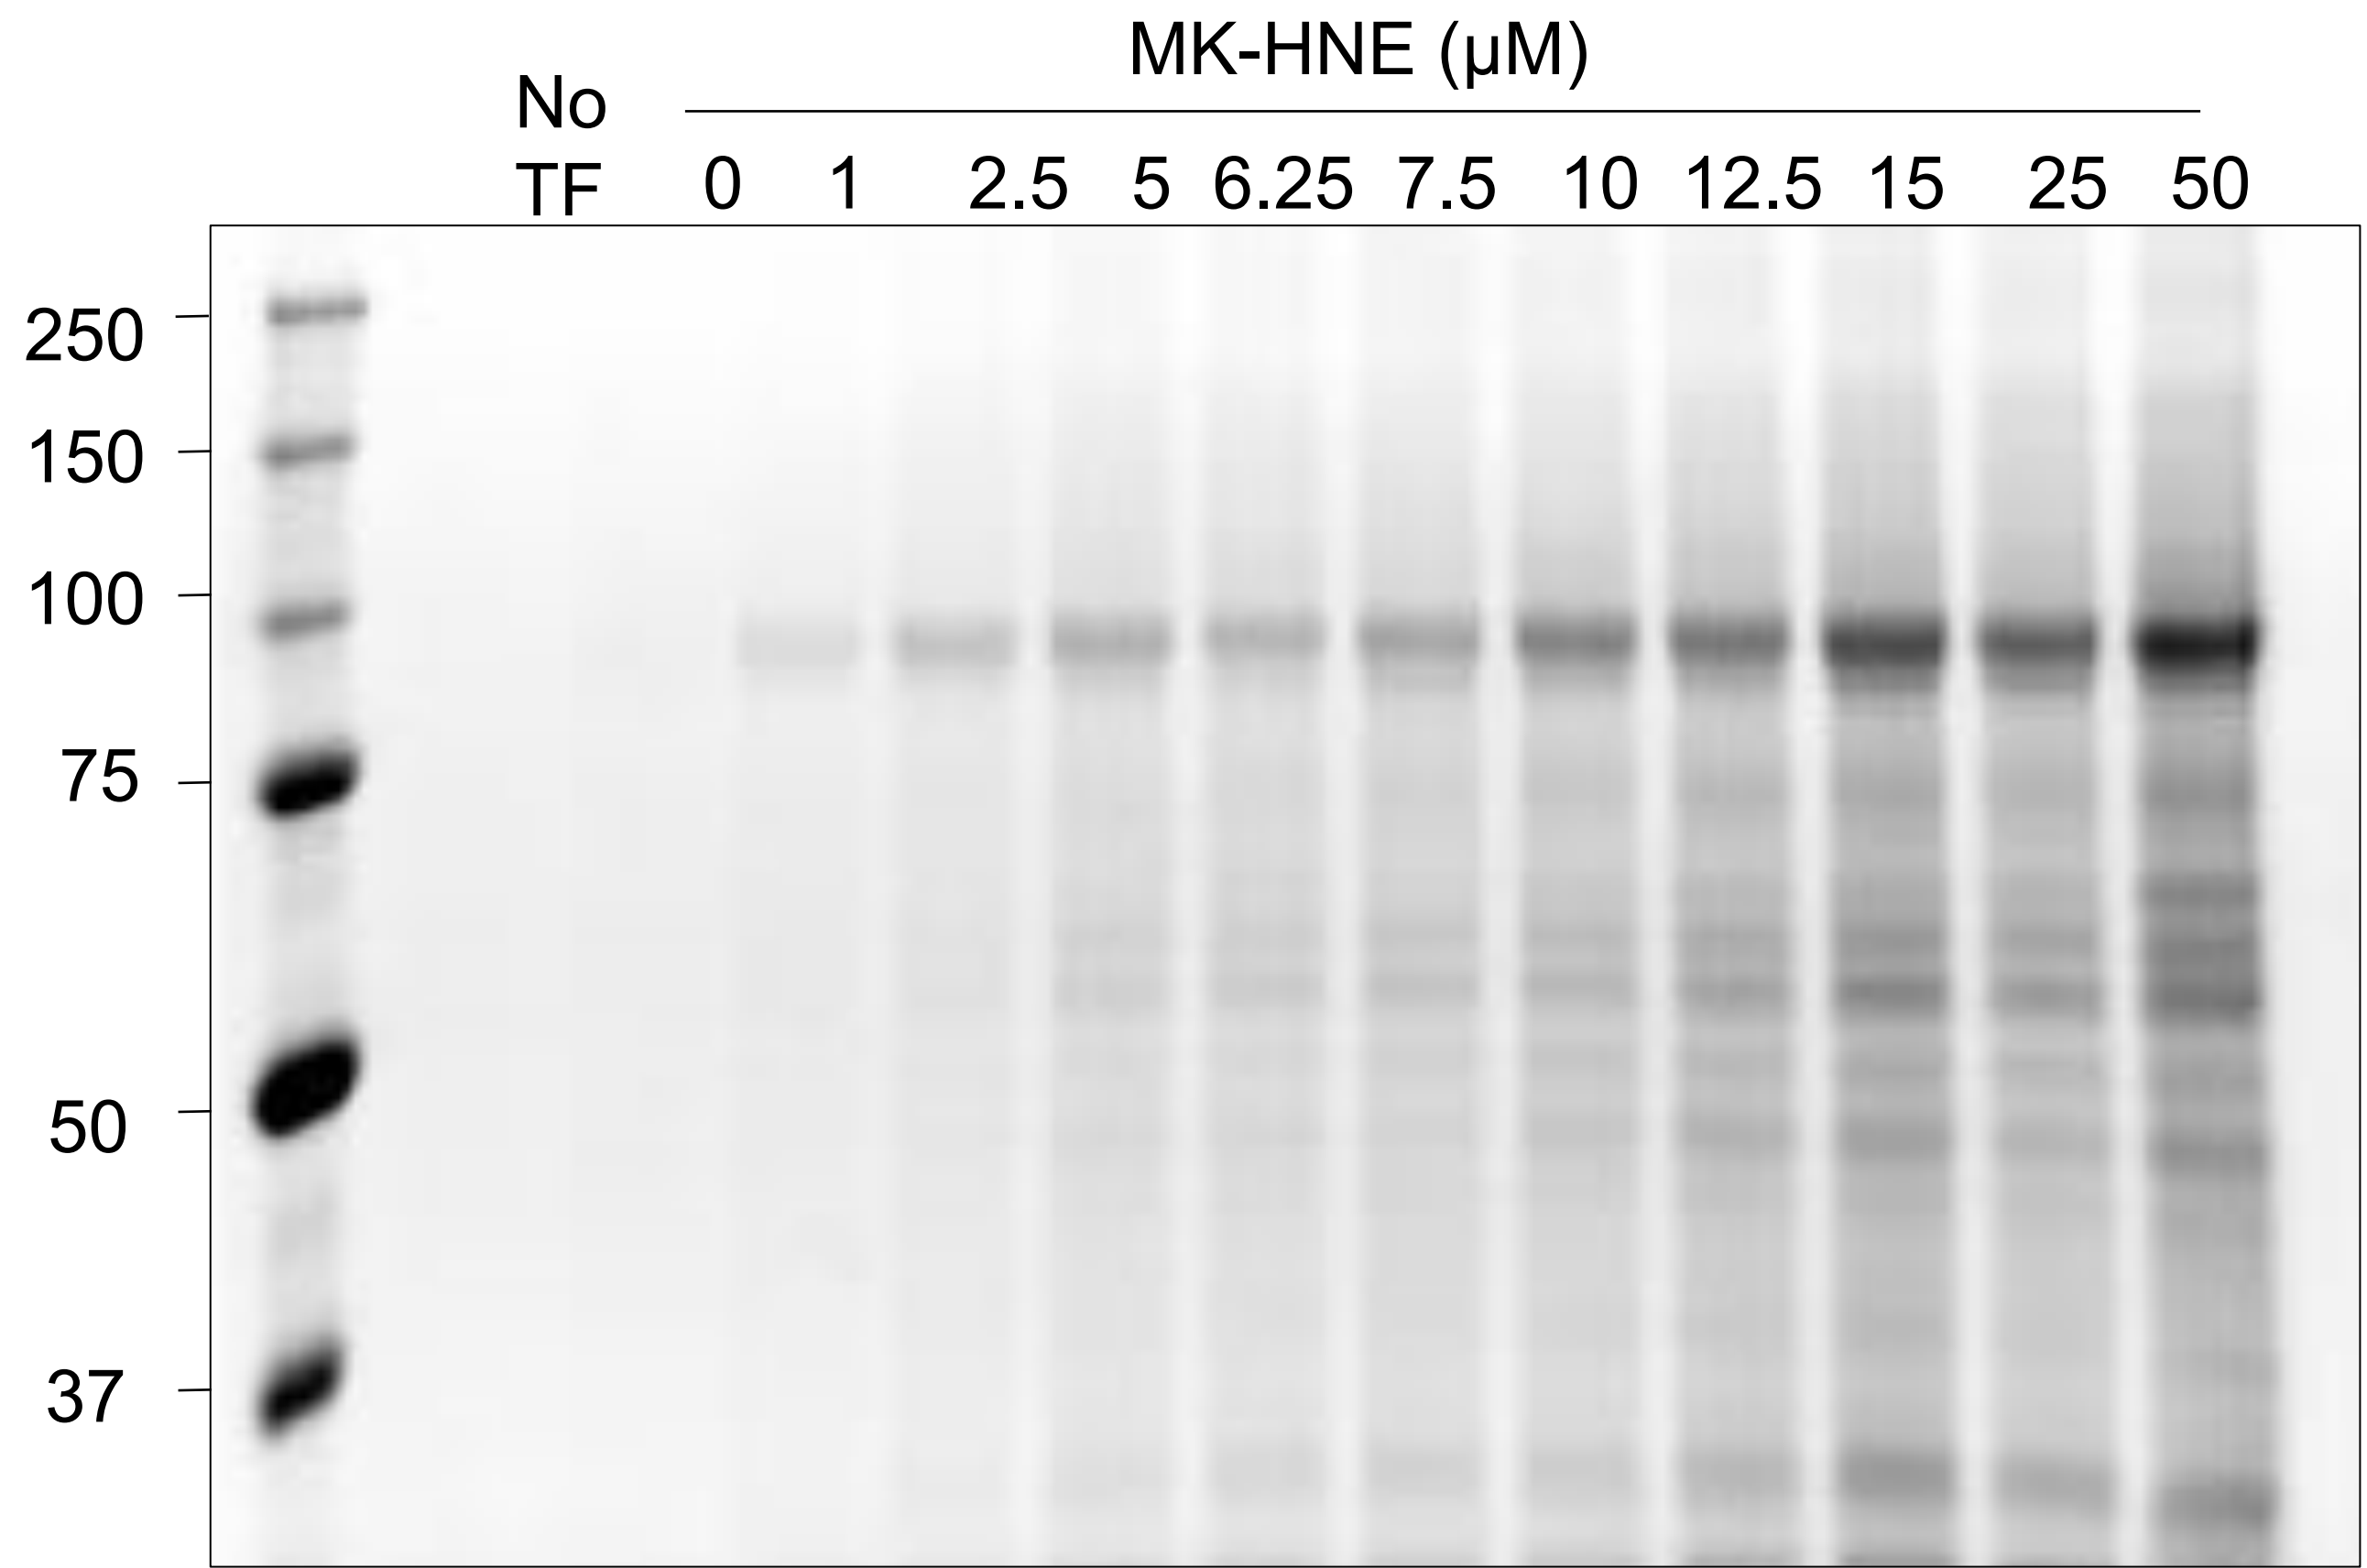

Cy5 (Halo-Akt2)

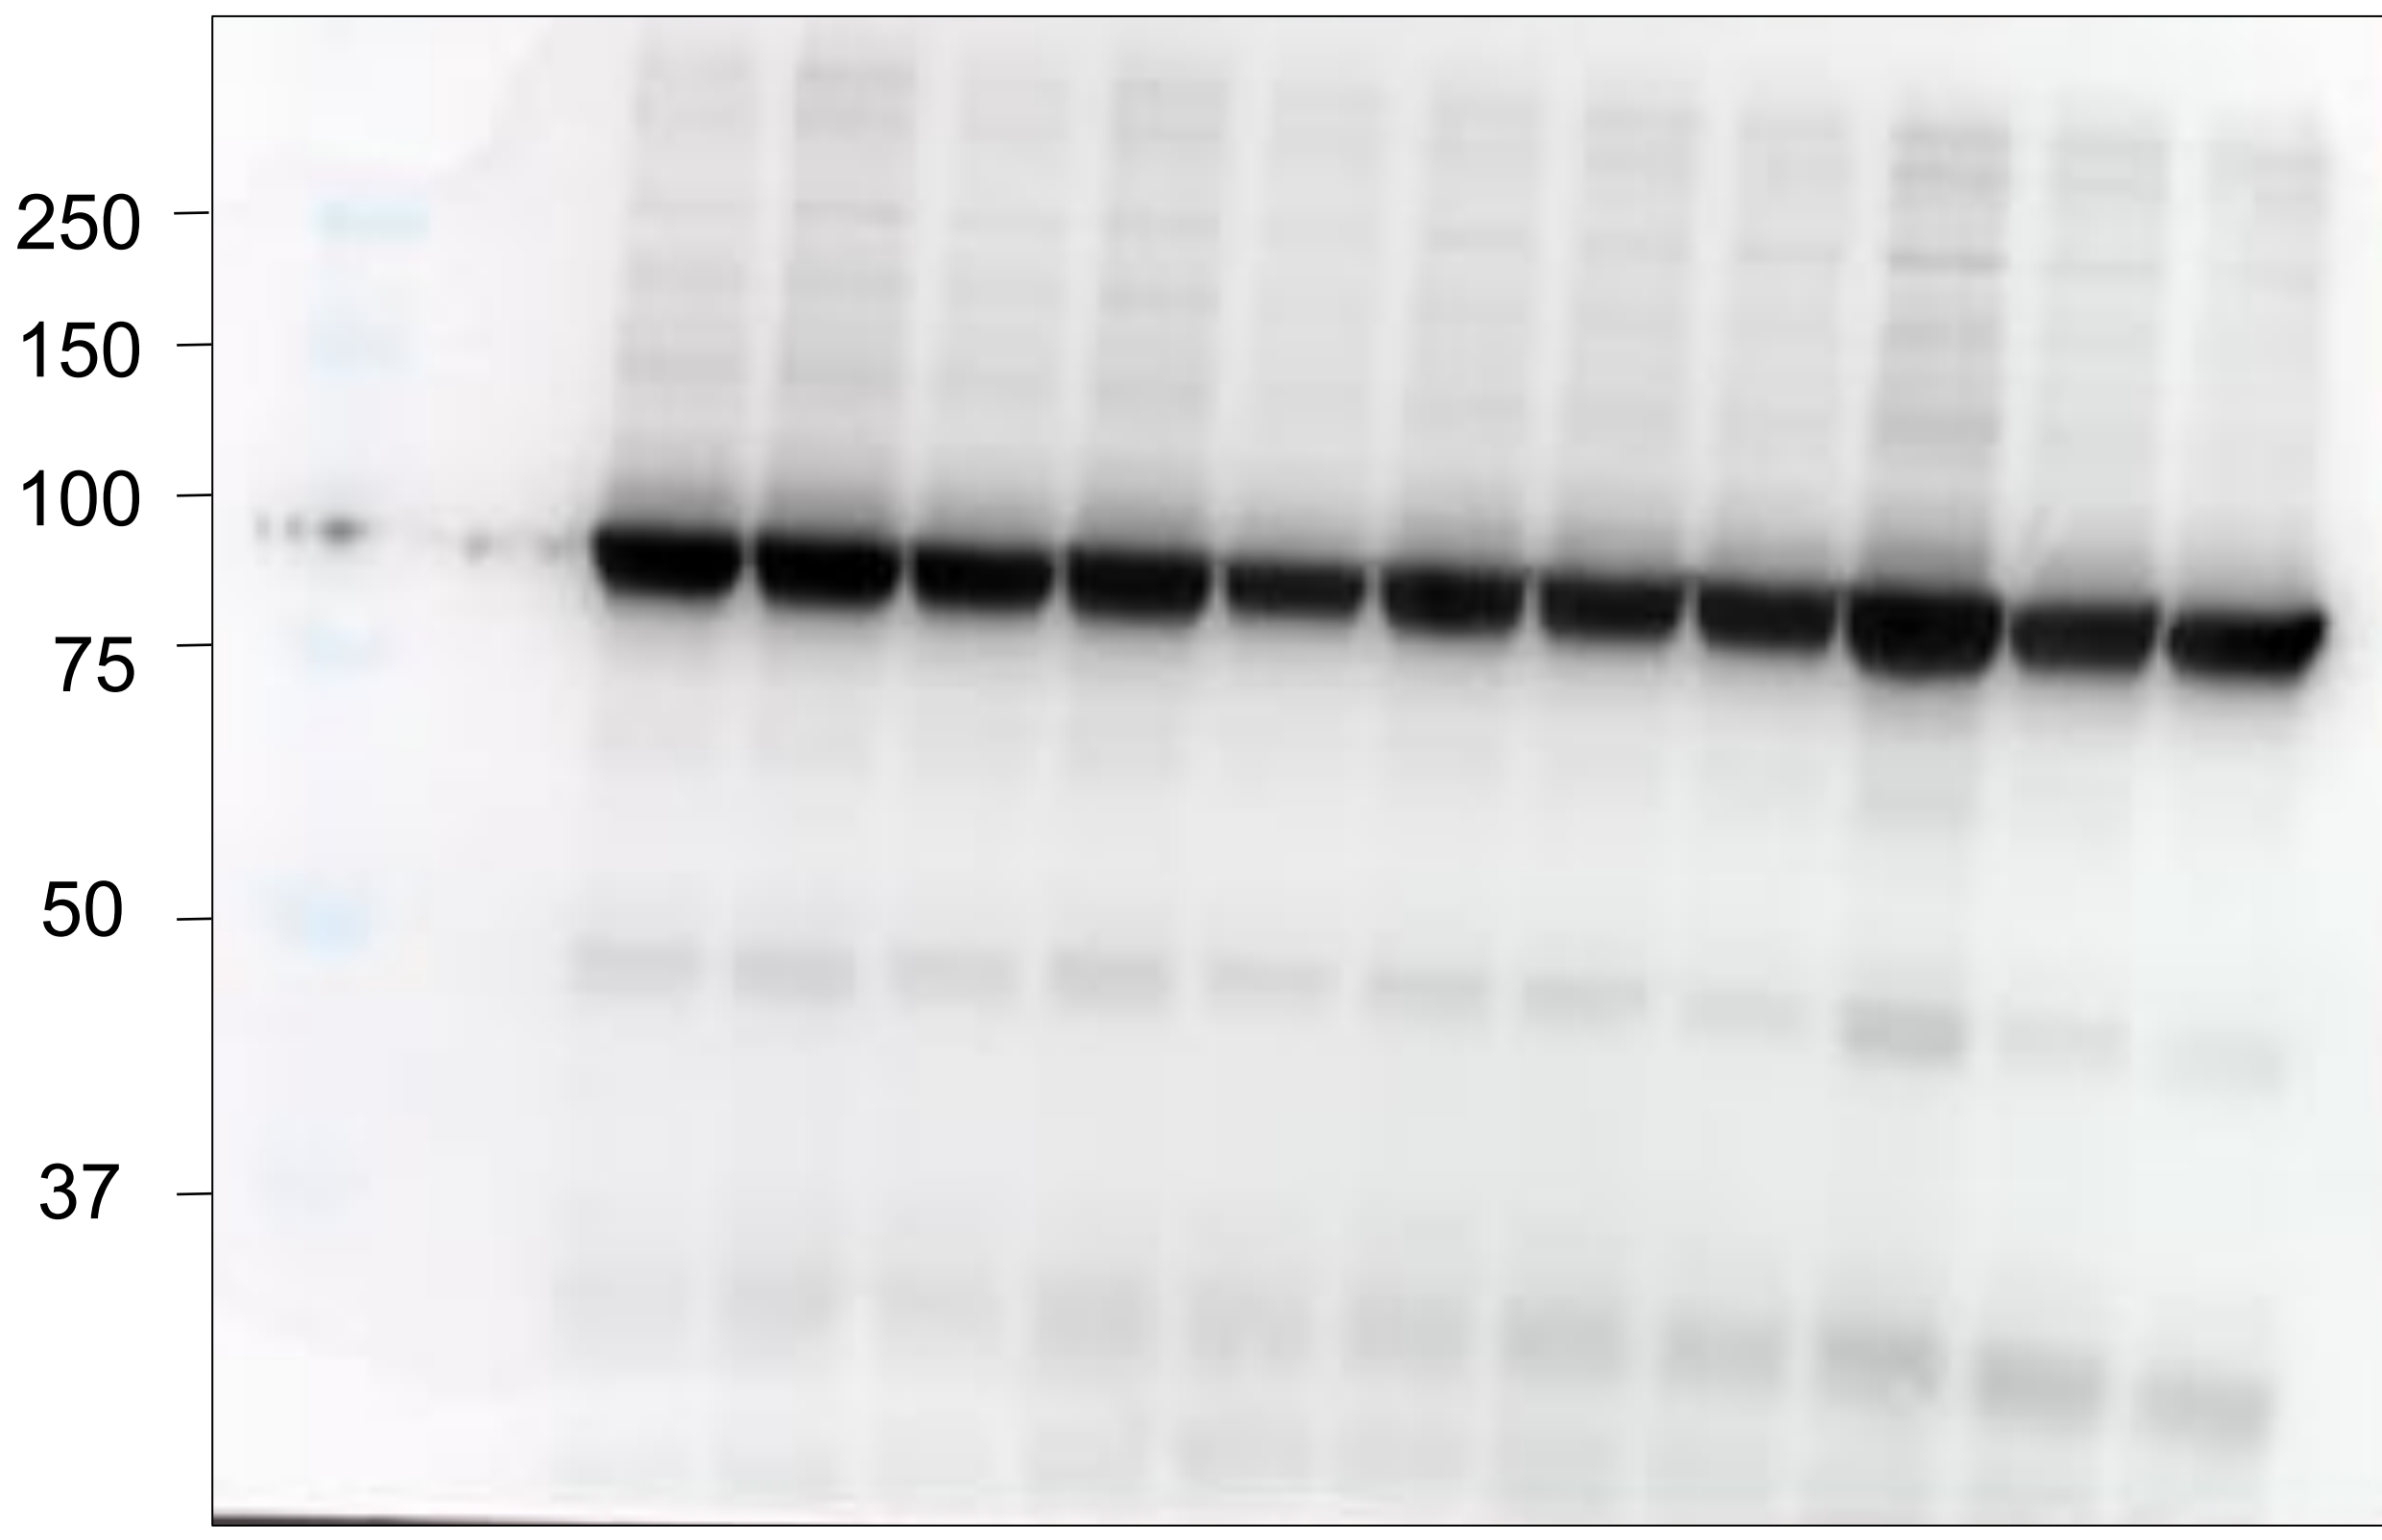

anti-Halo

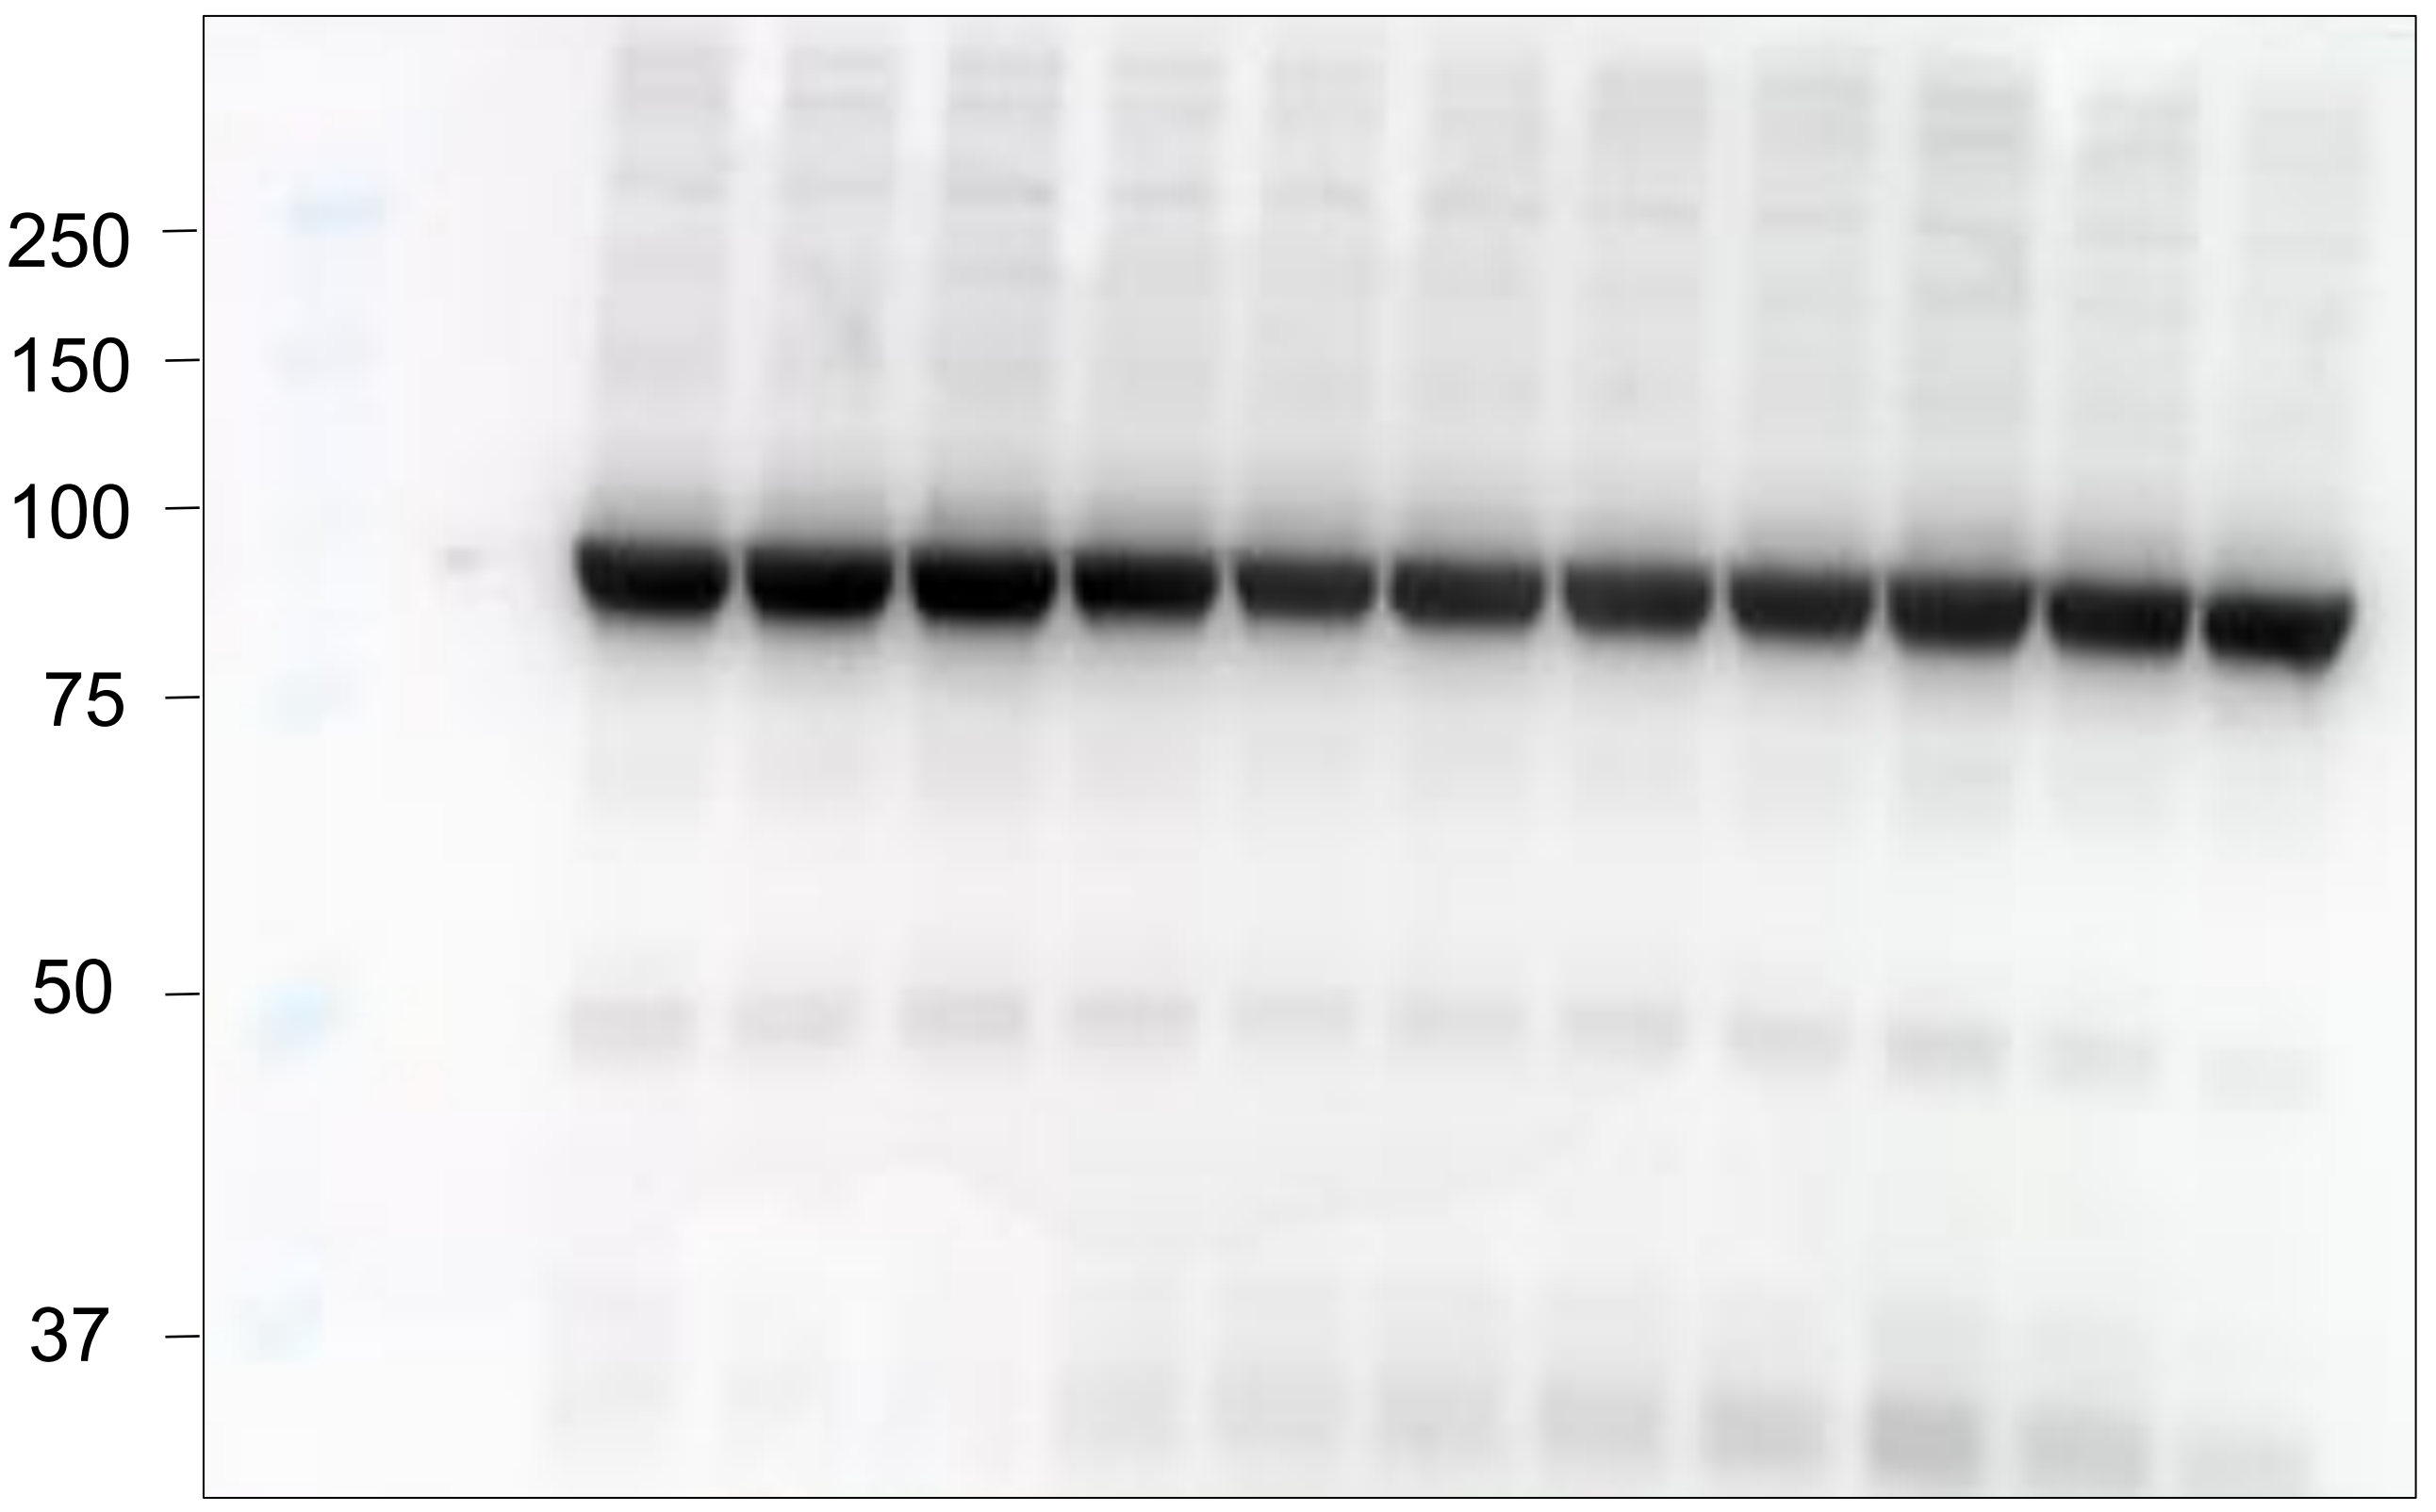

anti-Halo

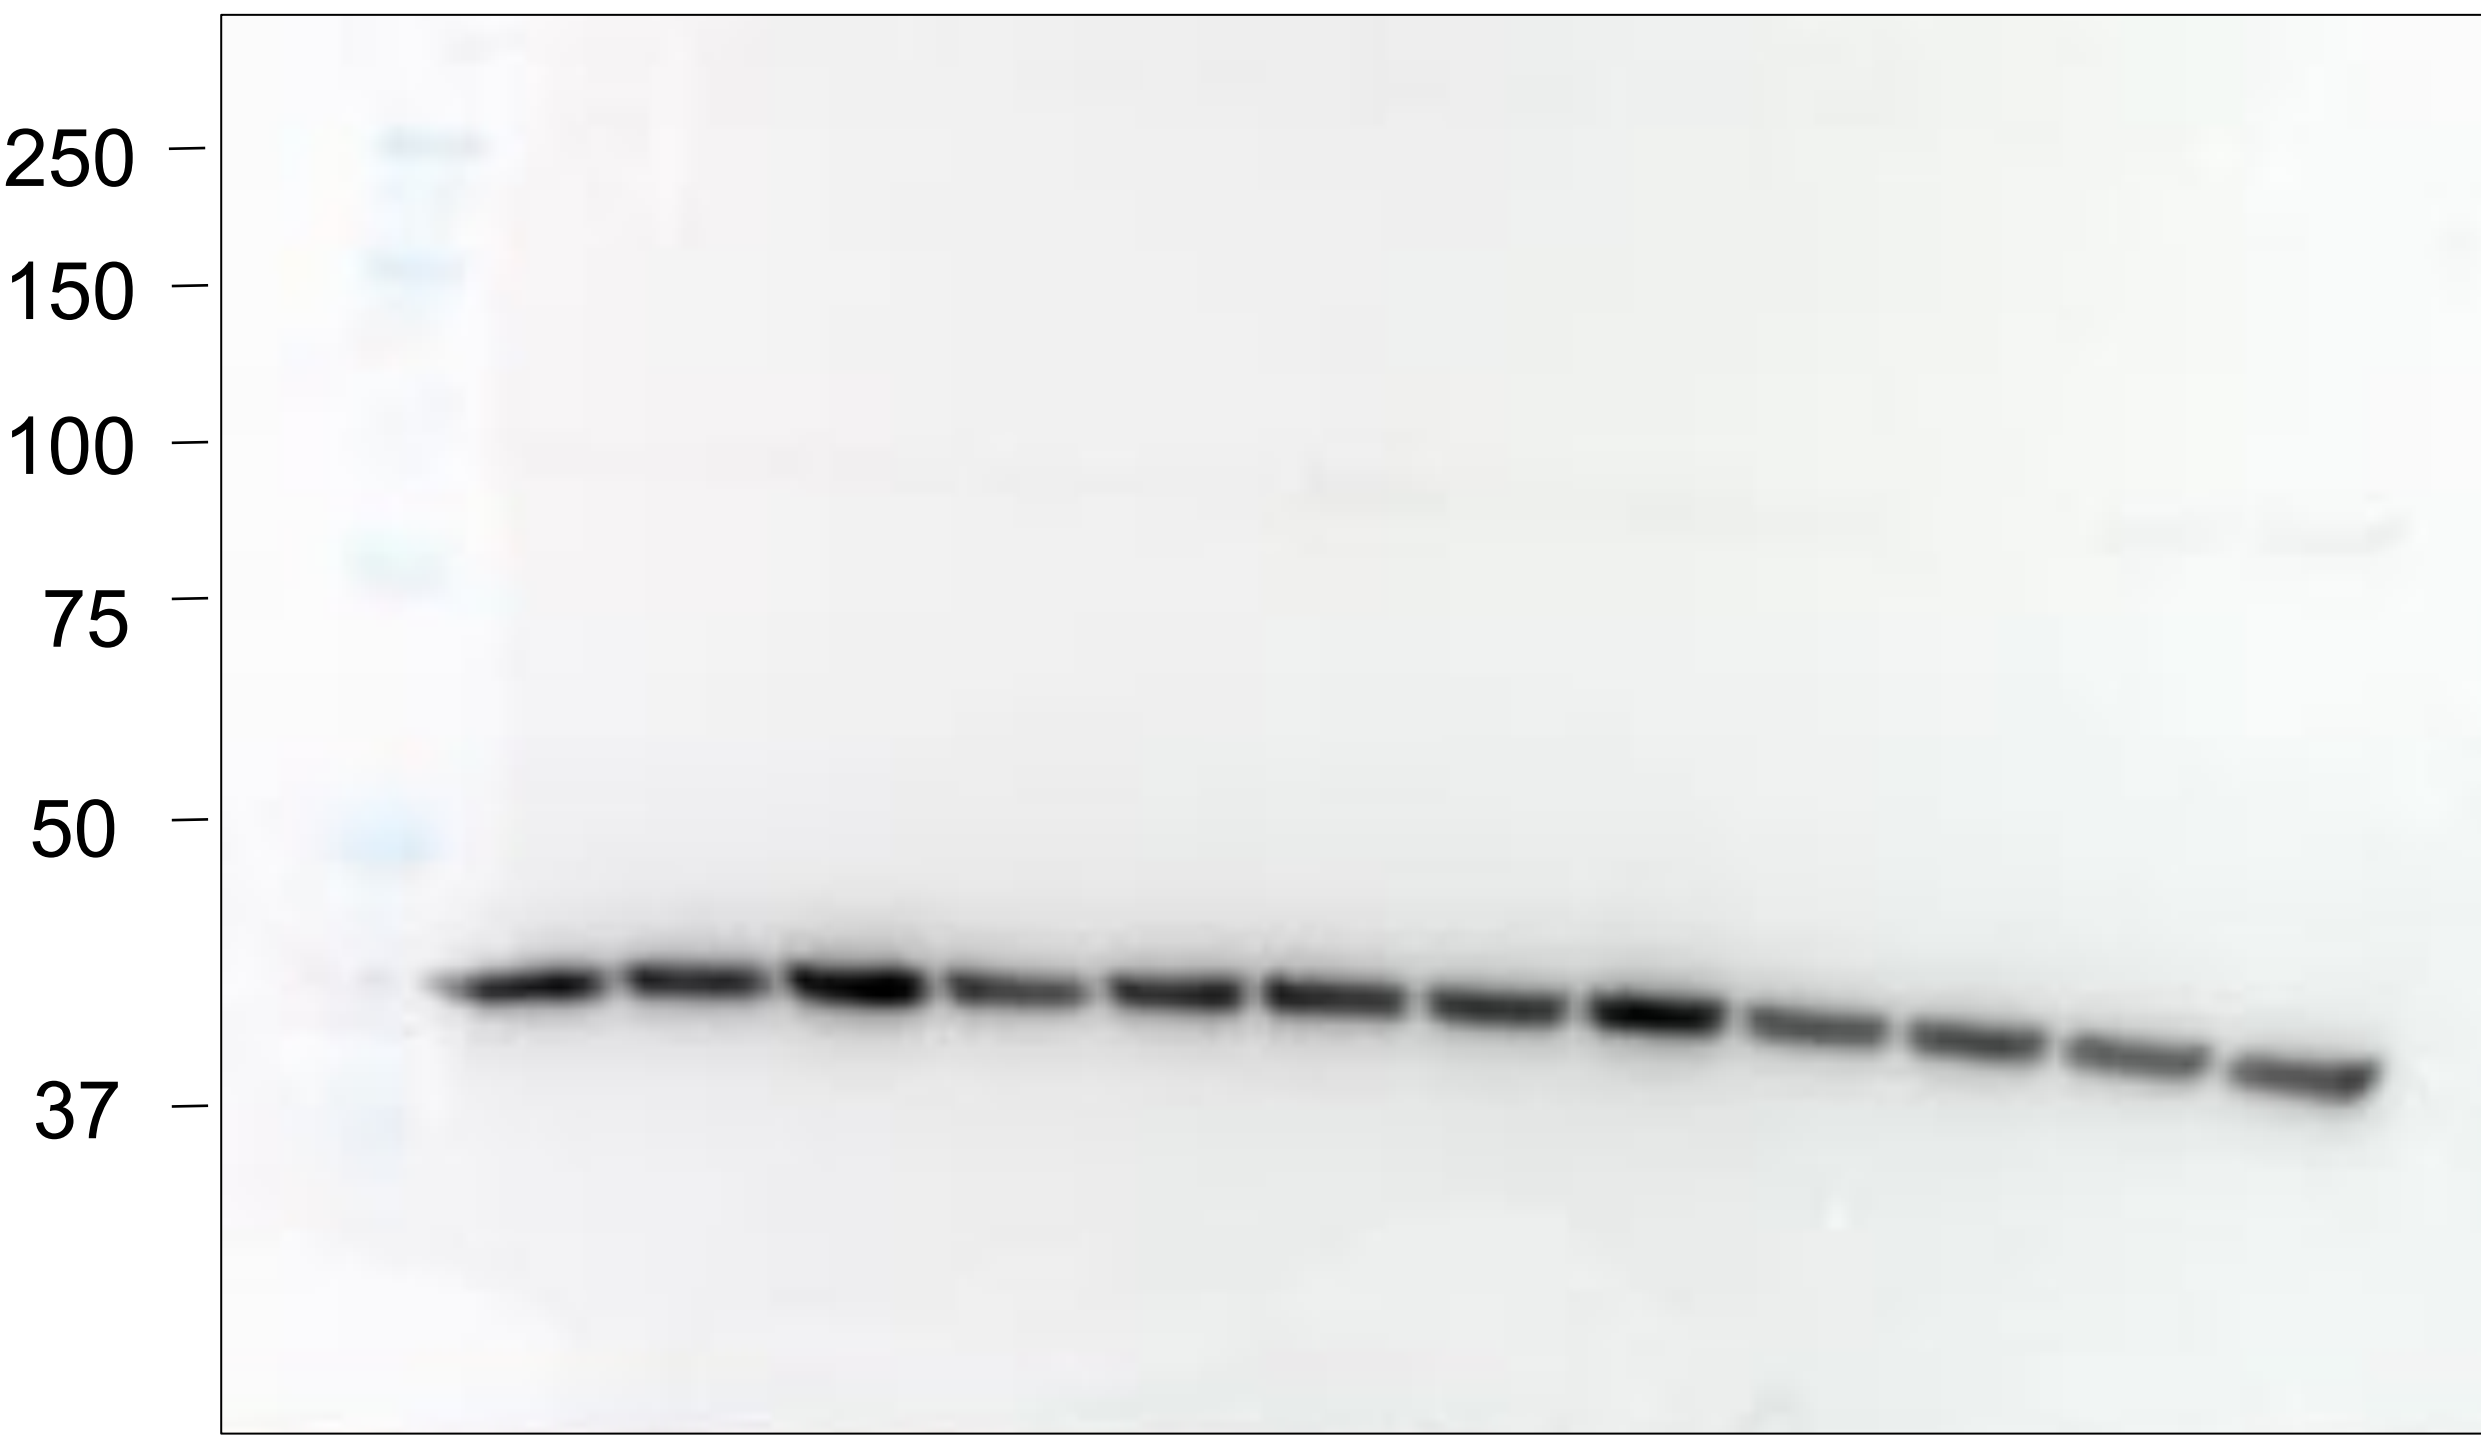

anti-actin

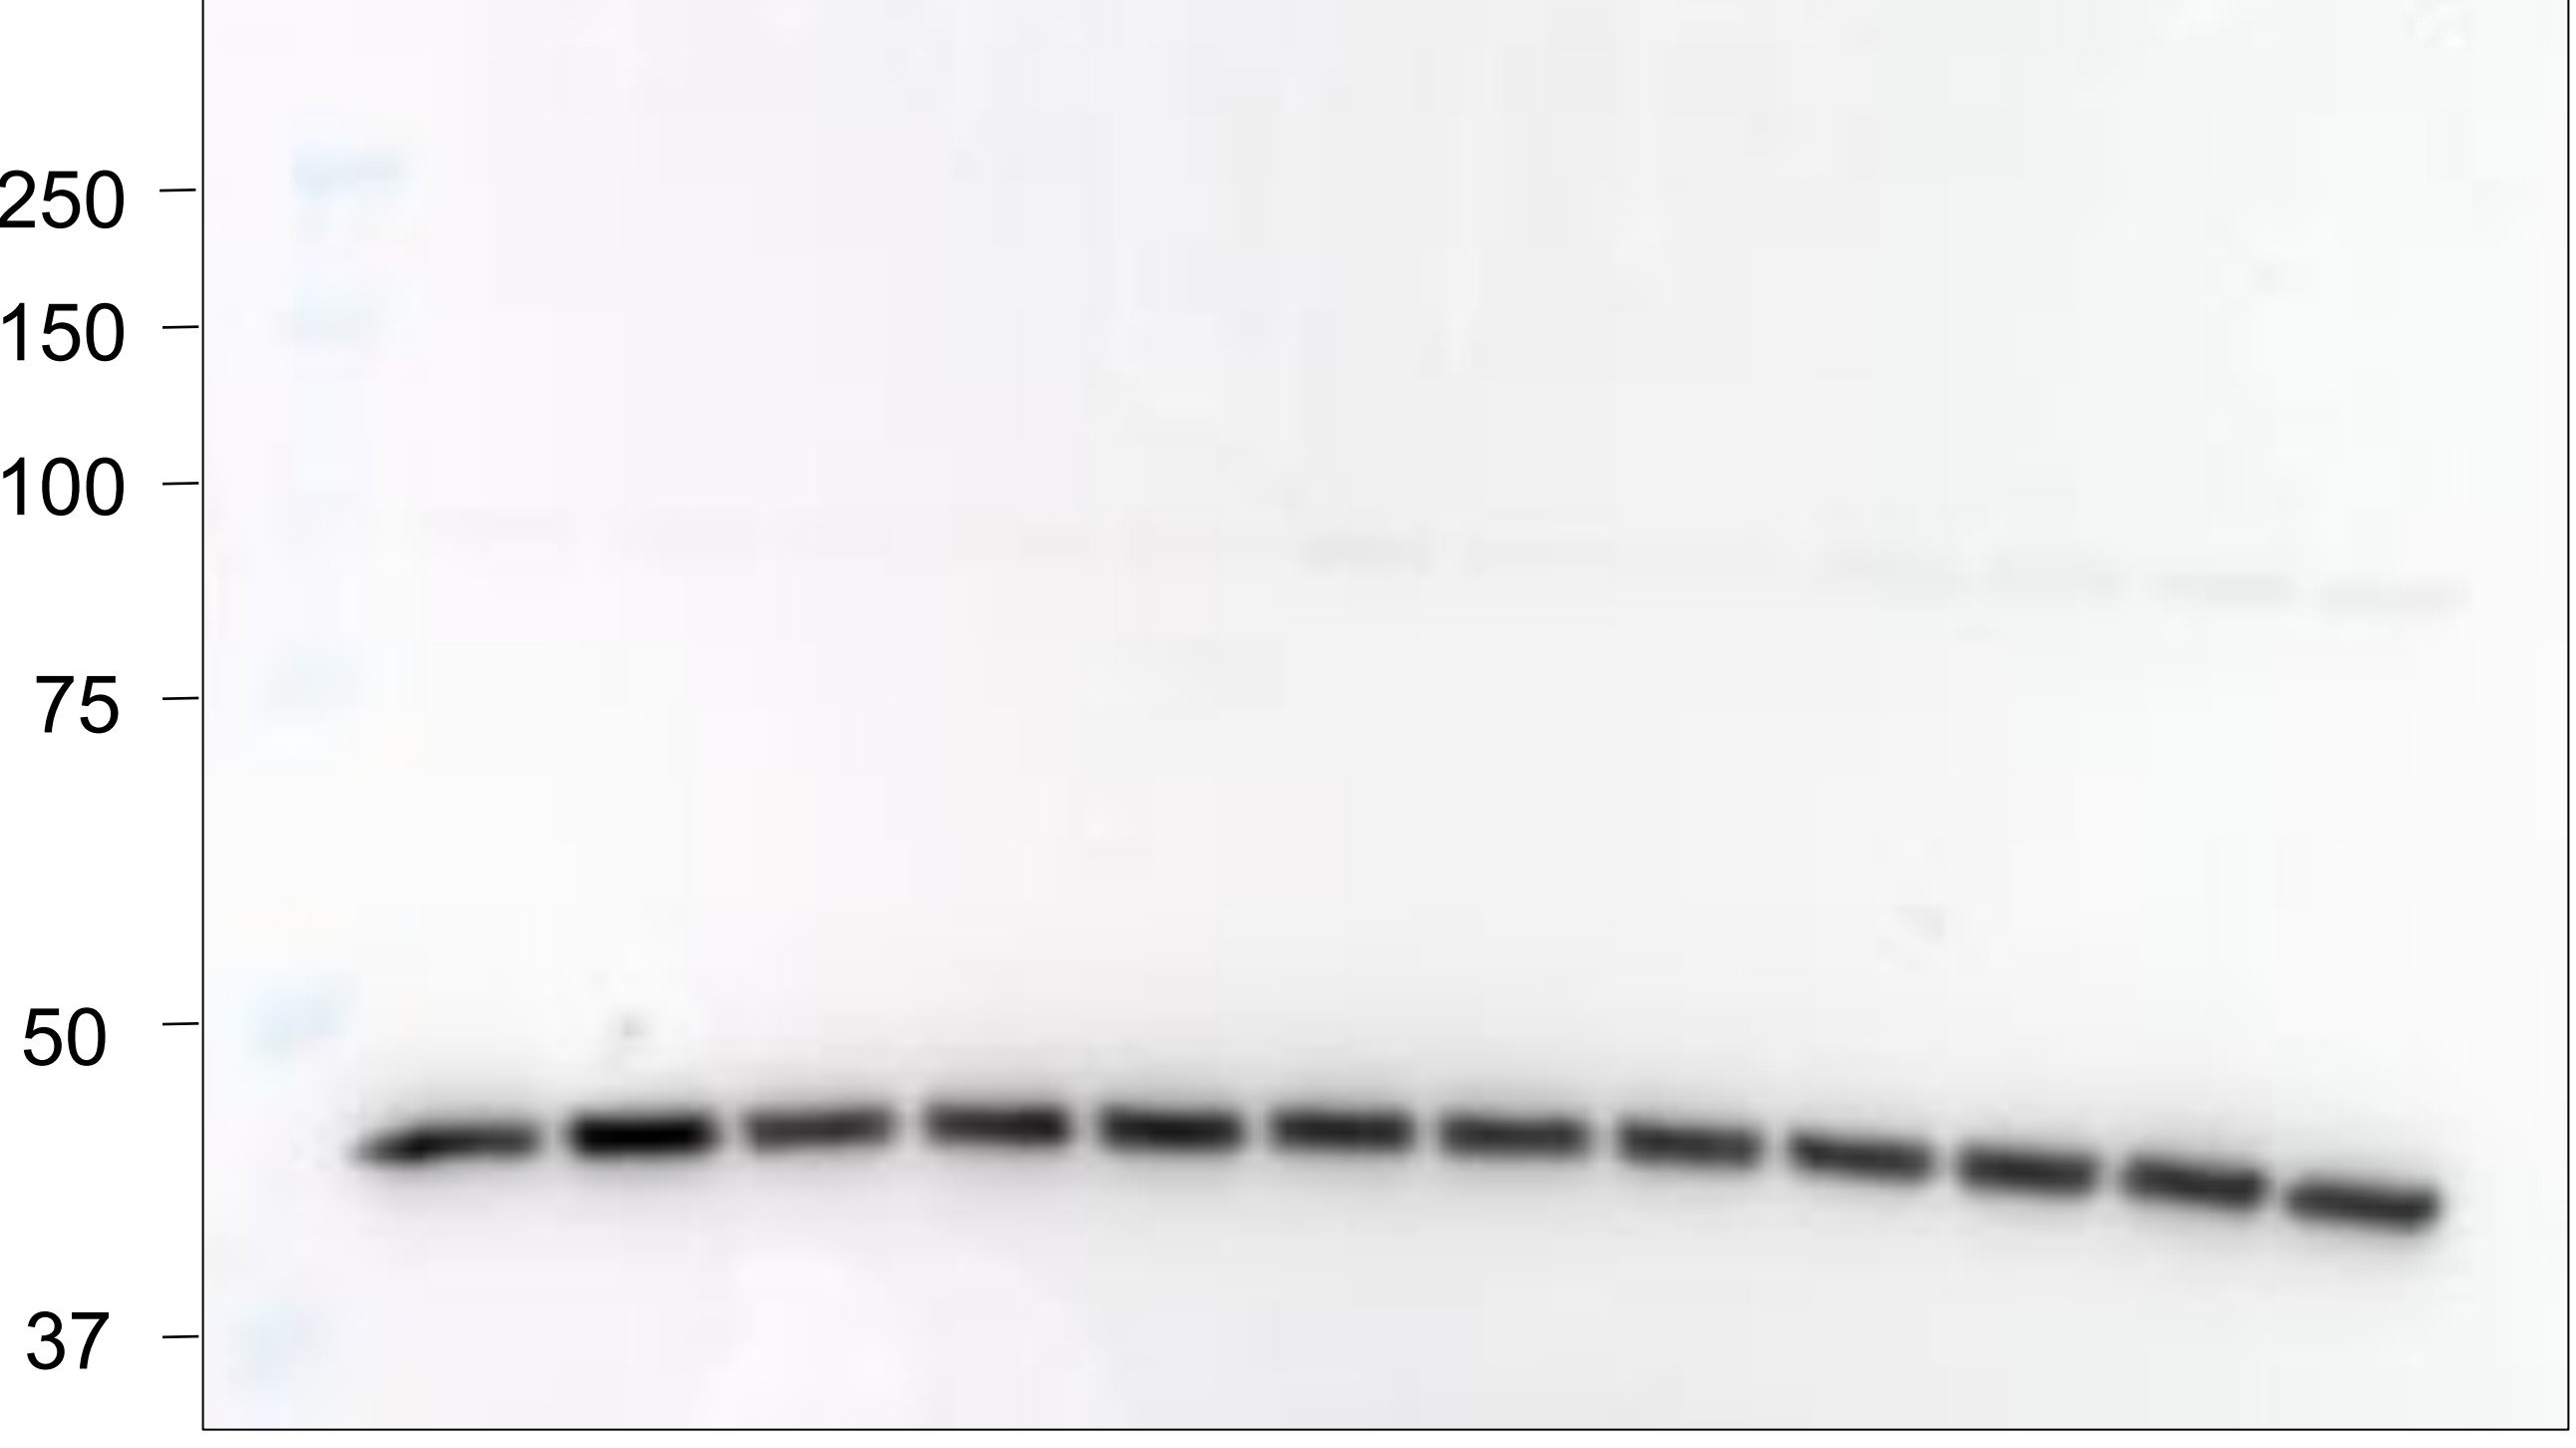

anti-actin

**Representative replicates related to data in Supplemental Figure S2**

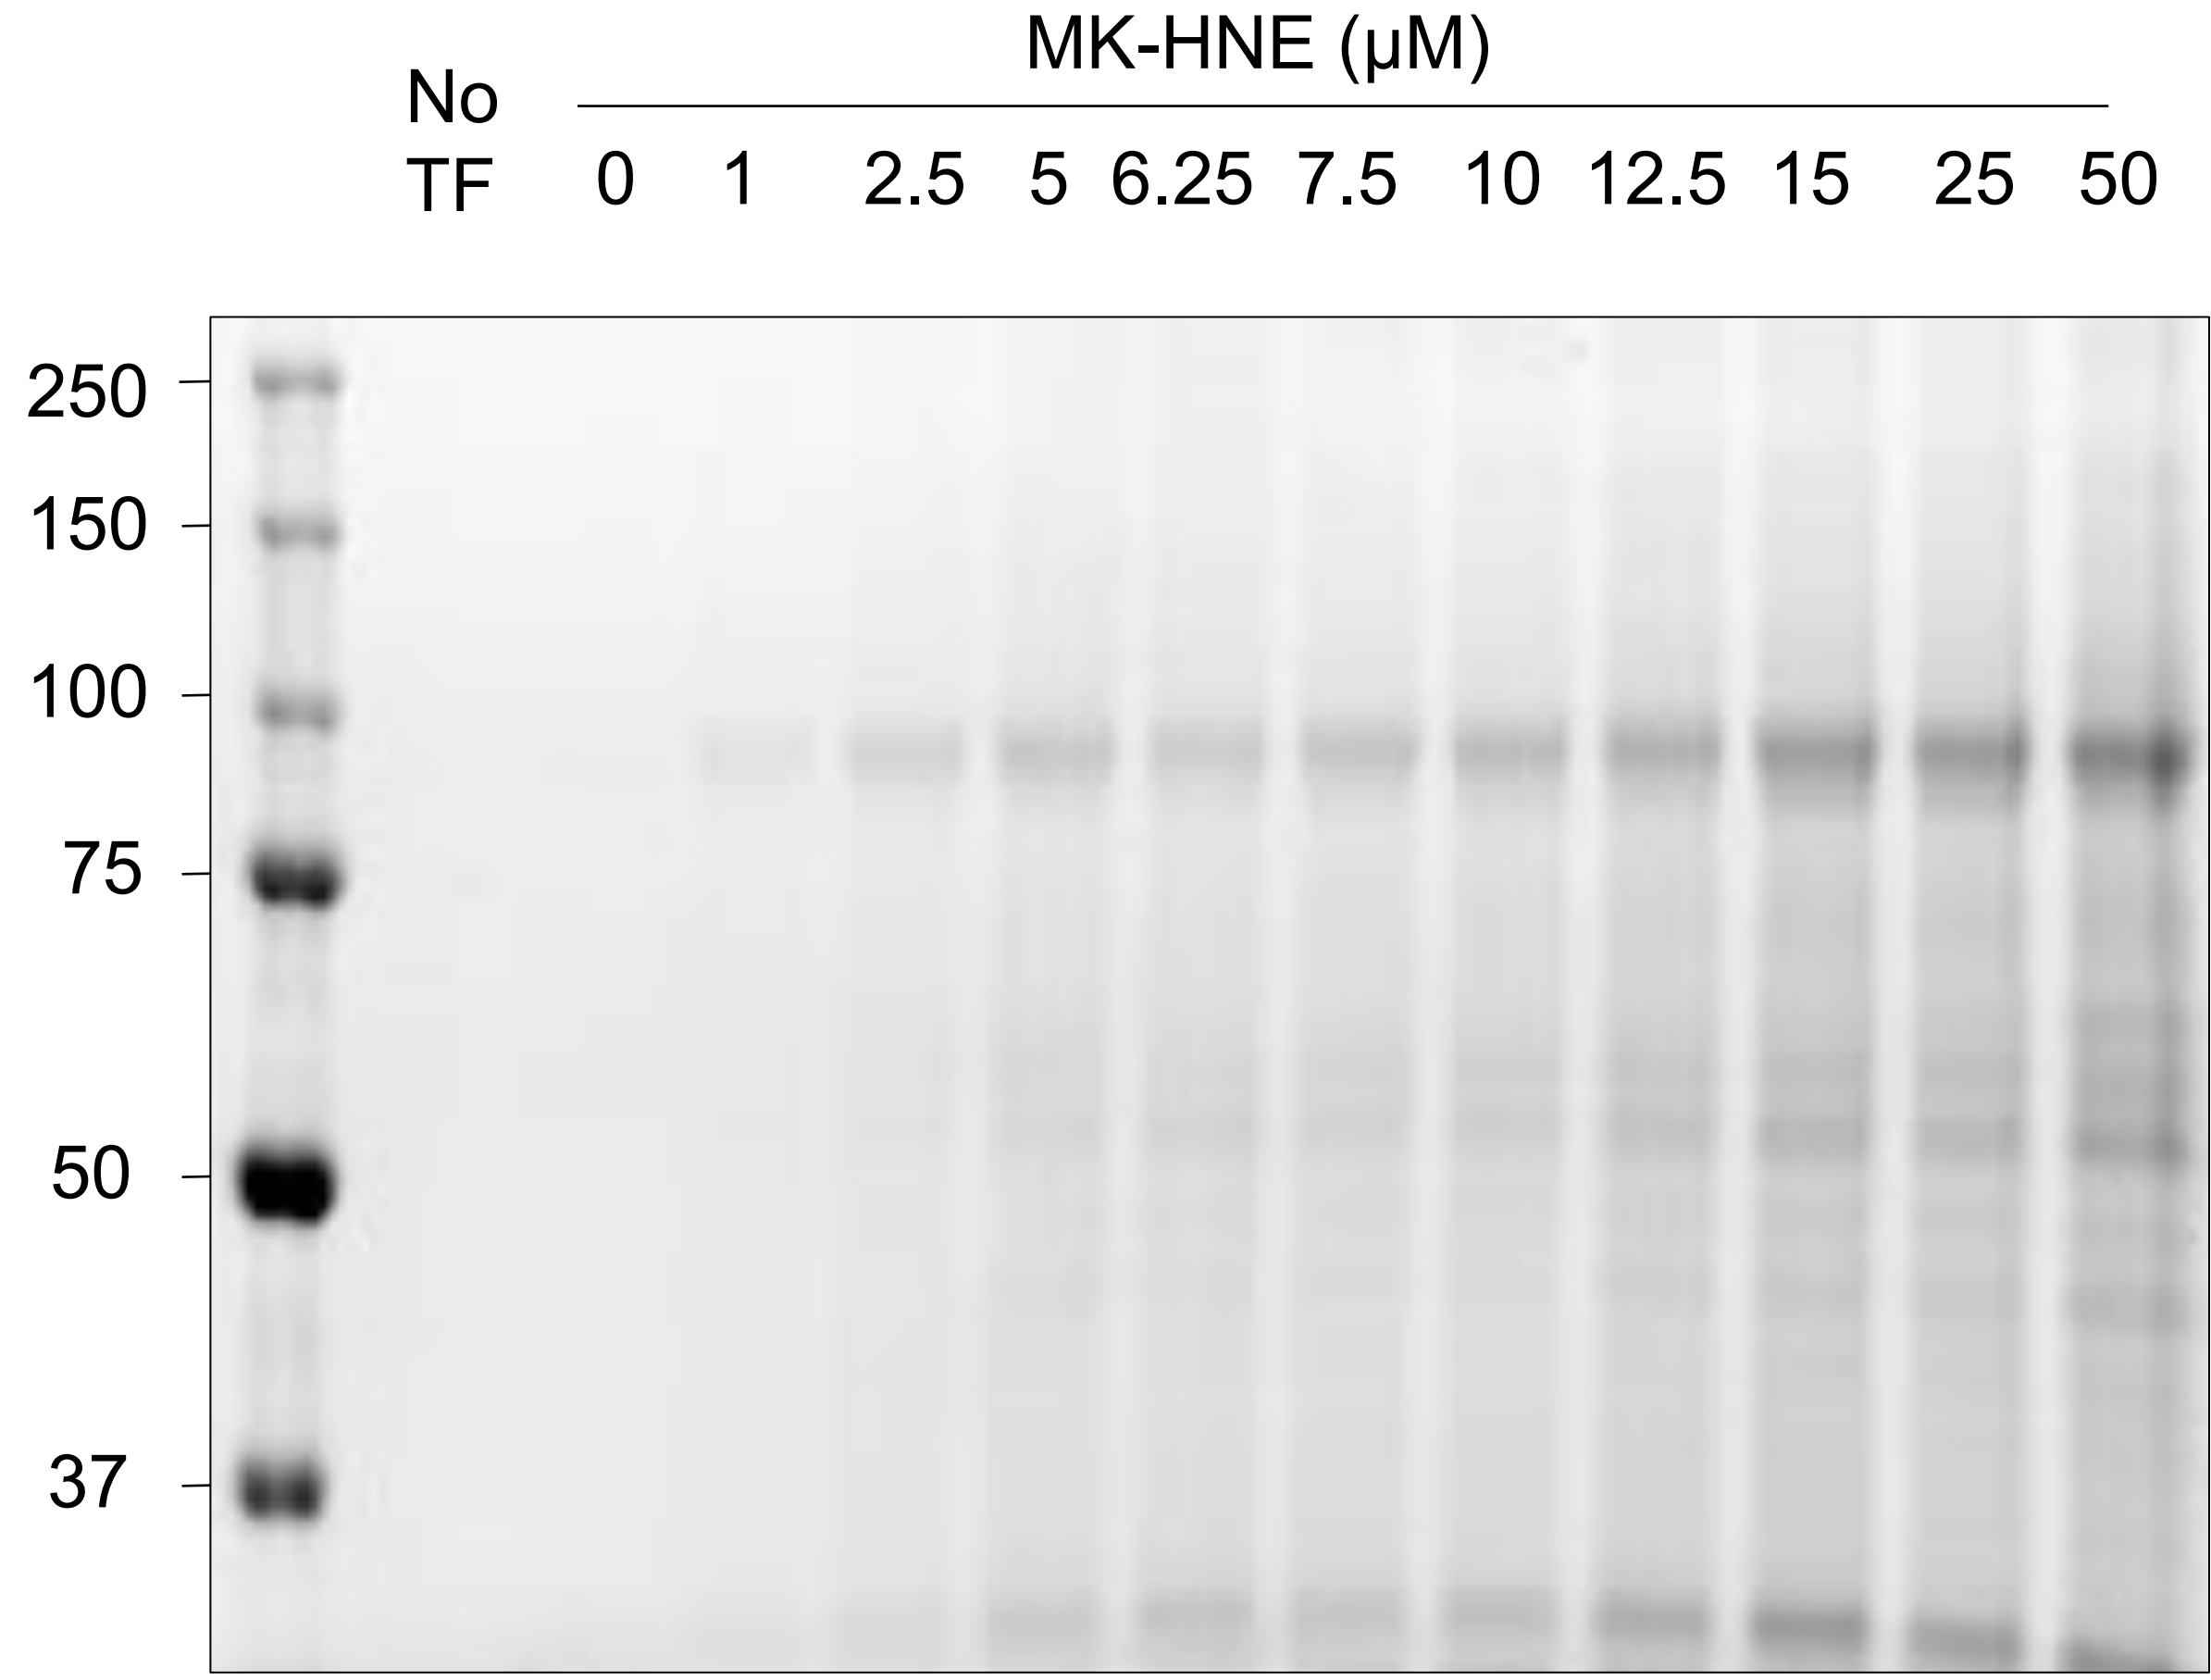

Cy5 (Halo-Akt2)

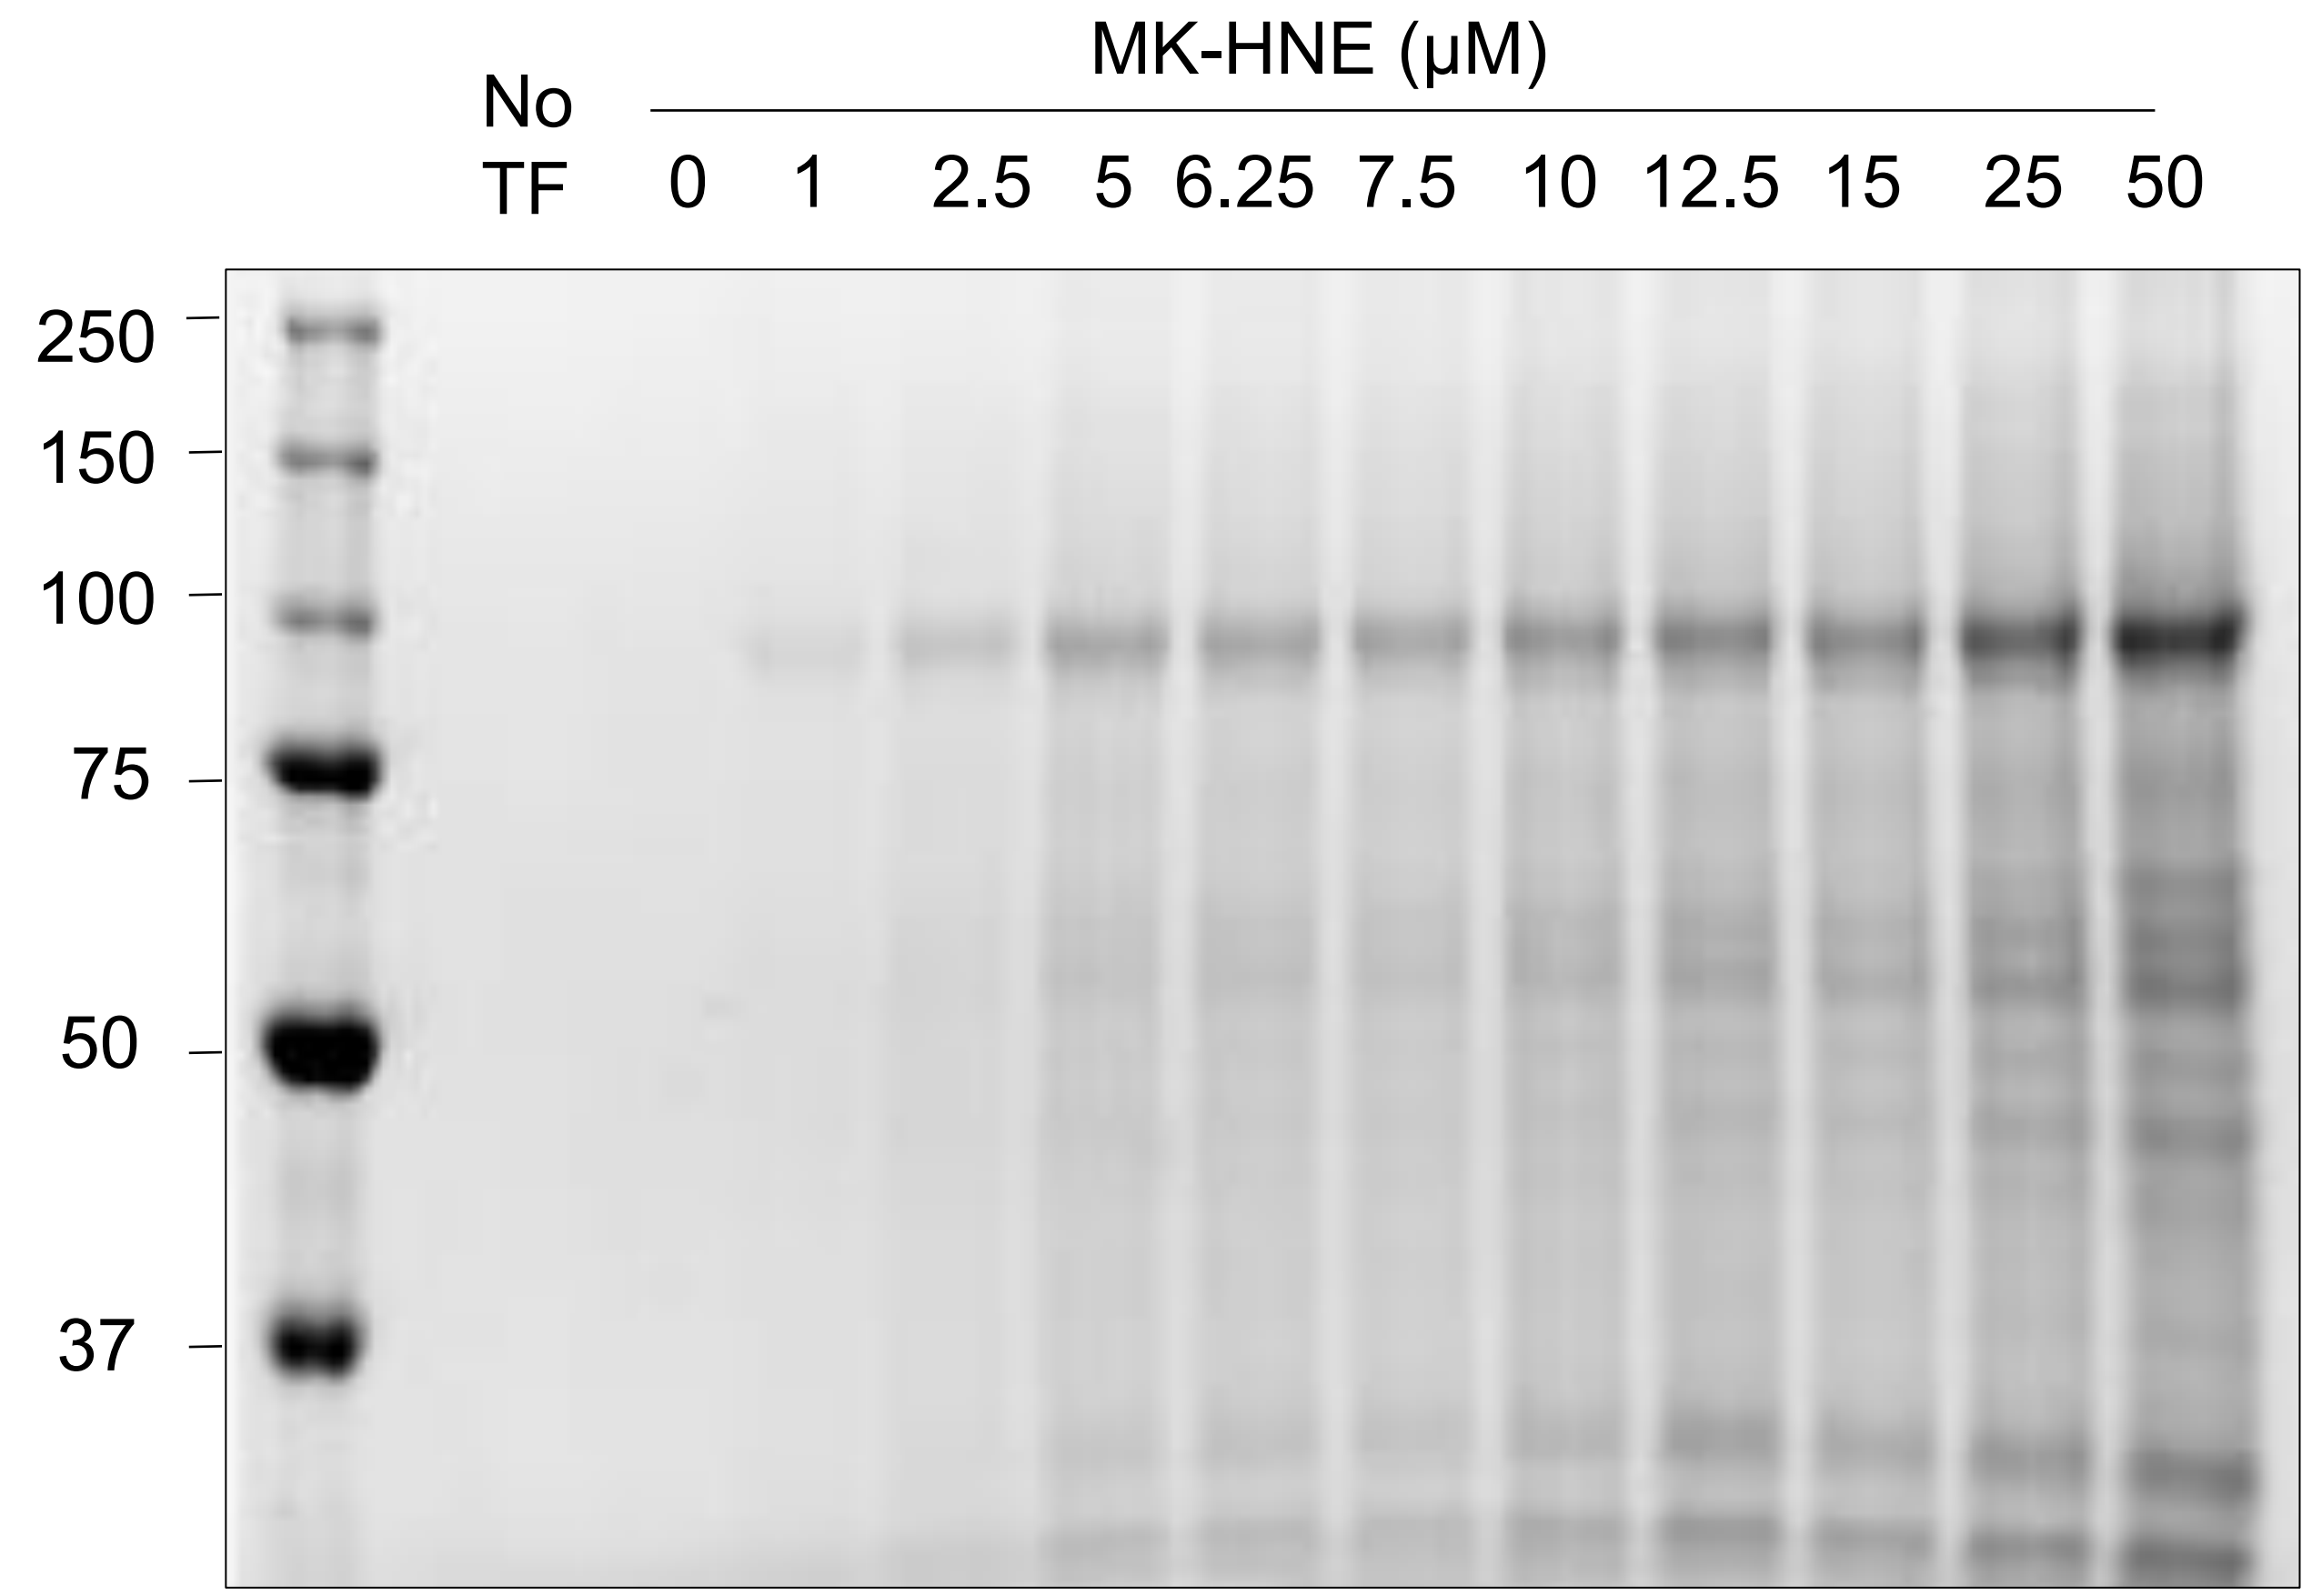

Cy5 (Halo-Akt2)

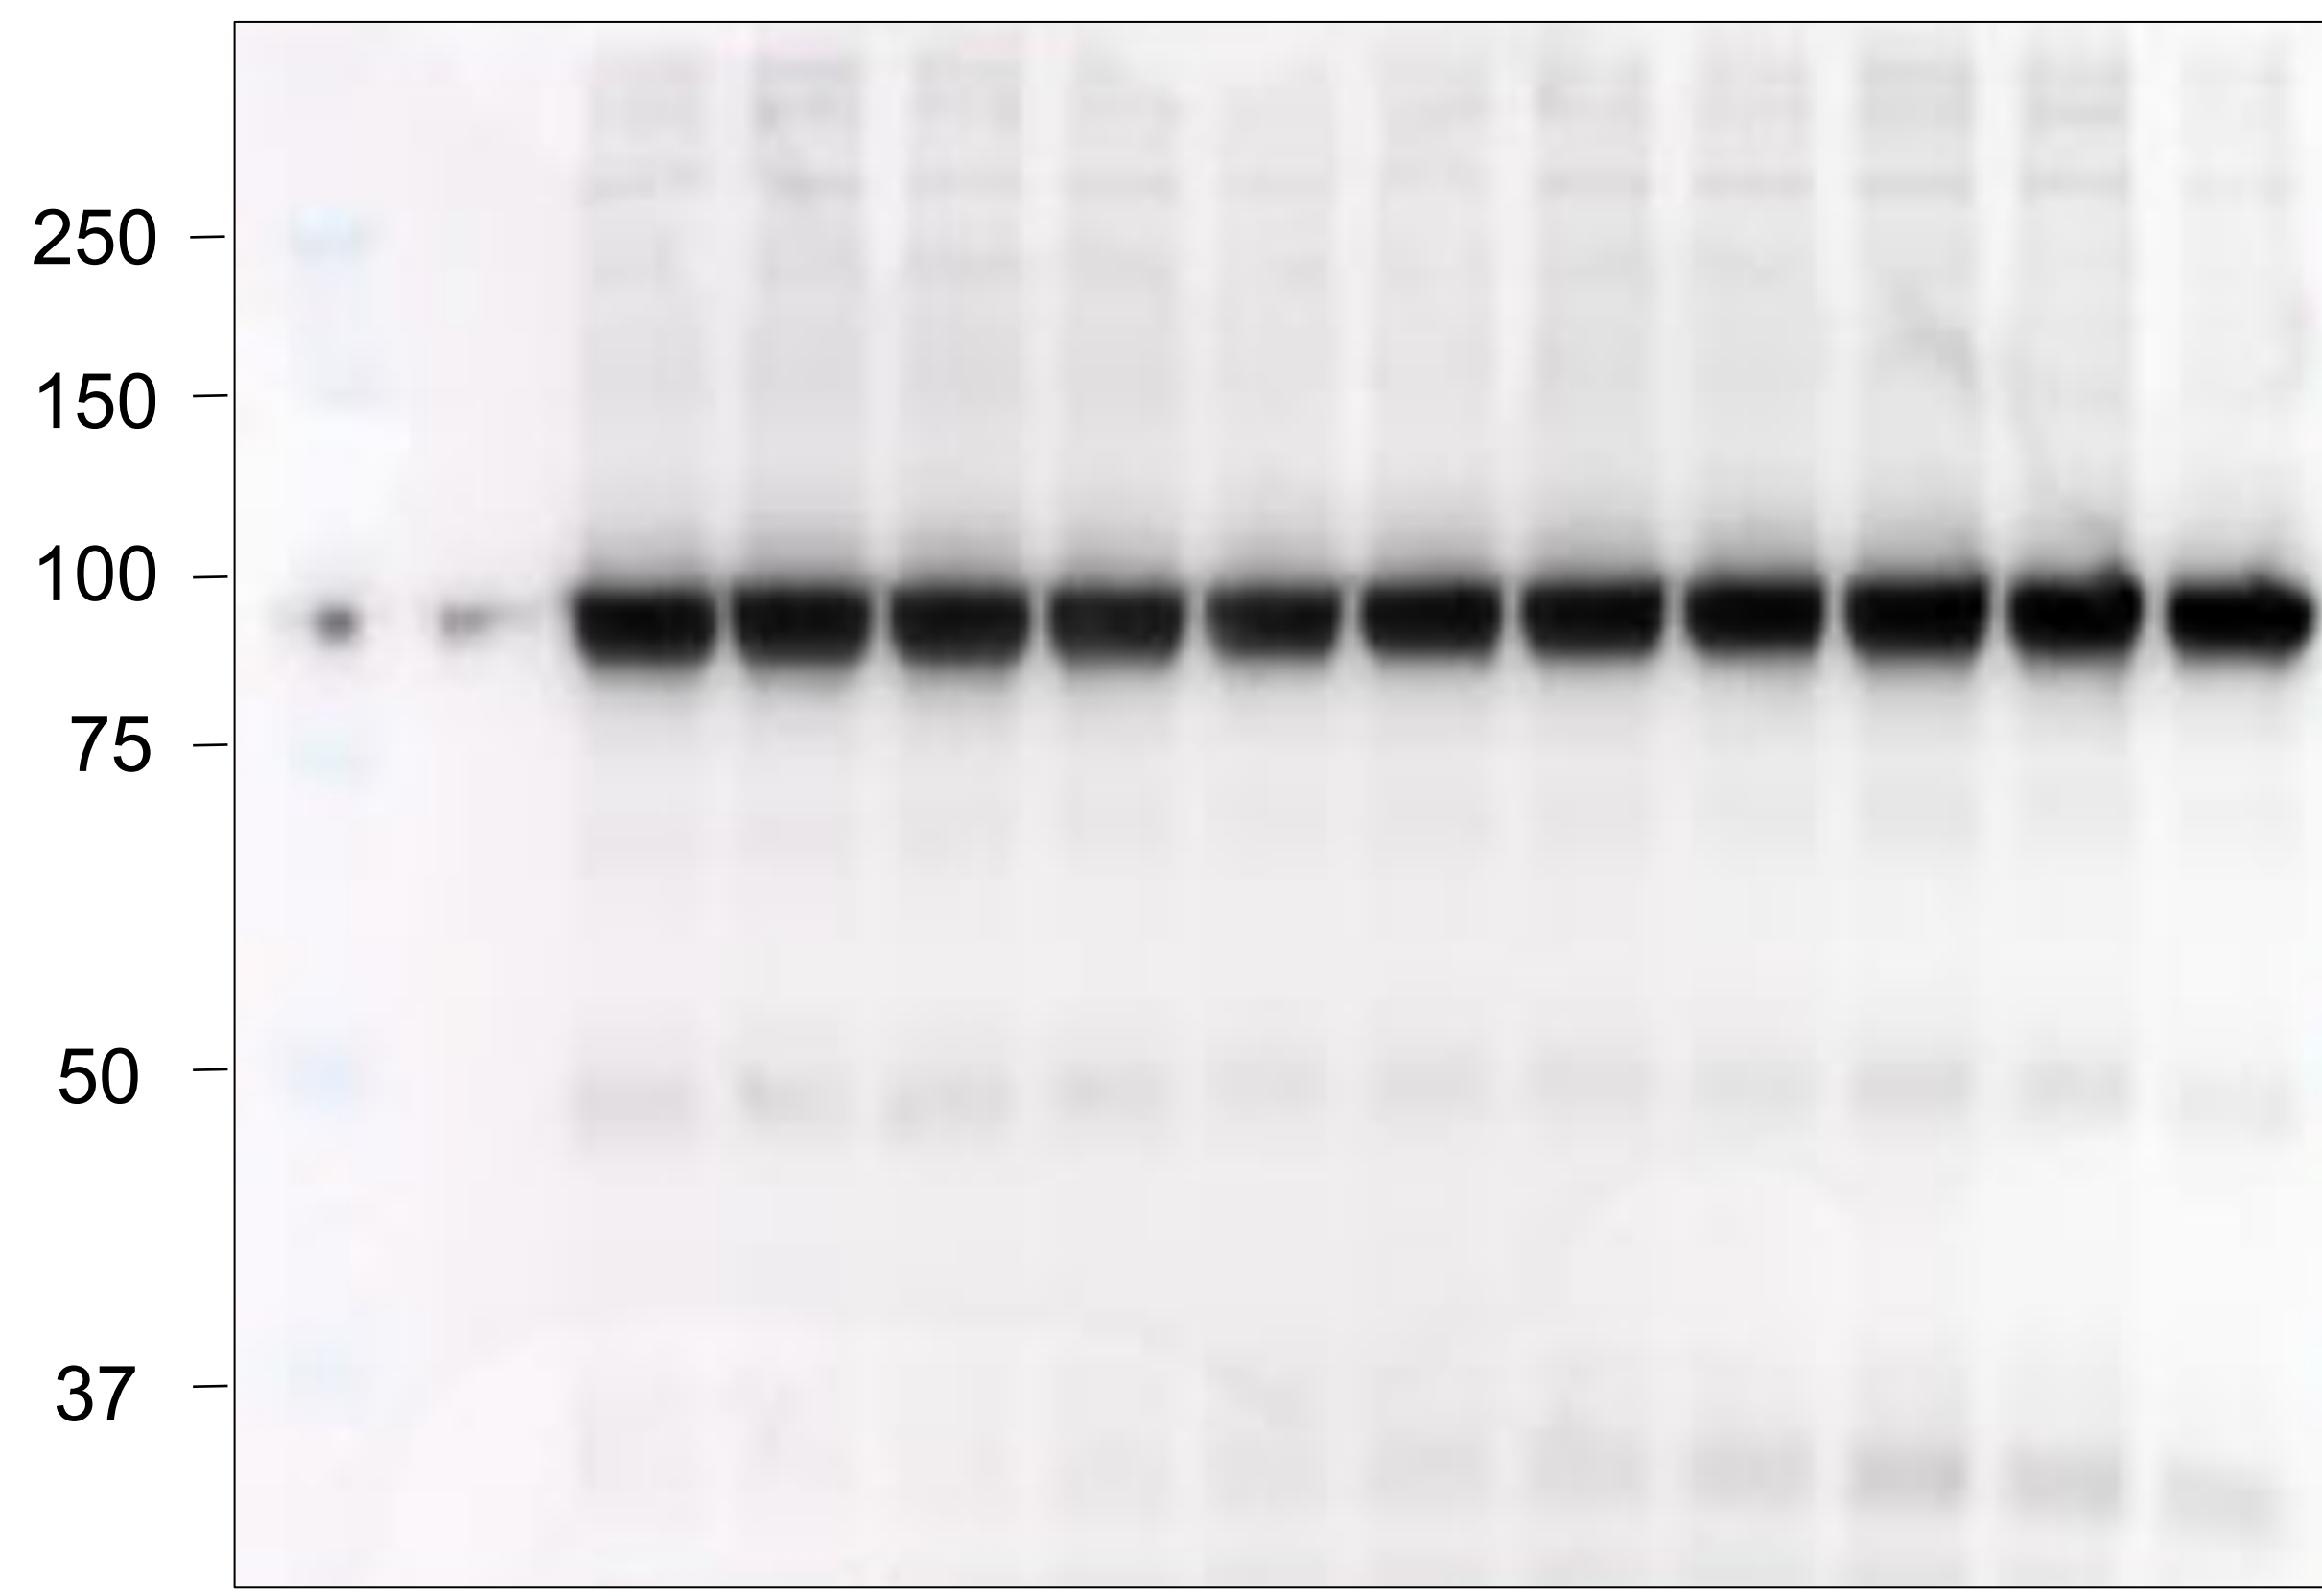

anti-Halo

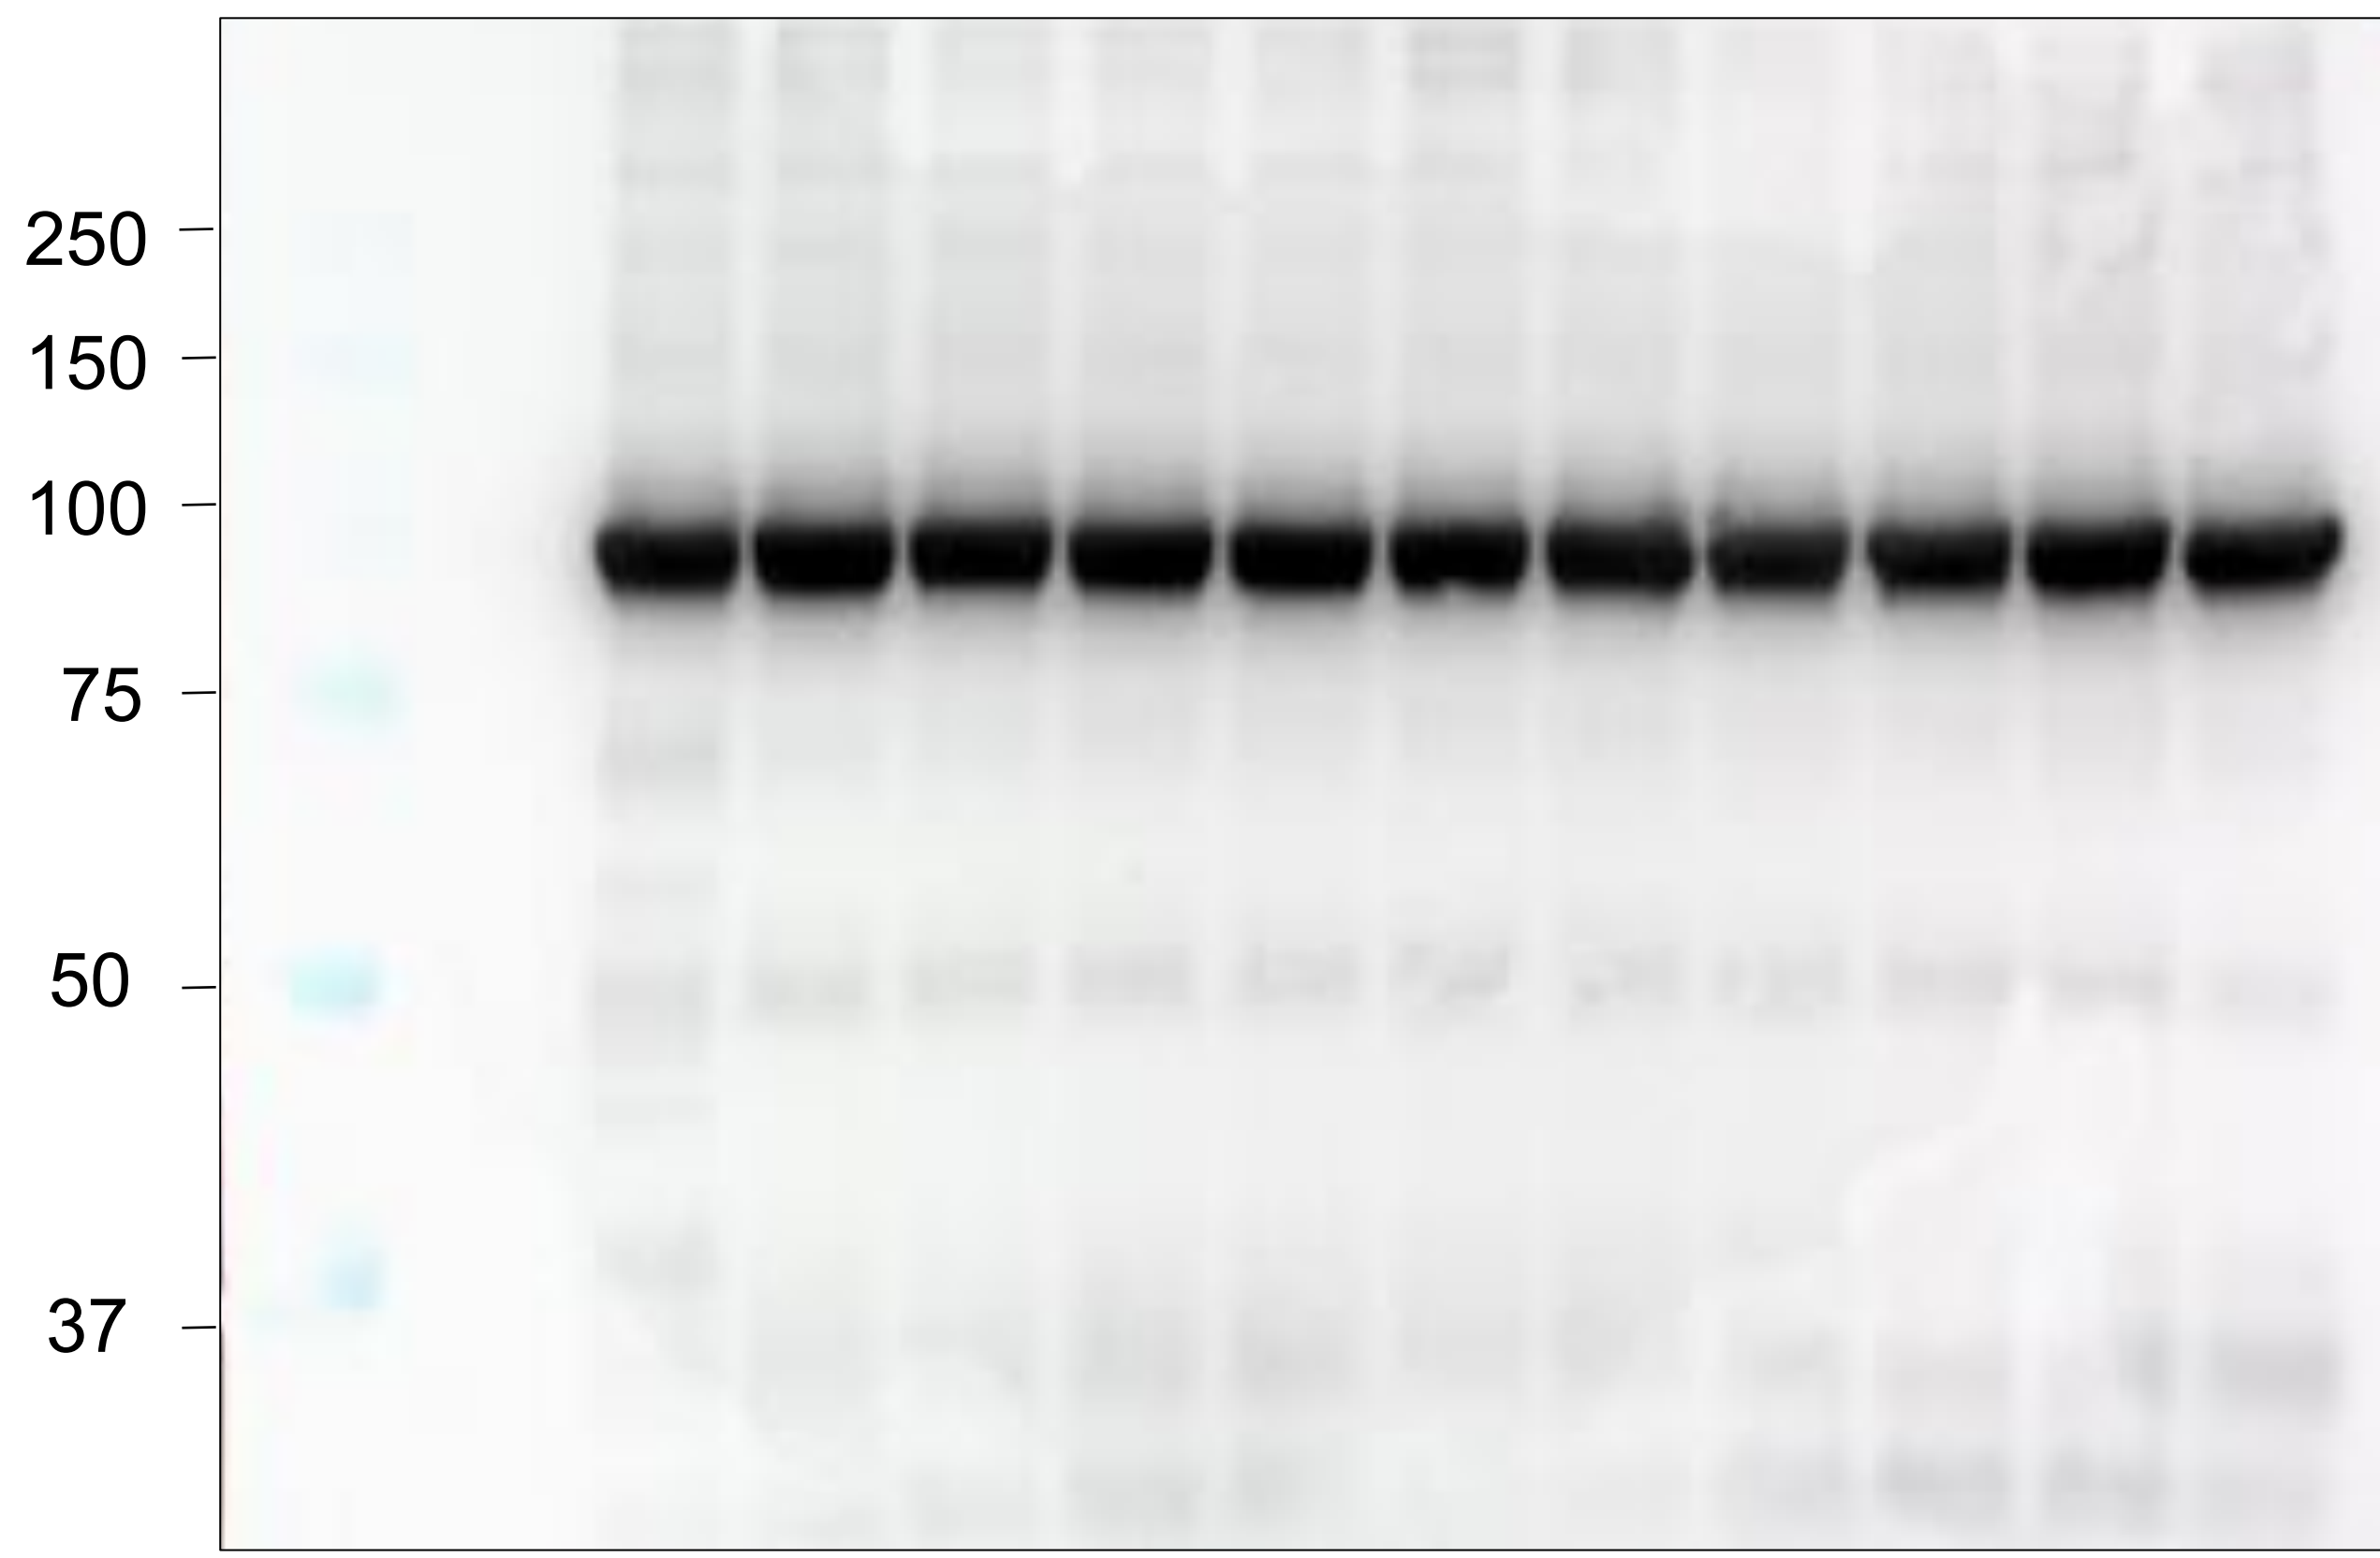

anti-Halo

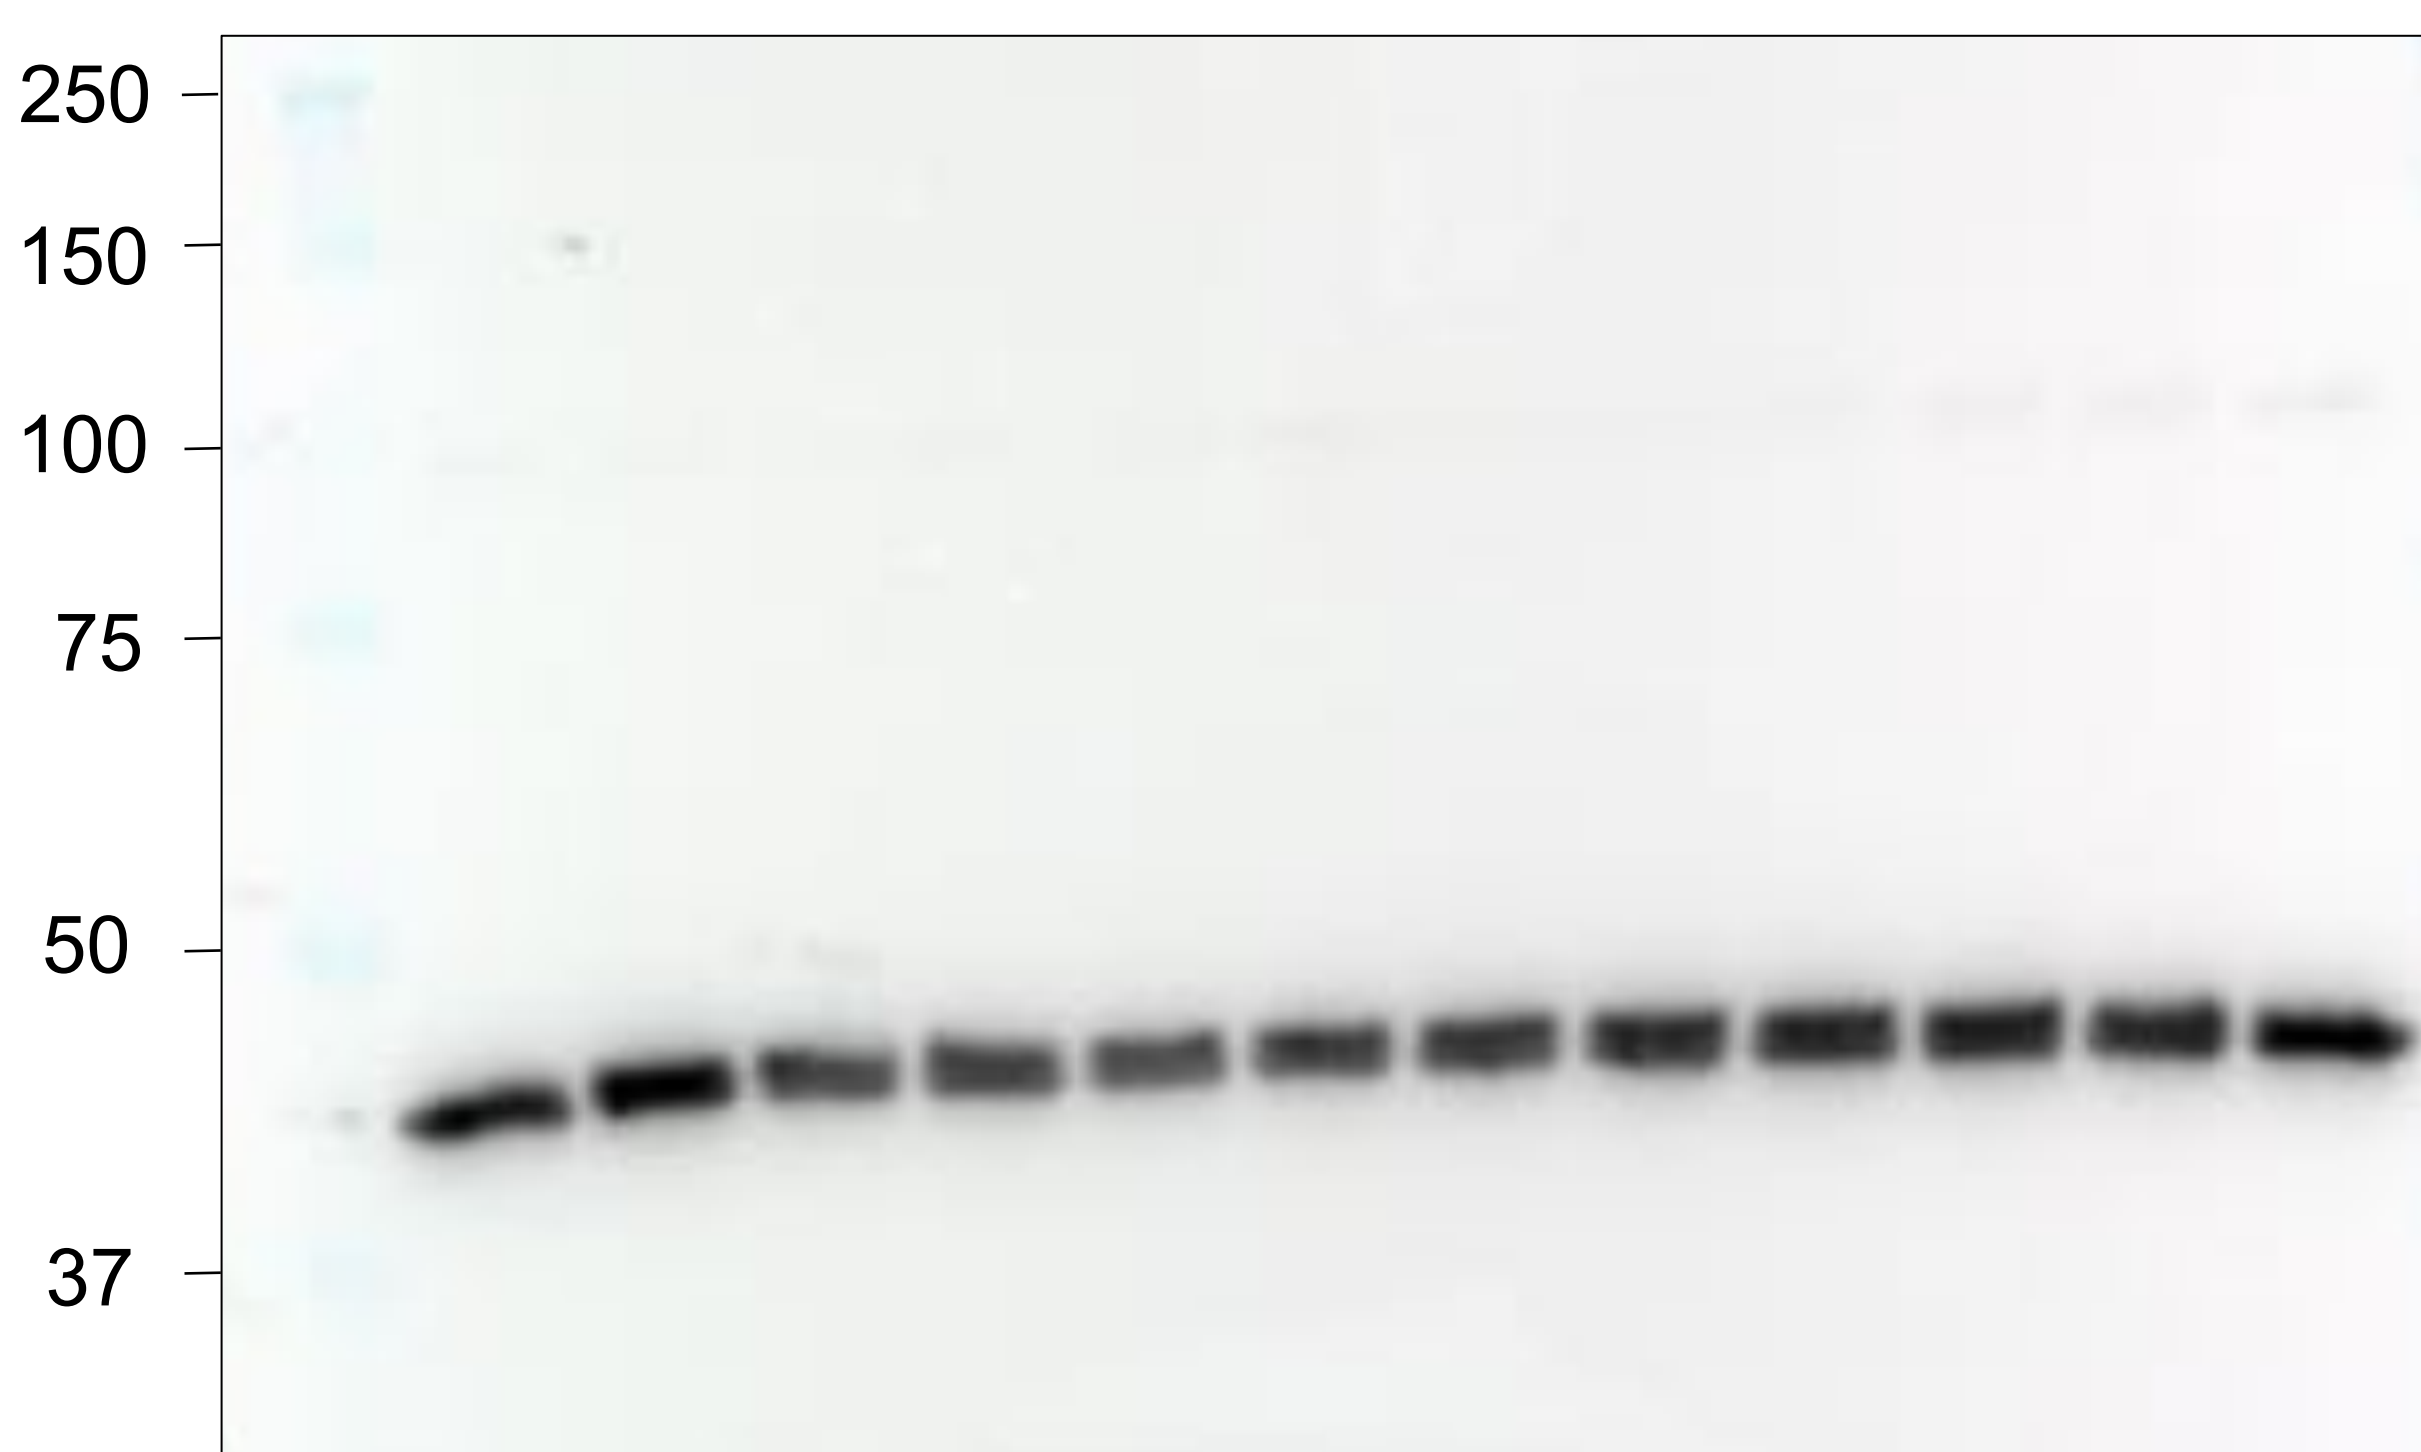

anti-actin

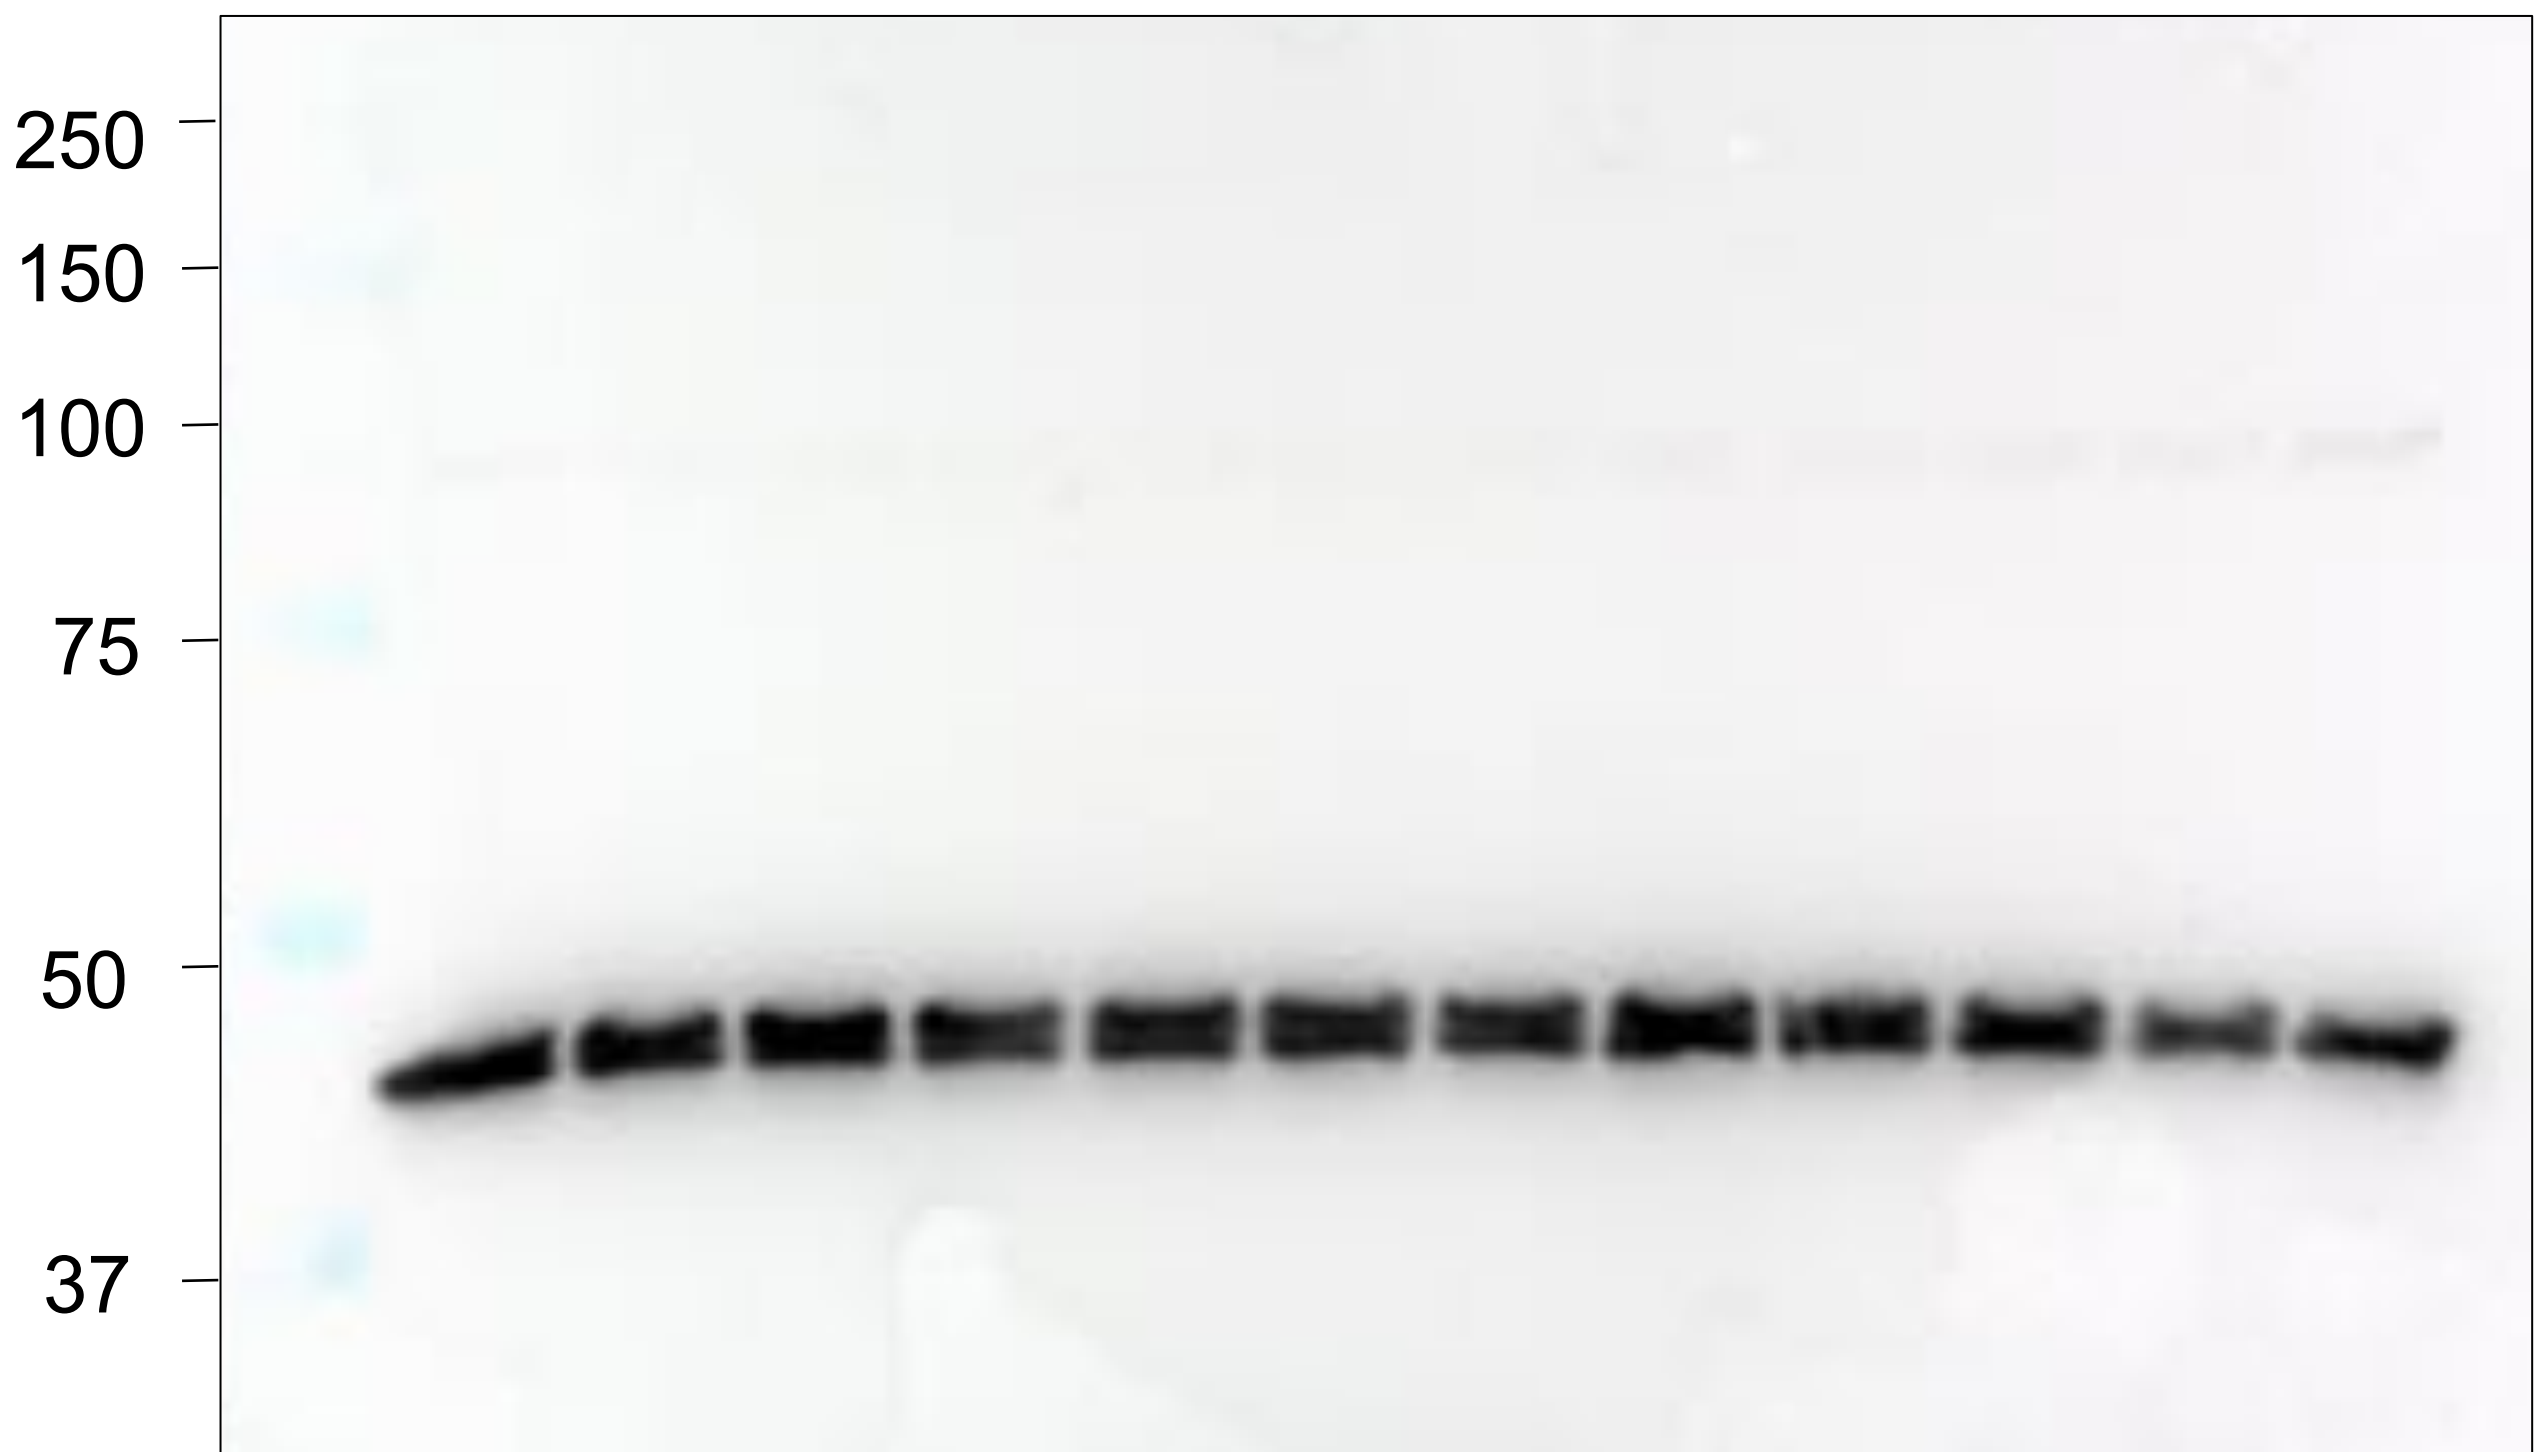

anti-actin

**Representative replicates related to data in Supplemental Figure S3**

Endogenous Akt pull-down using MK-HNE (5  $\mu$ M)

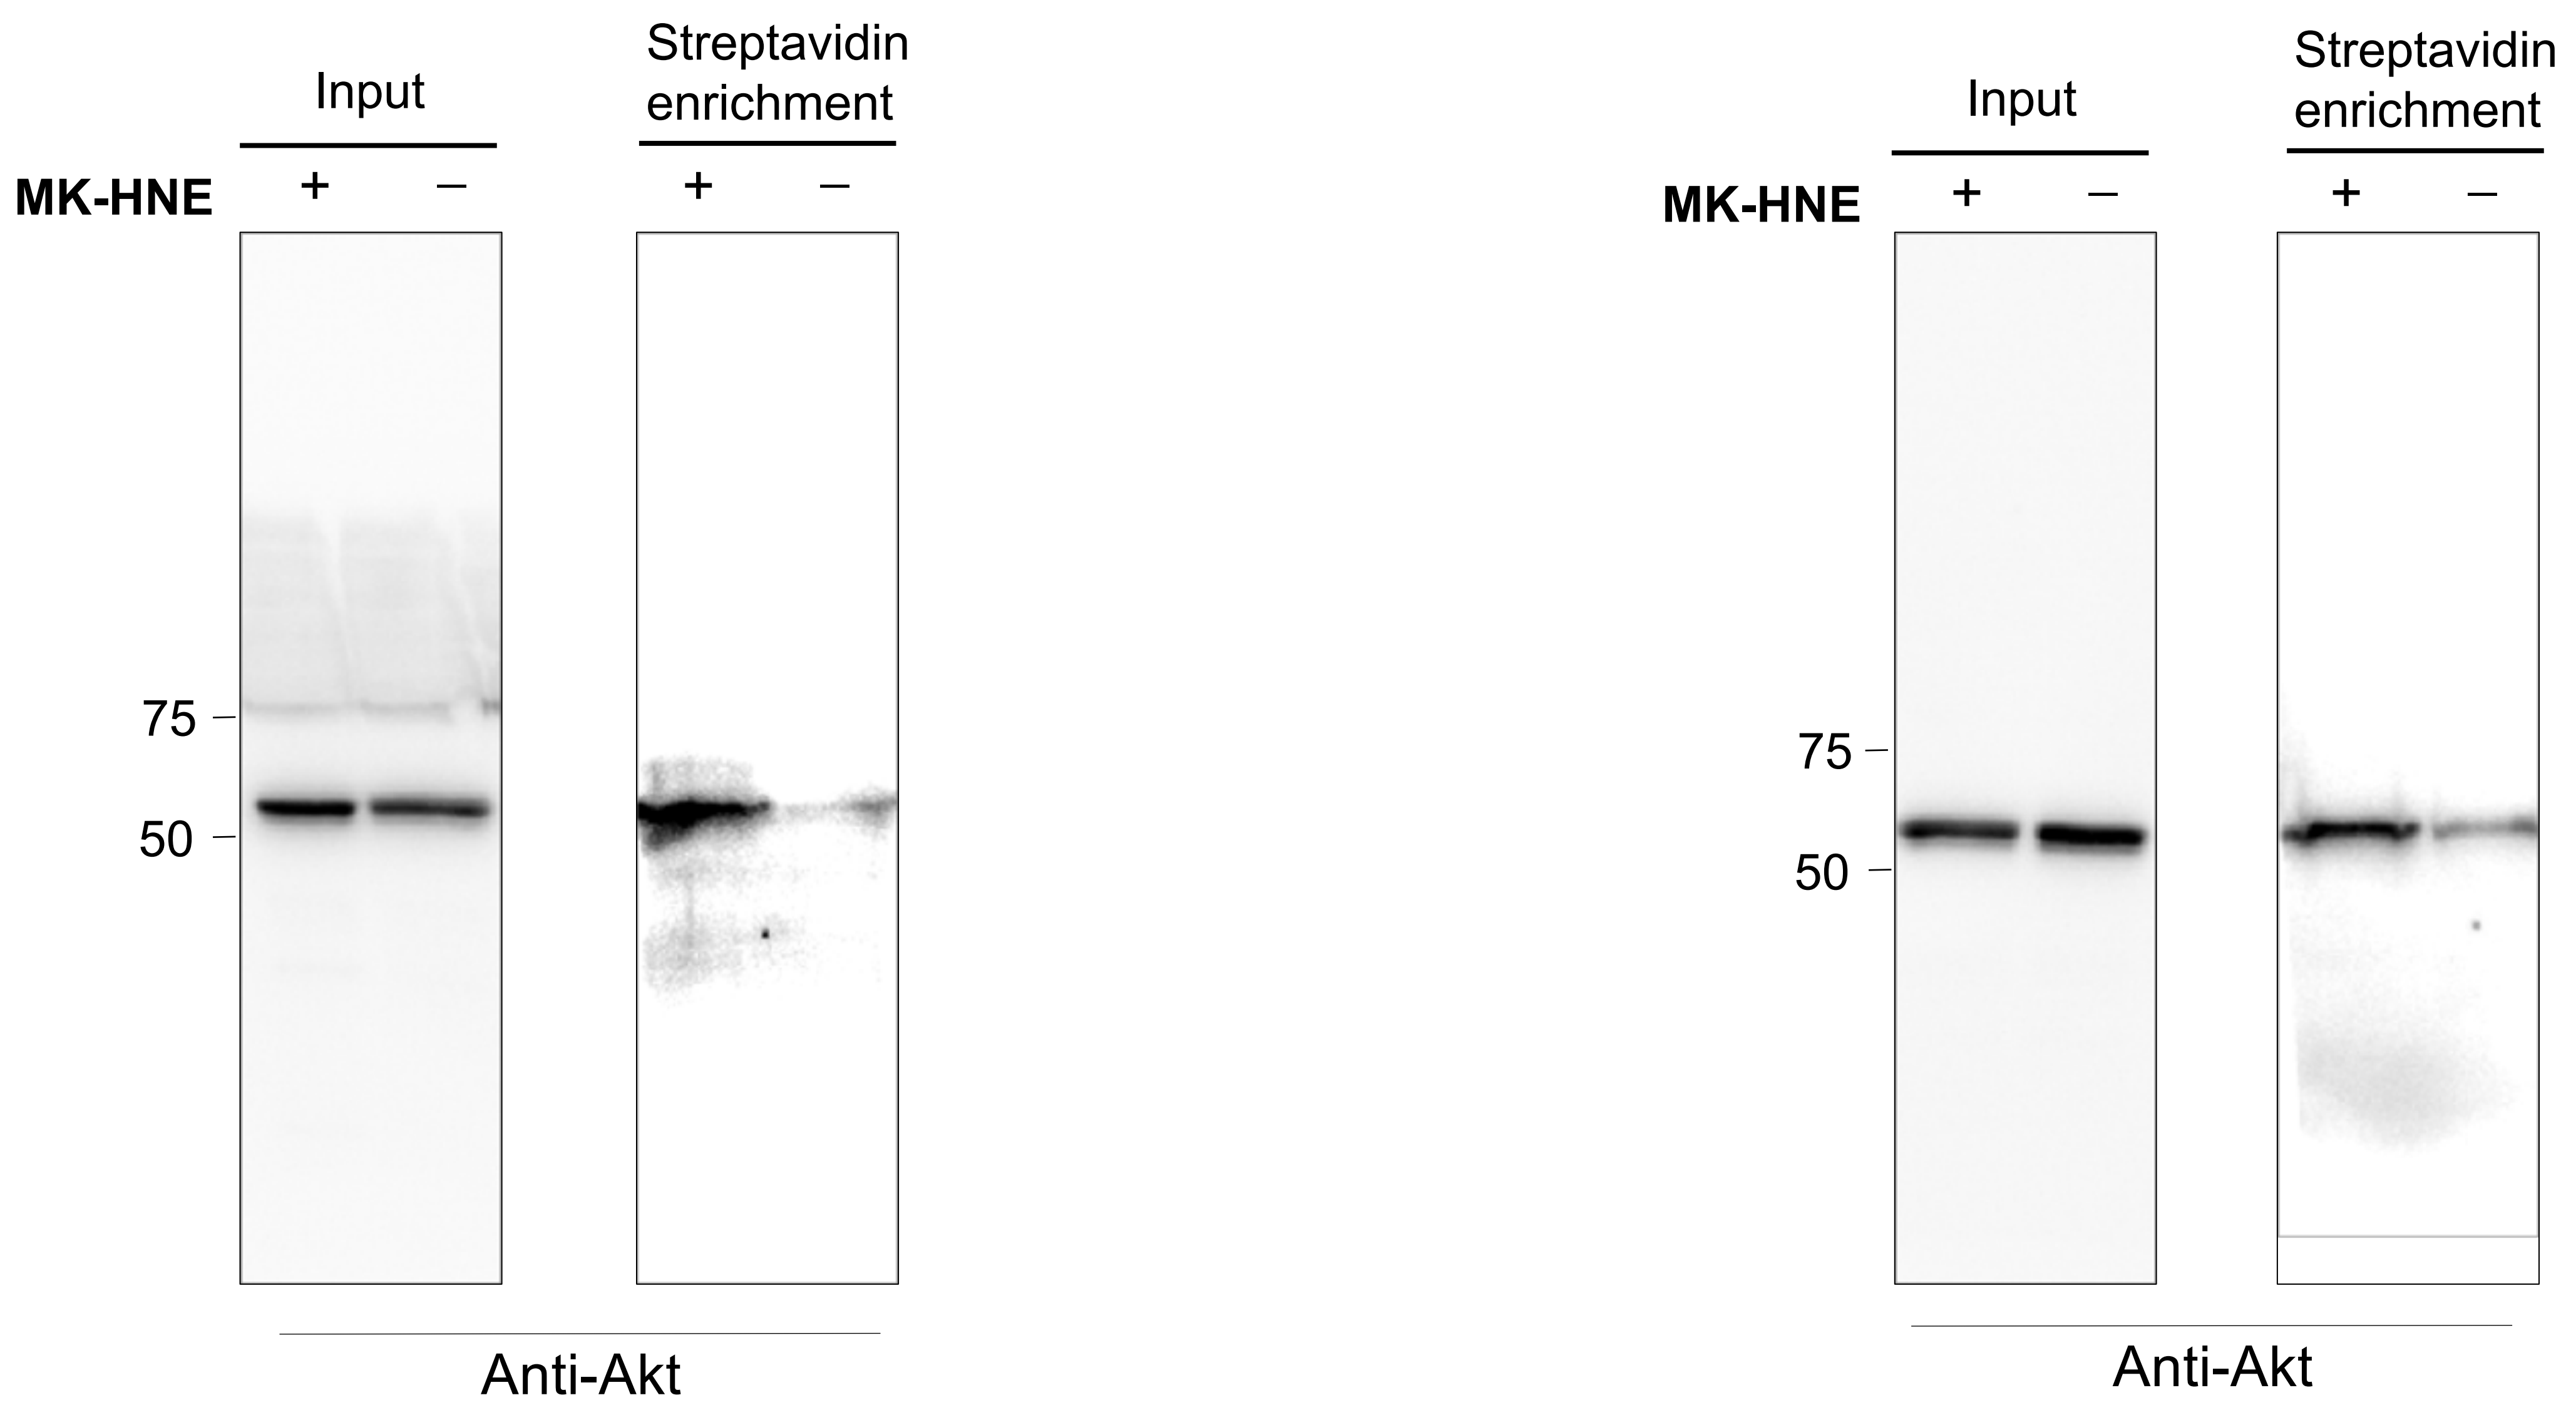

**Representative replicates related to data in Supplemental Figure S5**

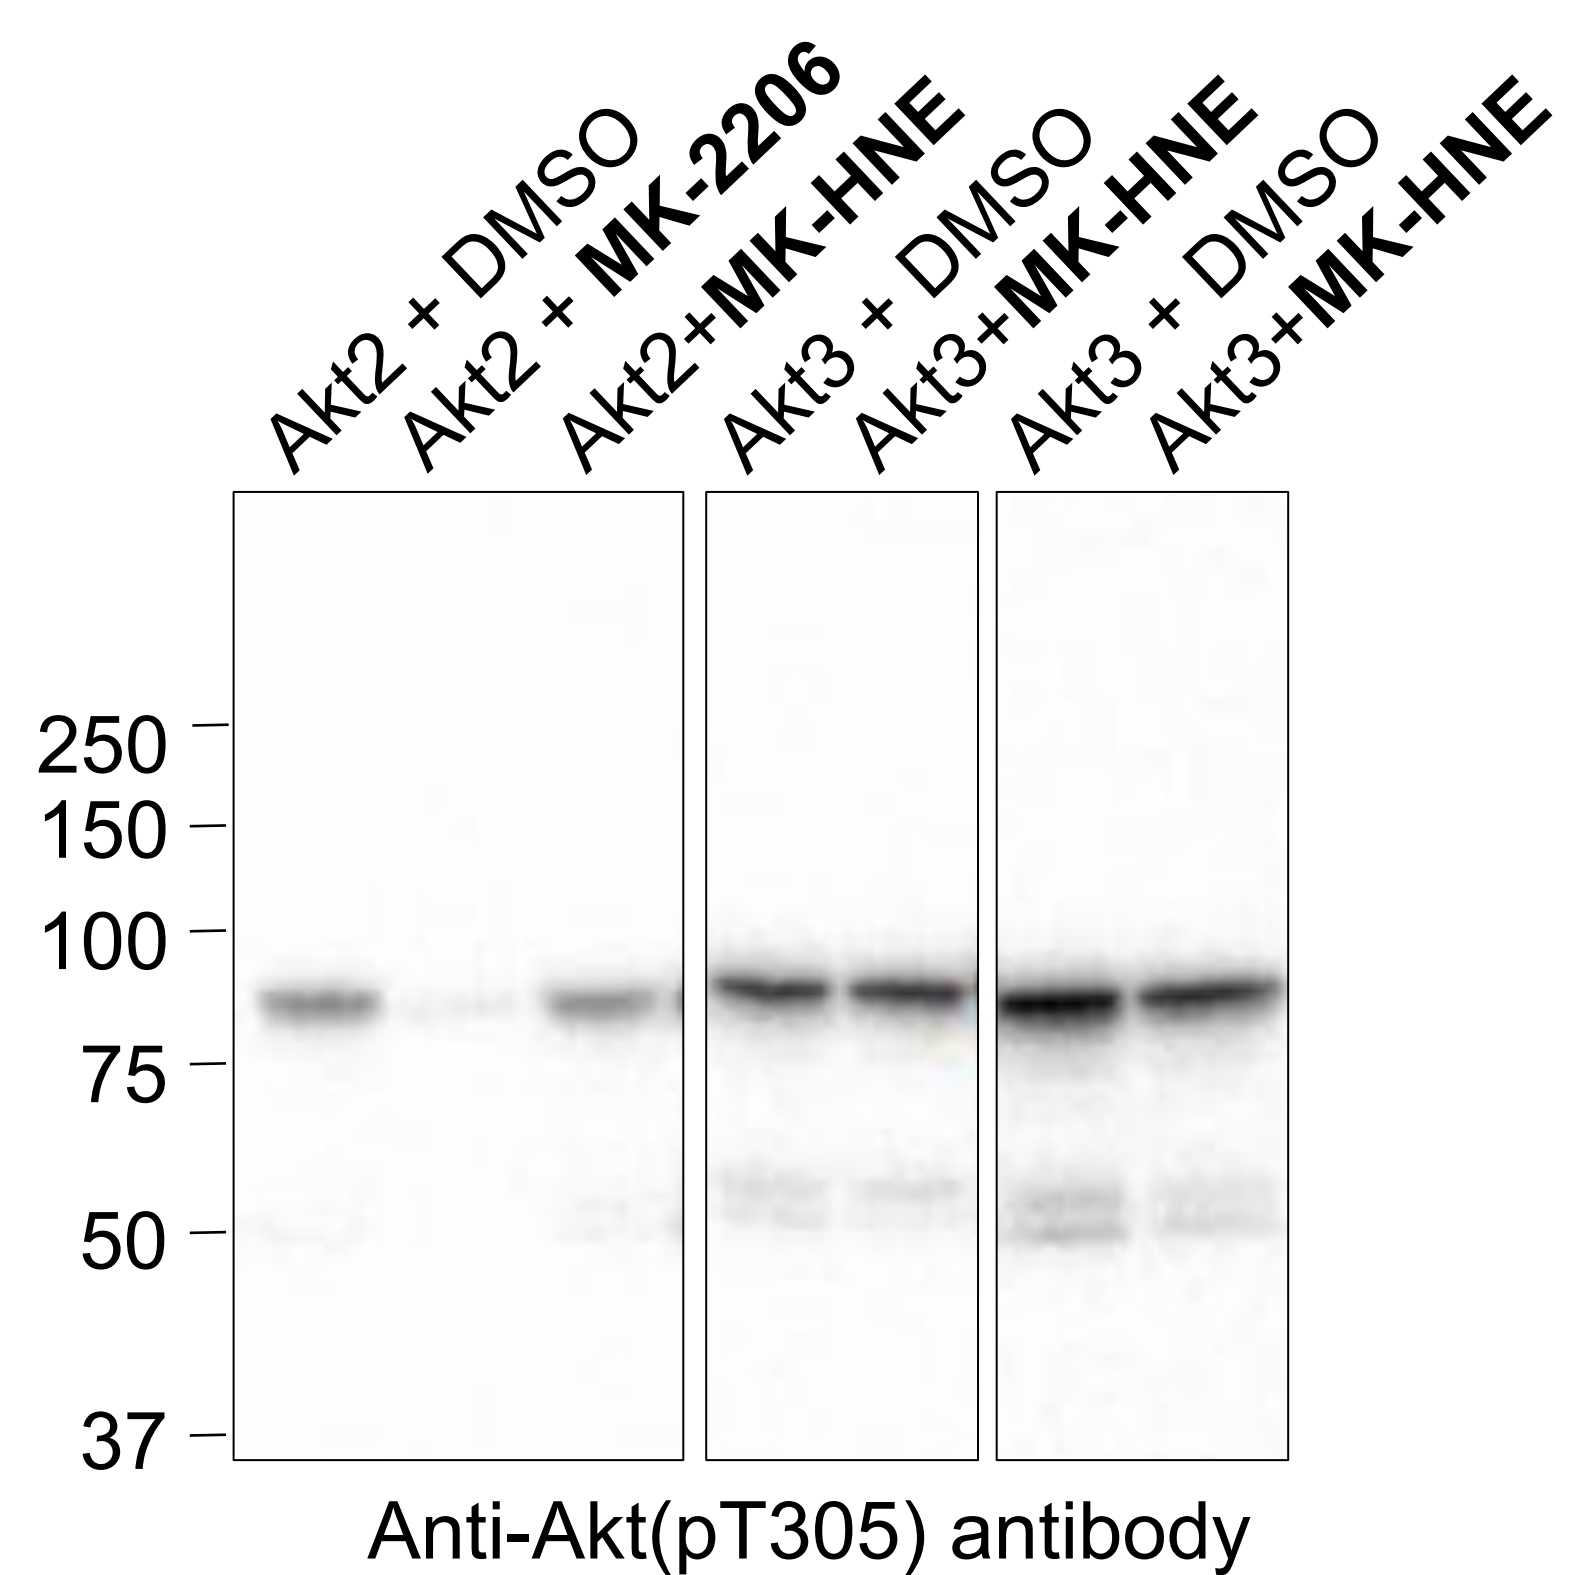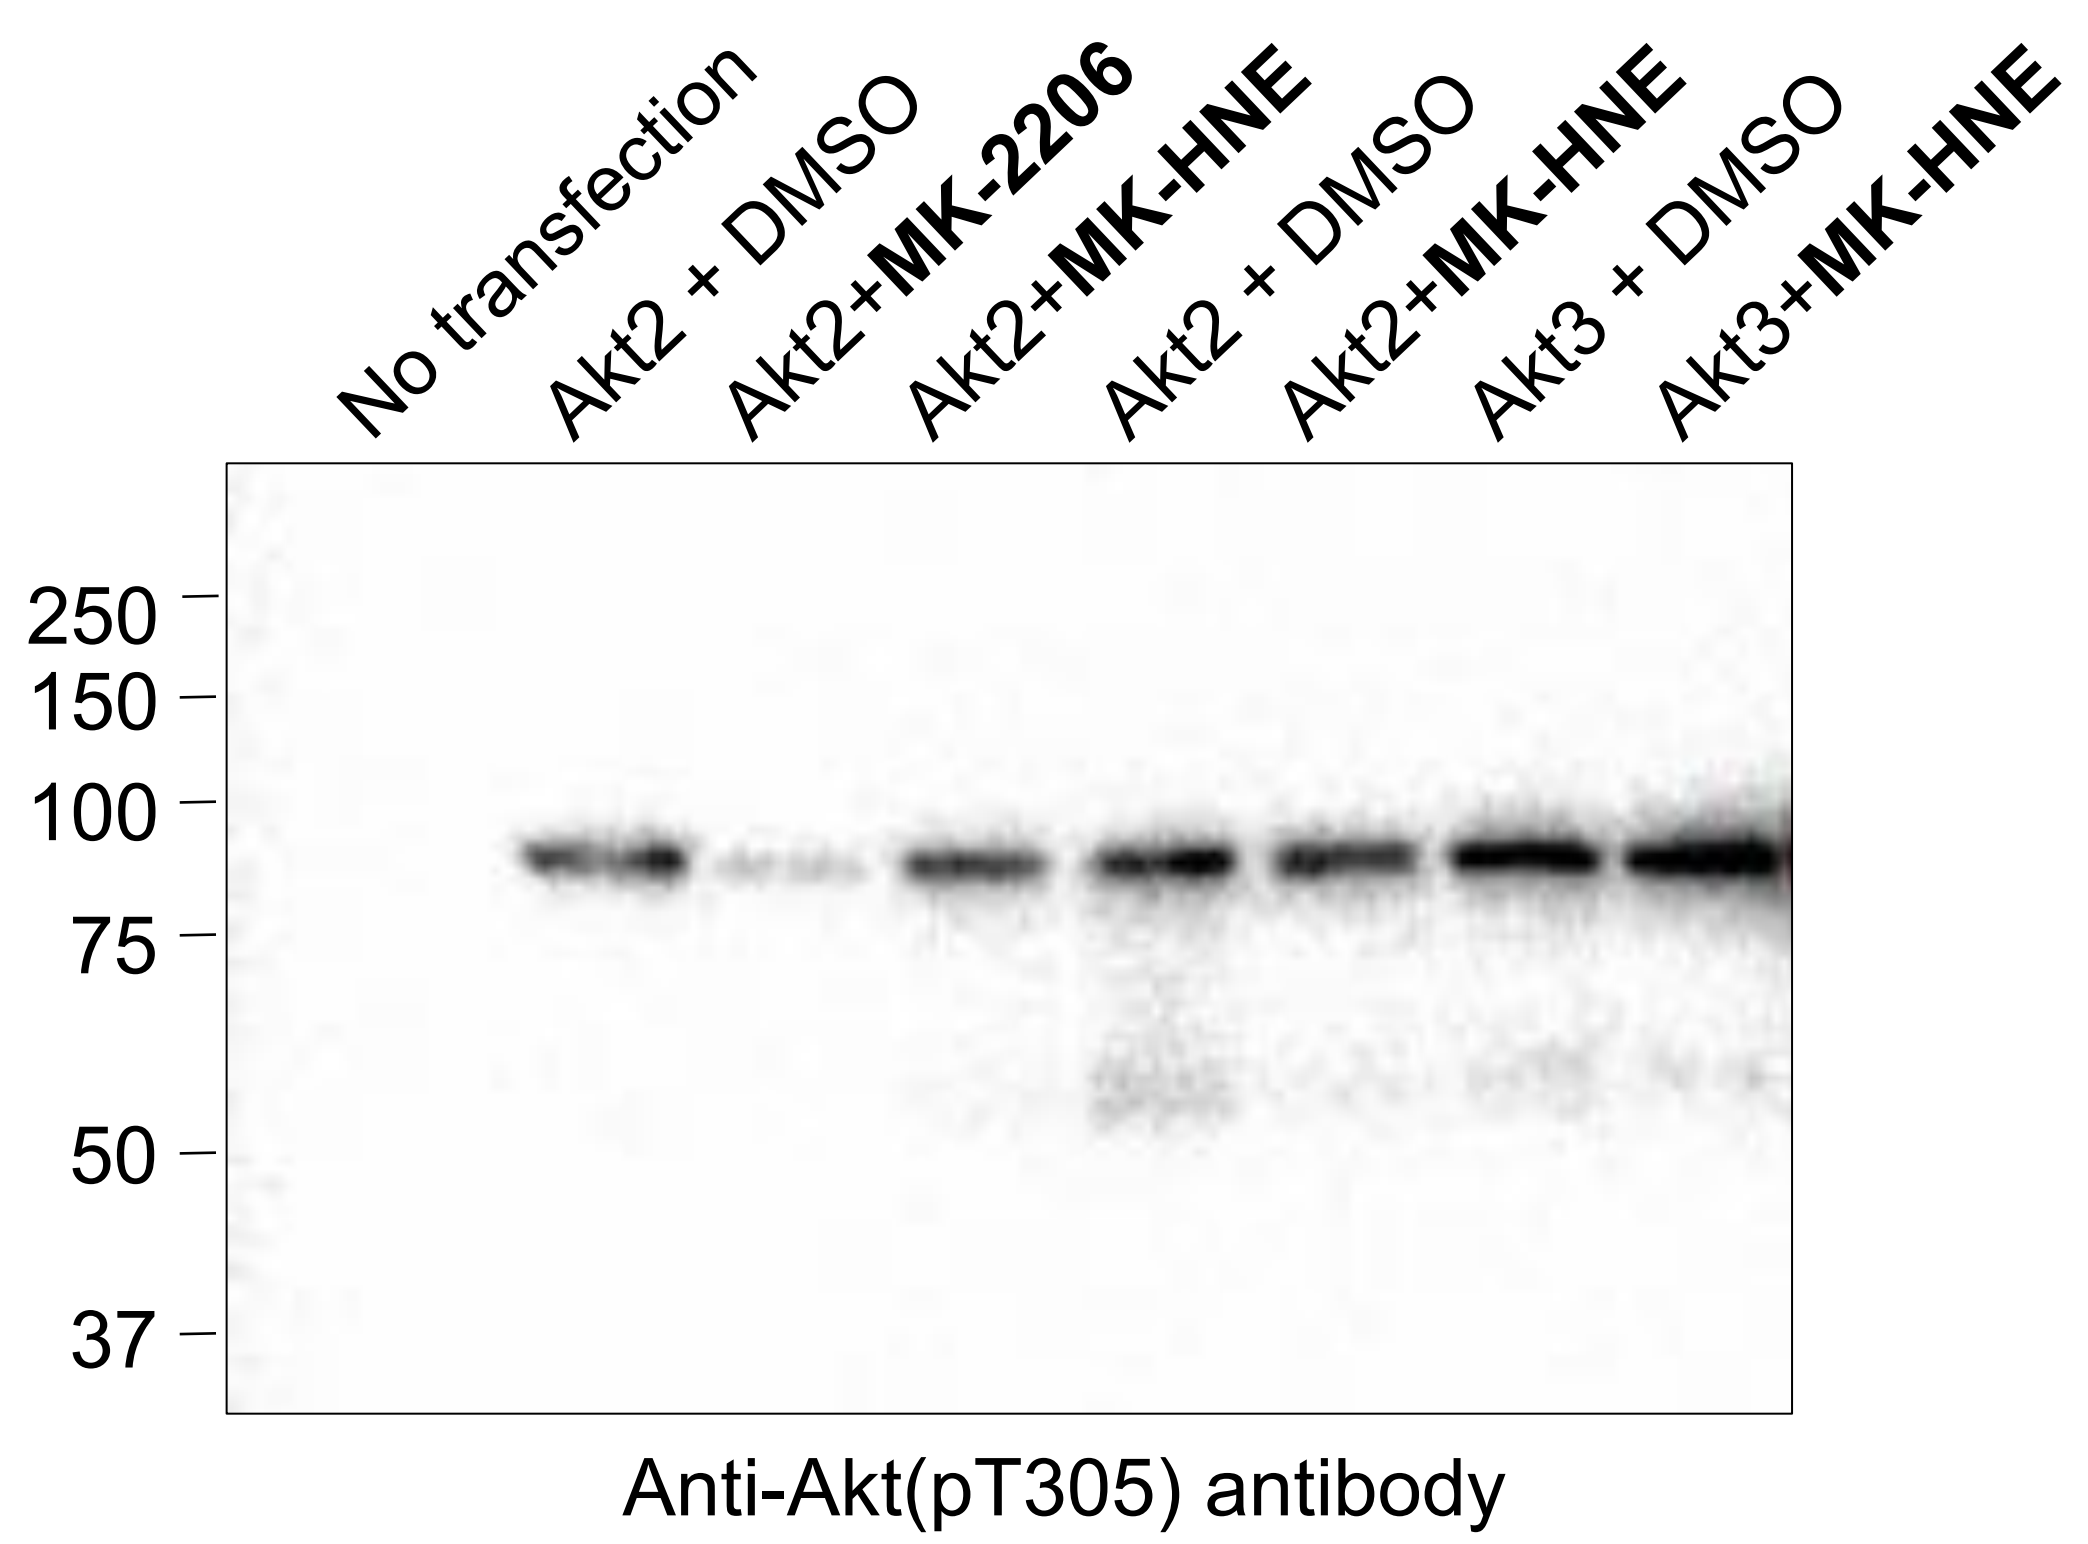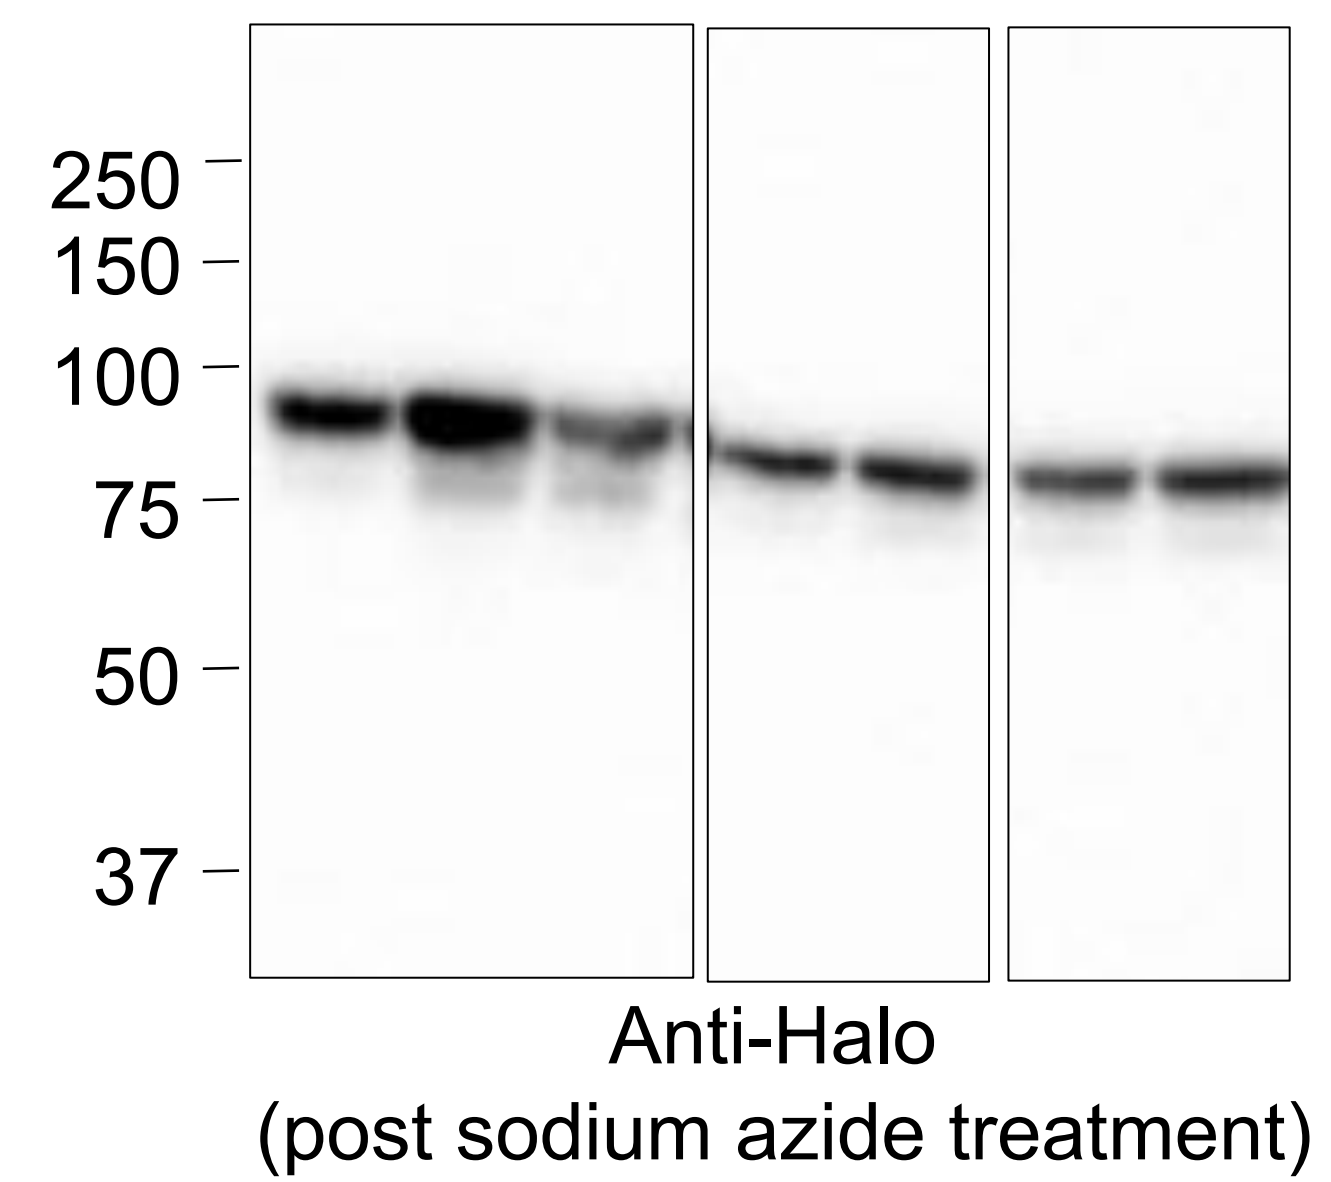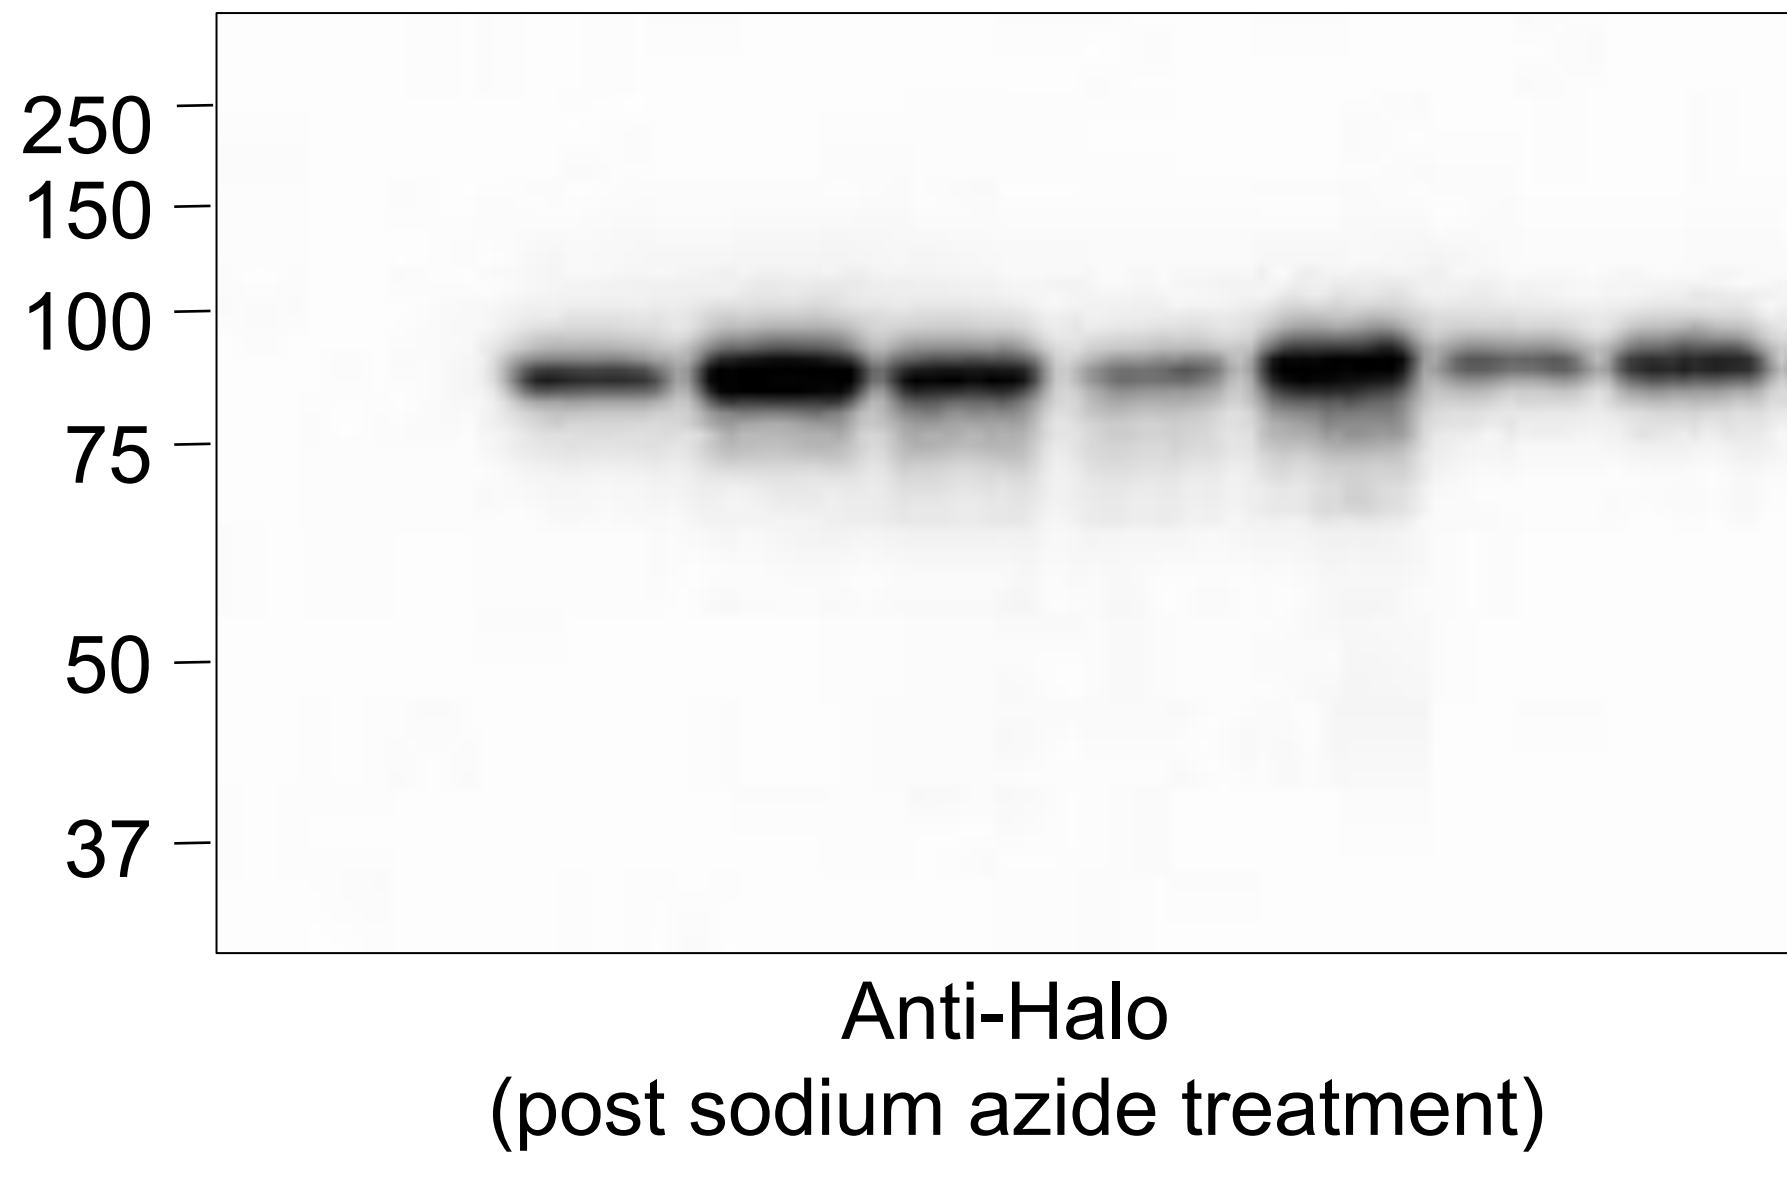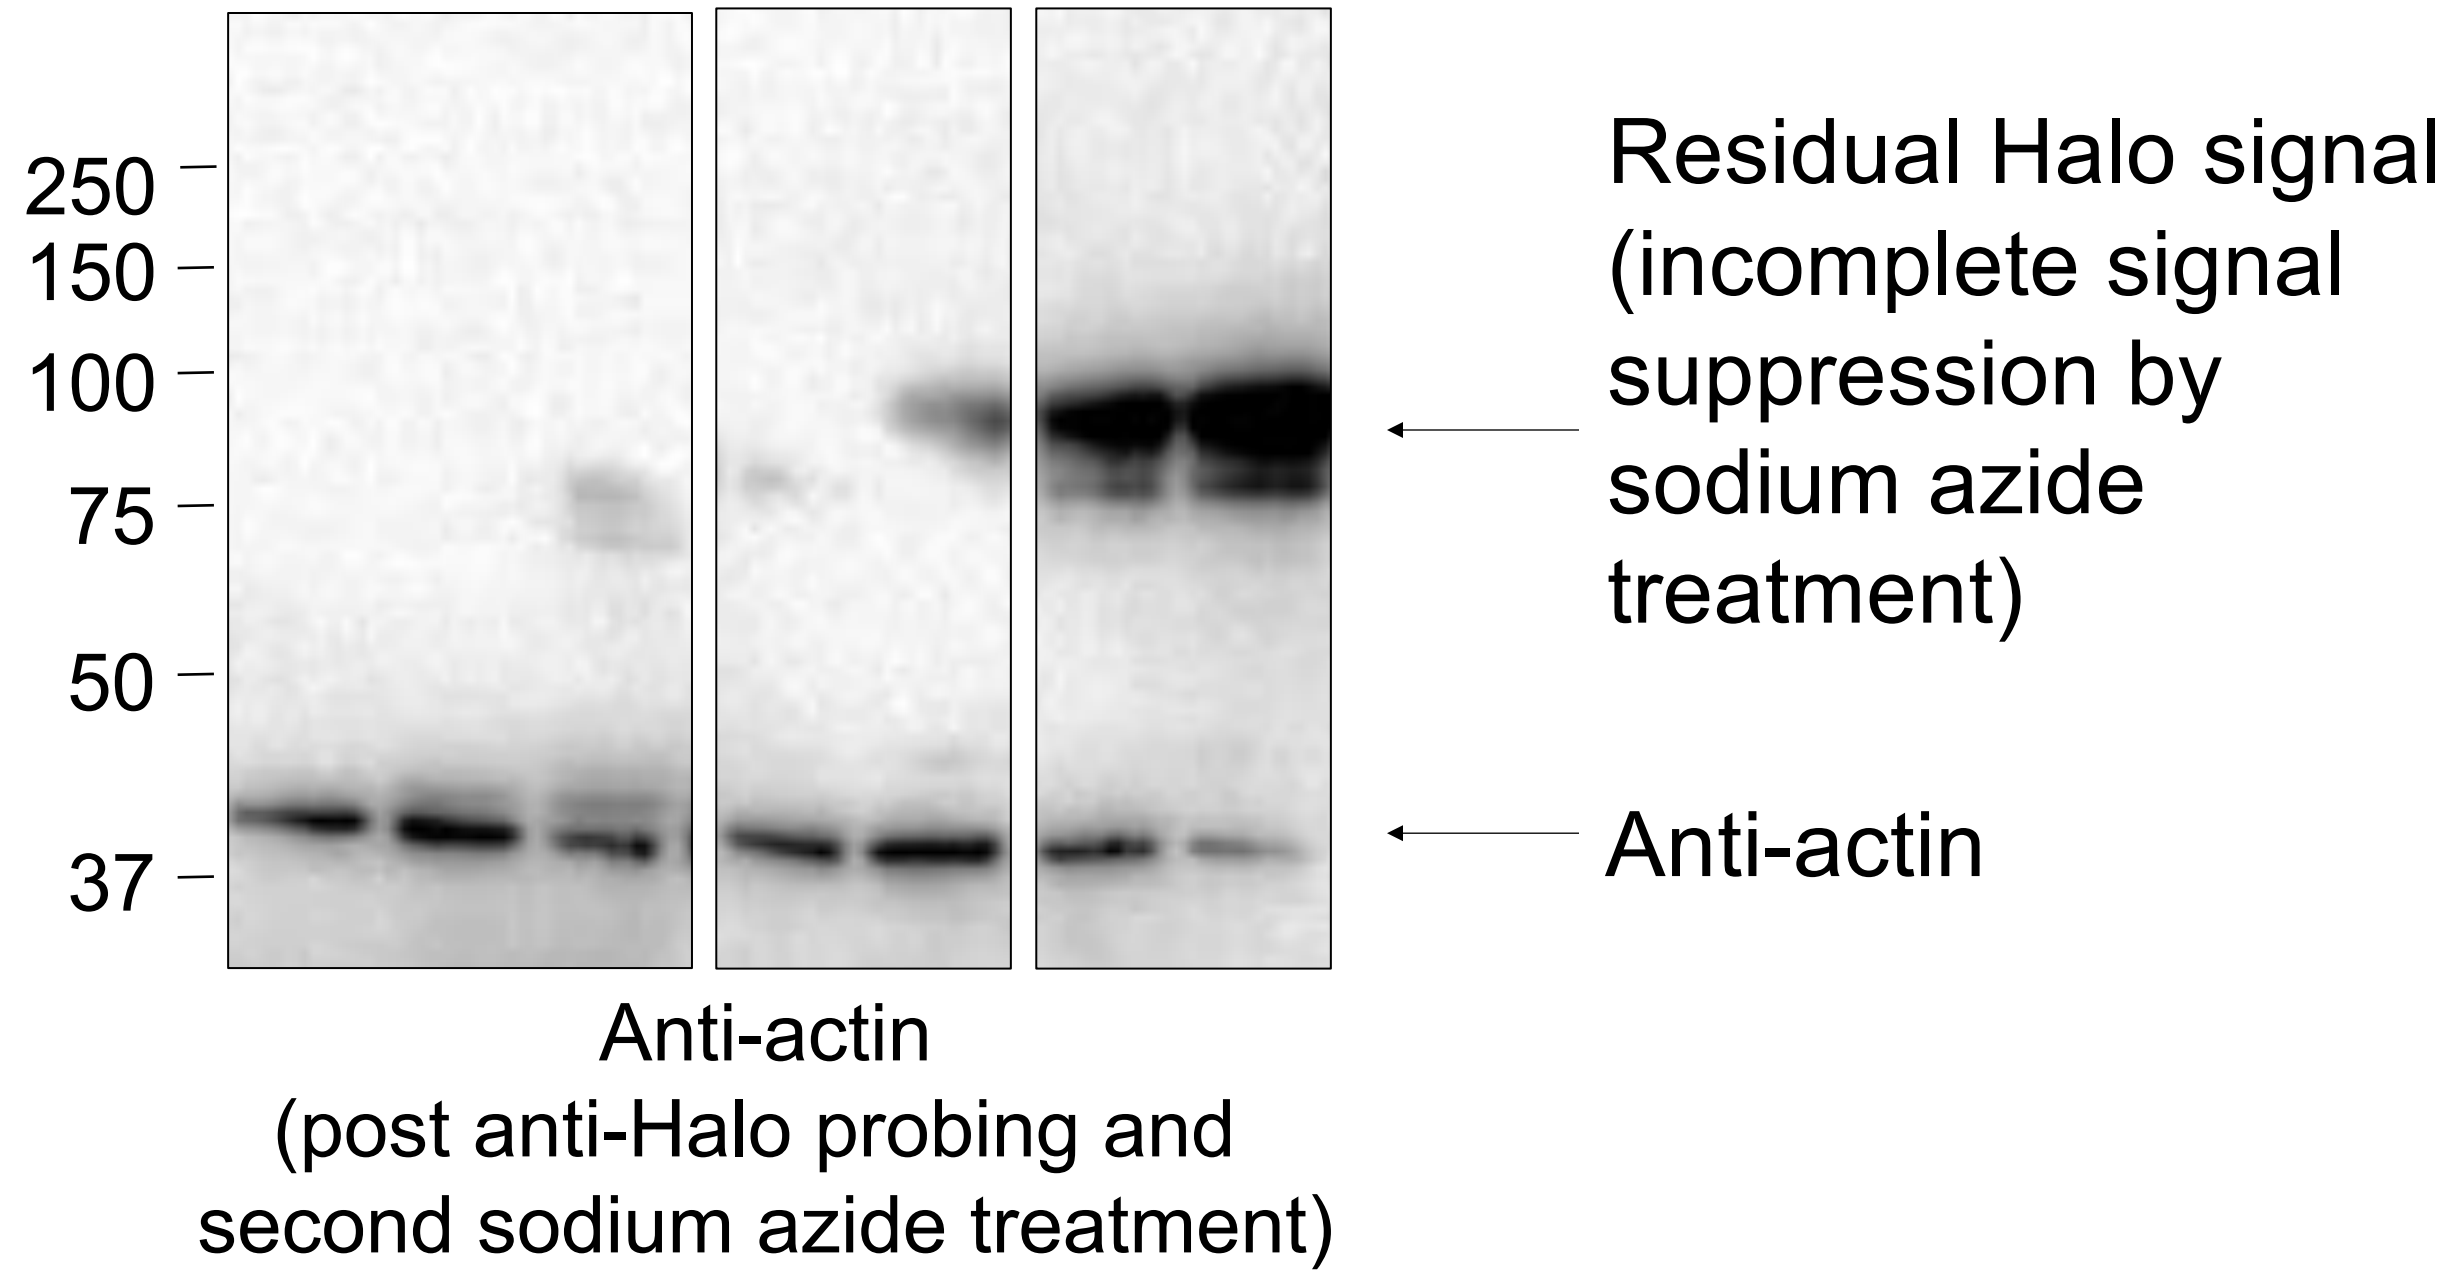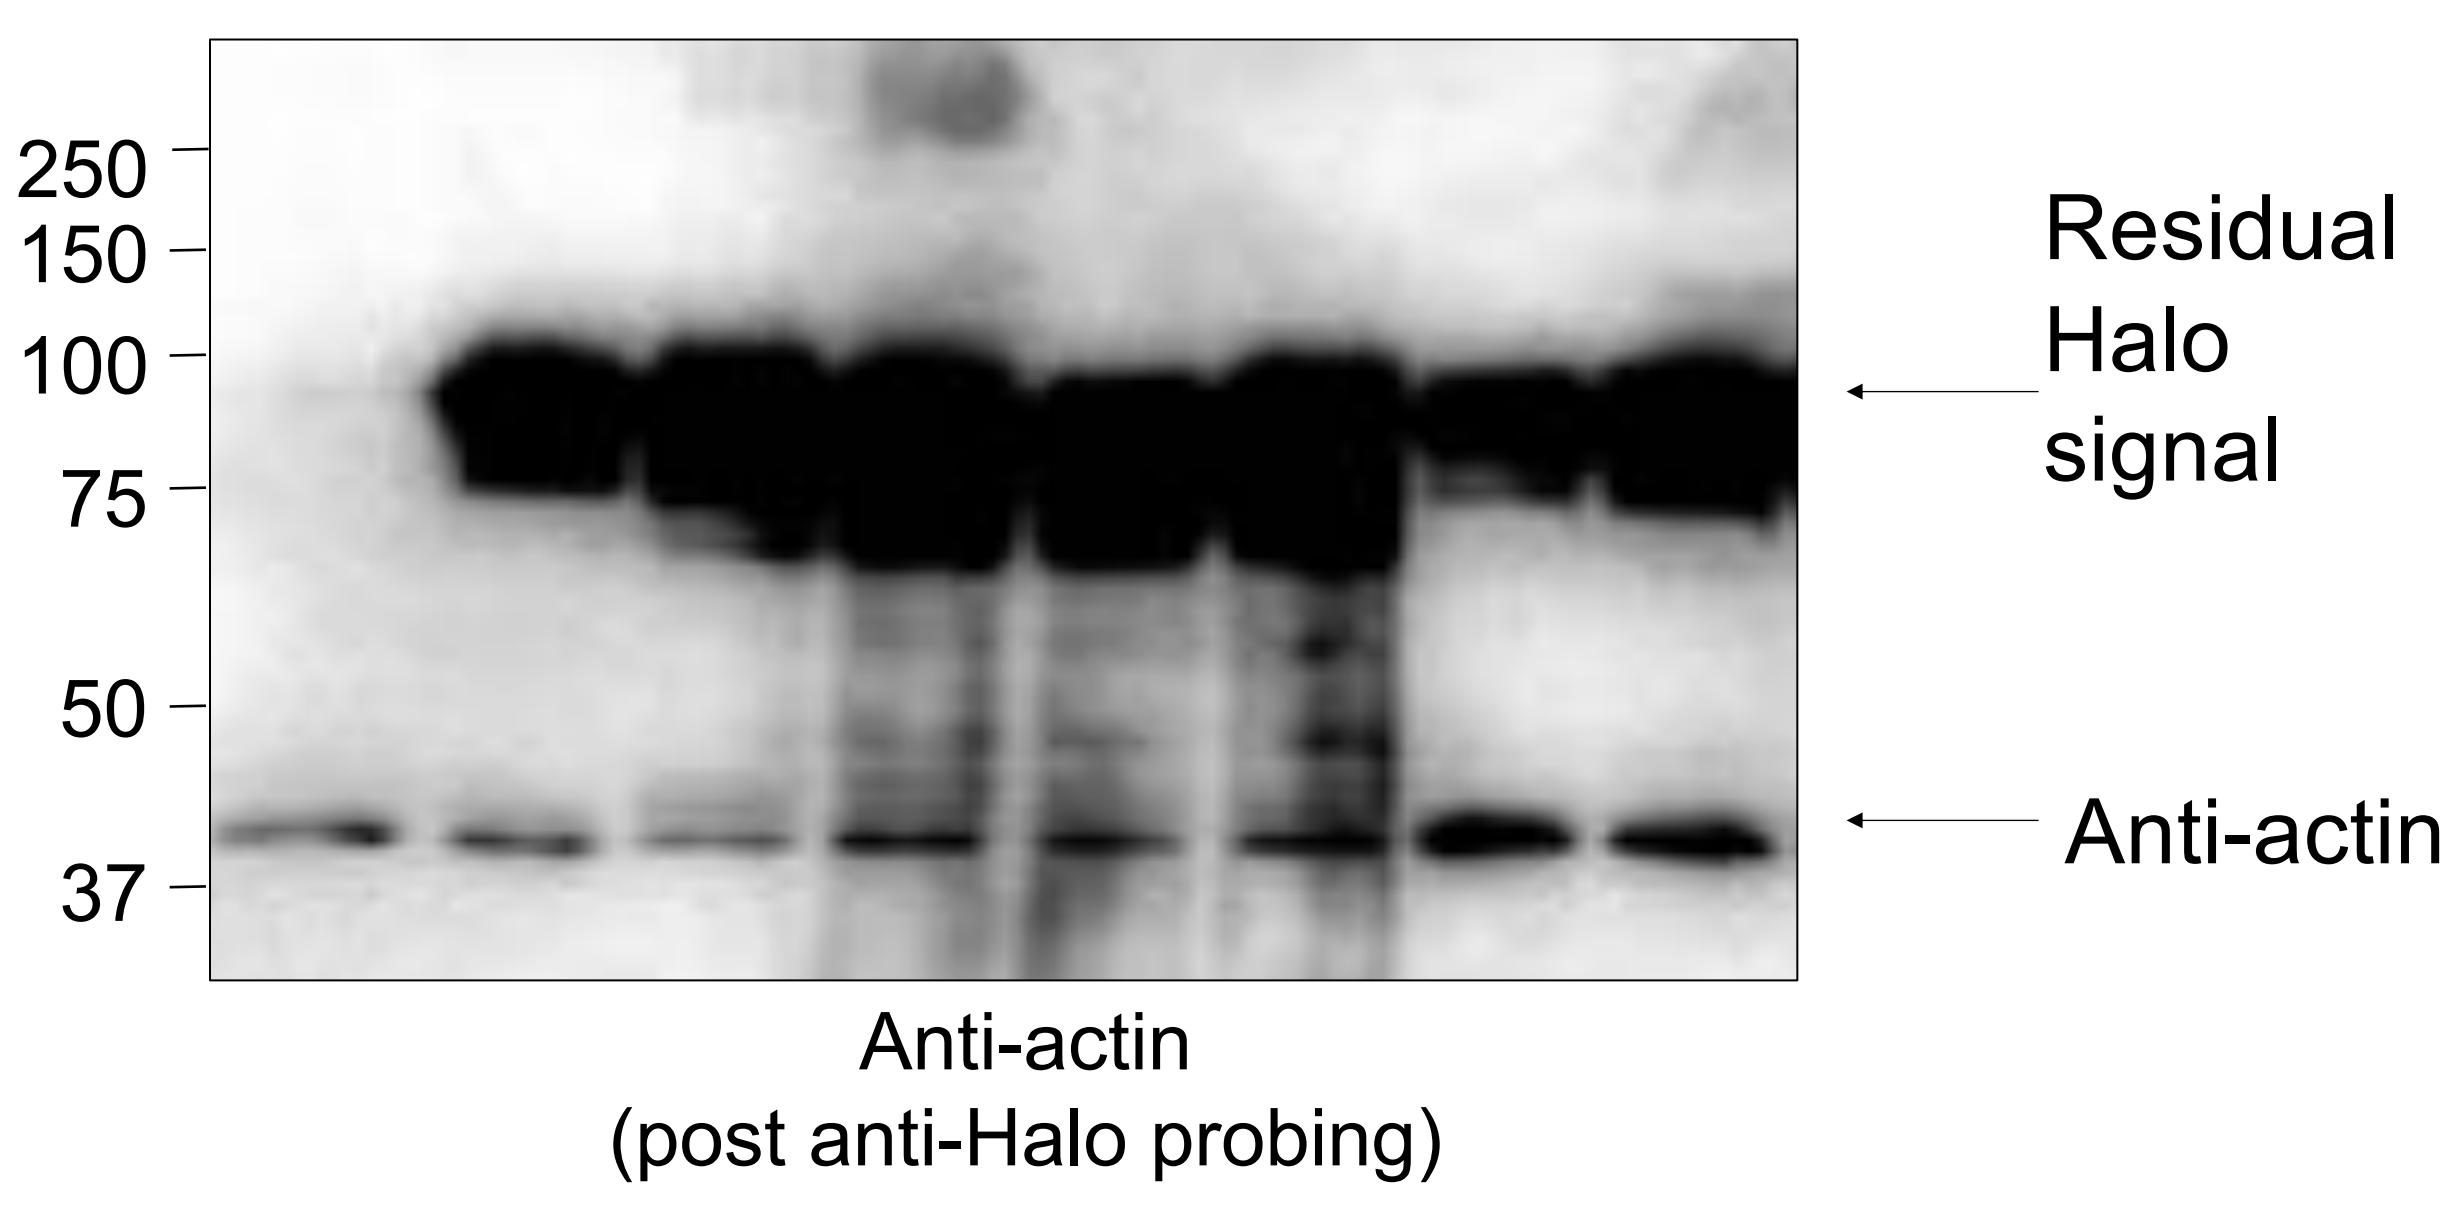

Representative replicates related to data in Supplemental Figure S6

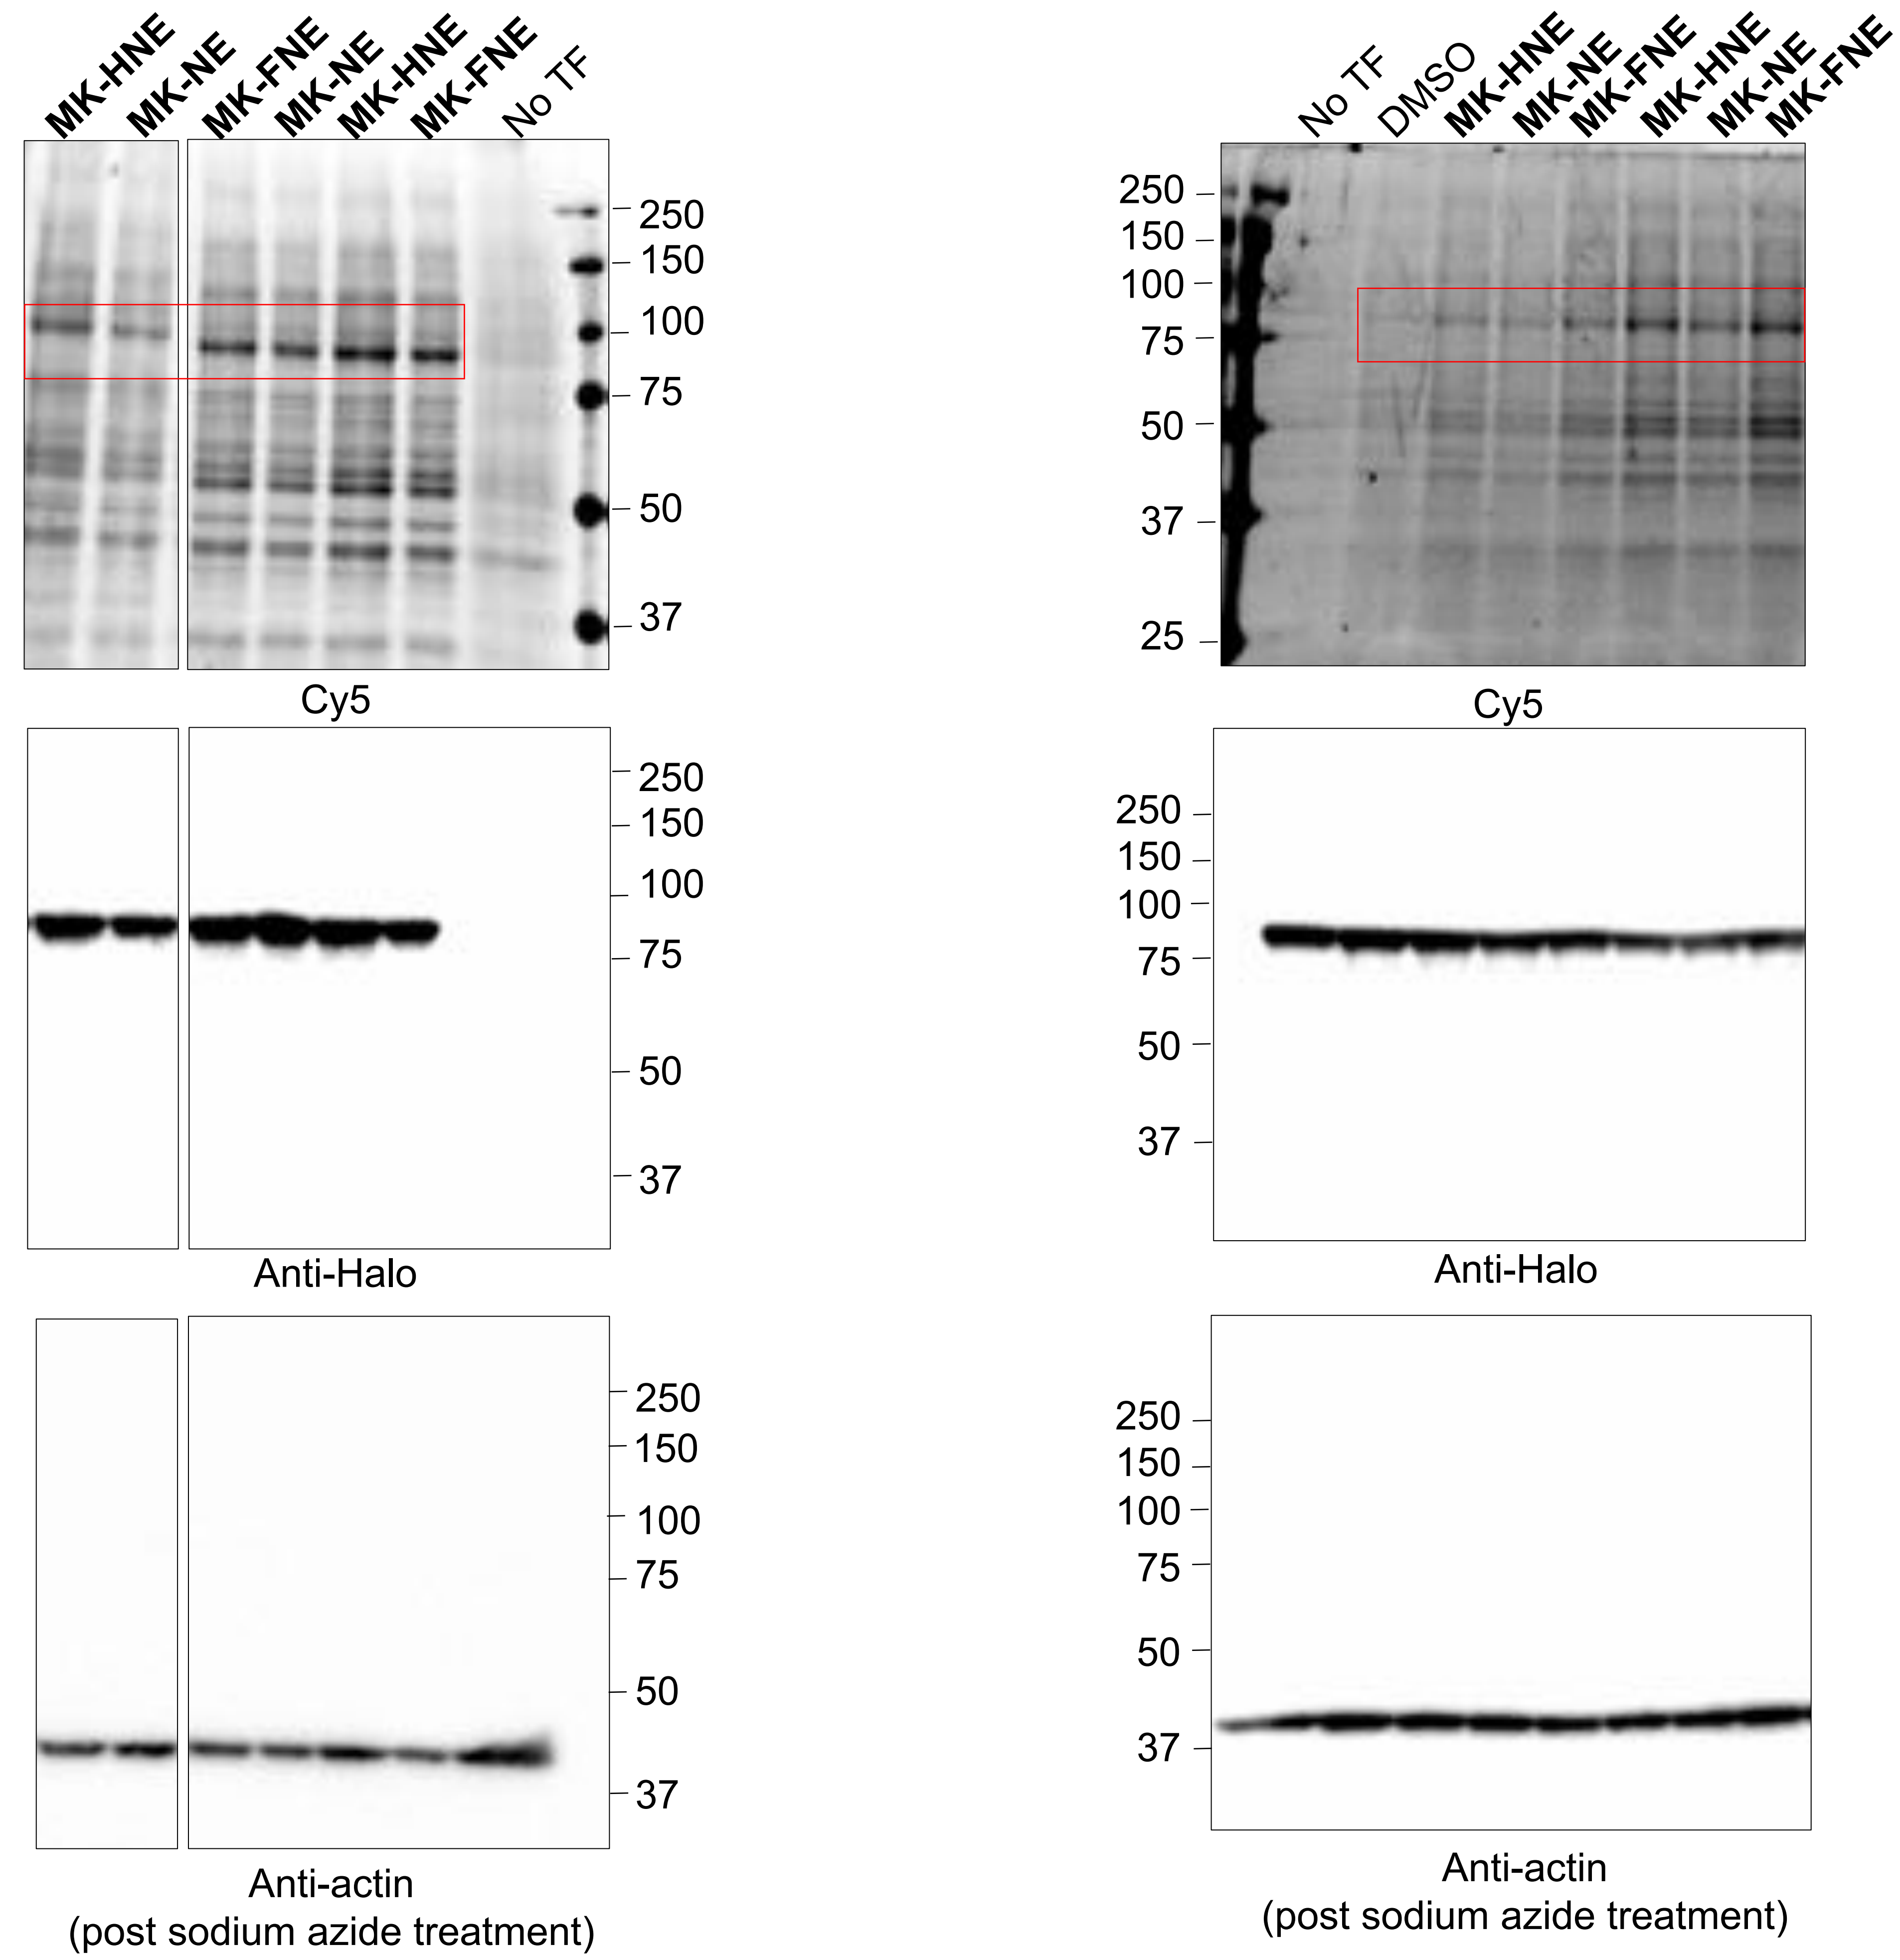

Note: Rectangular box indicates the Cy5 signal of Halo-Akt(n) used in the quantitation

# Representative replicates and full-view blots related to data in Supplemental Figure S10b

MK-res (MK-2206-resistant cells)

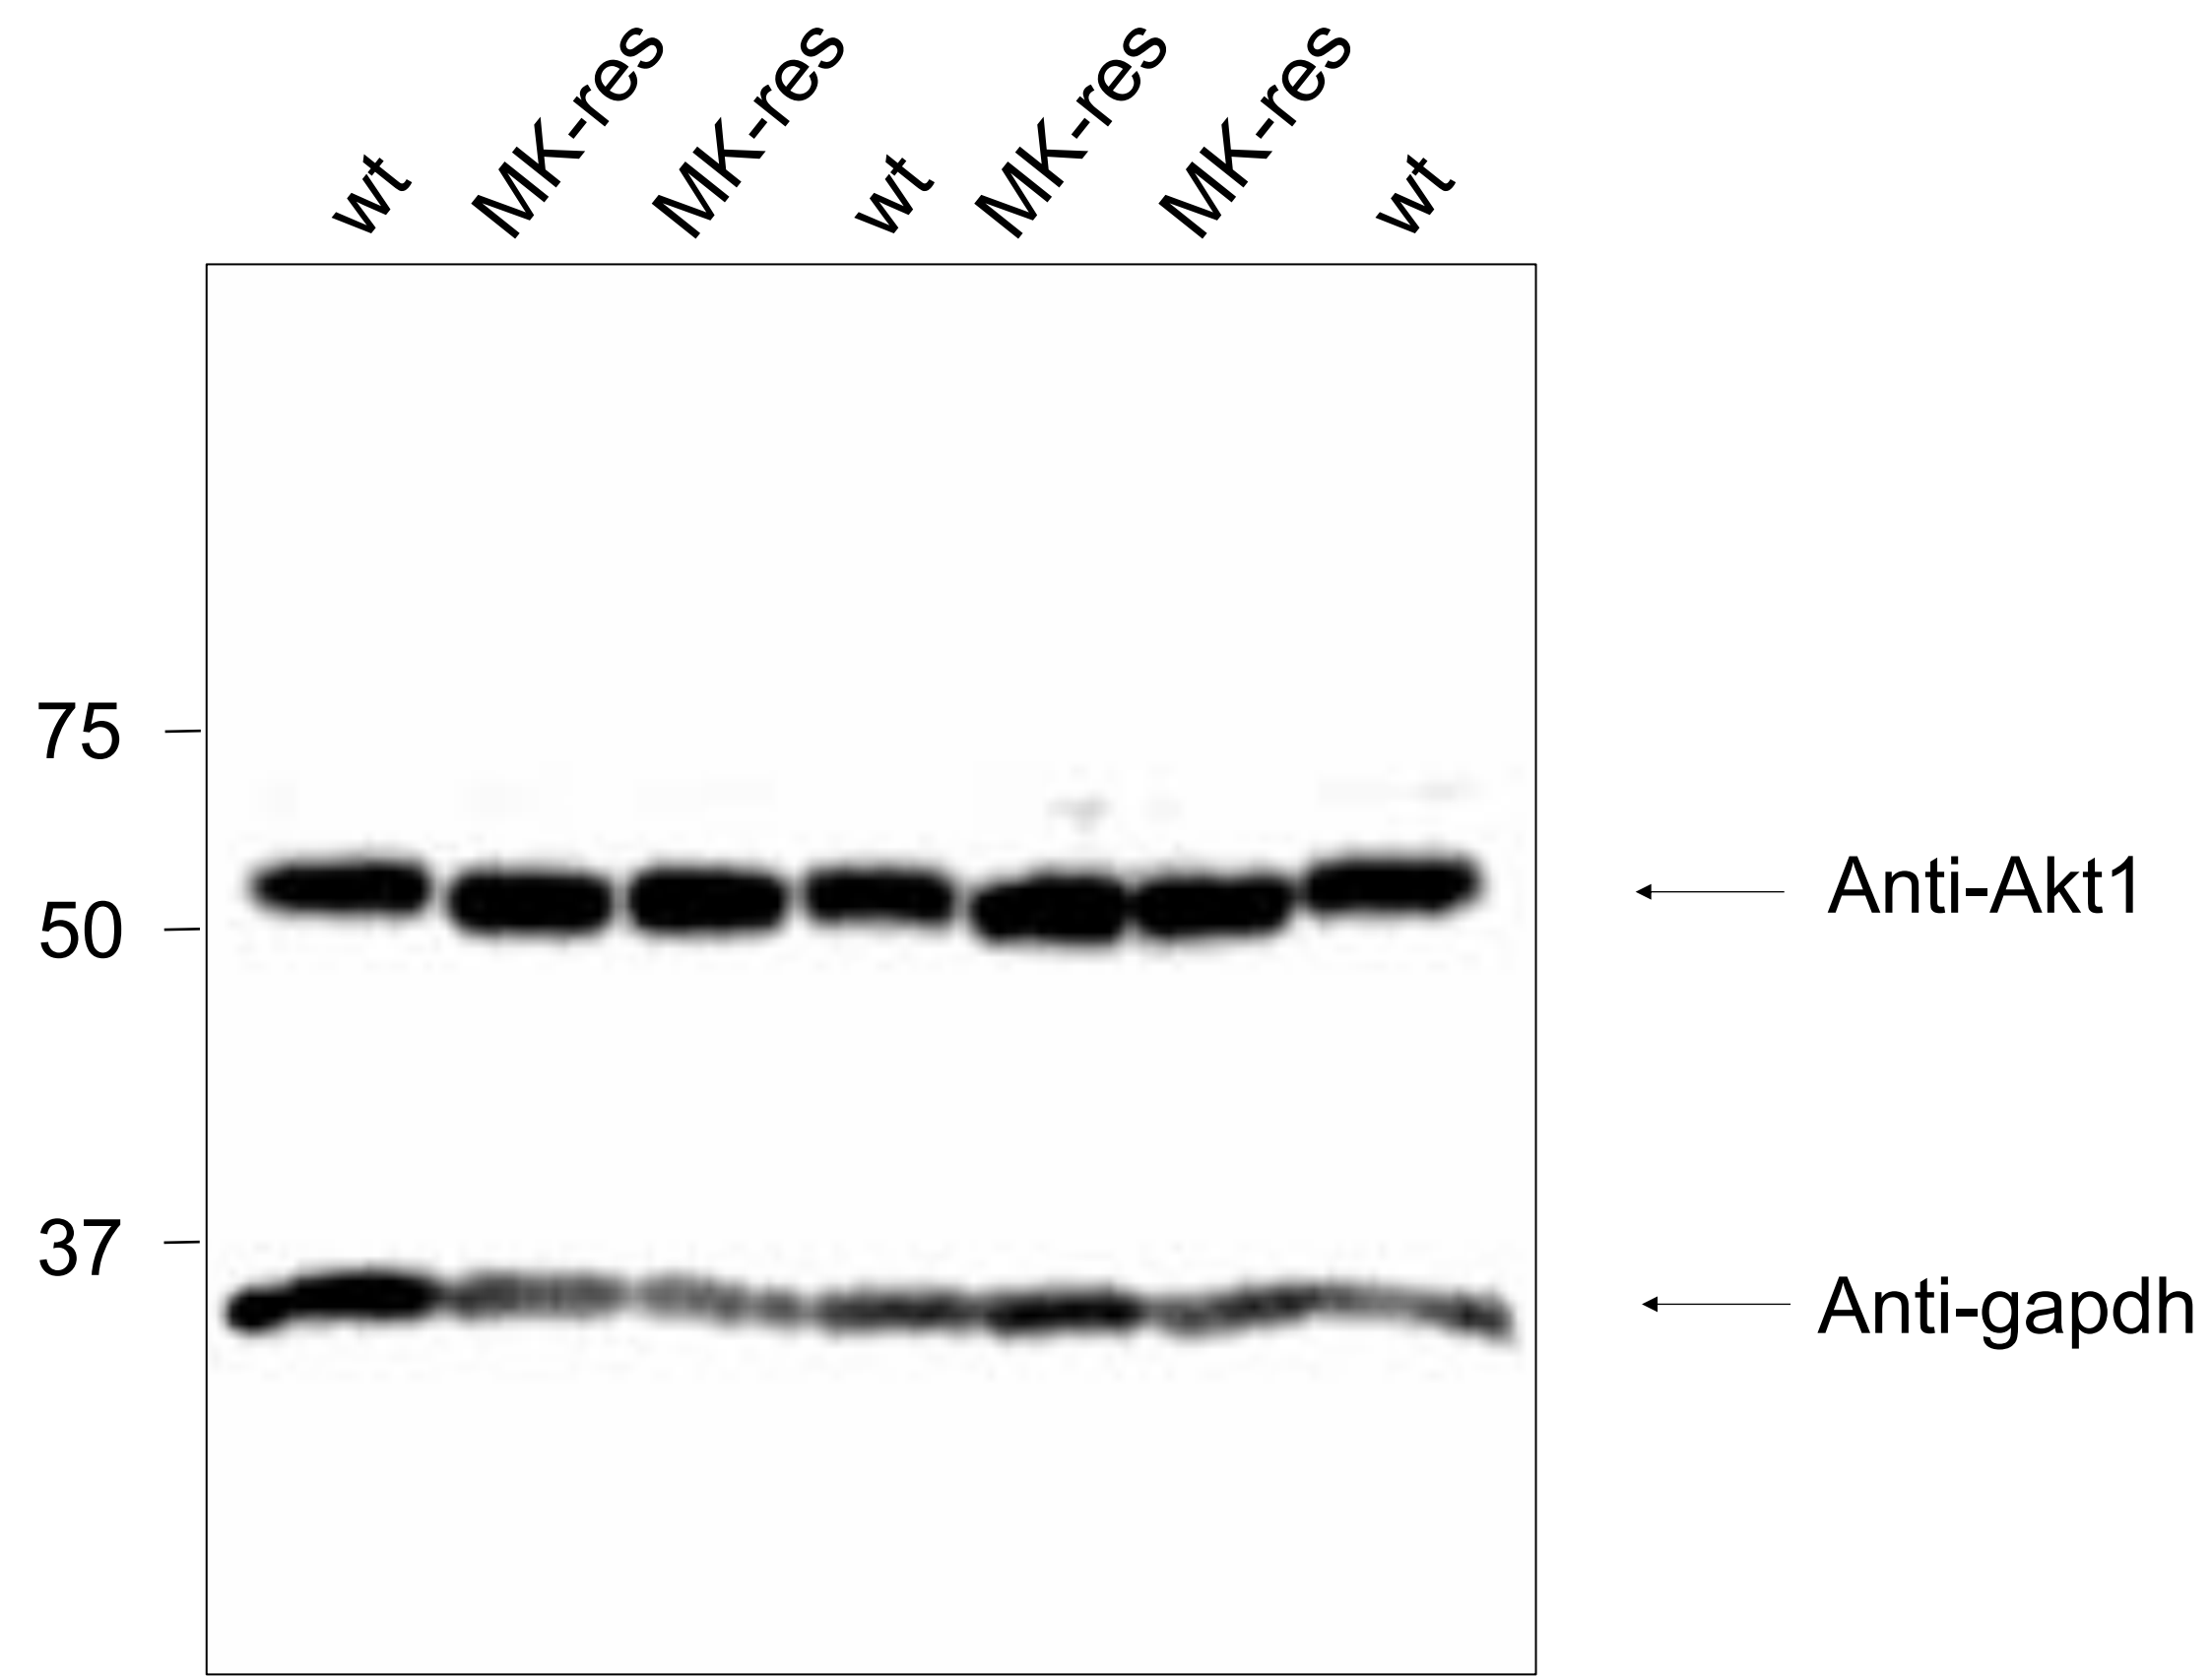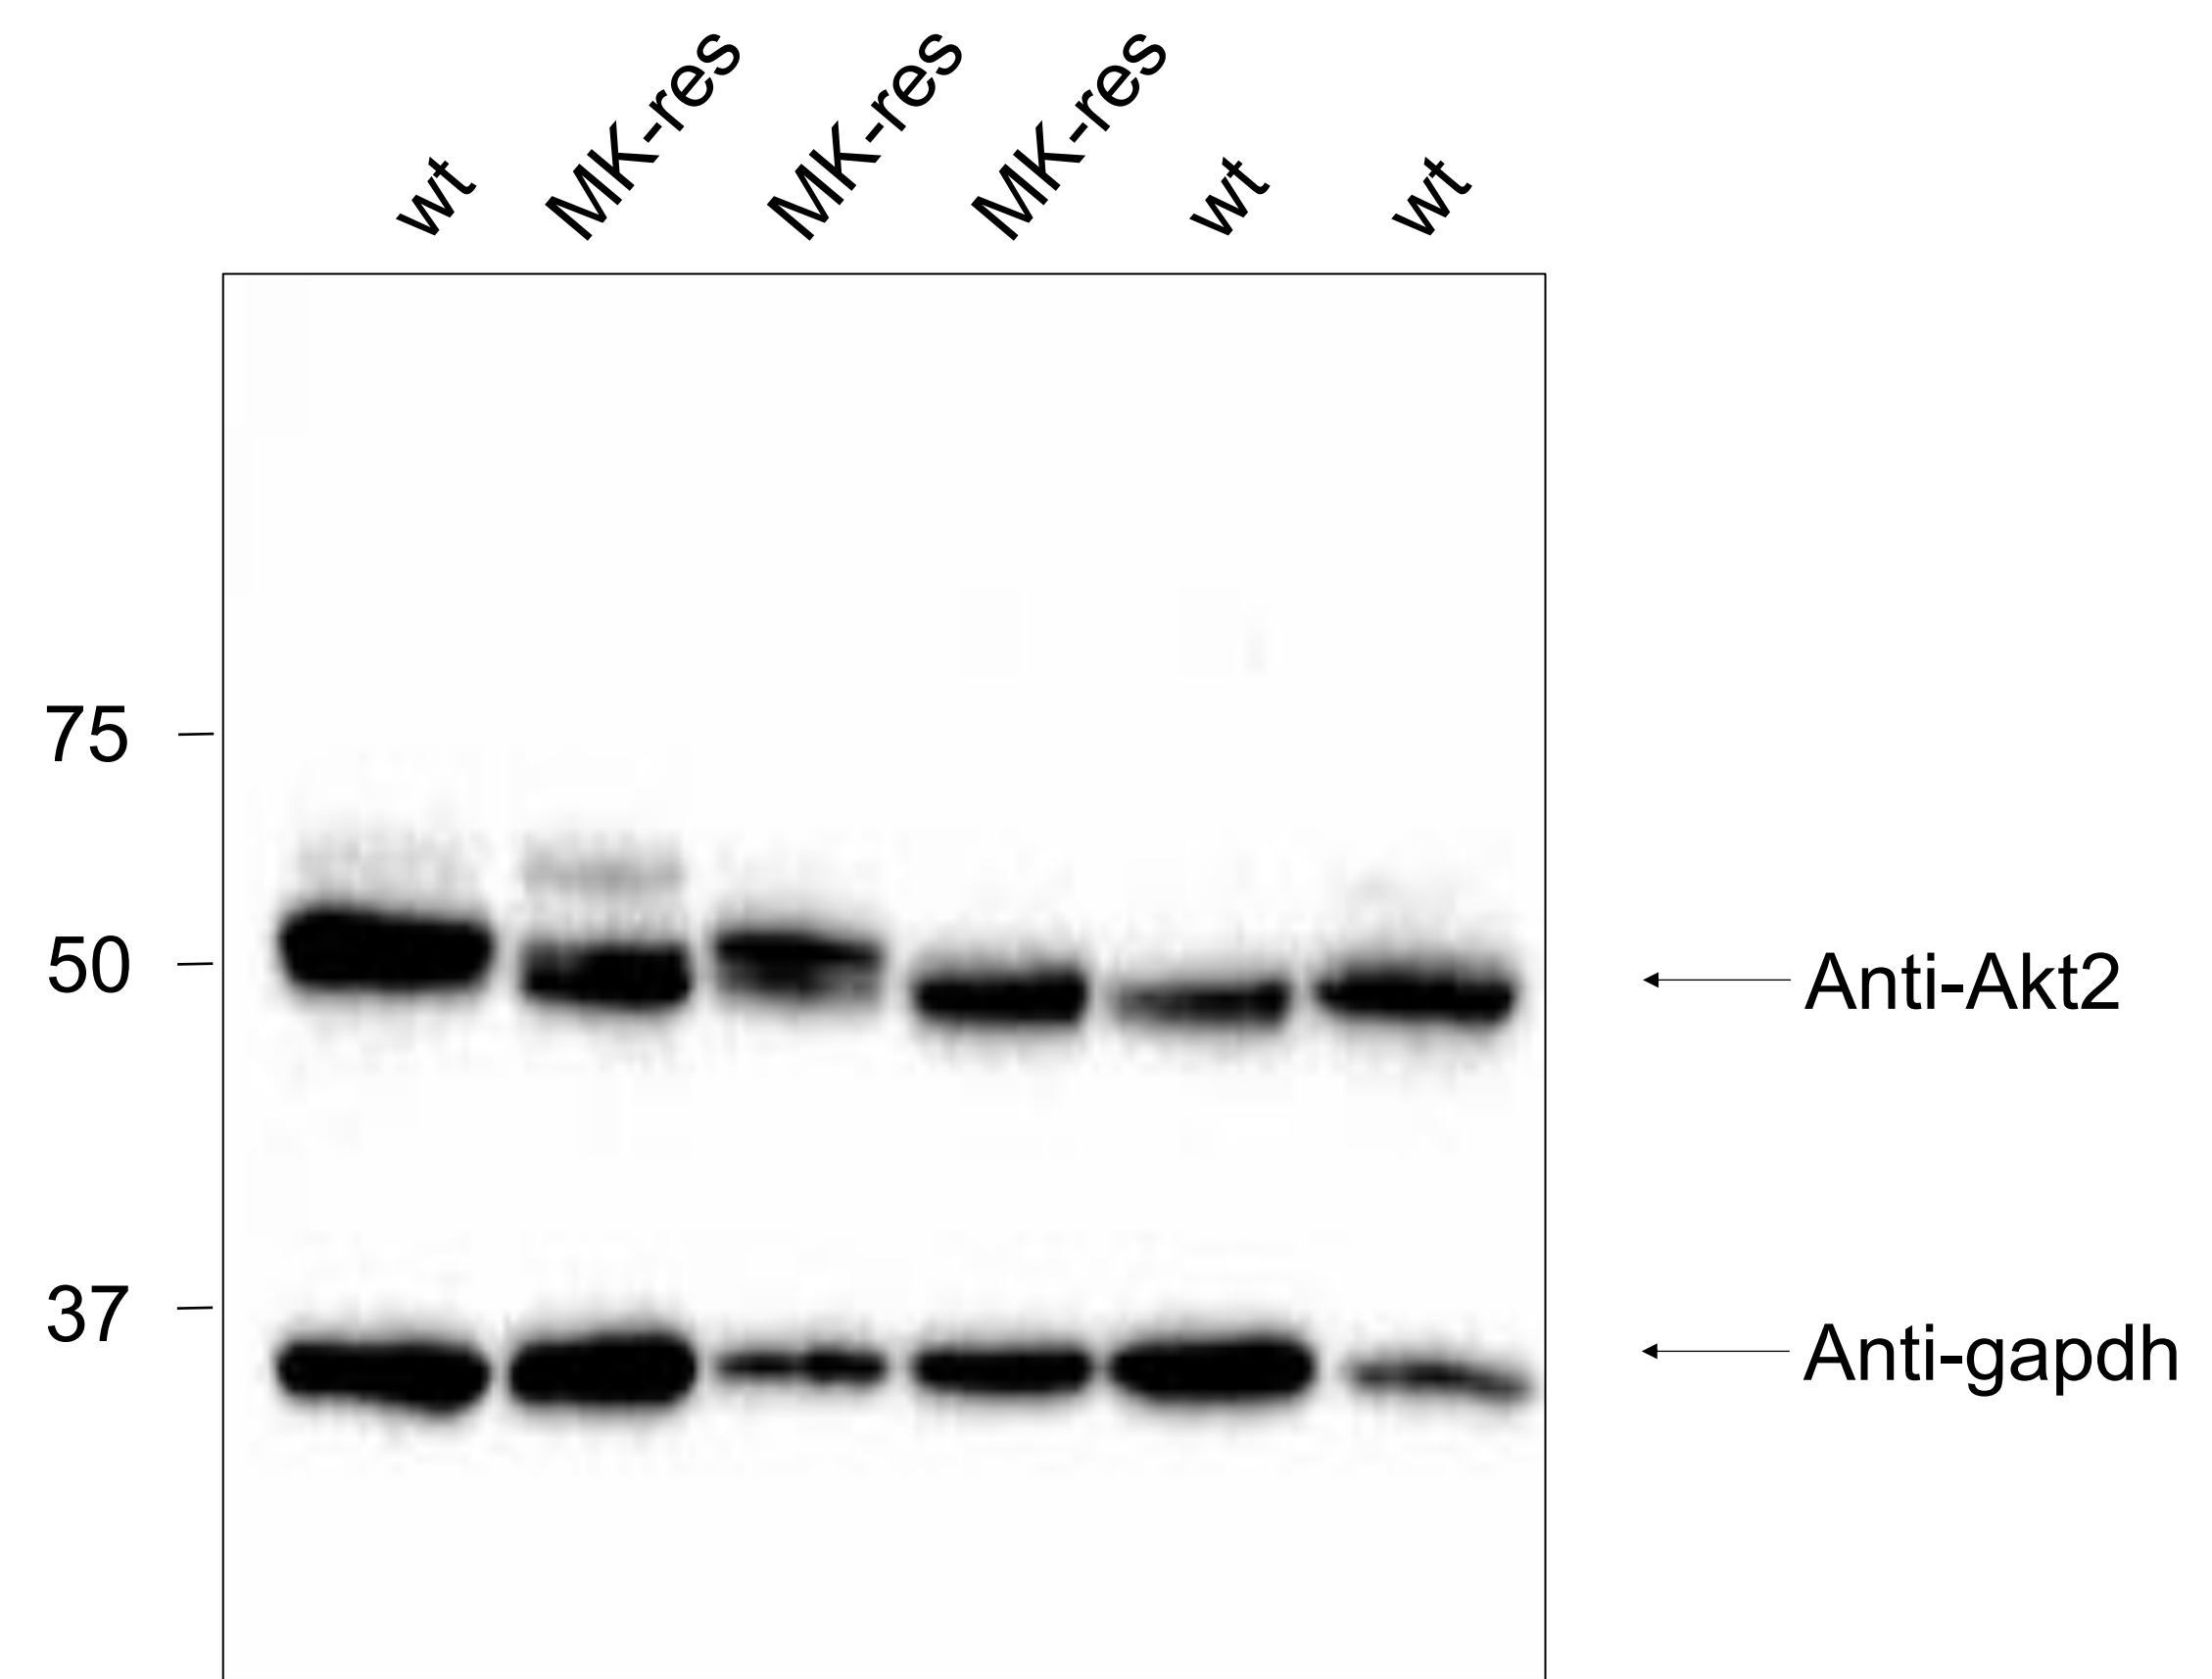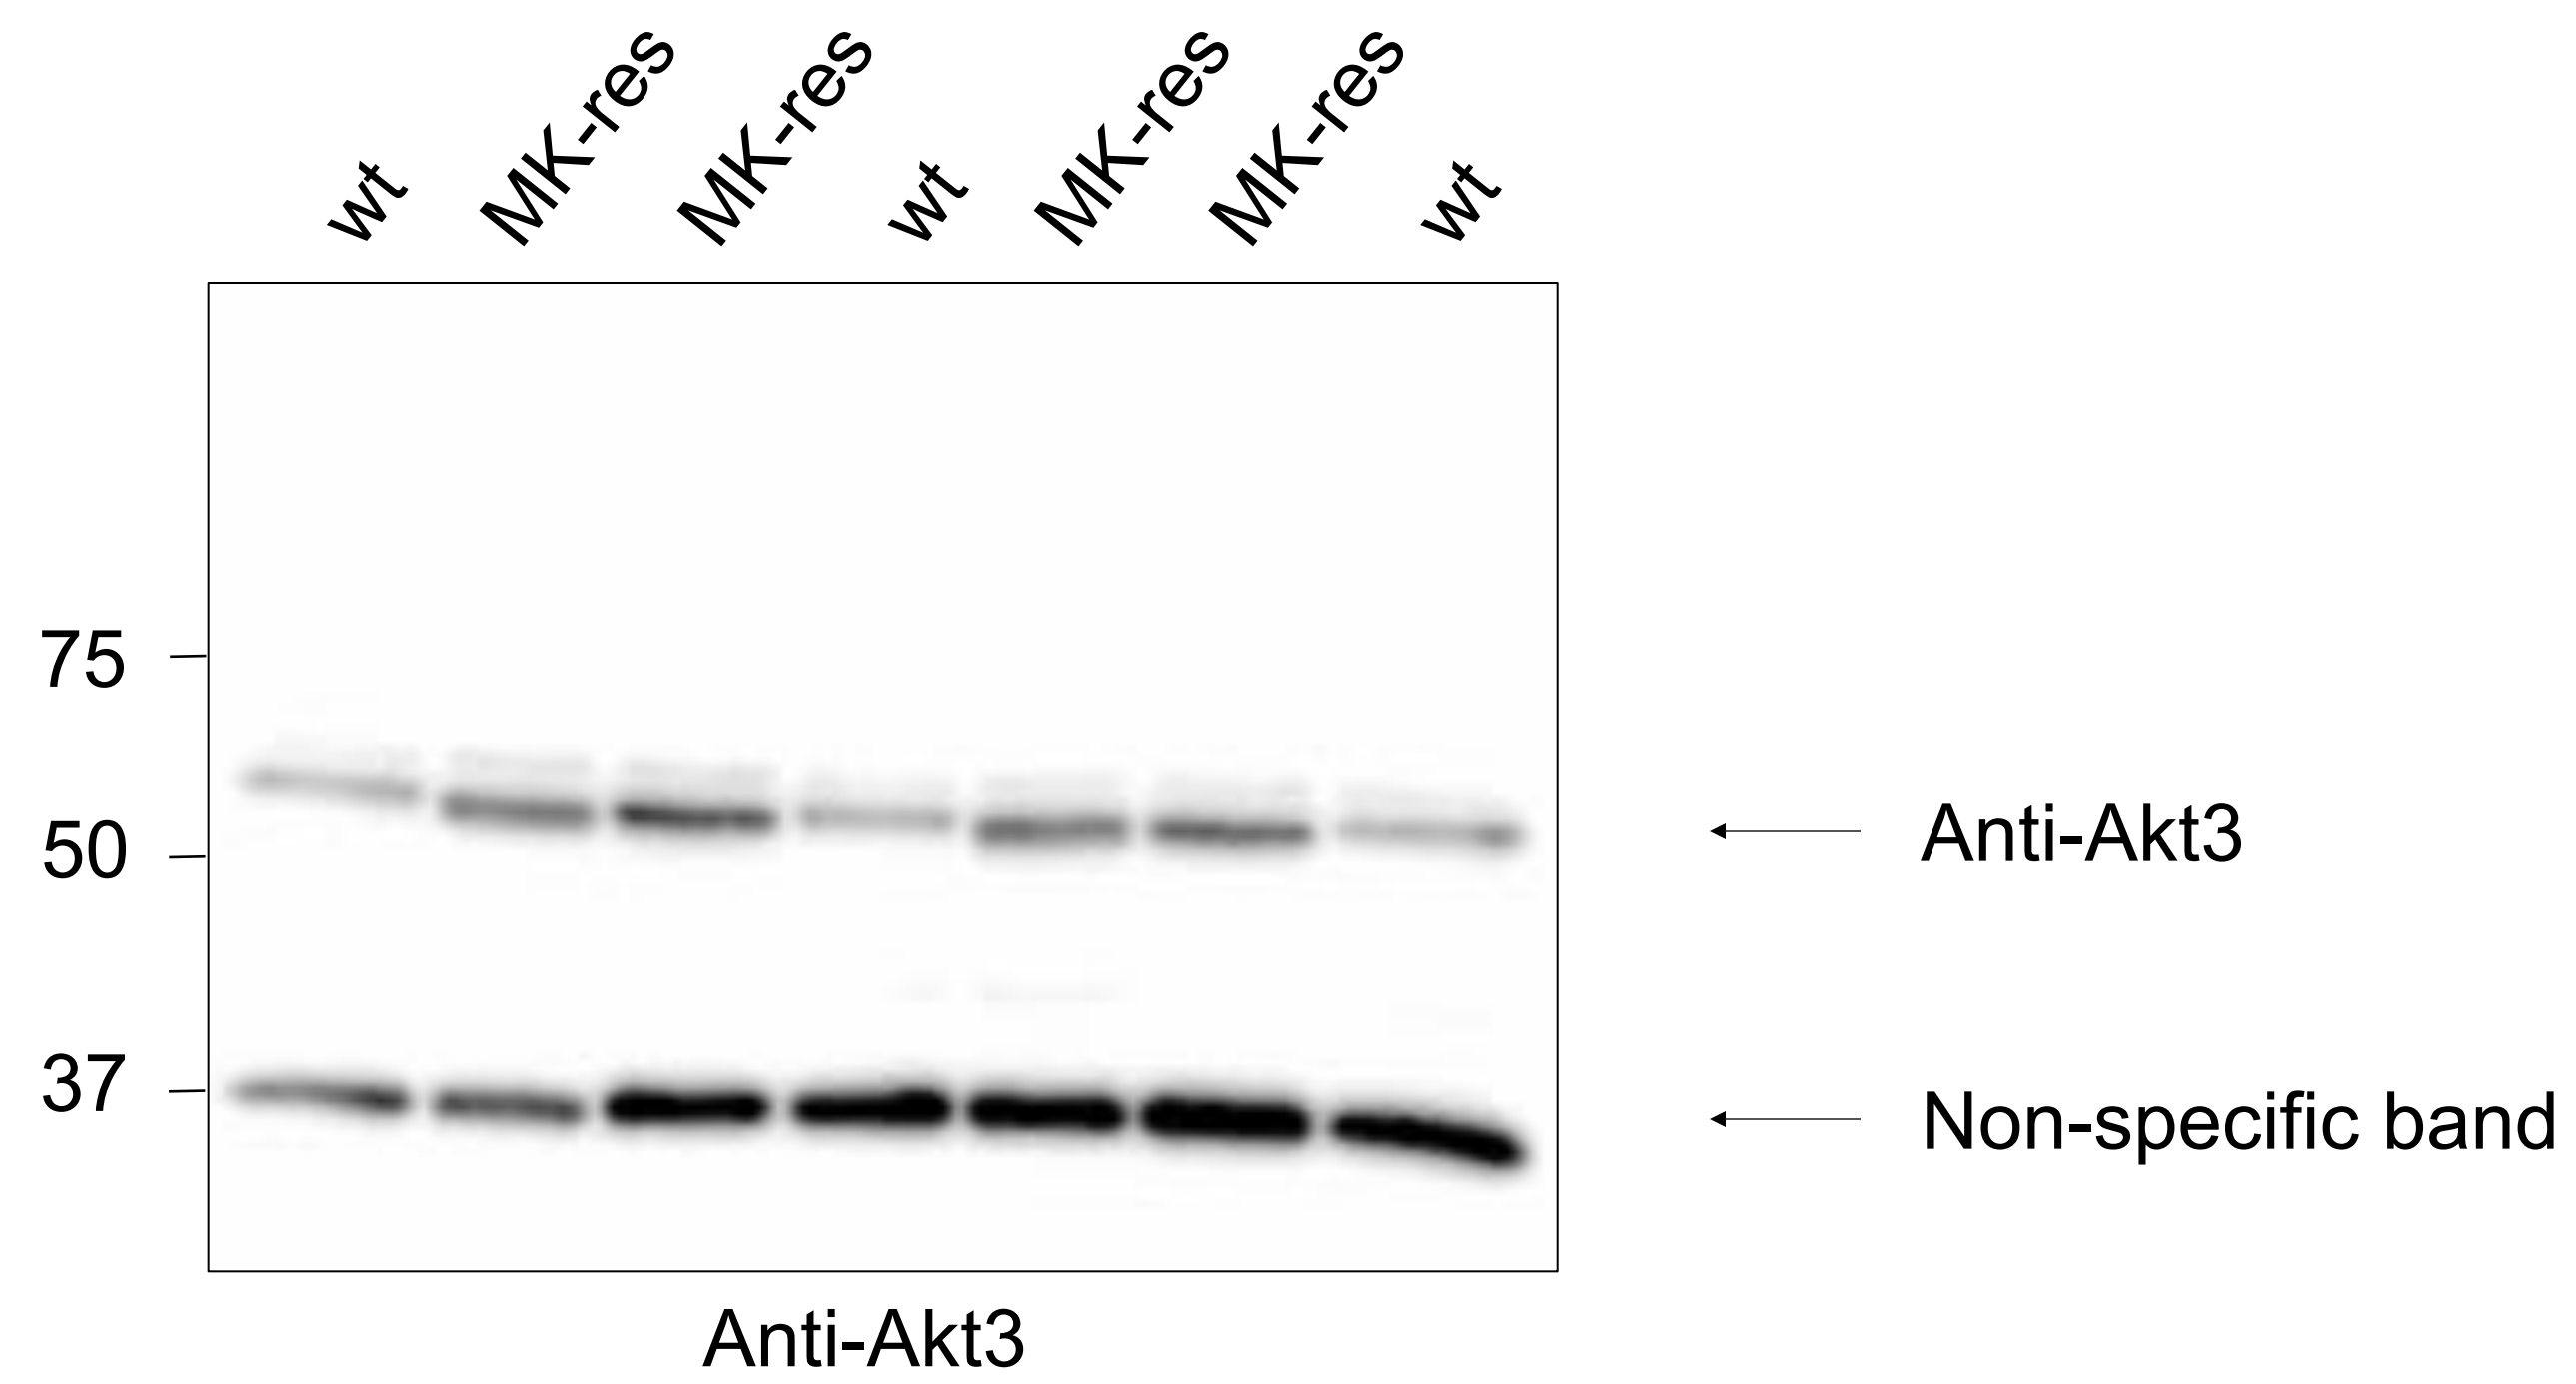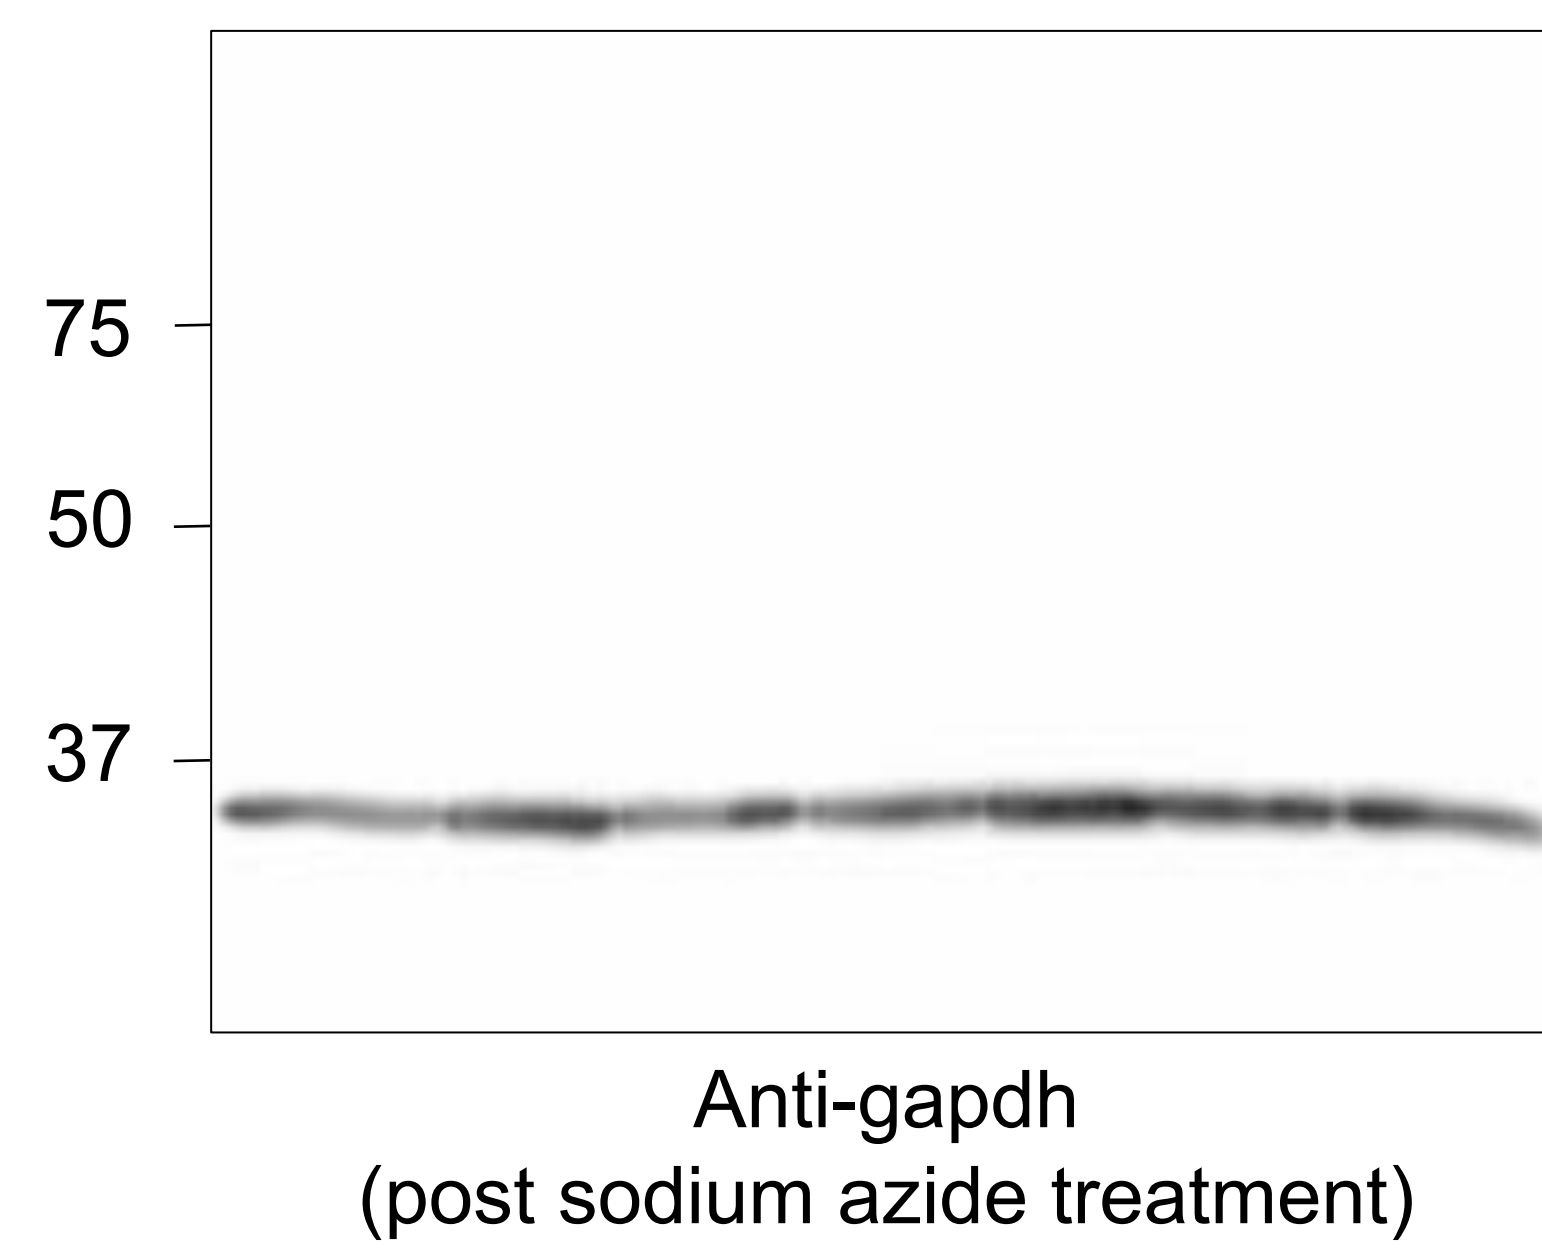

**Representative replicates related to data in Supplemental Figure S11**

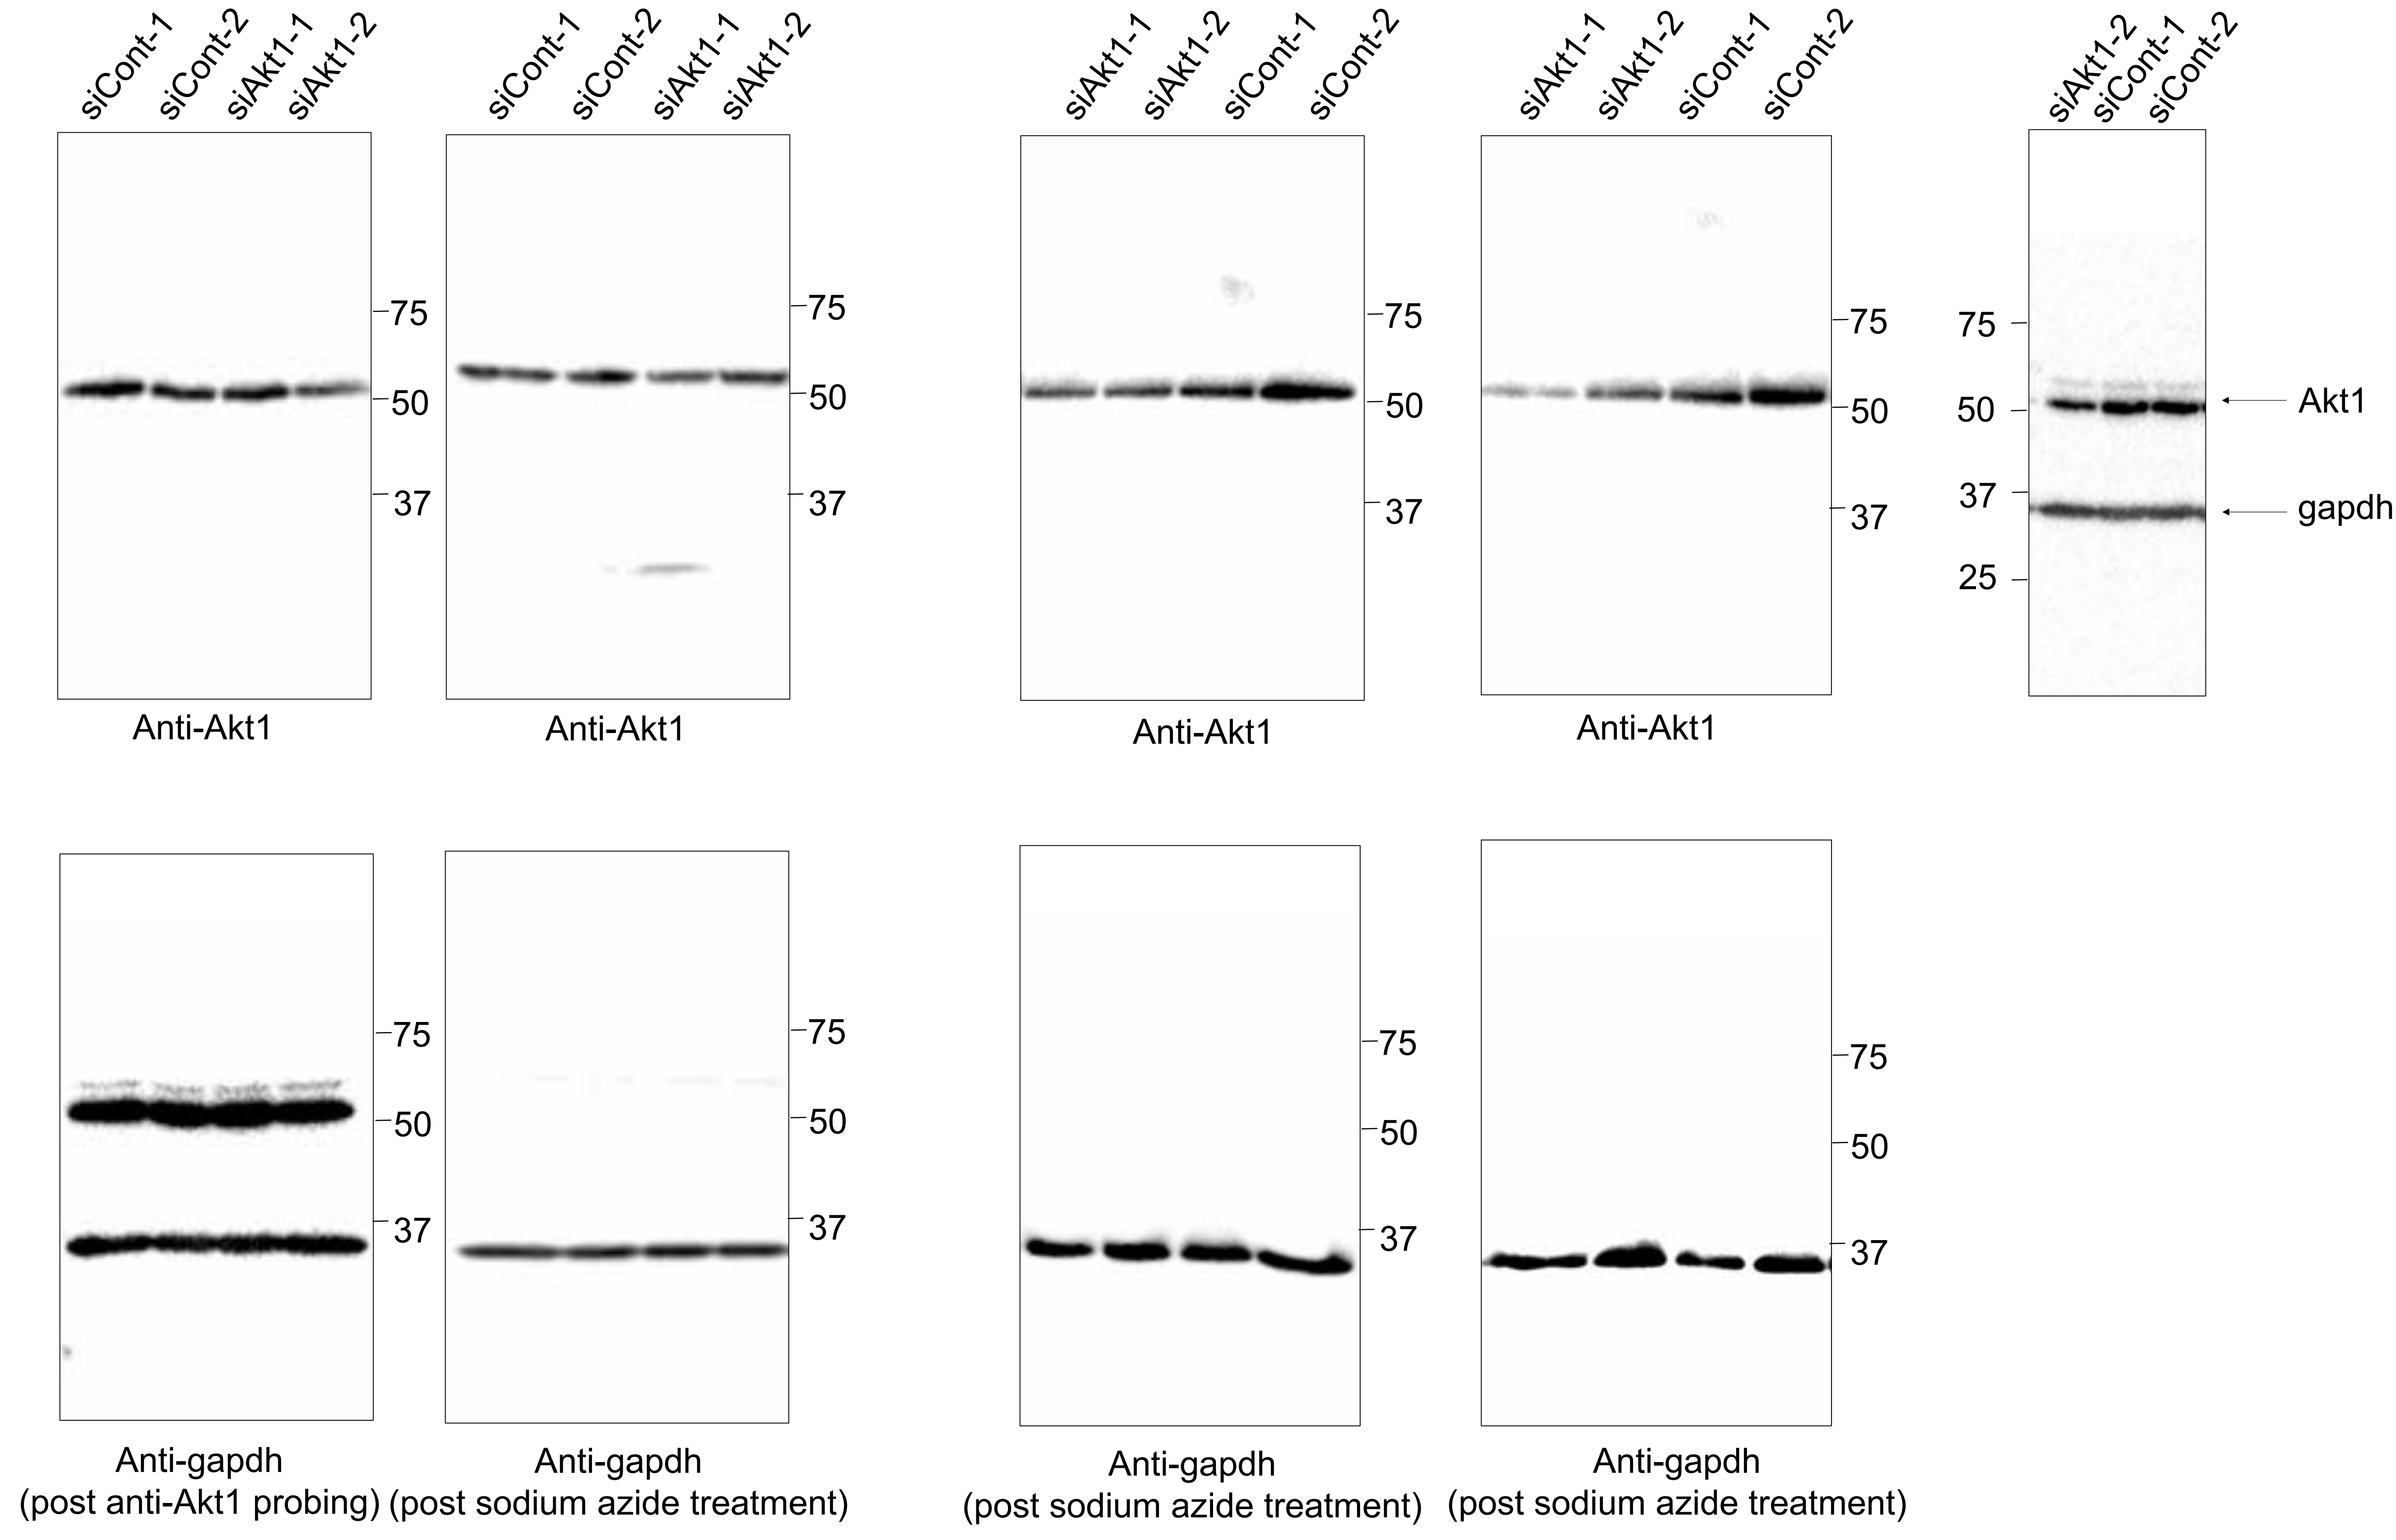

Representative replicates related to data in Supplemental Figure S11 - continued

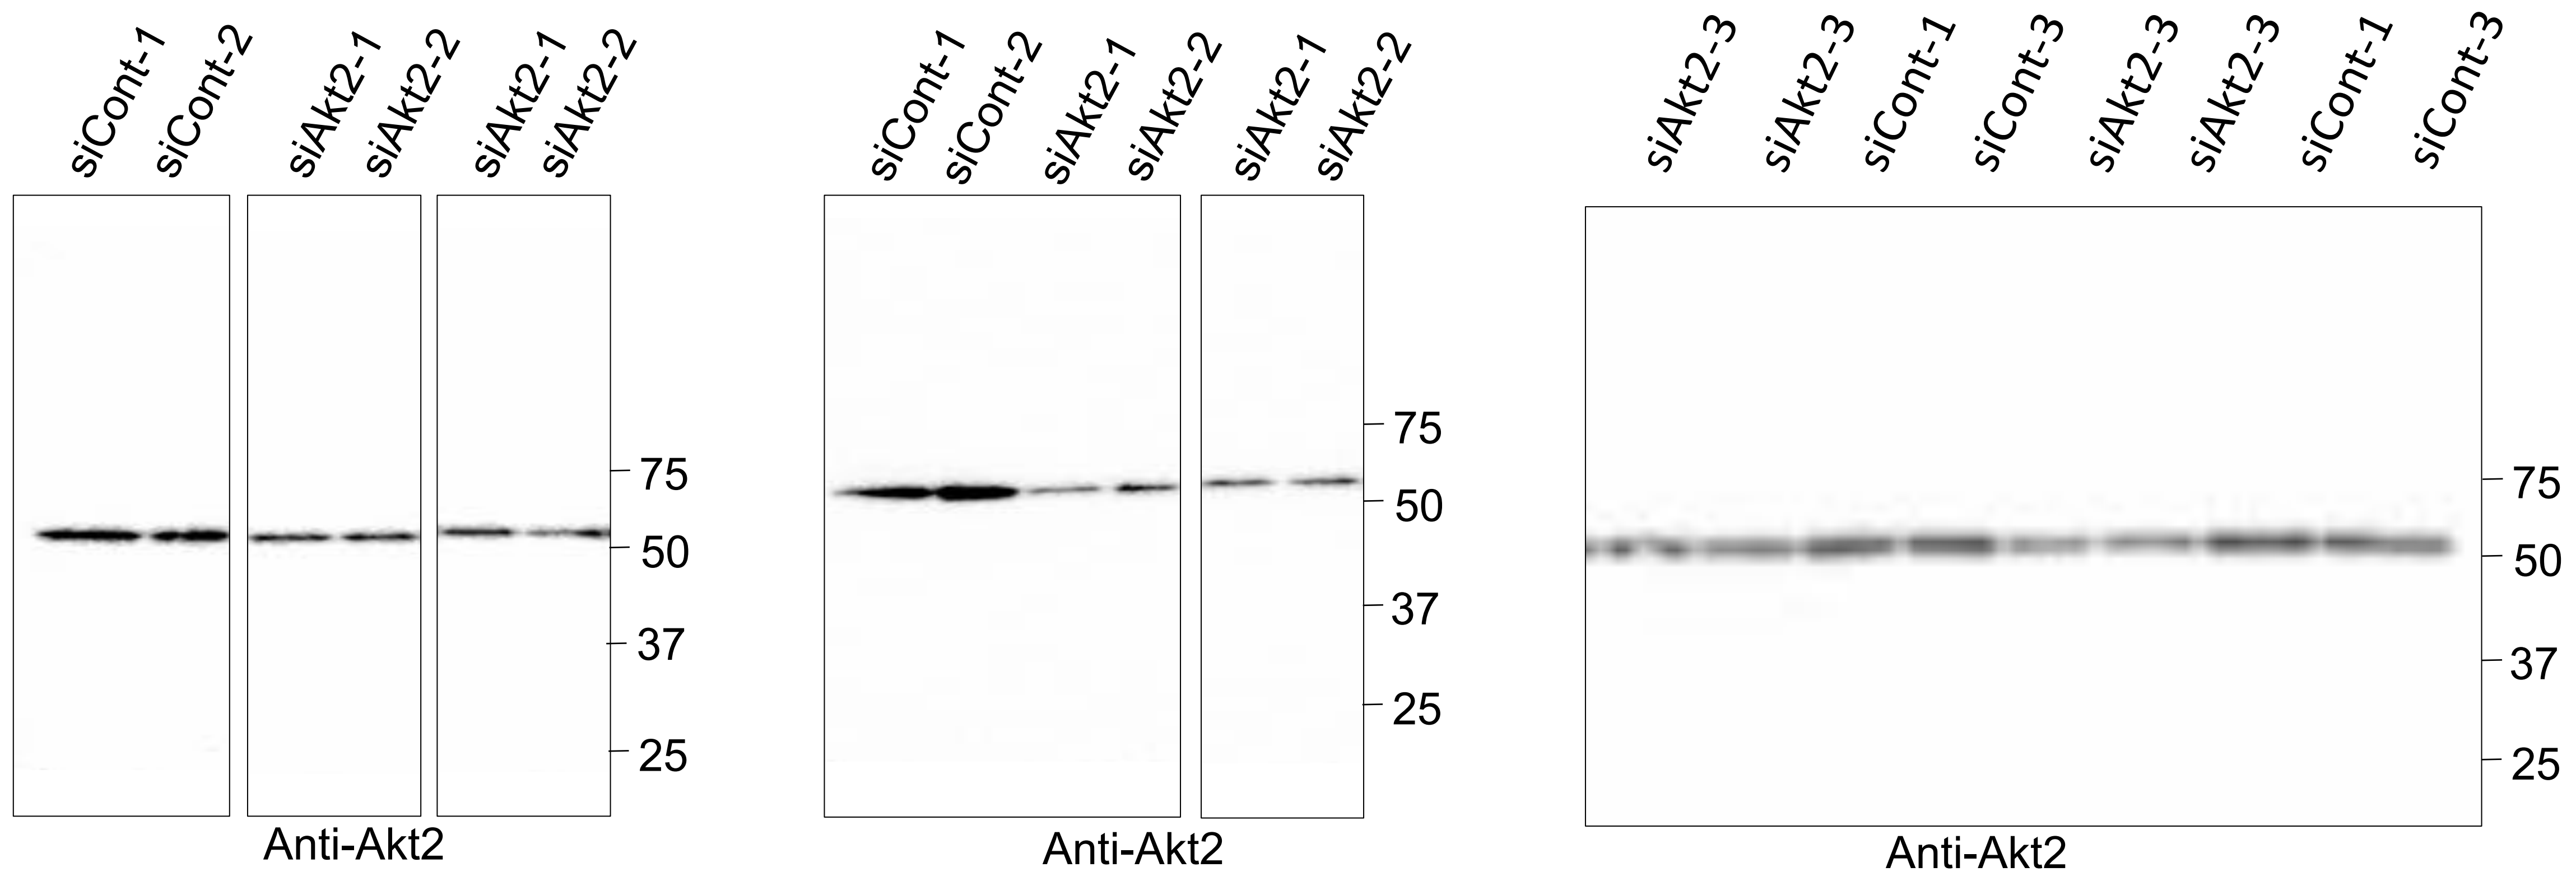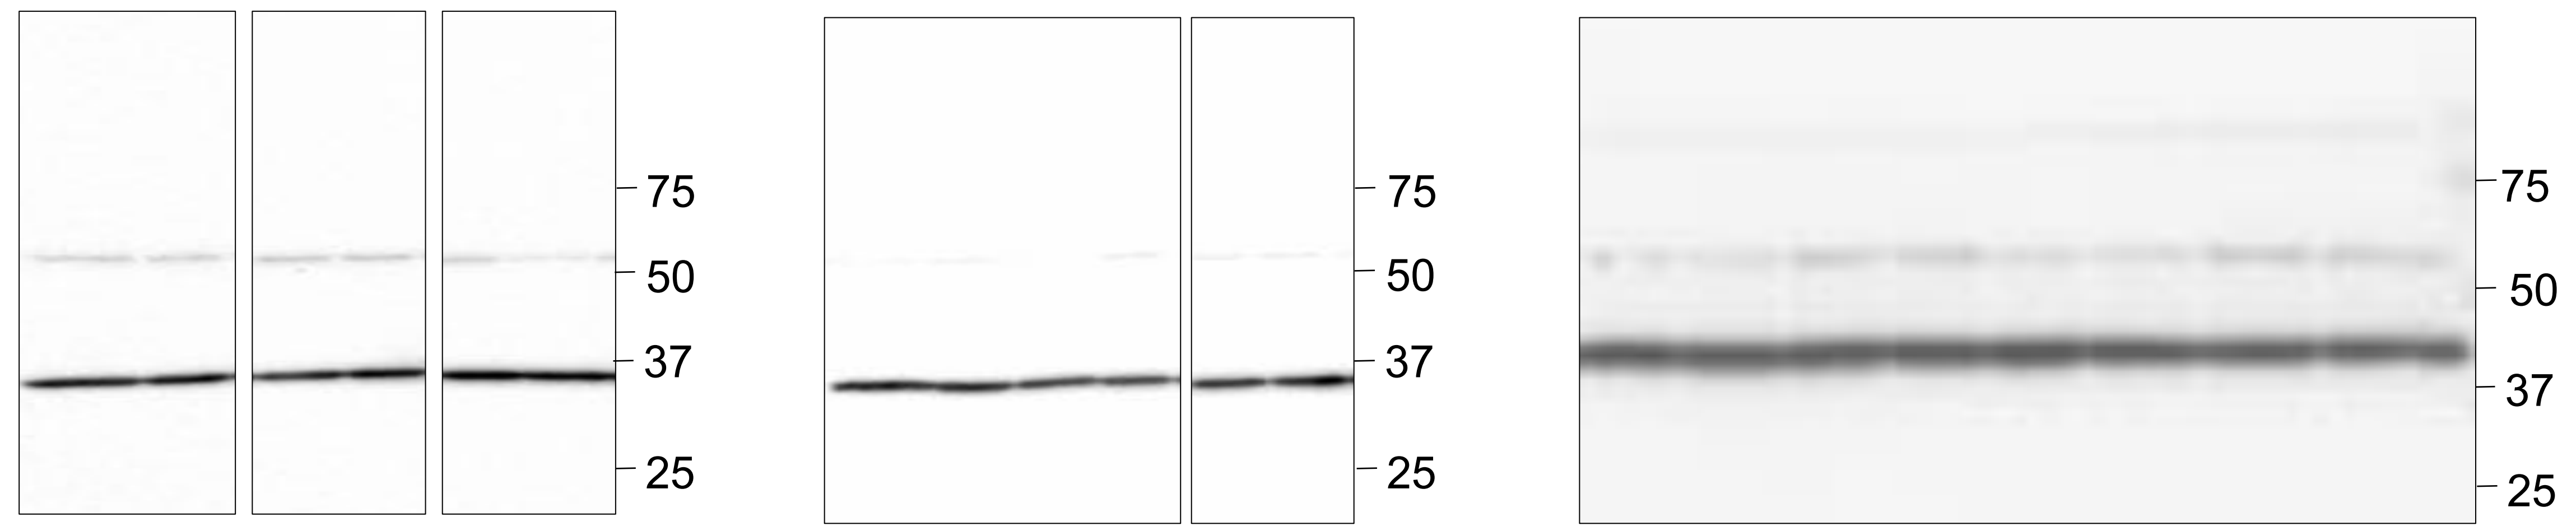

Anti-gapdh (post sodium azide treatment)      Anti-gapdh (post sodium azide treatment)      Anti-actin

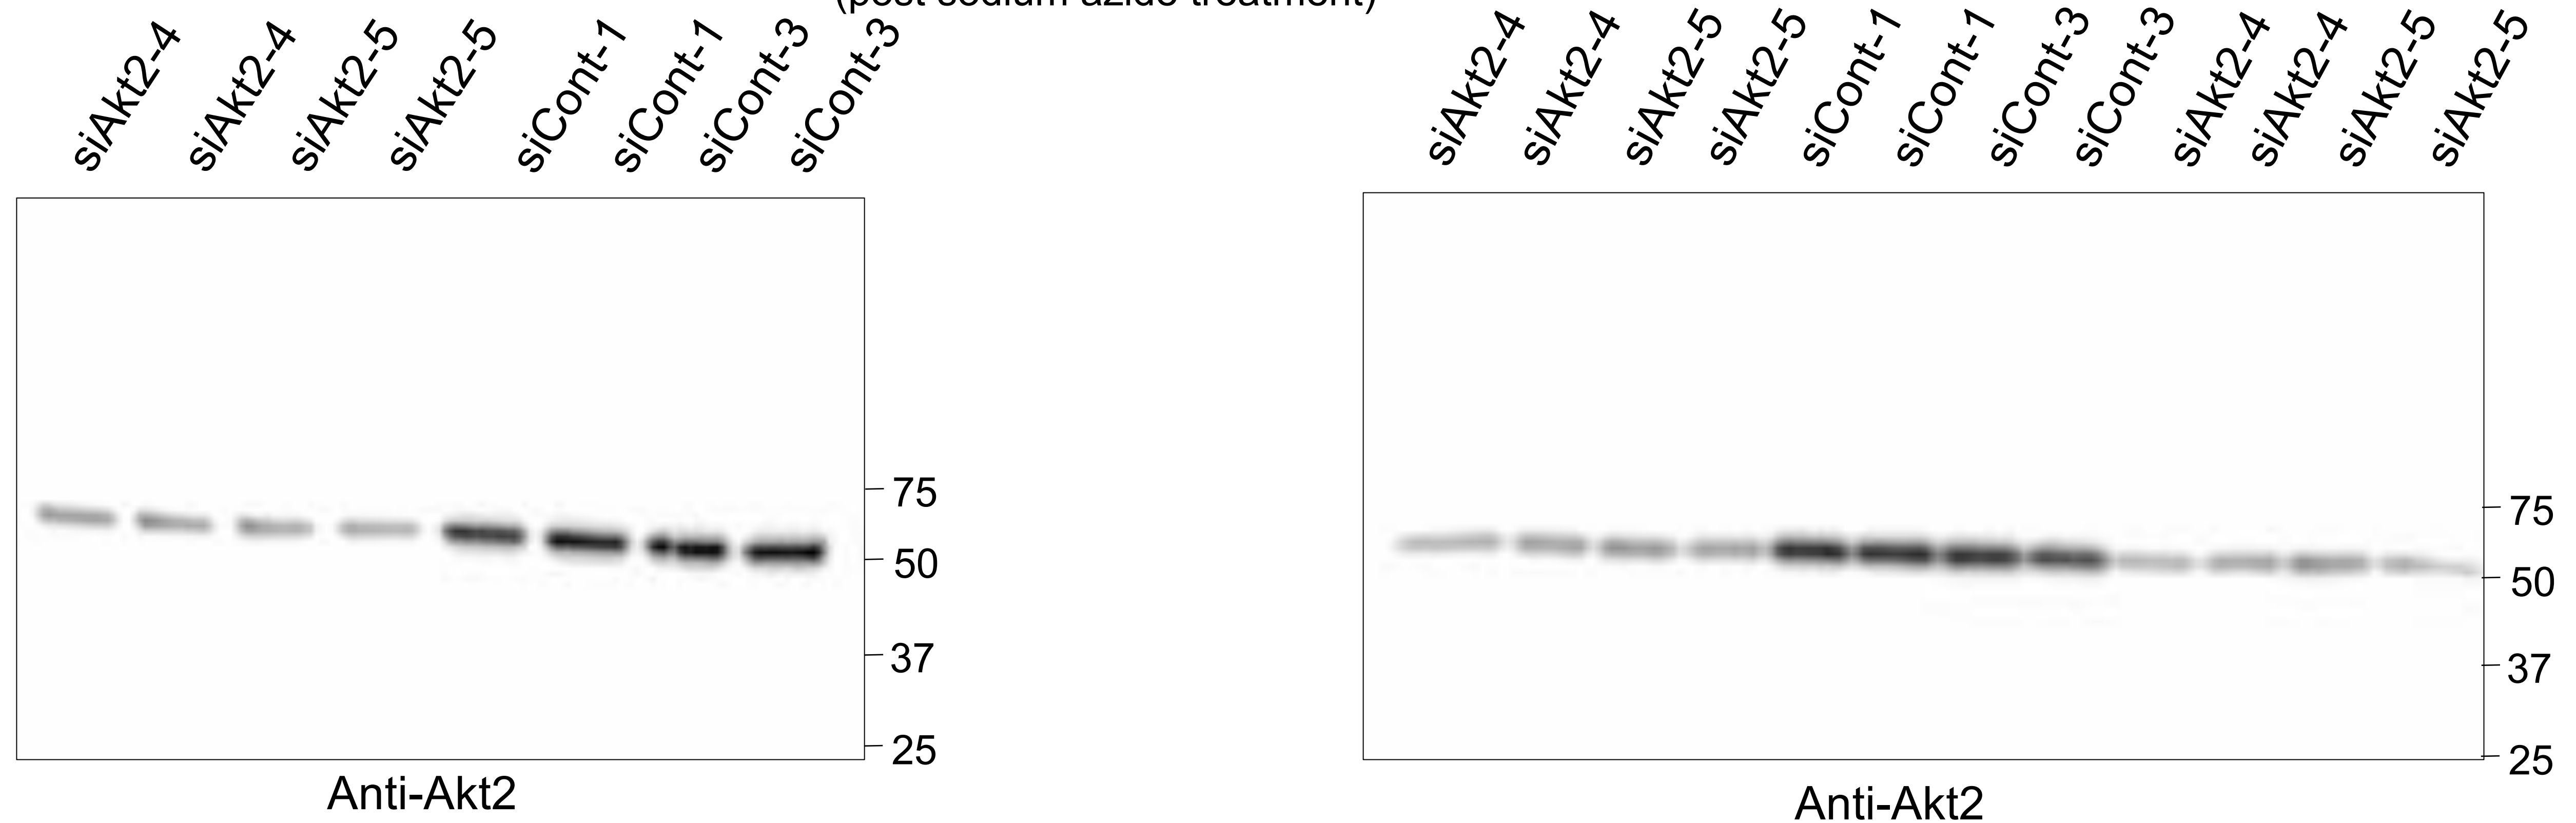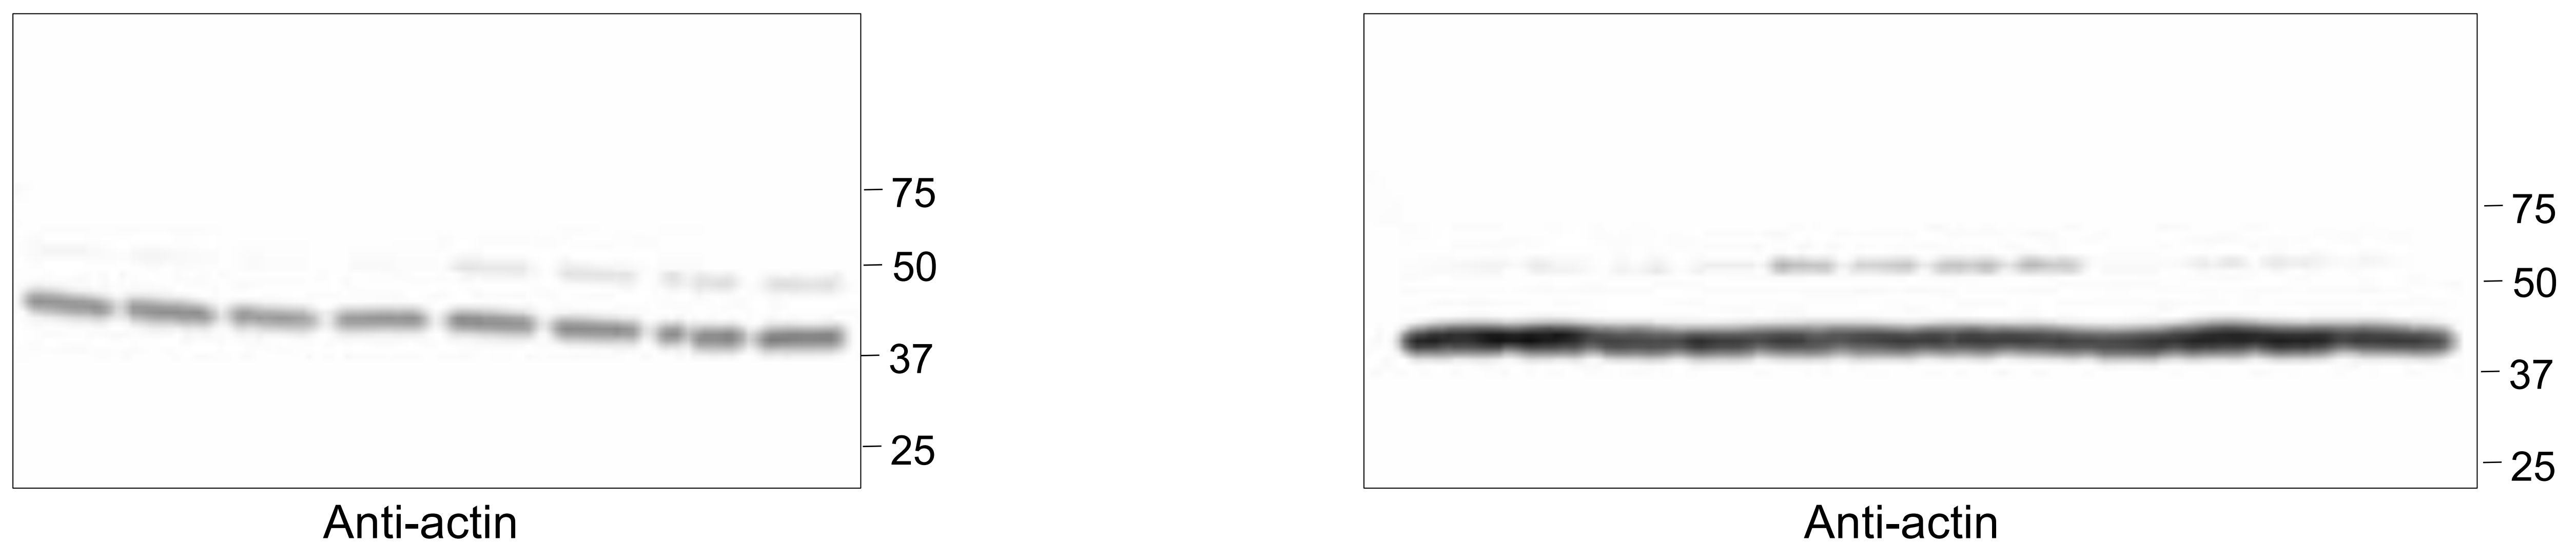



Representative replicates related to data in Supplemental Figure S11 - continued

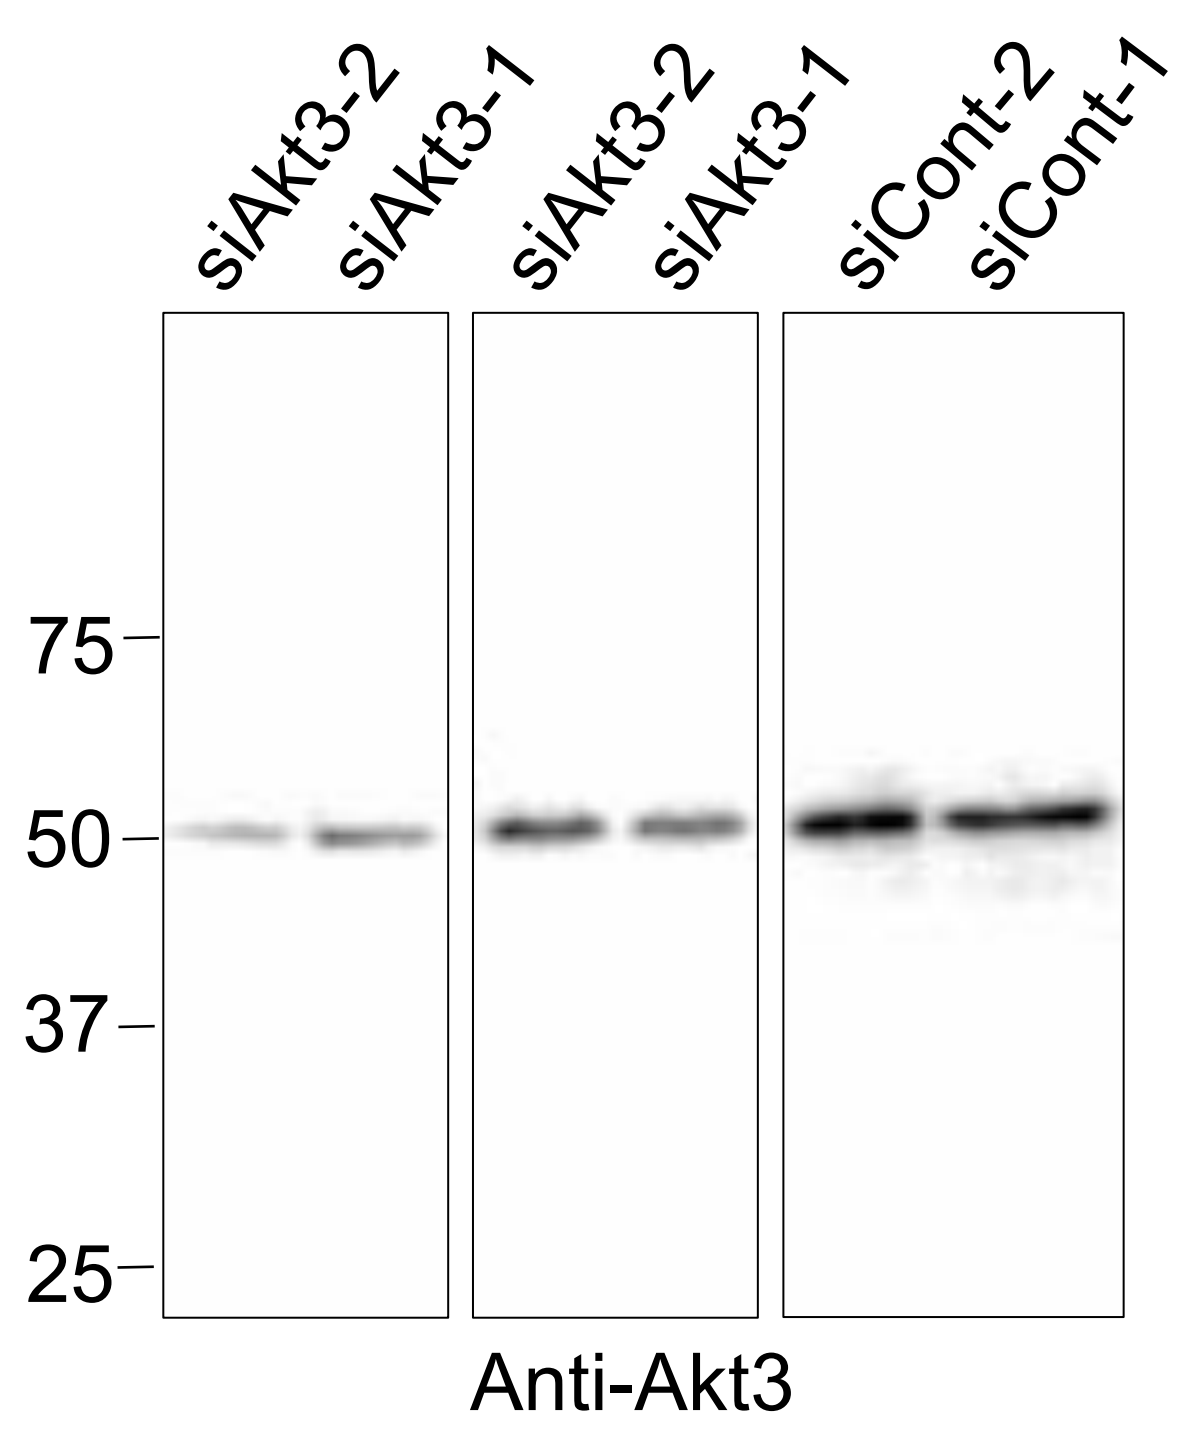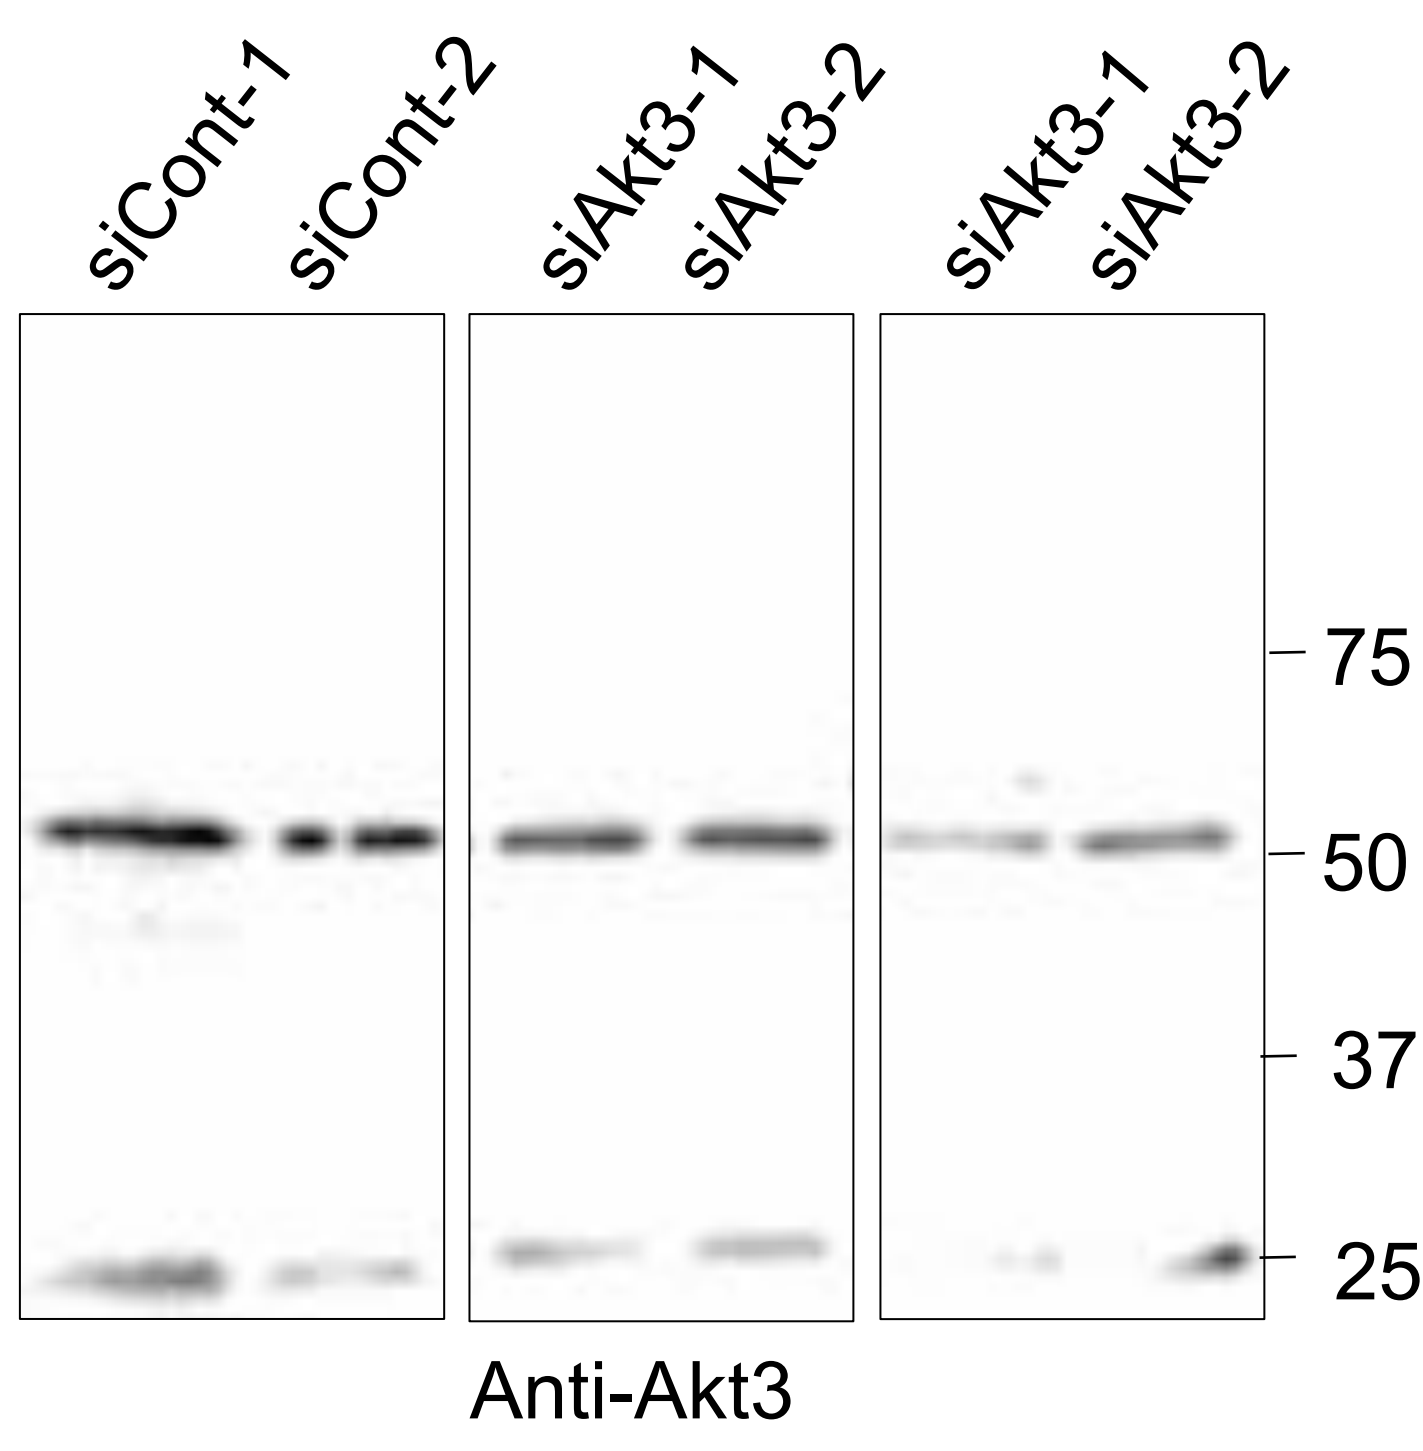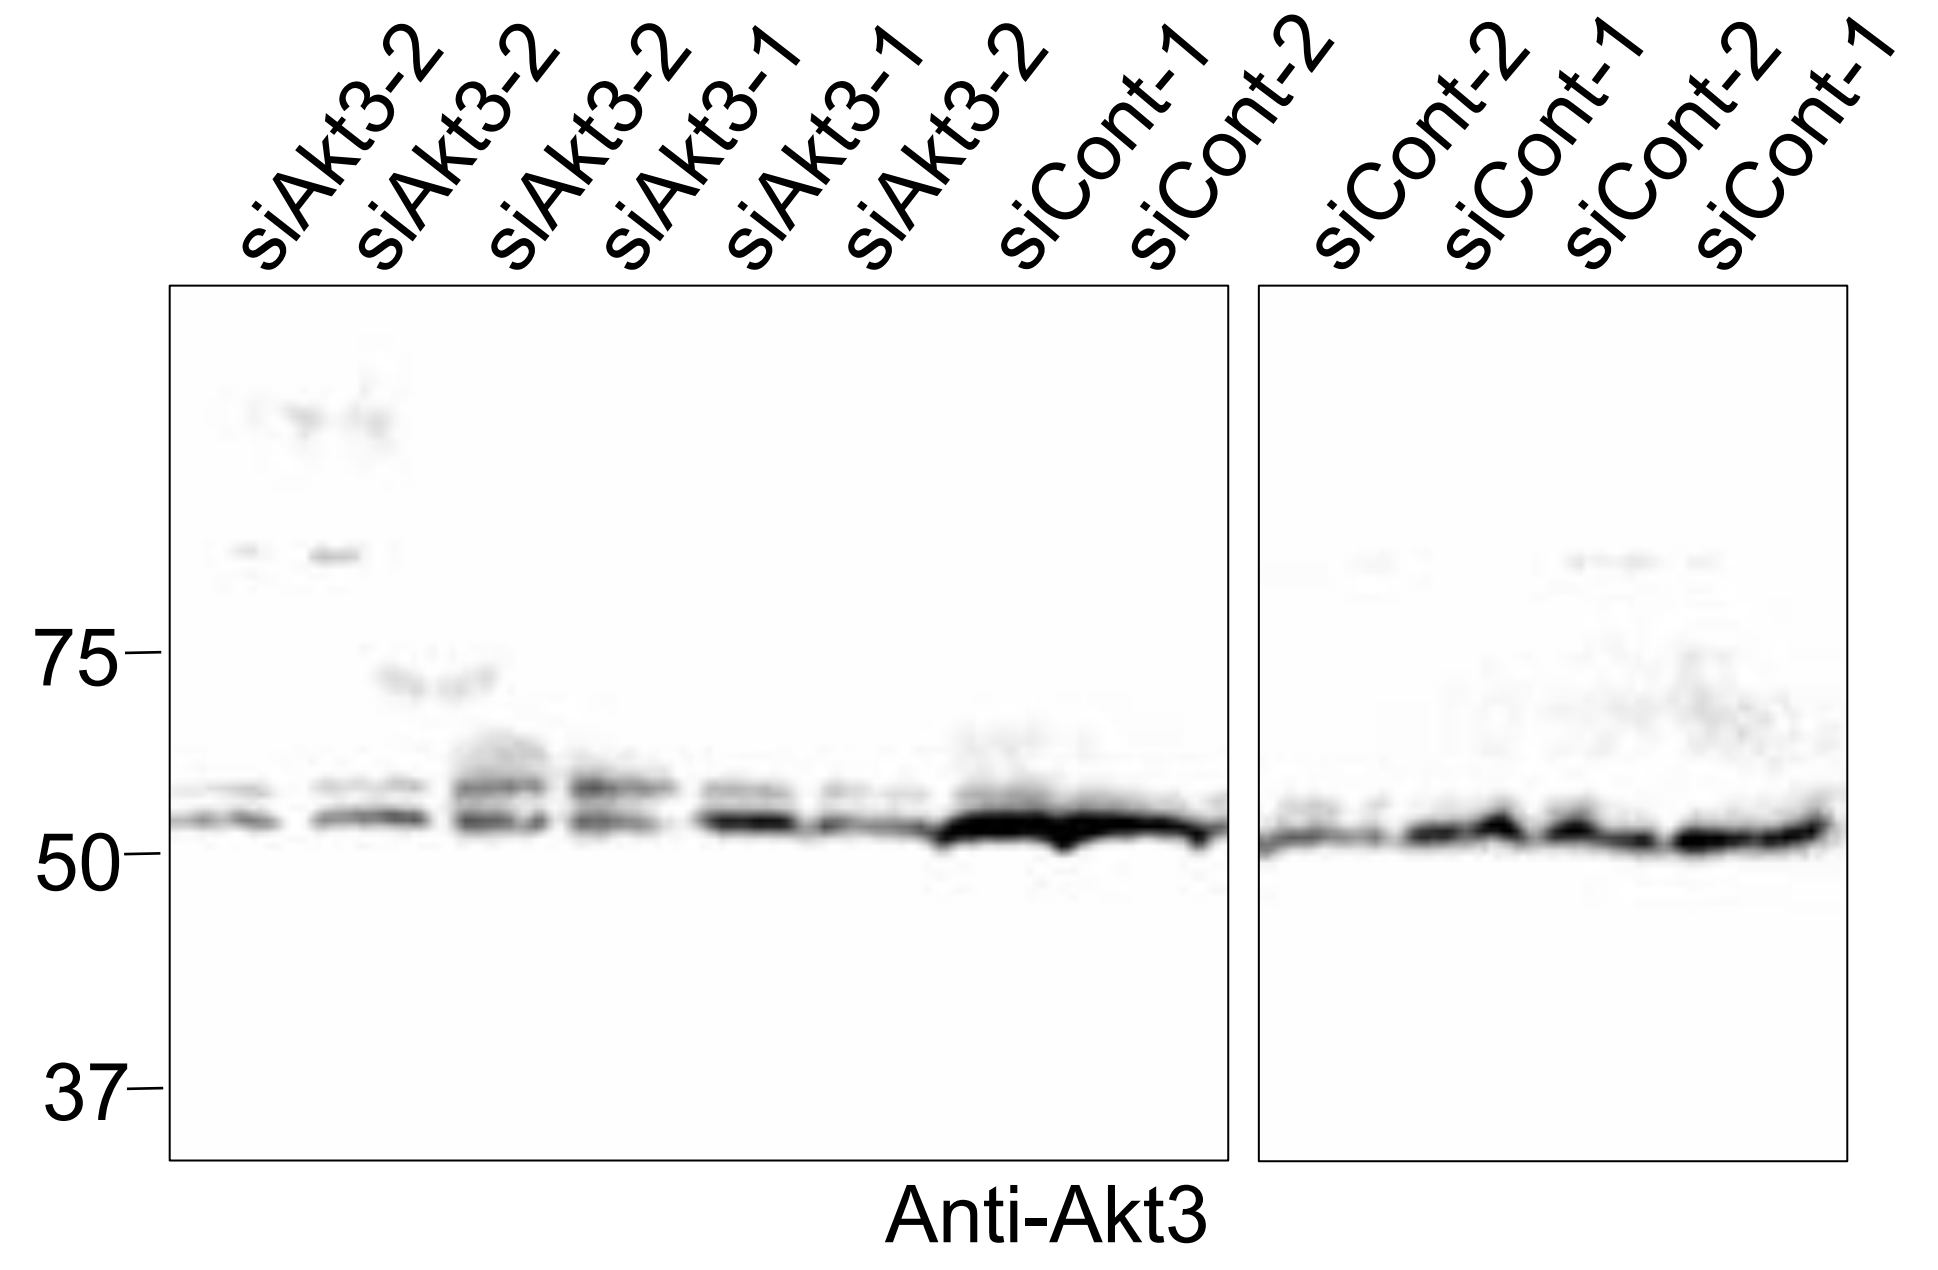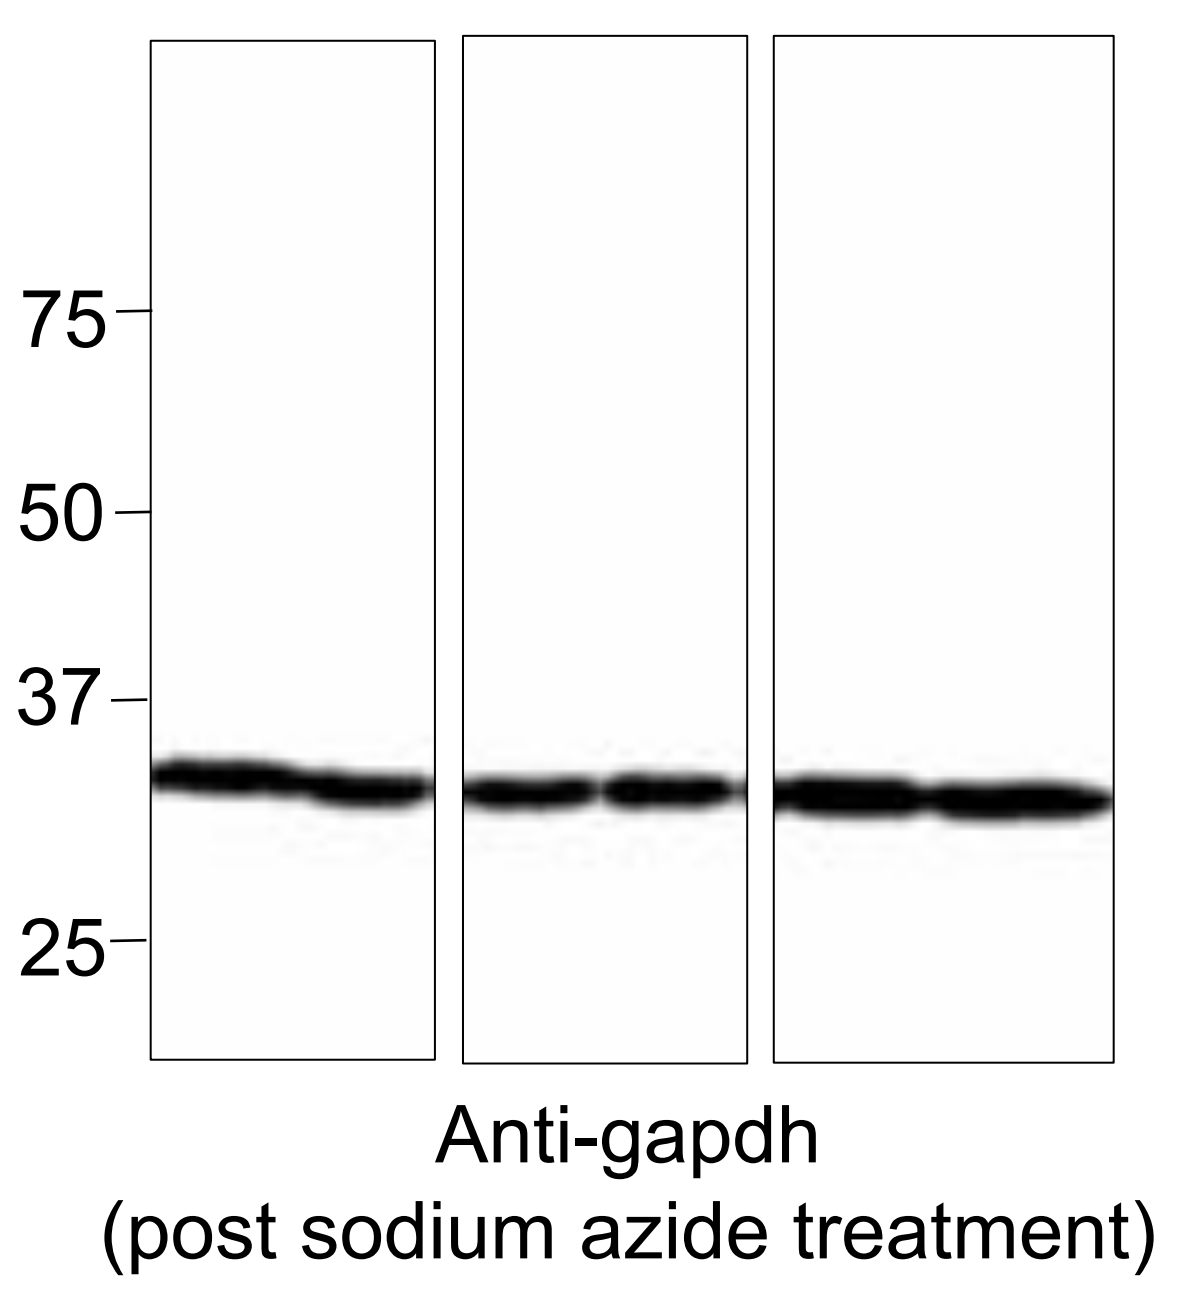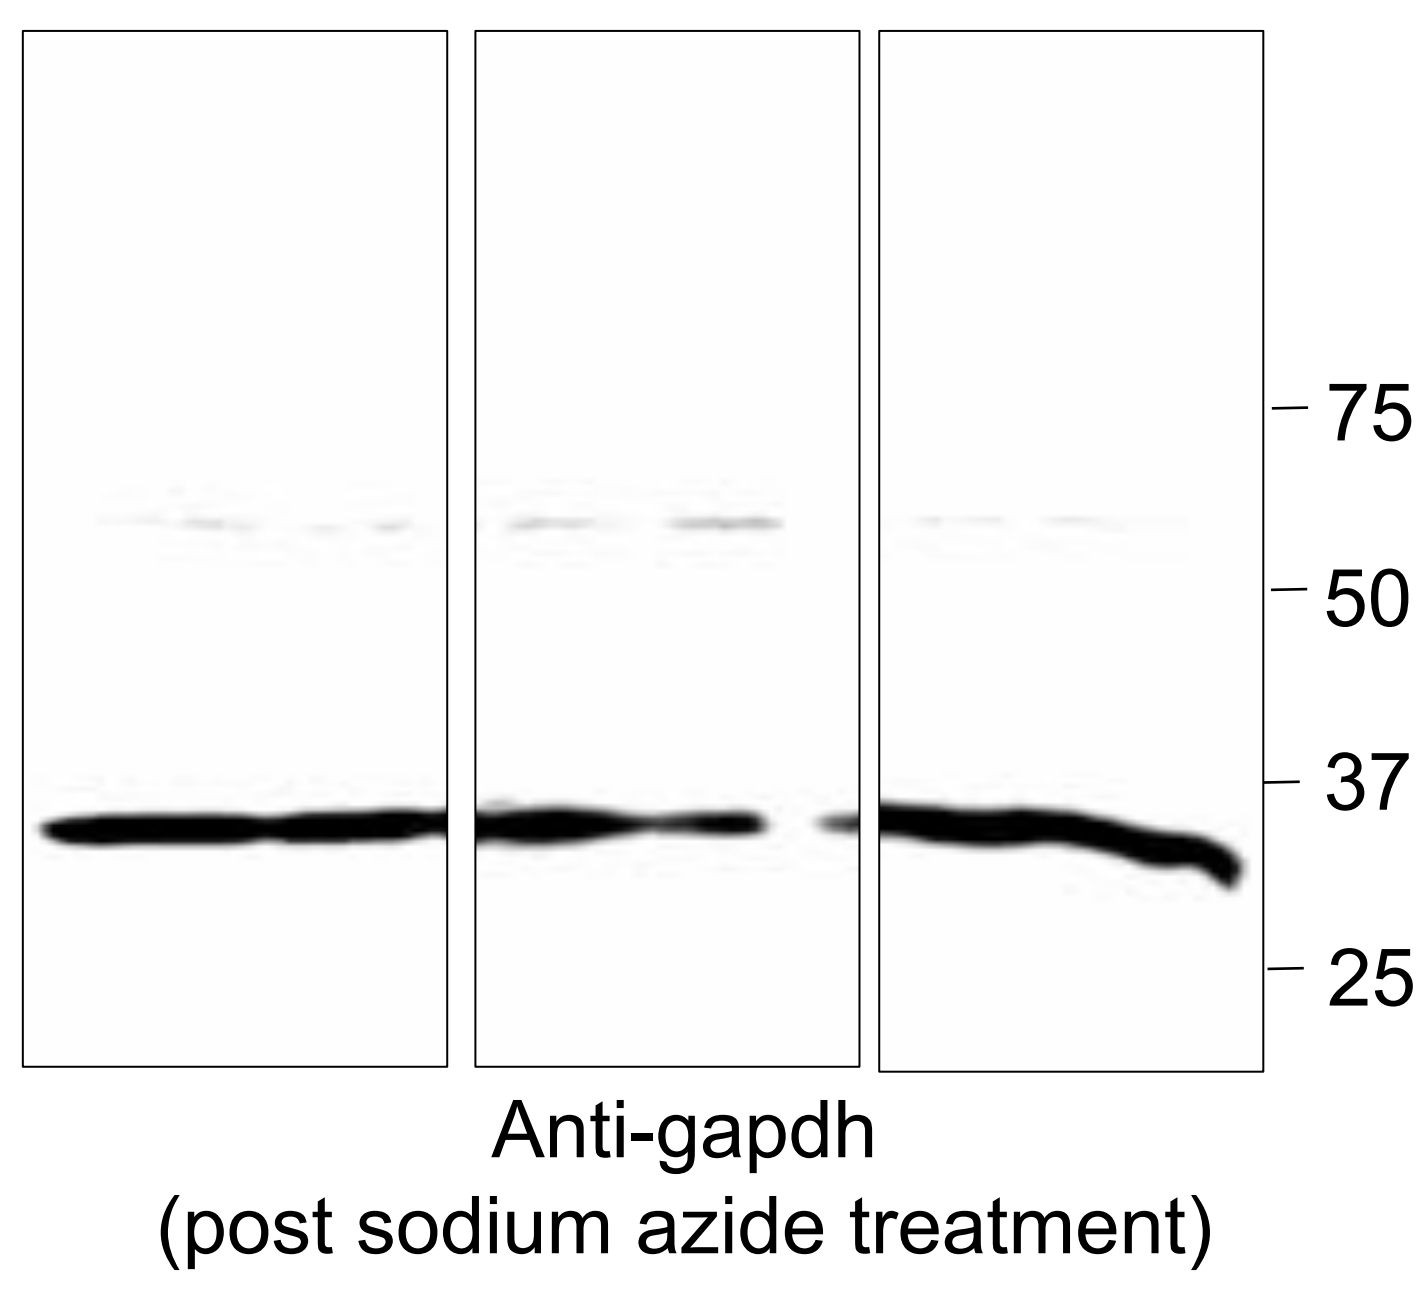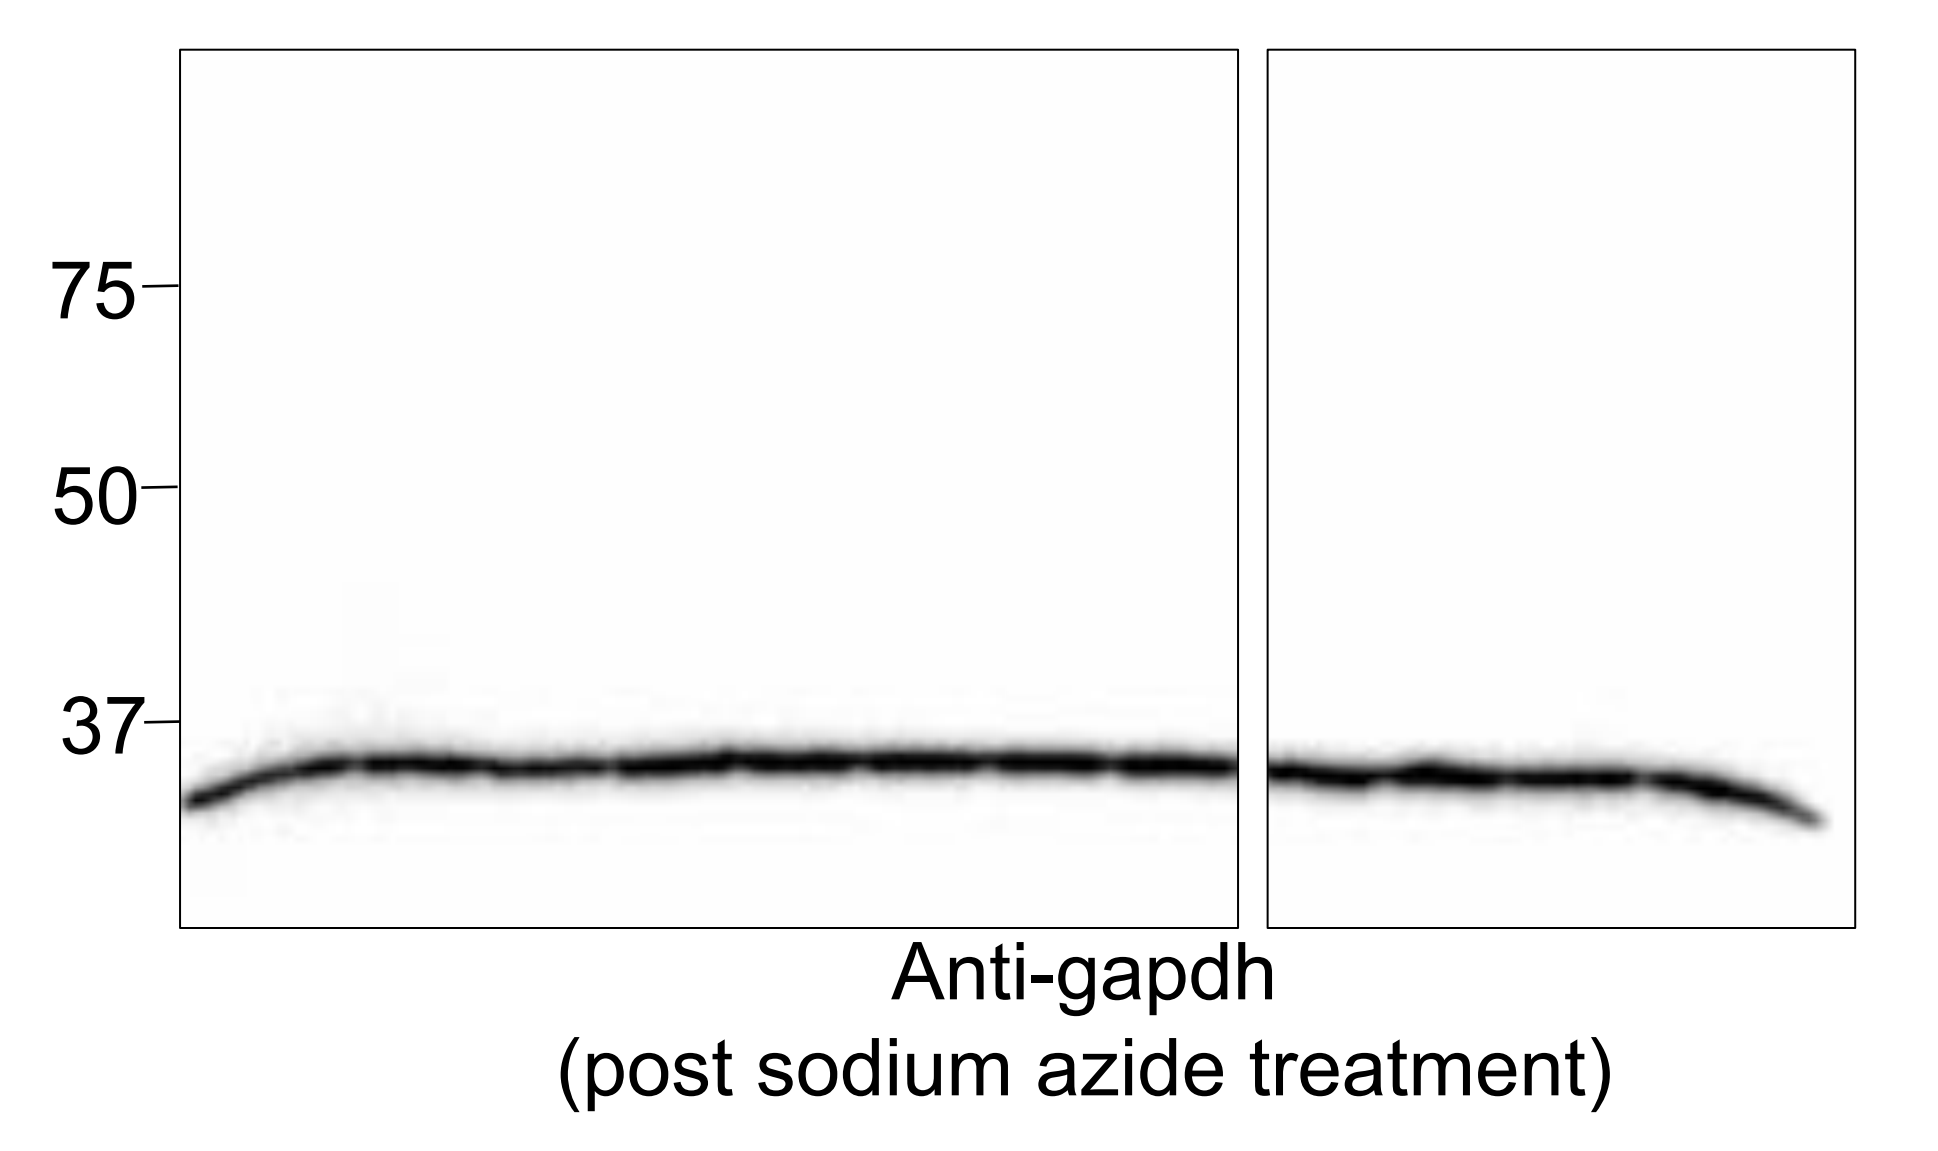

Representative replicates related to data in Supplemental Figure S16

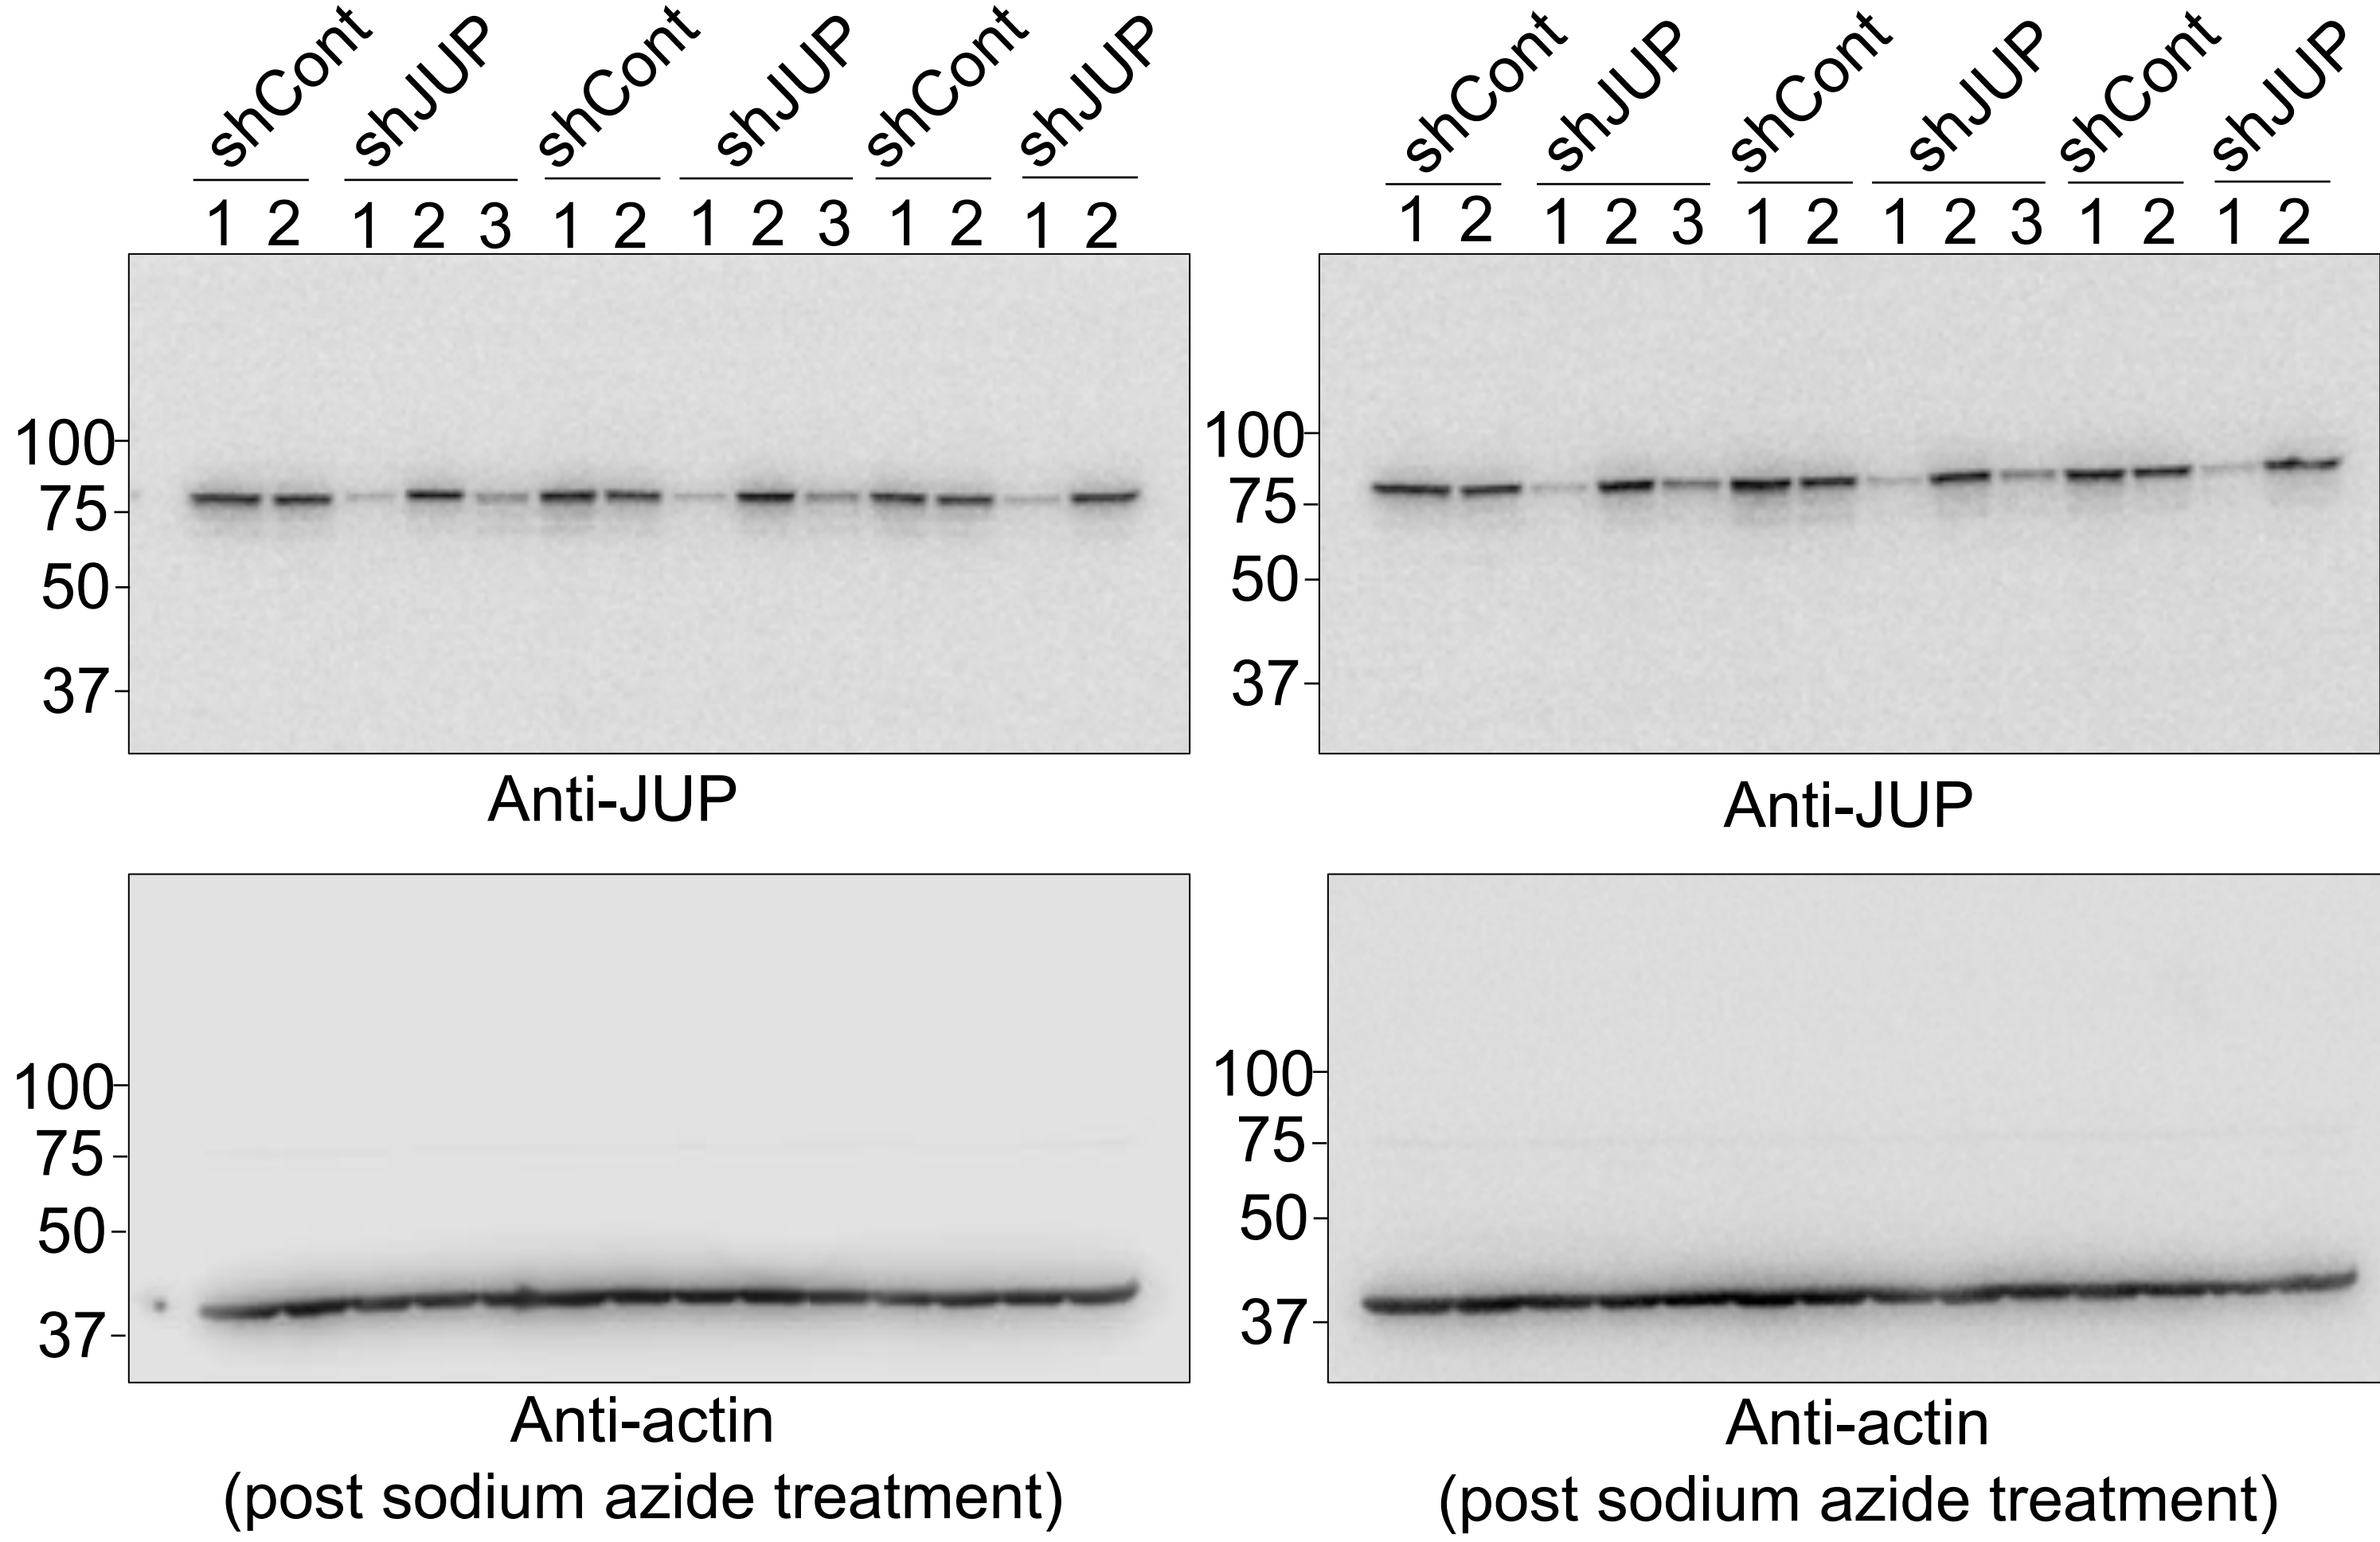

Representative replicates related to data in Supplemental Figure S16 - continued

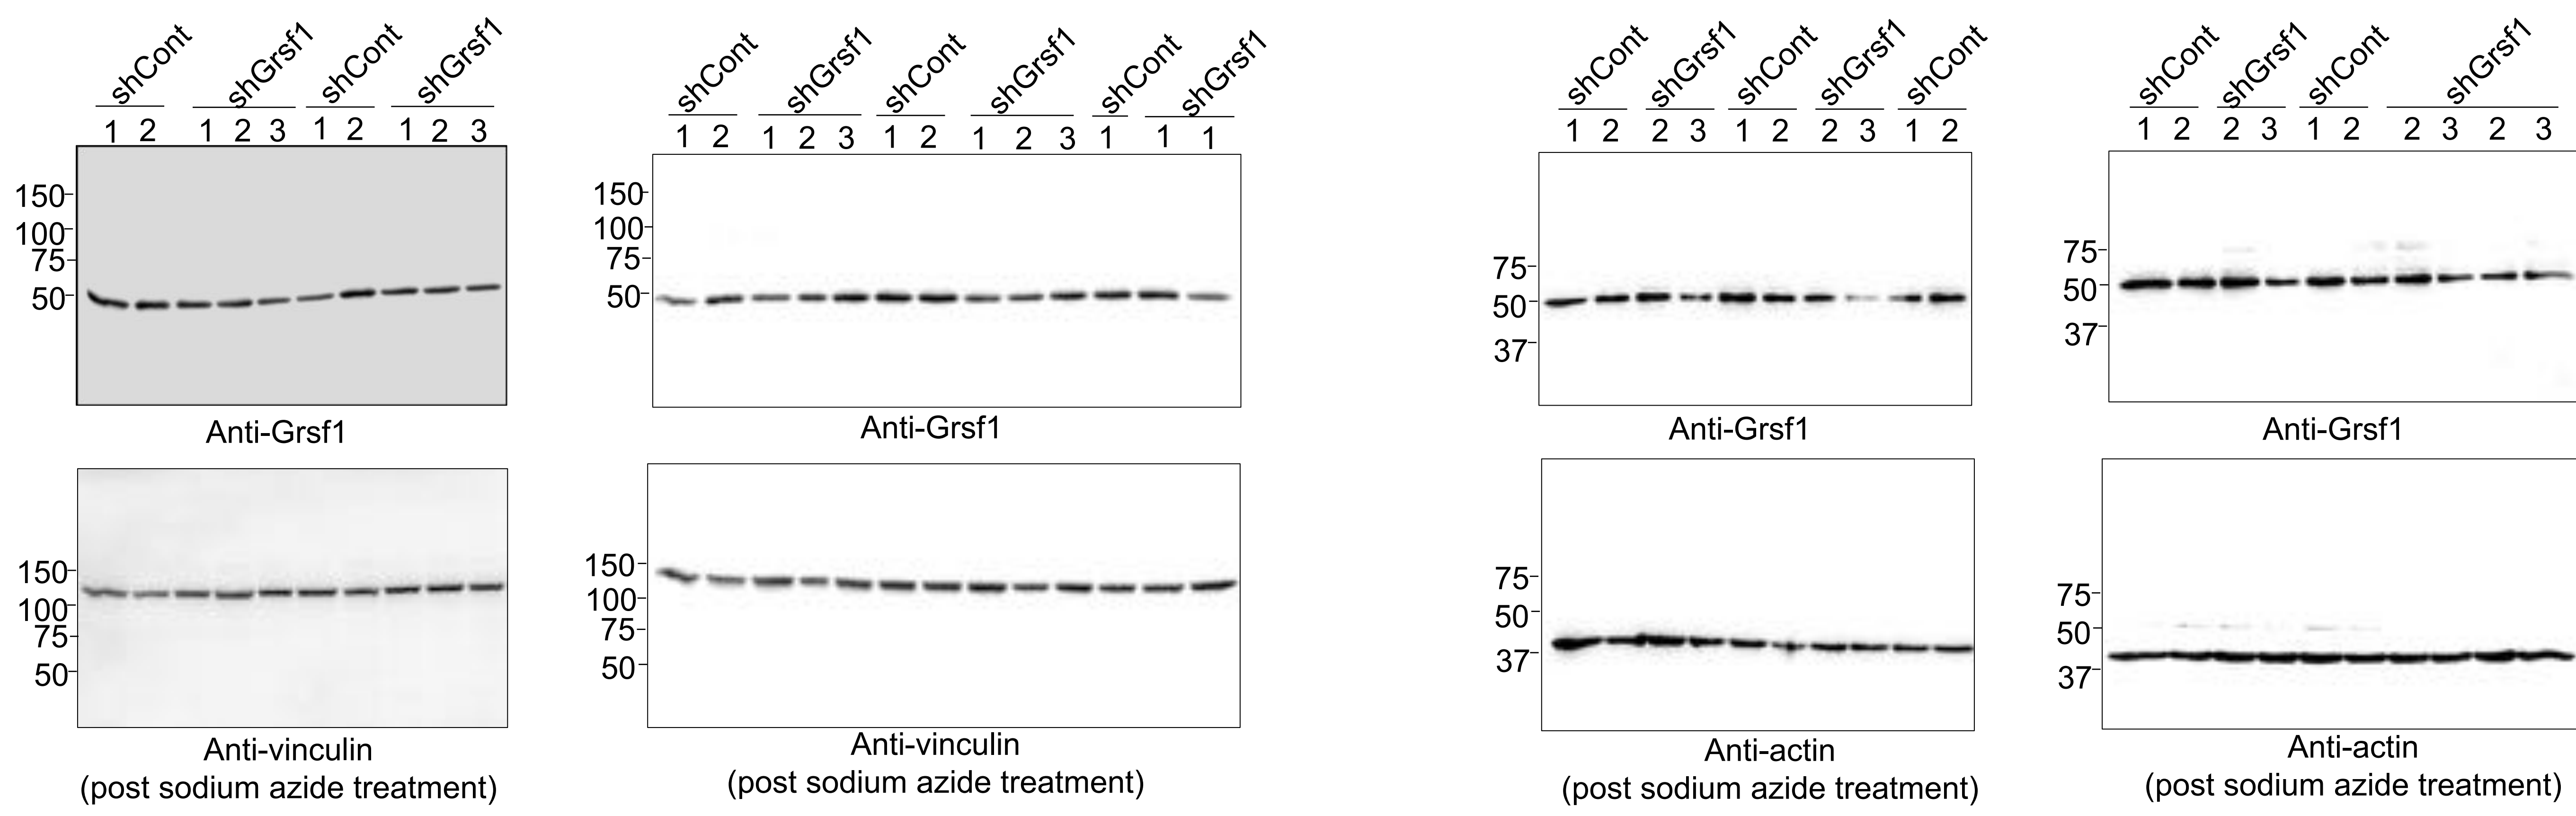

Actin protein was inefficiently transferred in these two blots, therefore, vinculin was used as loading control

**Representative replicates related to data in Main Figure 5**

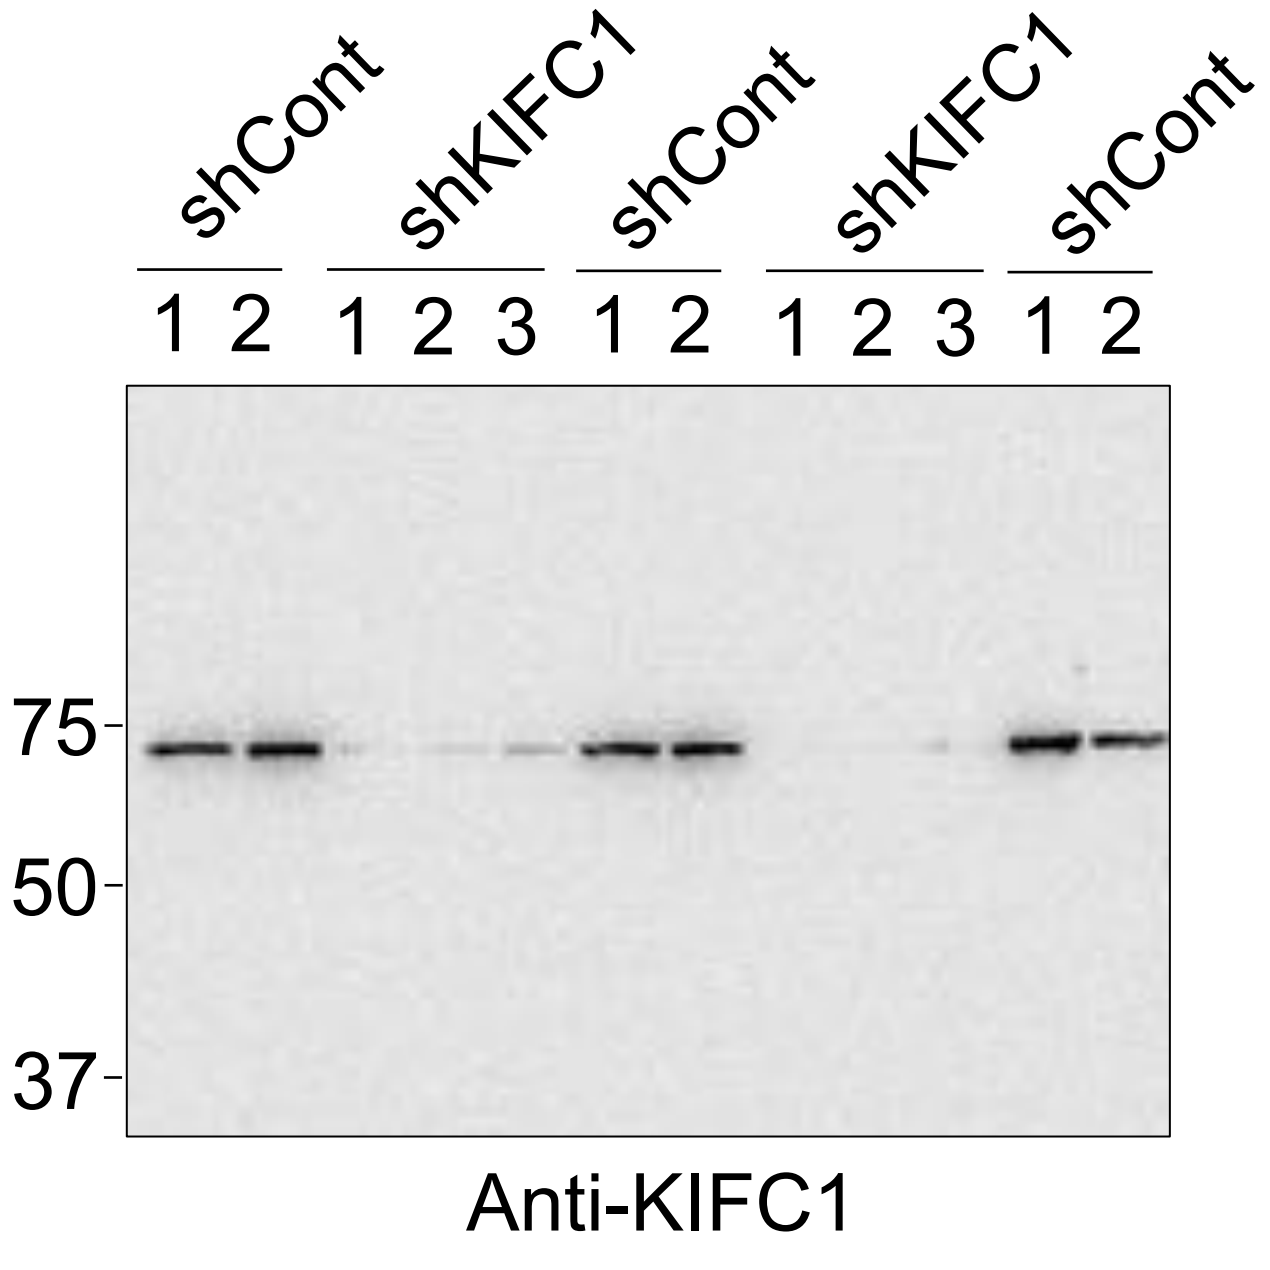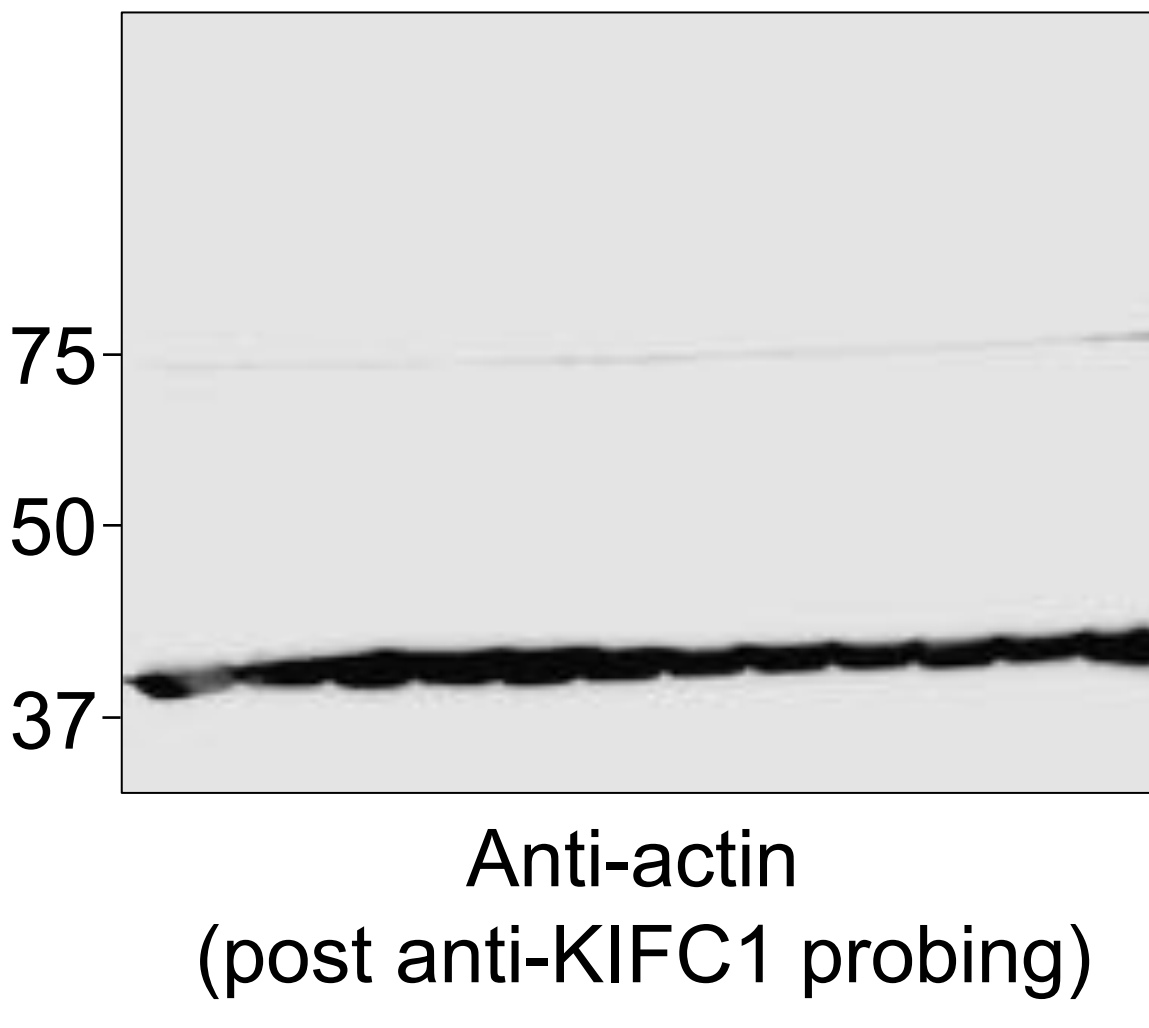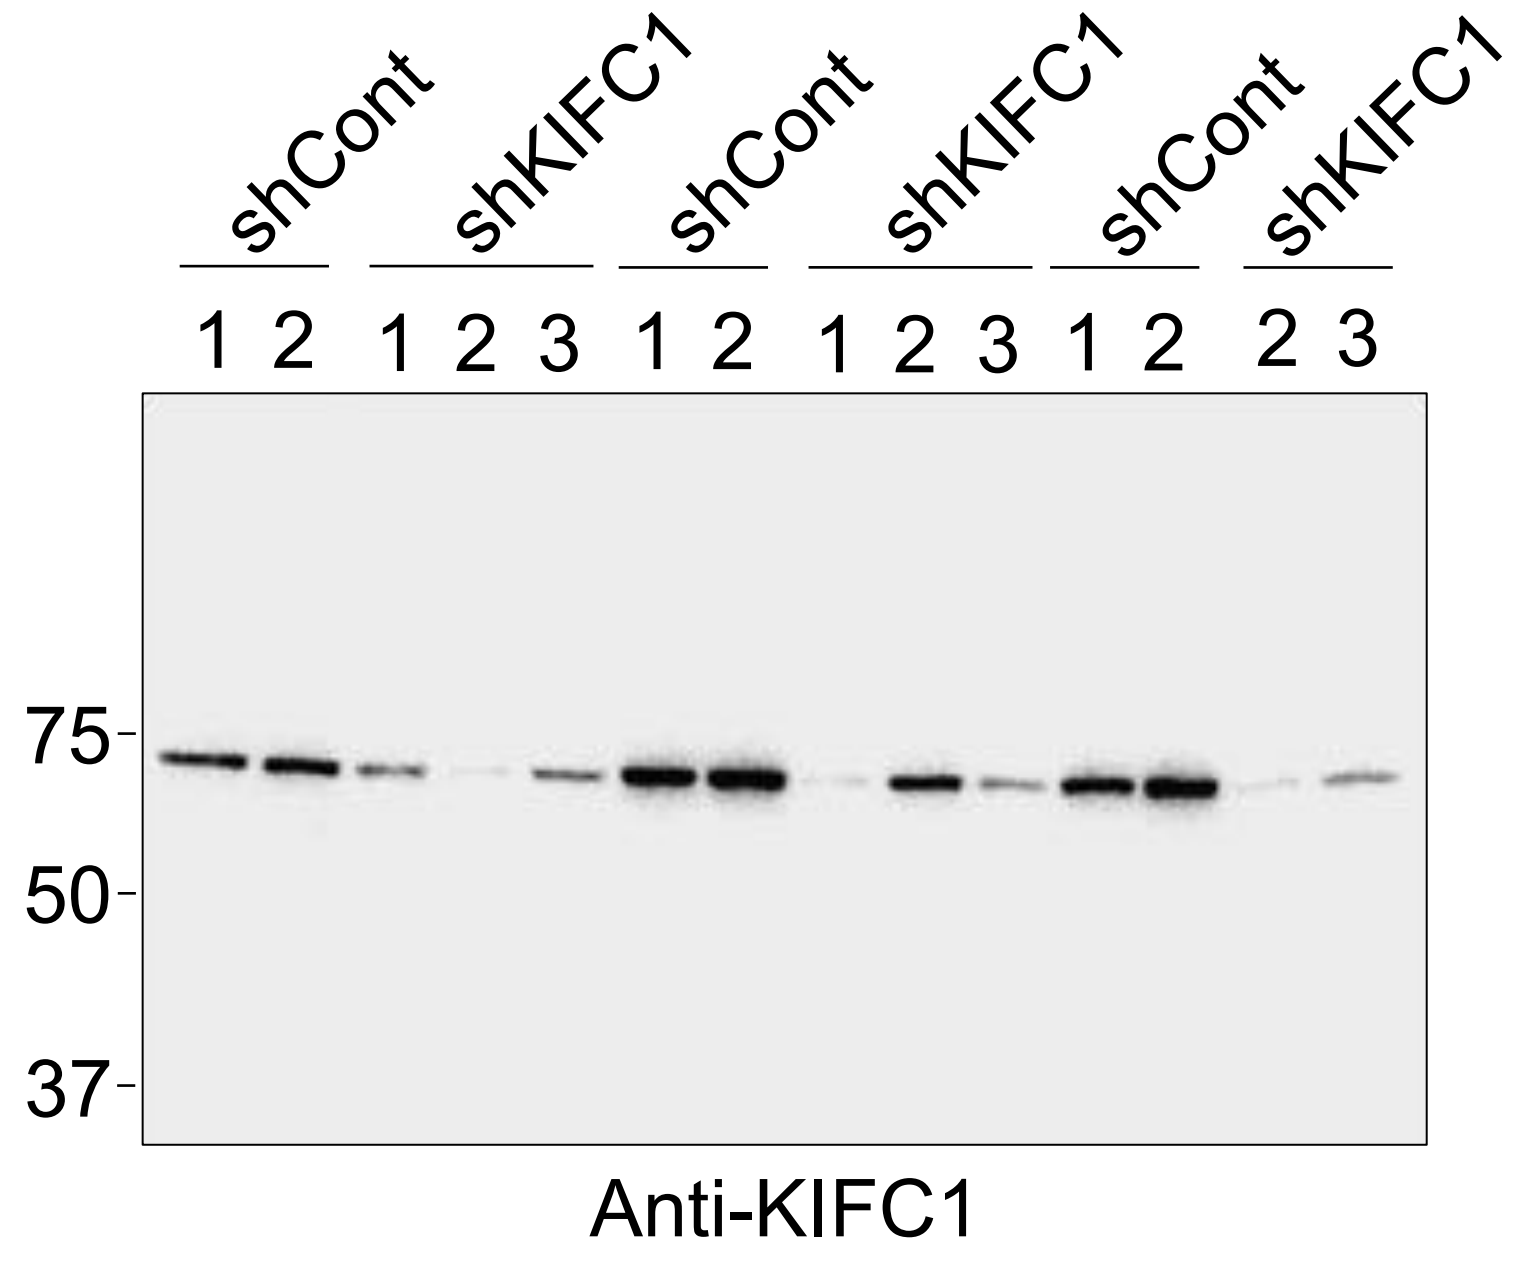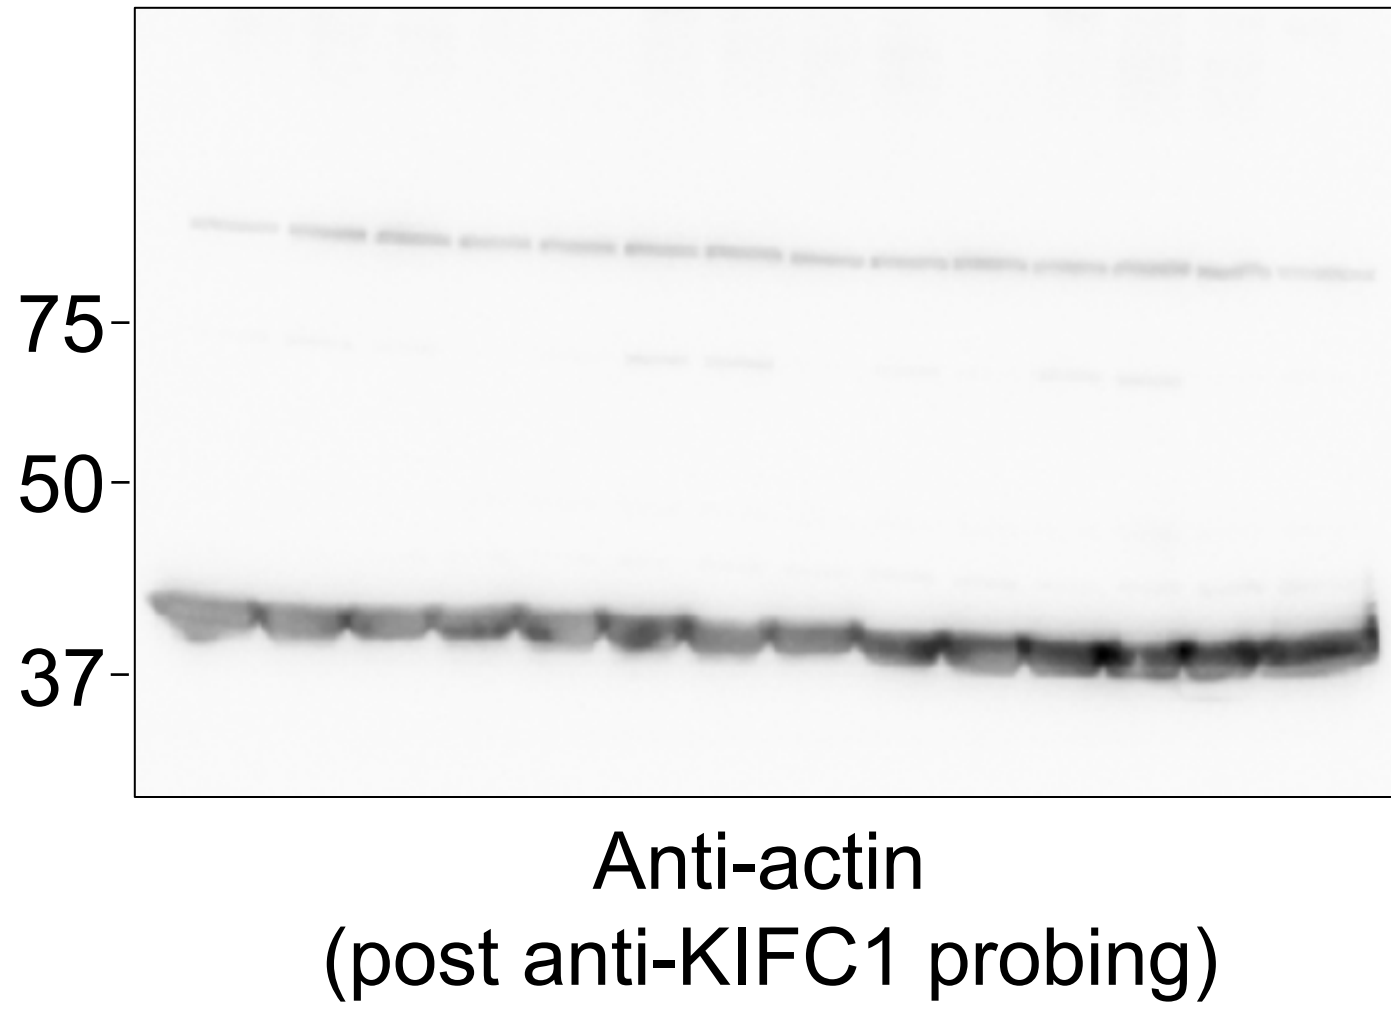

Log-plot of cytotoxic plots in Figure 4

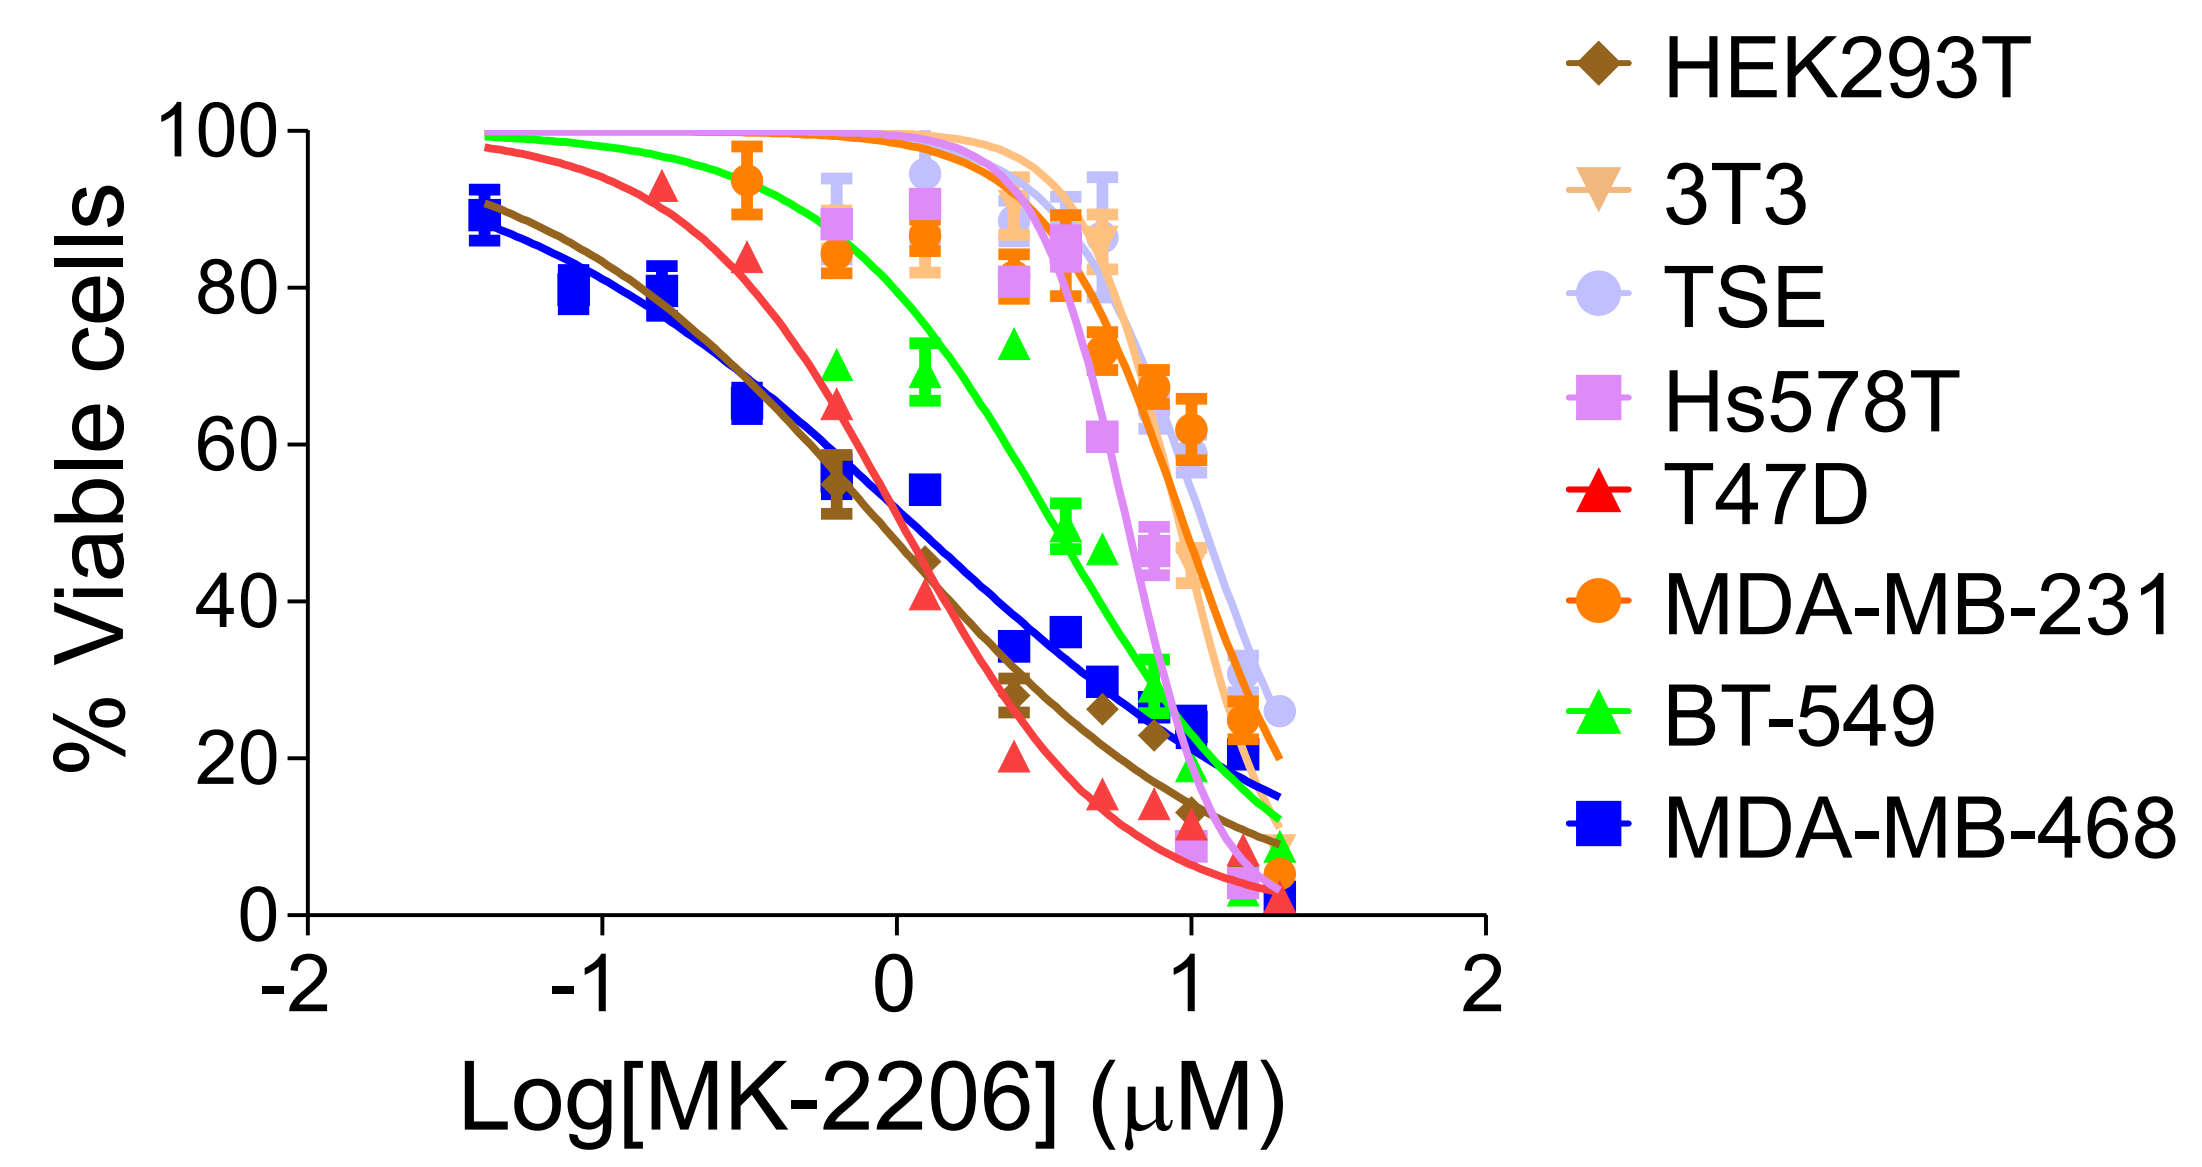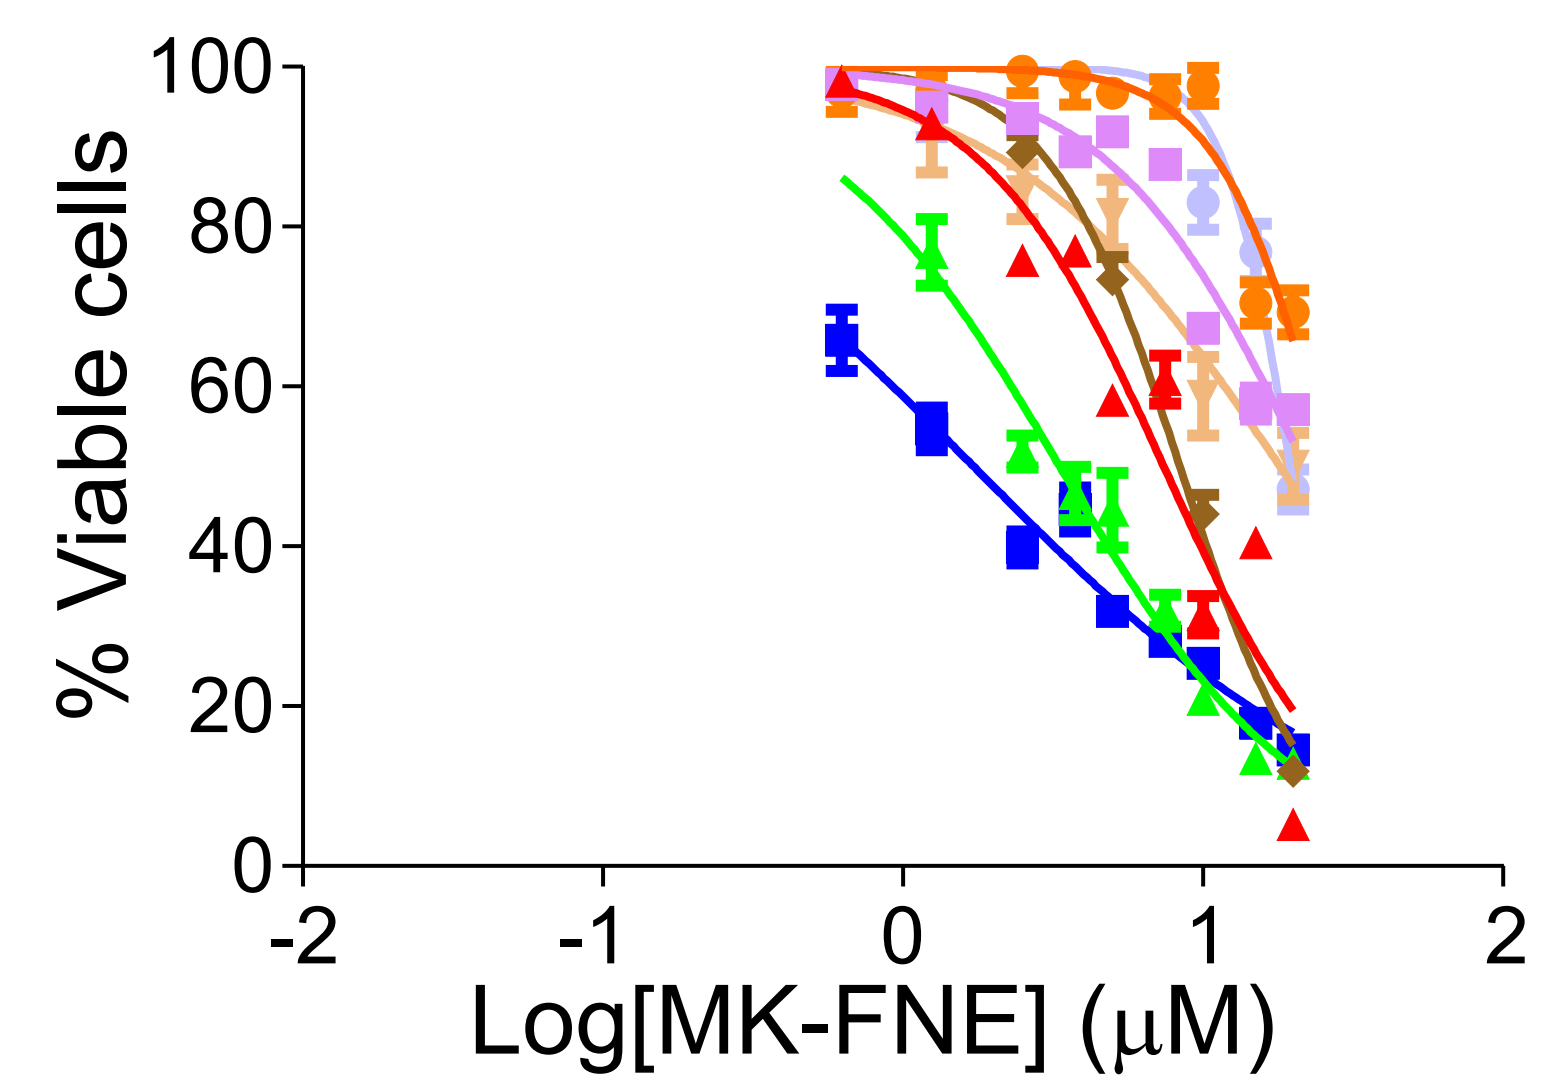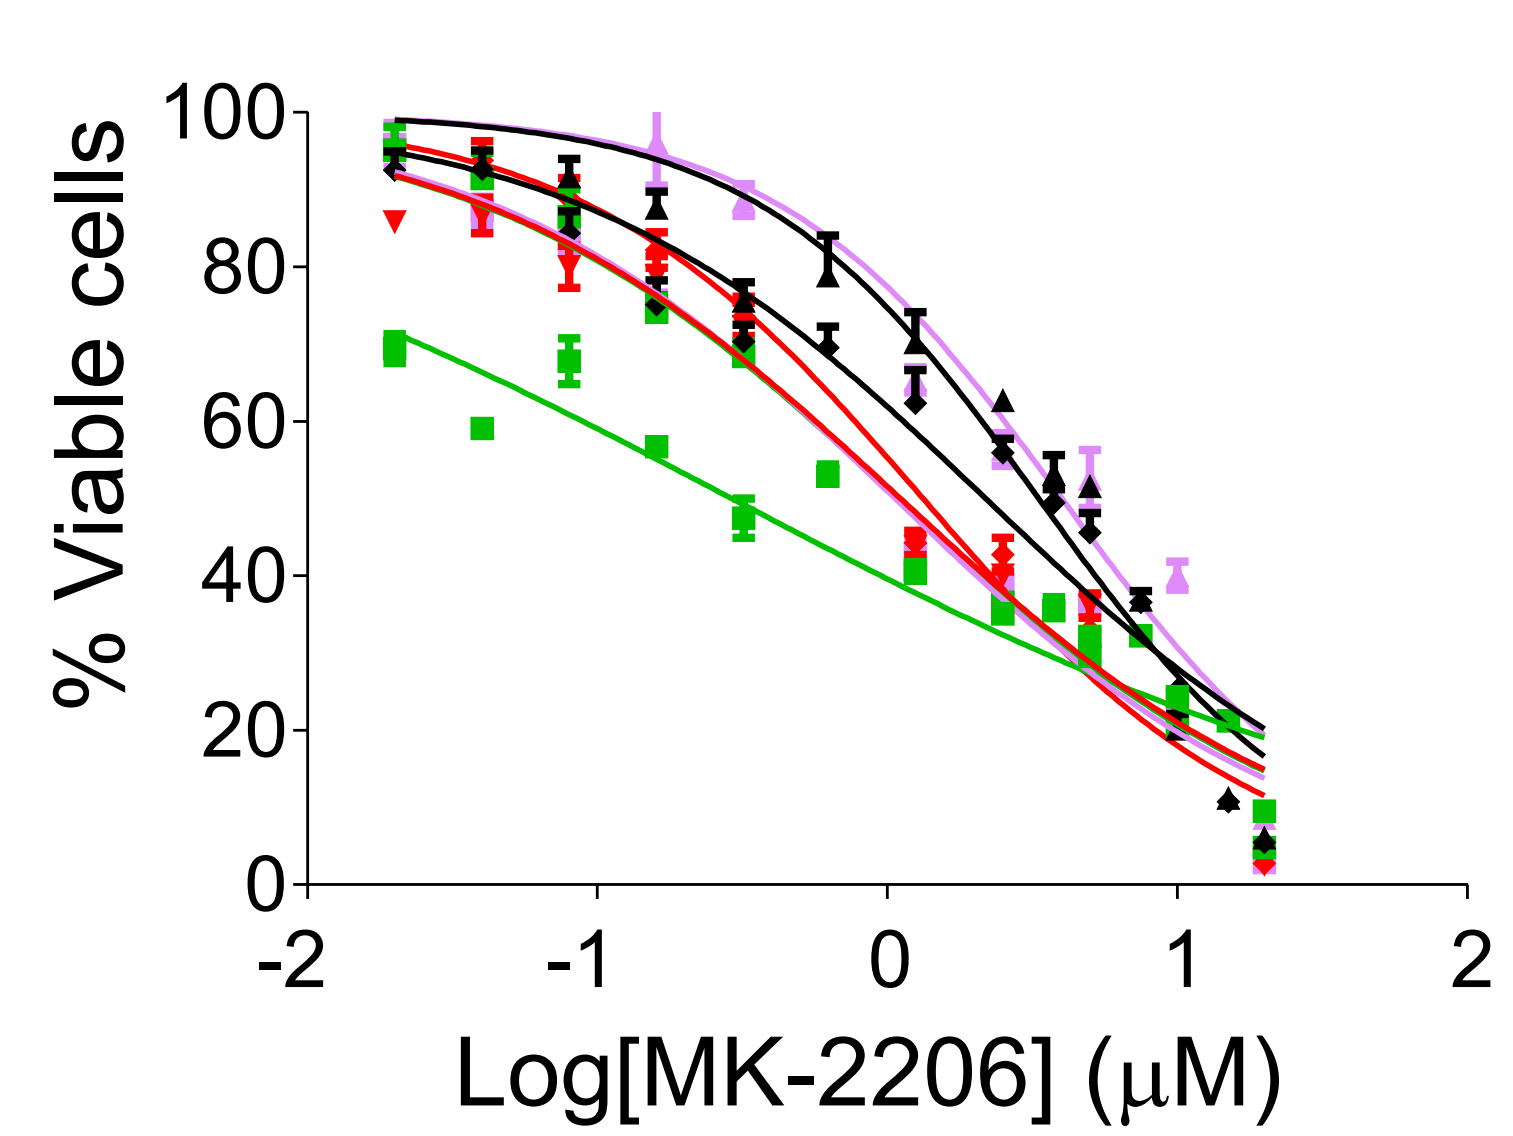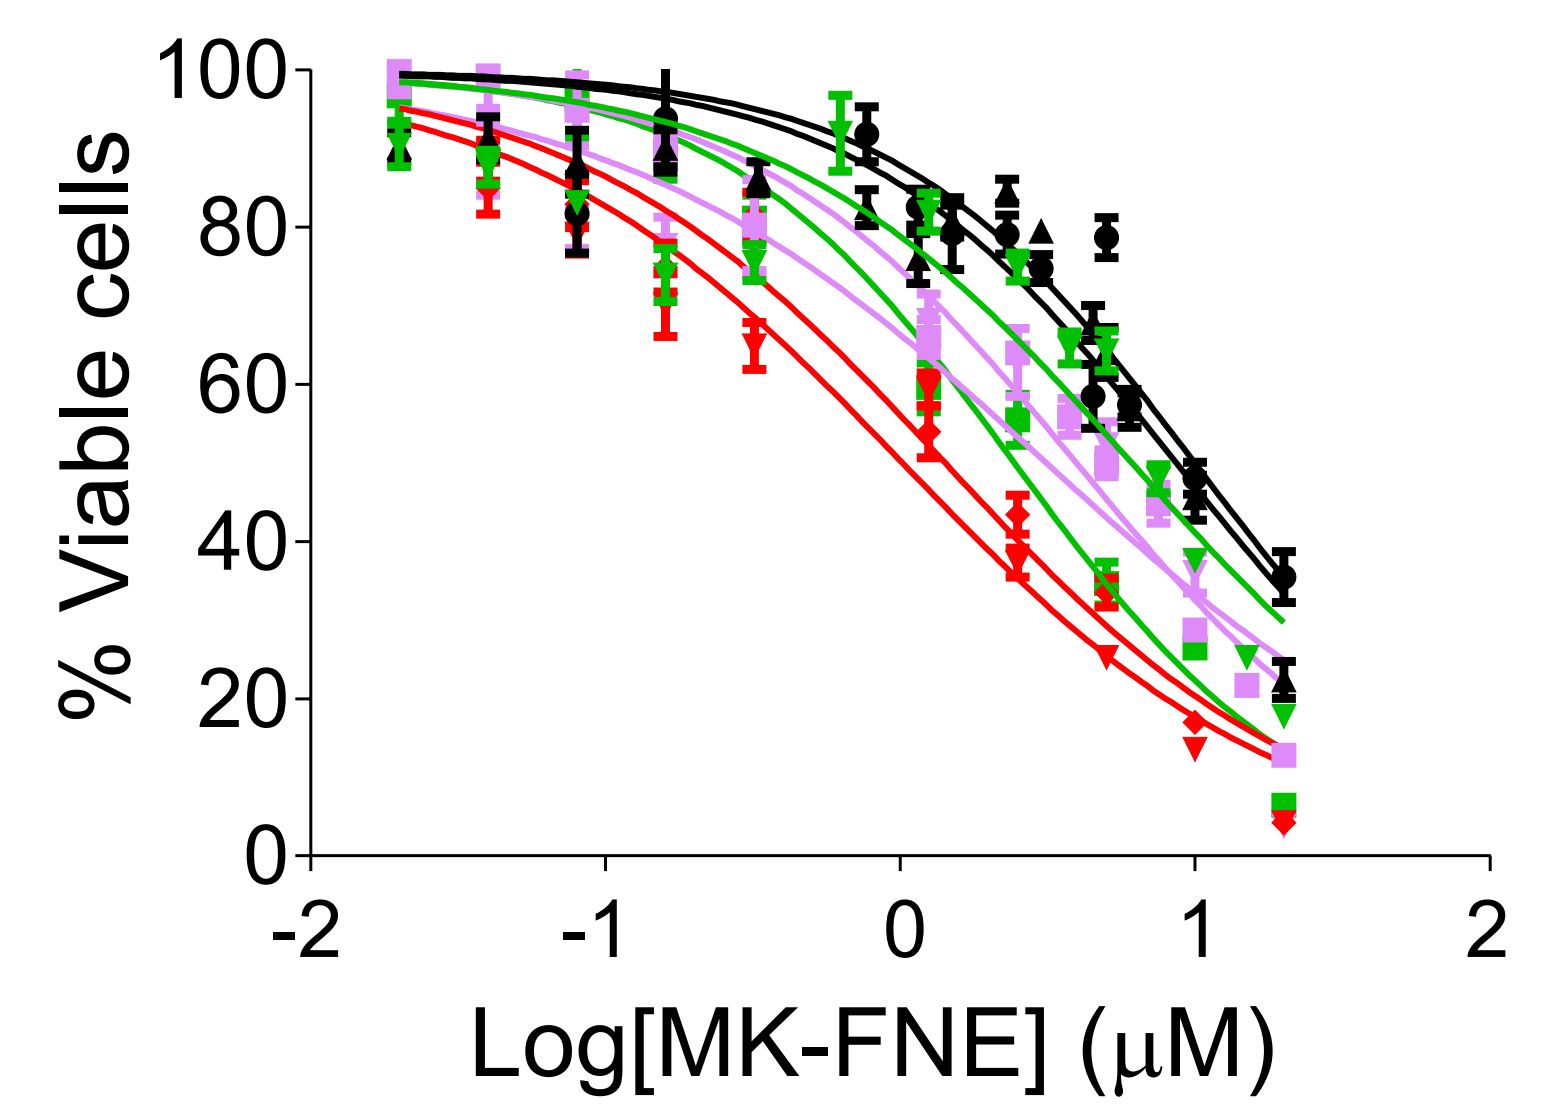

## Flow-cytometry analysis (related to **Supplementary Table S2**)

Cells were analyzed based on cellular DNA content using PI dye (excited at 488 nm) to quantitate the percentage of cells in the respective phases ( $G_1$ , S,  $G_2/M$  and sub- $G_0$ ) of the cell cycle. Flow experiments were carried out on separate days using MDA-MB-468 in different passage numbers. Each treatment group was normalized relative to the respective DMSO control group on the same day. The relative mean percentages of cell cycle arrest by the tested compounds are summarized in Supplementary Table S2.

# Gating demonstration: control samples

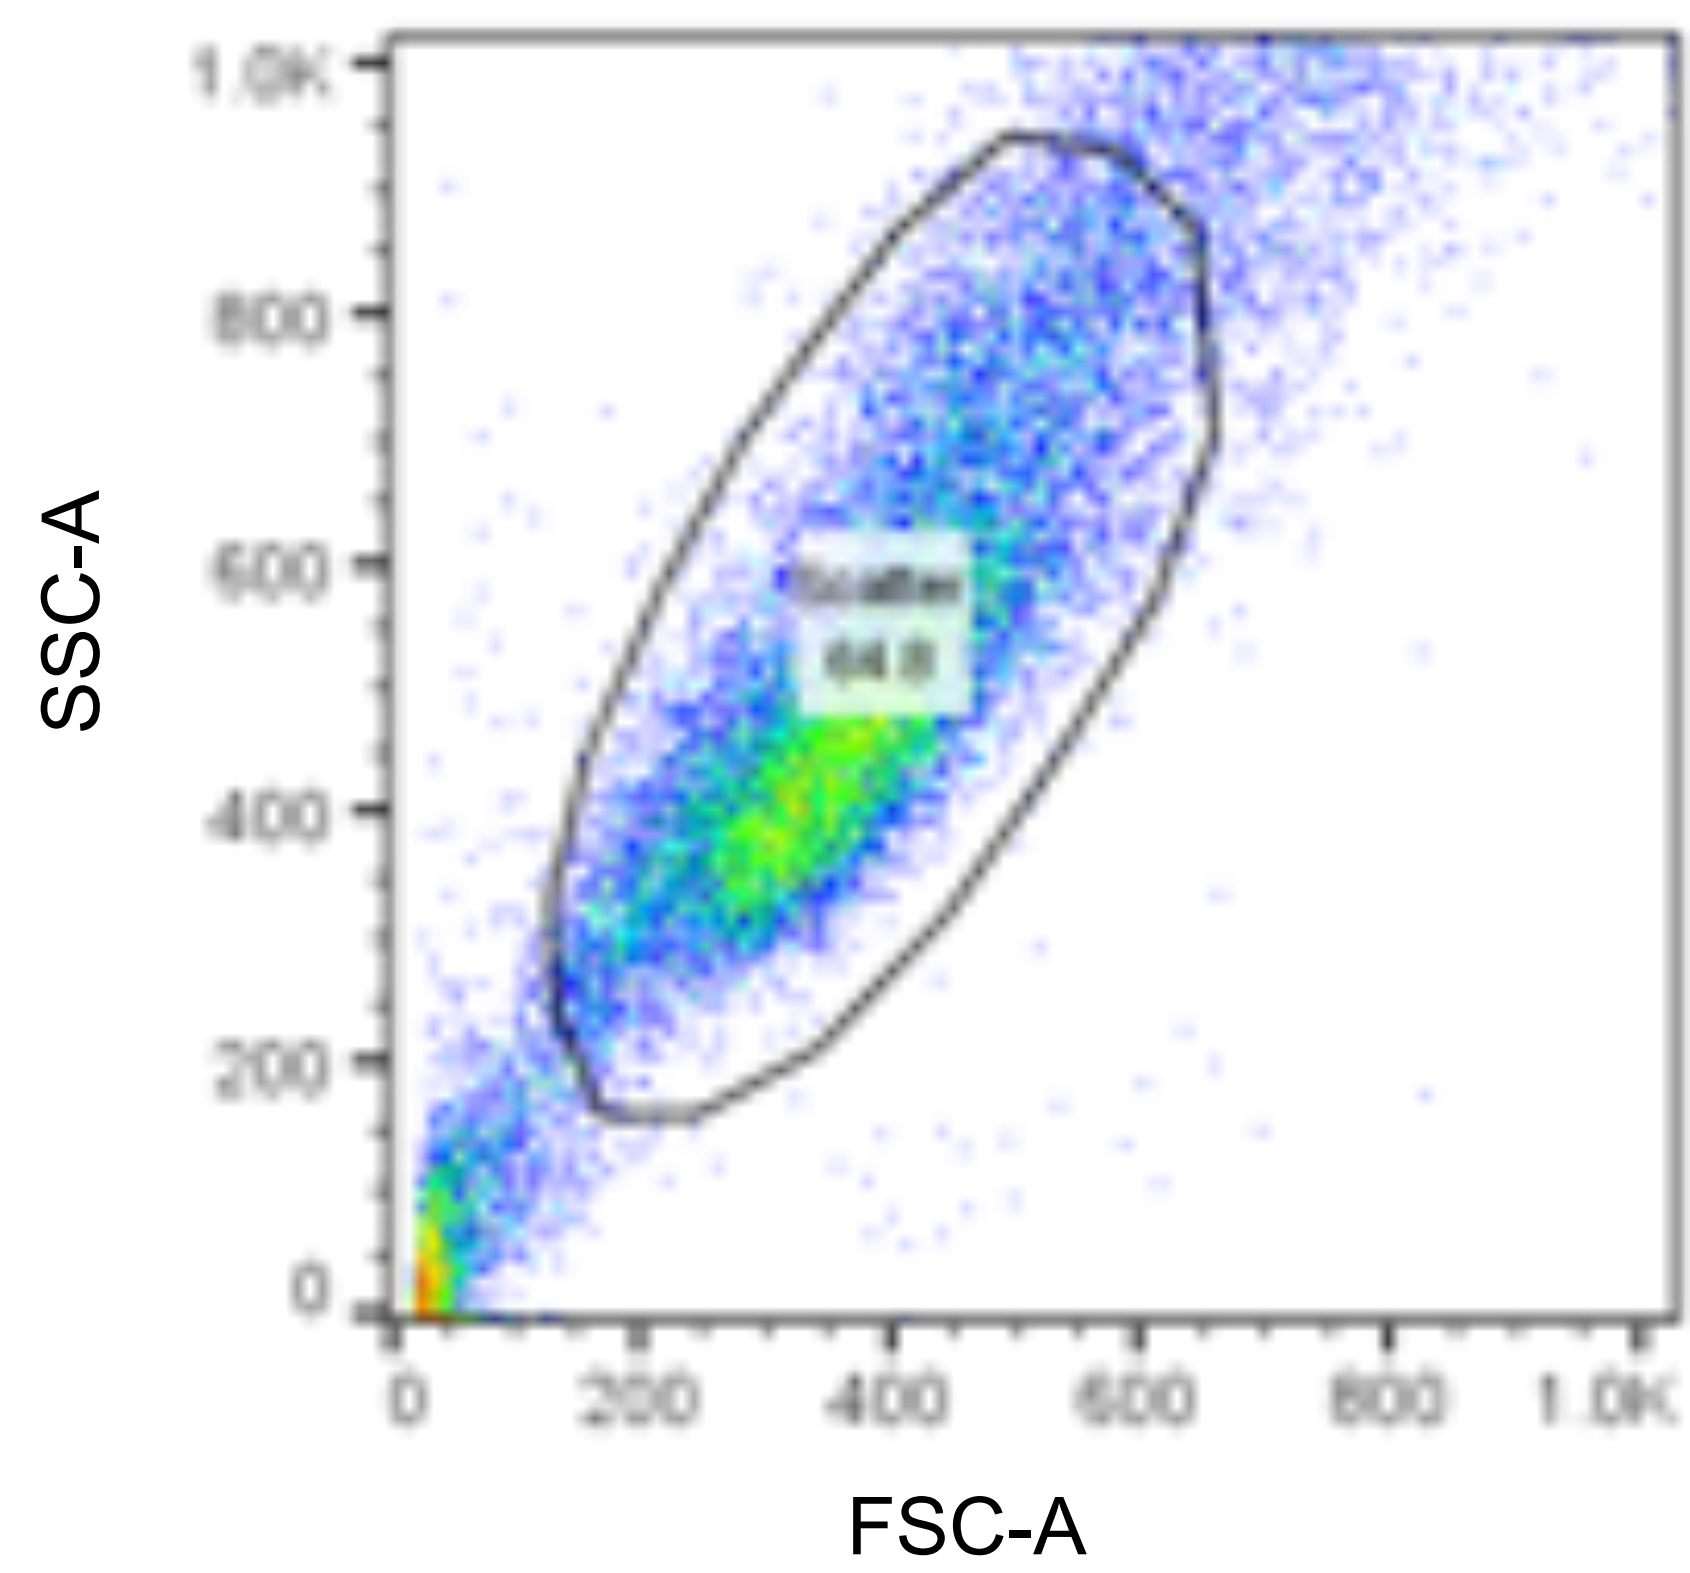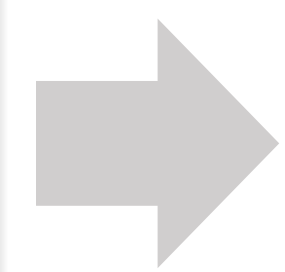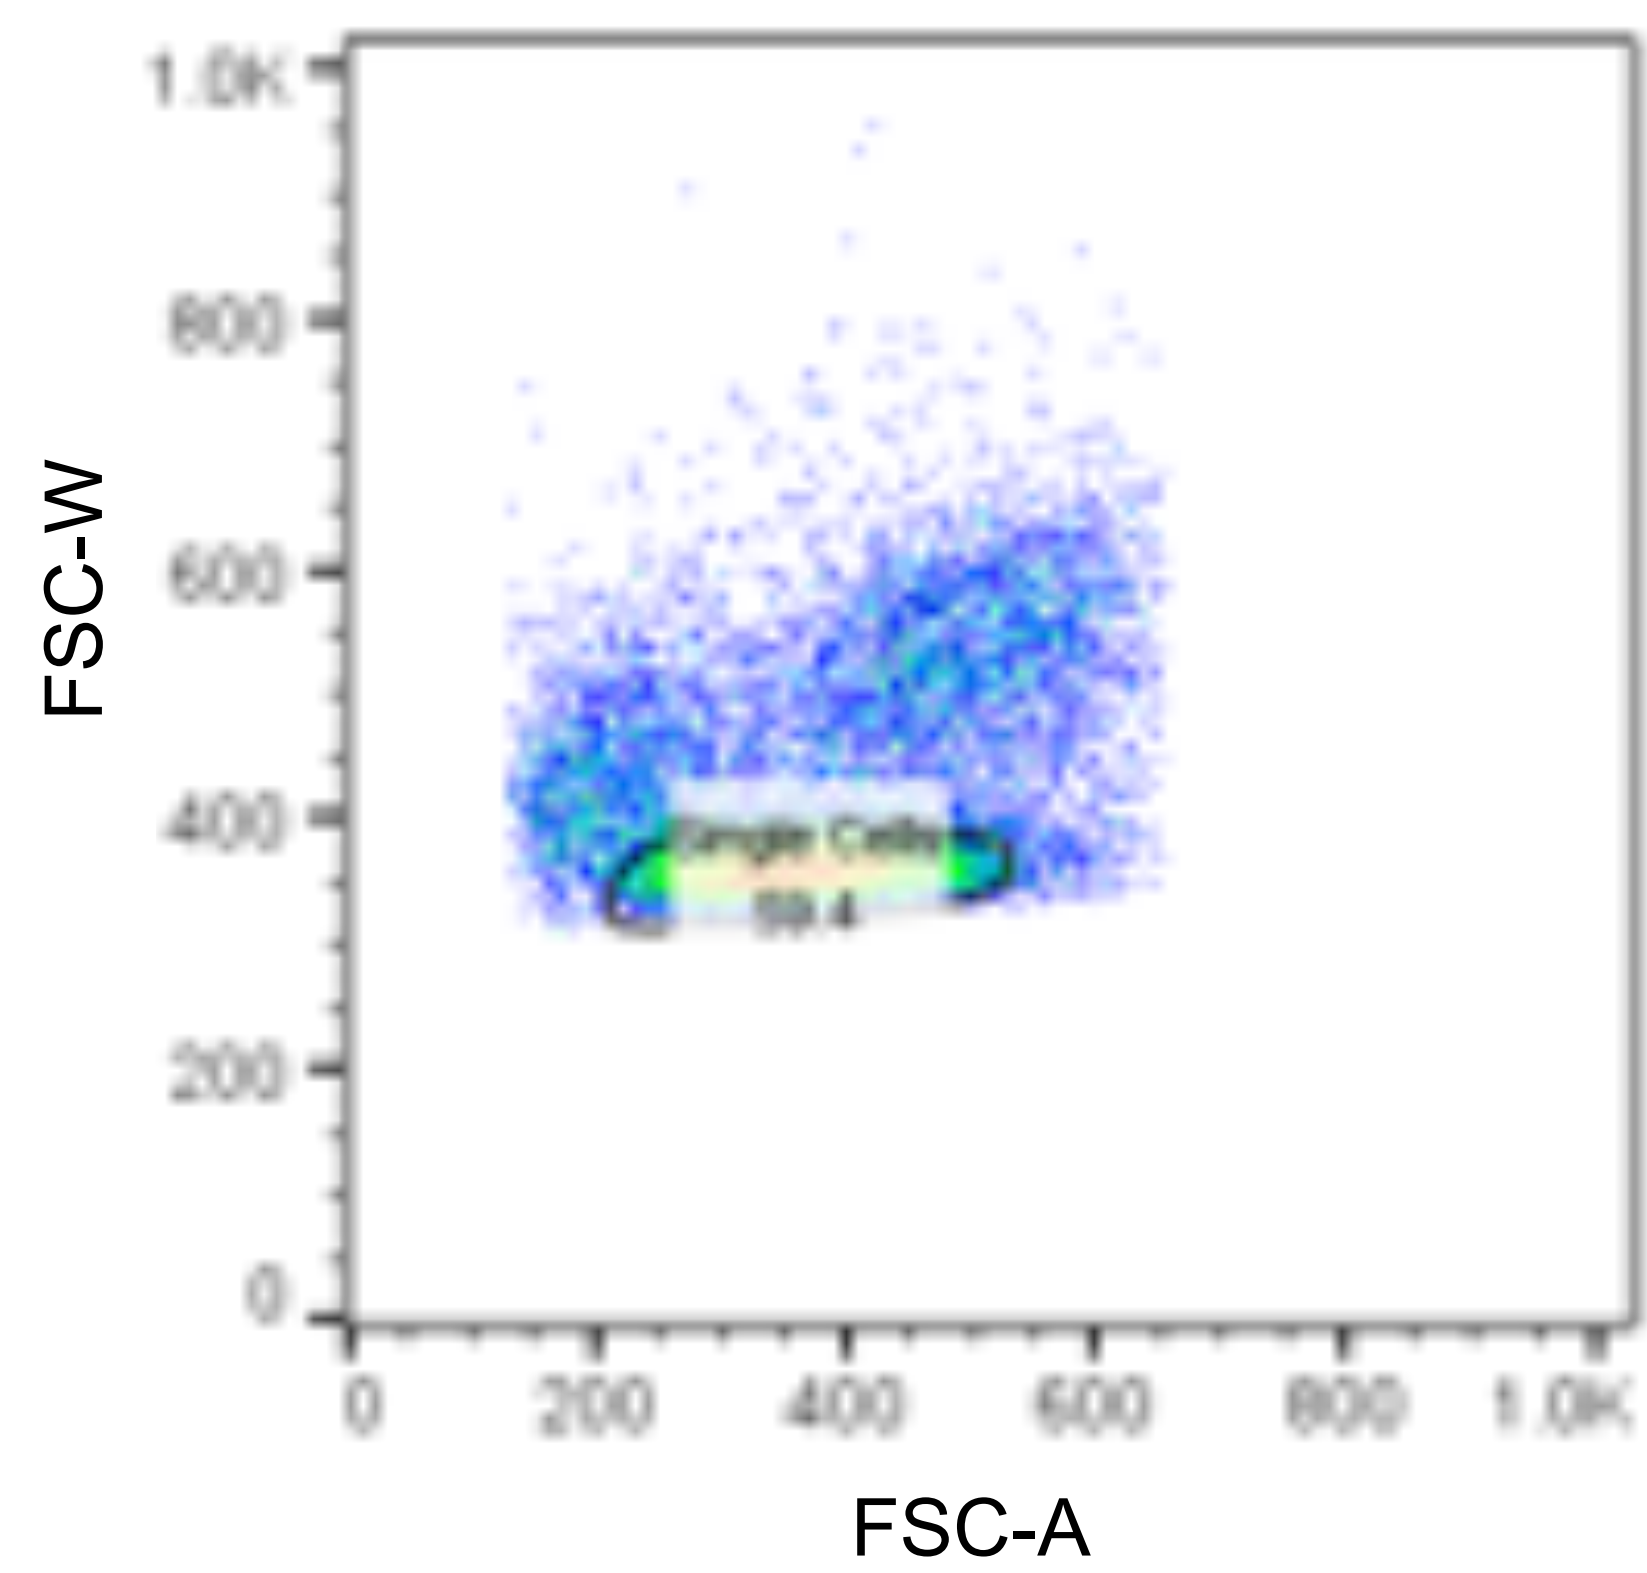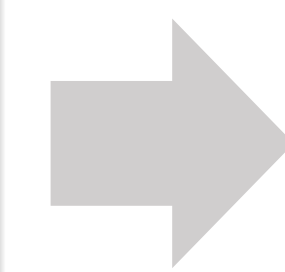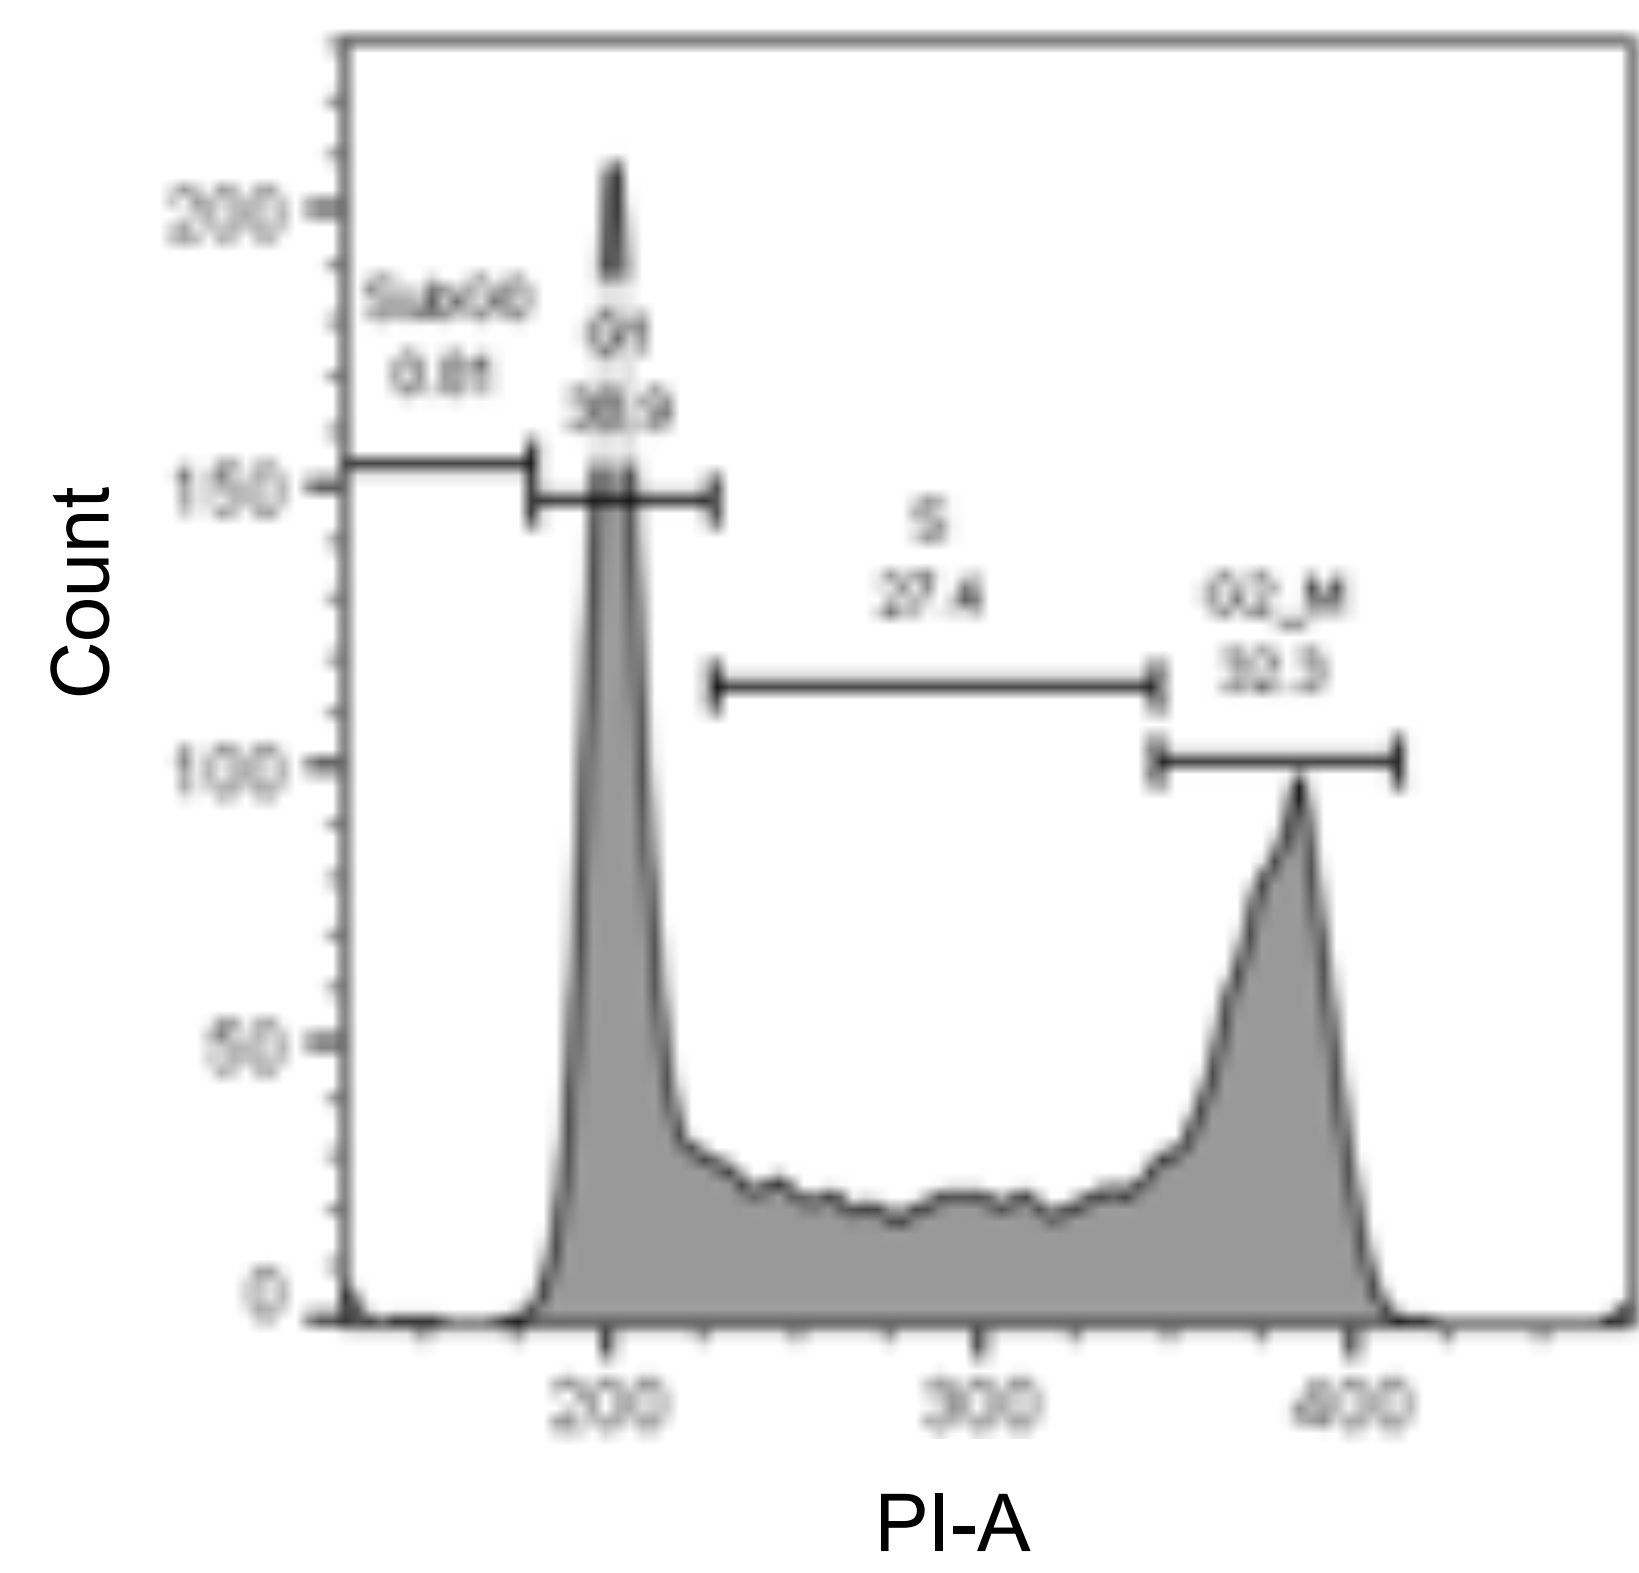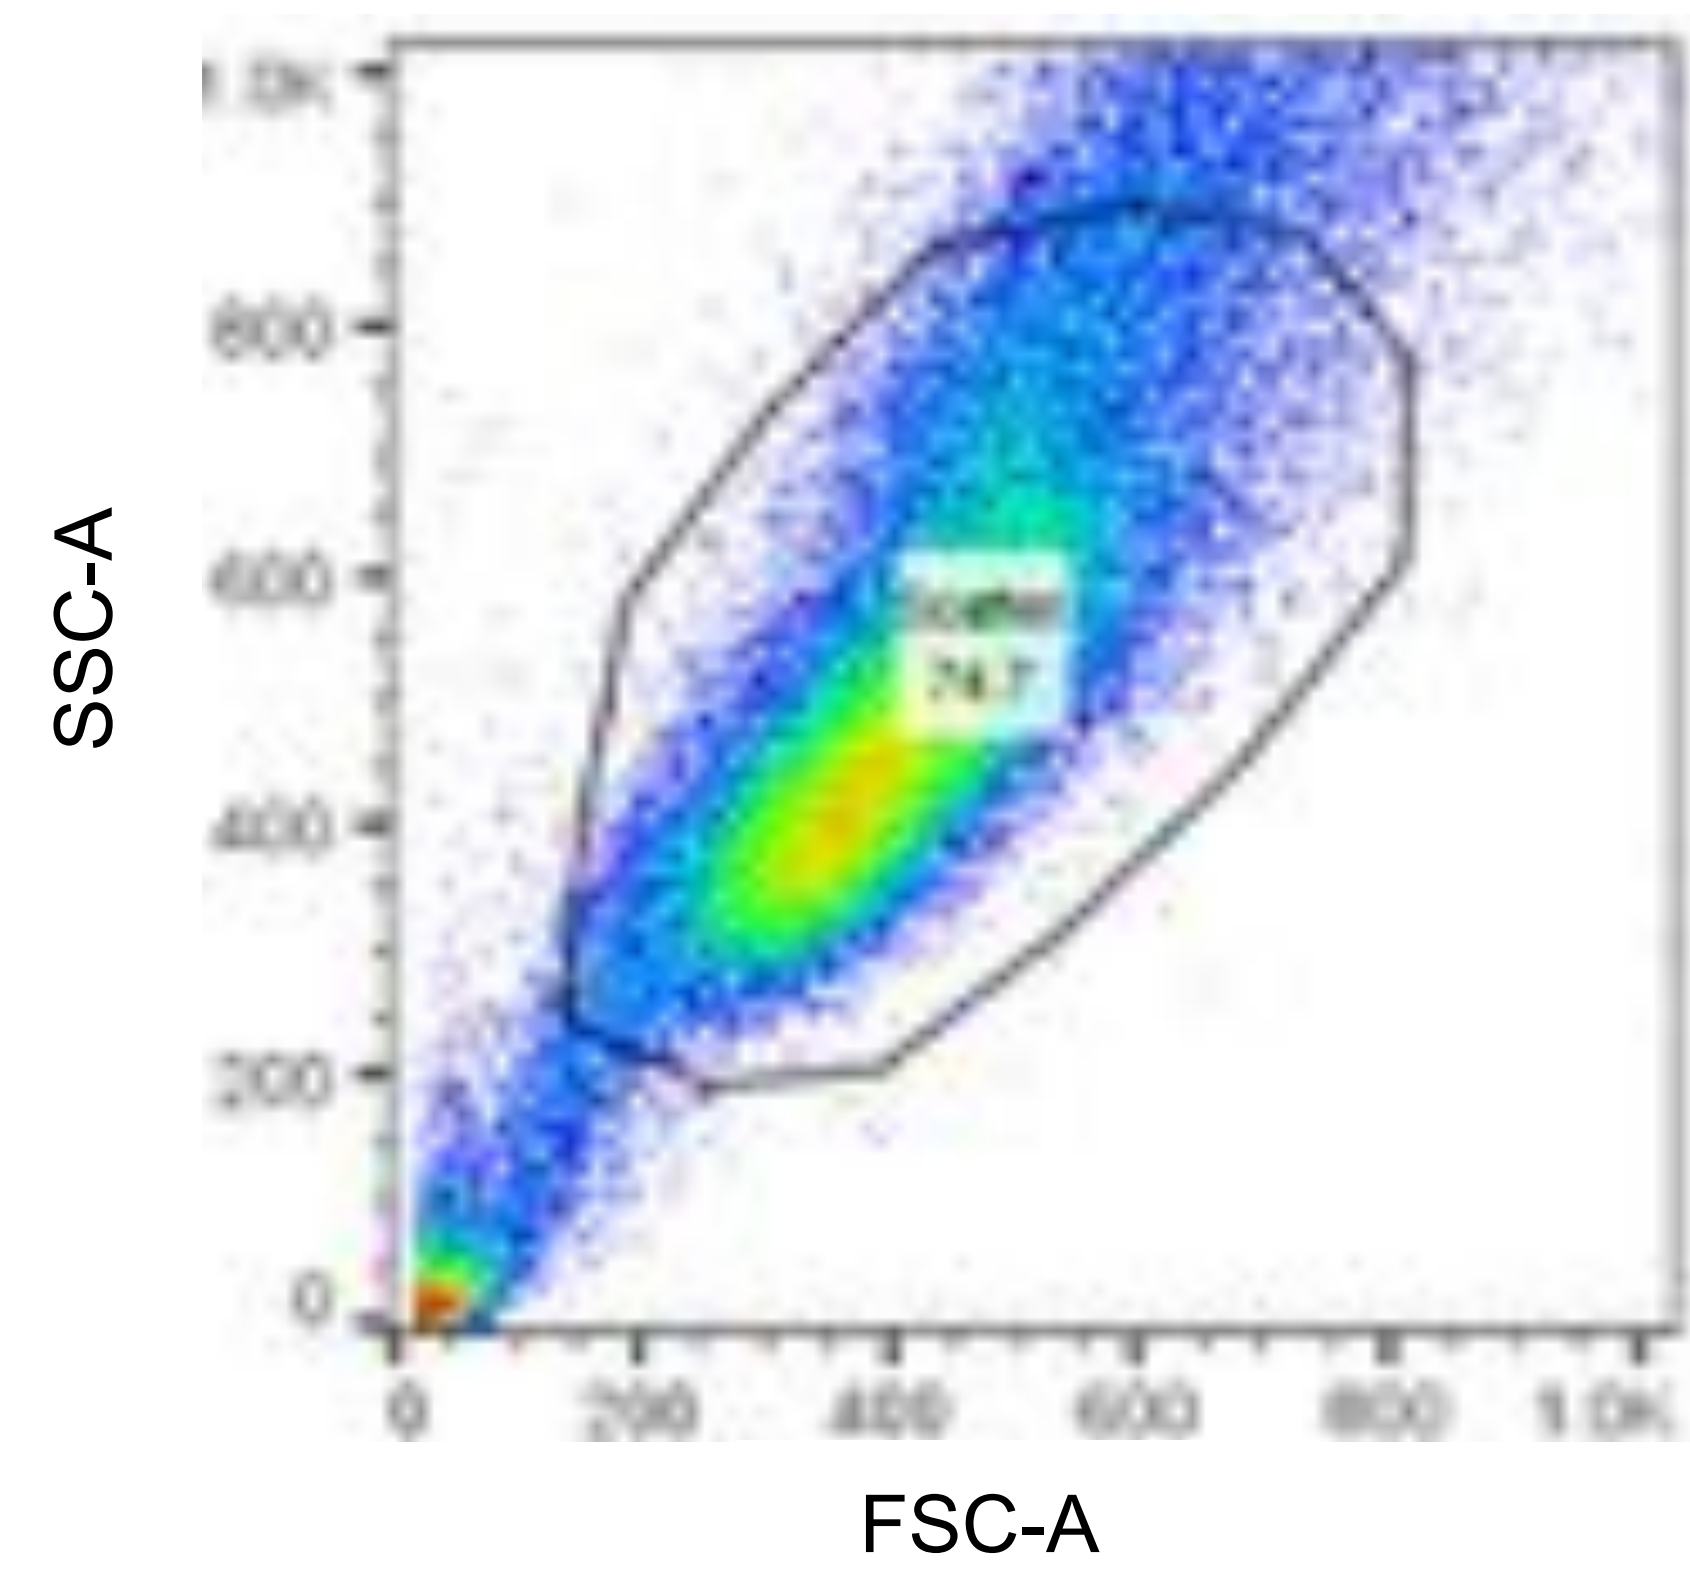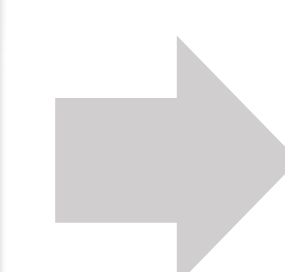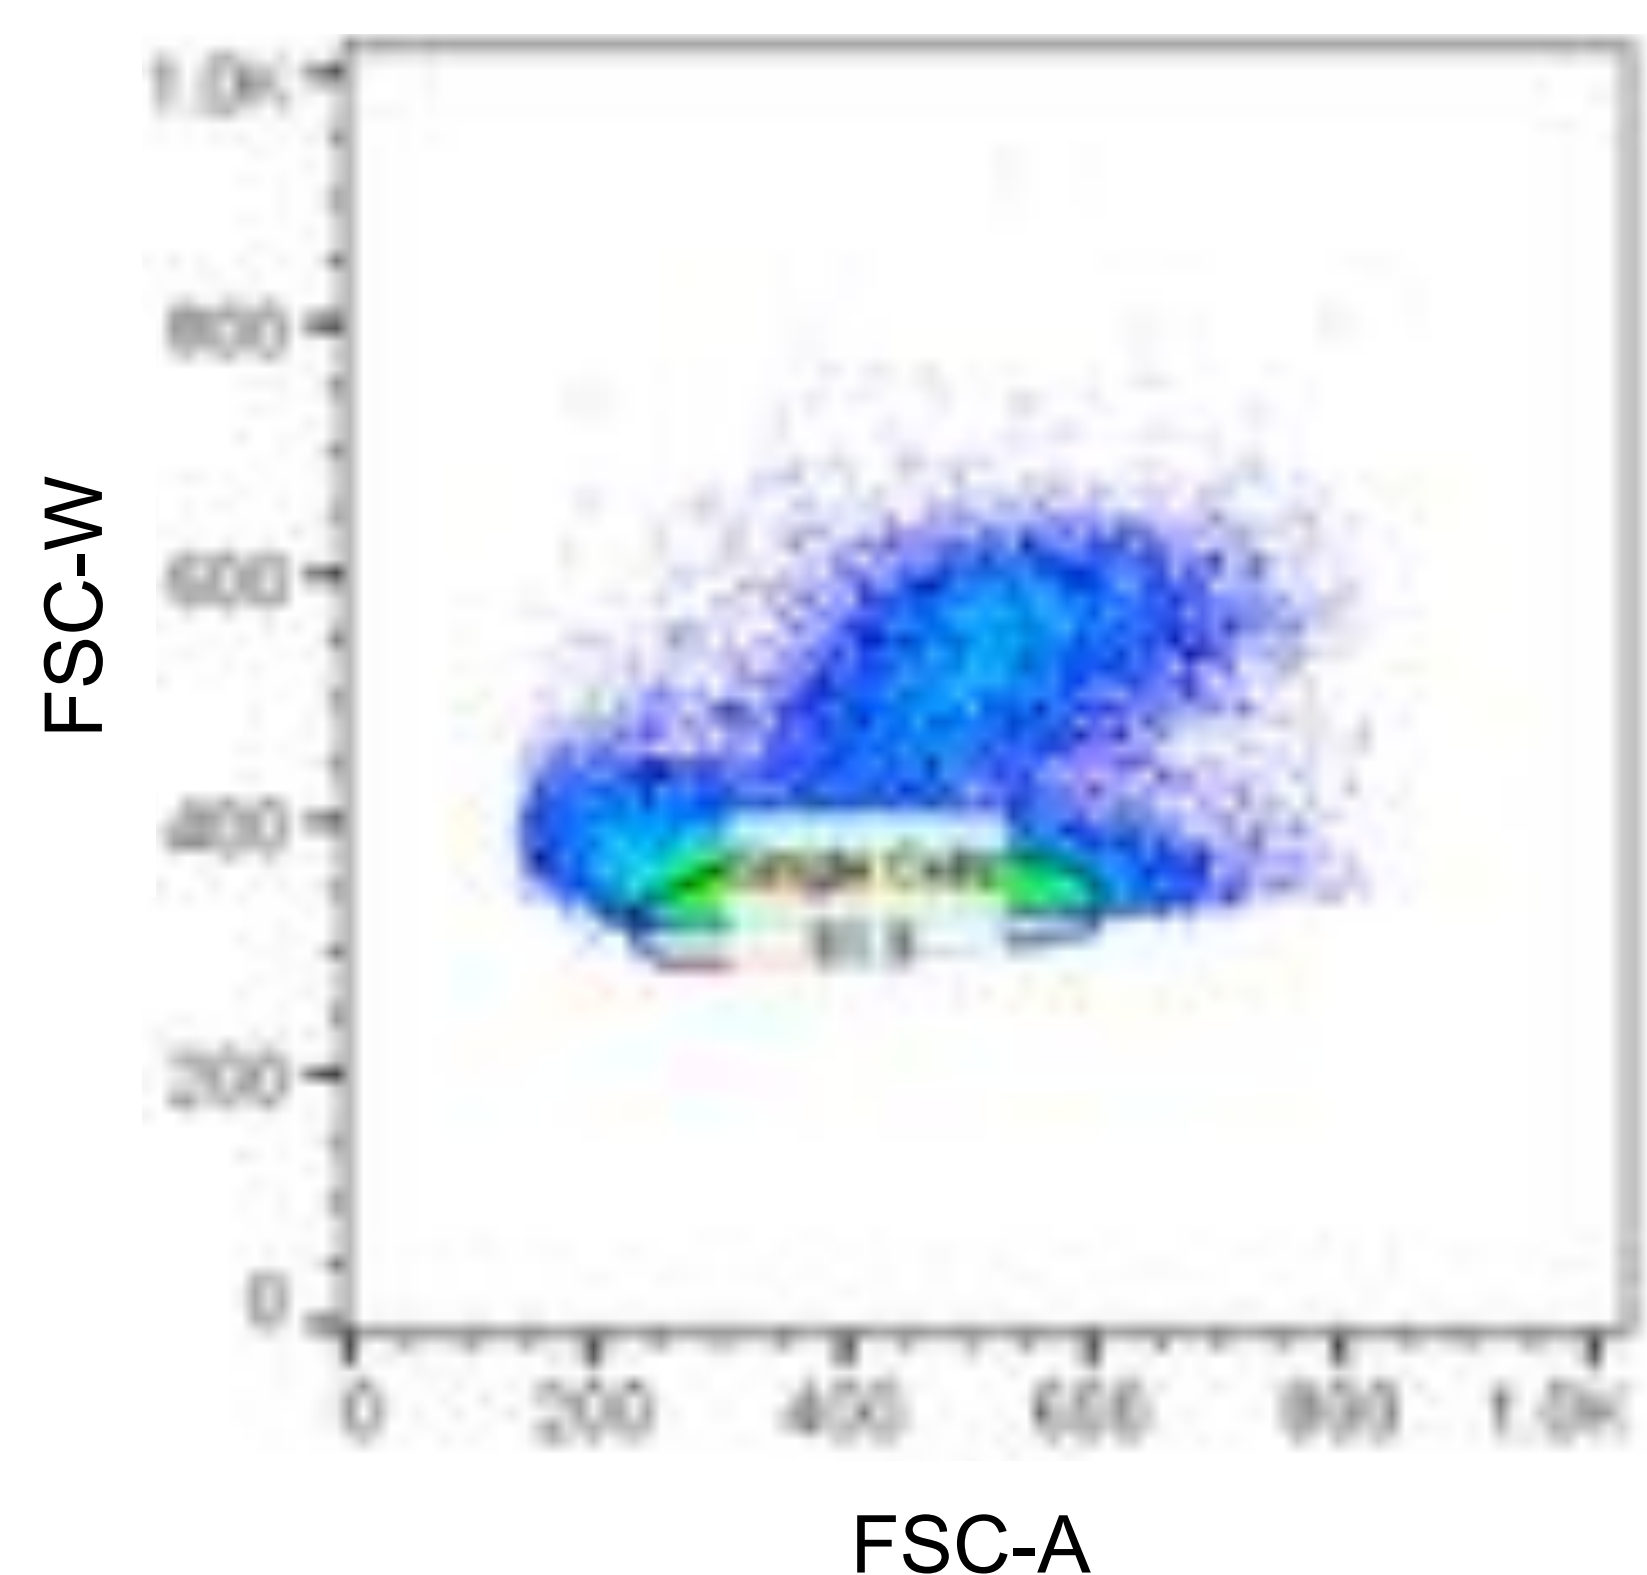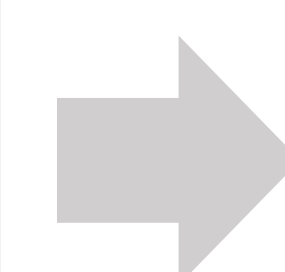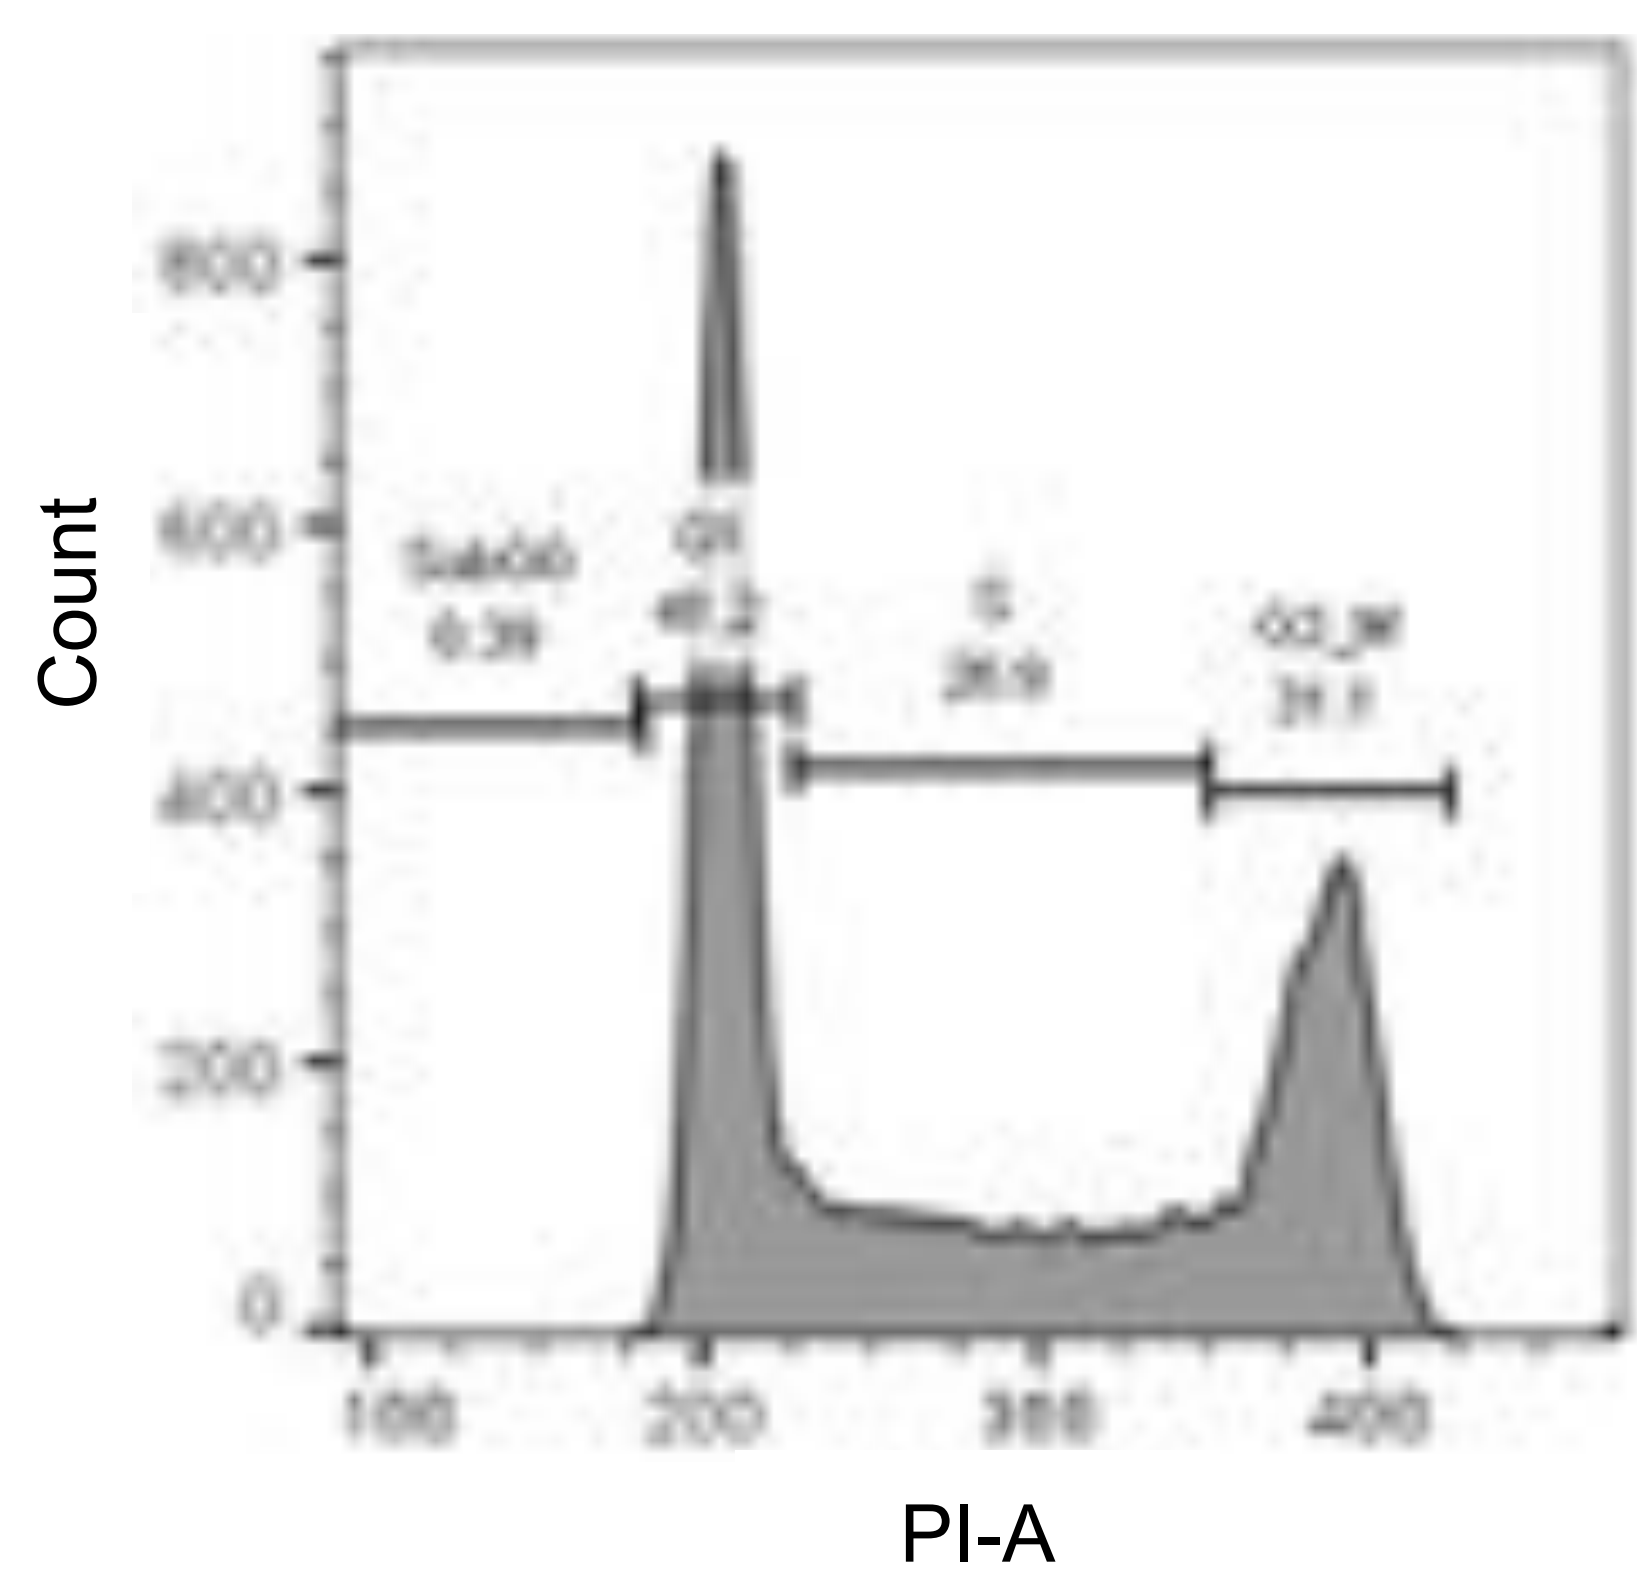

# Representative FACS analysis of cell cycle arrest

## DMSO

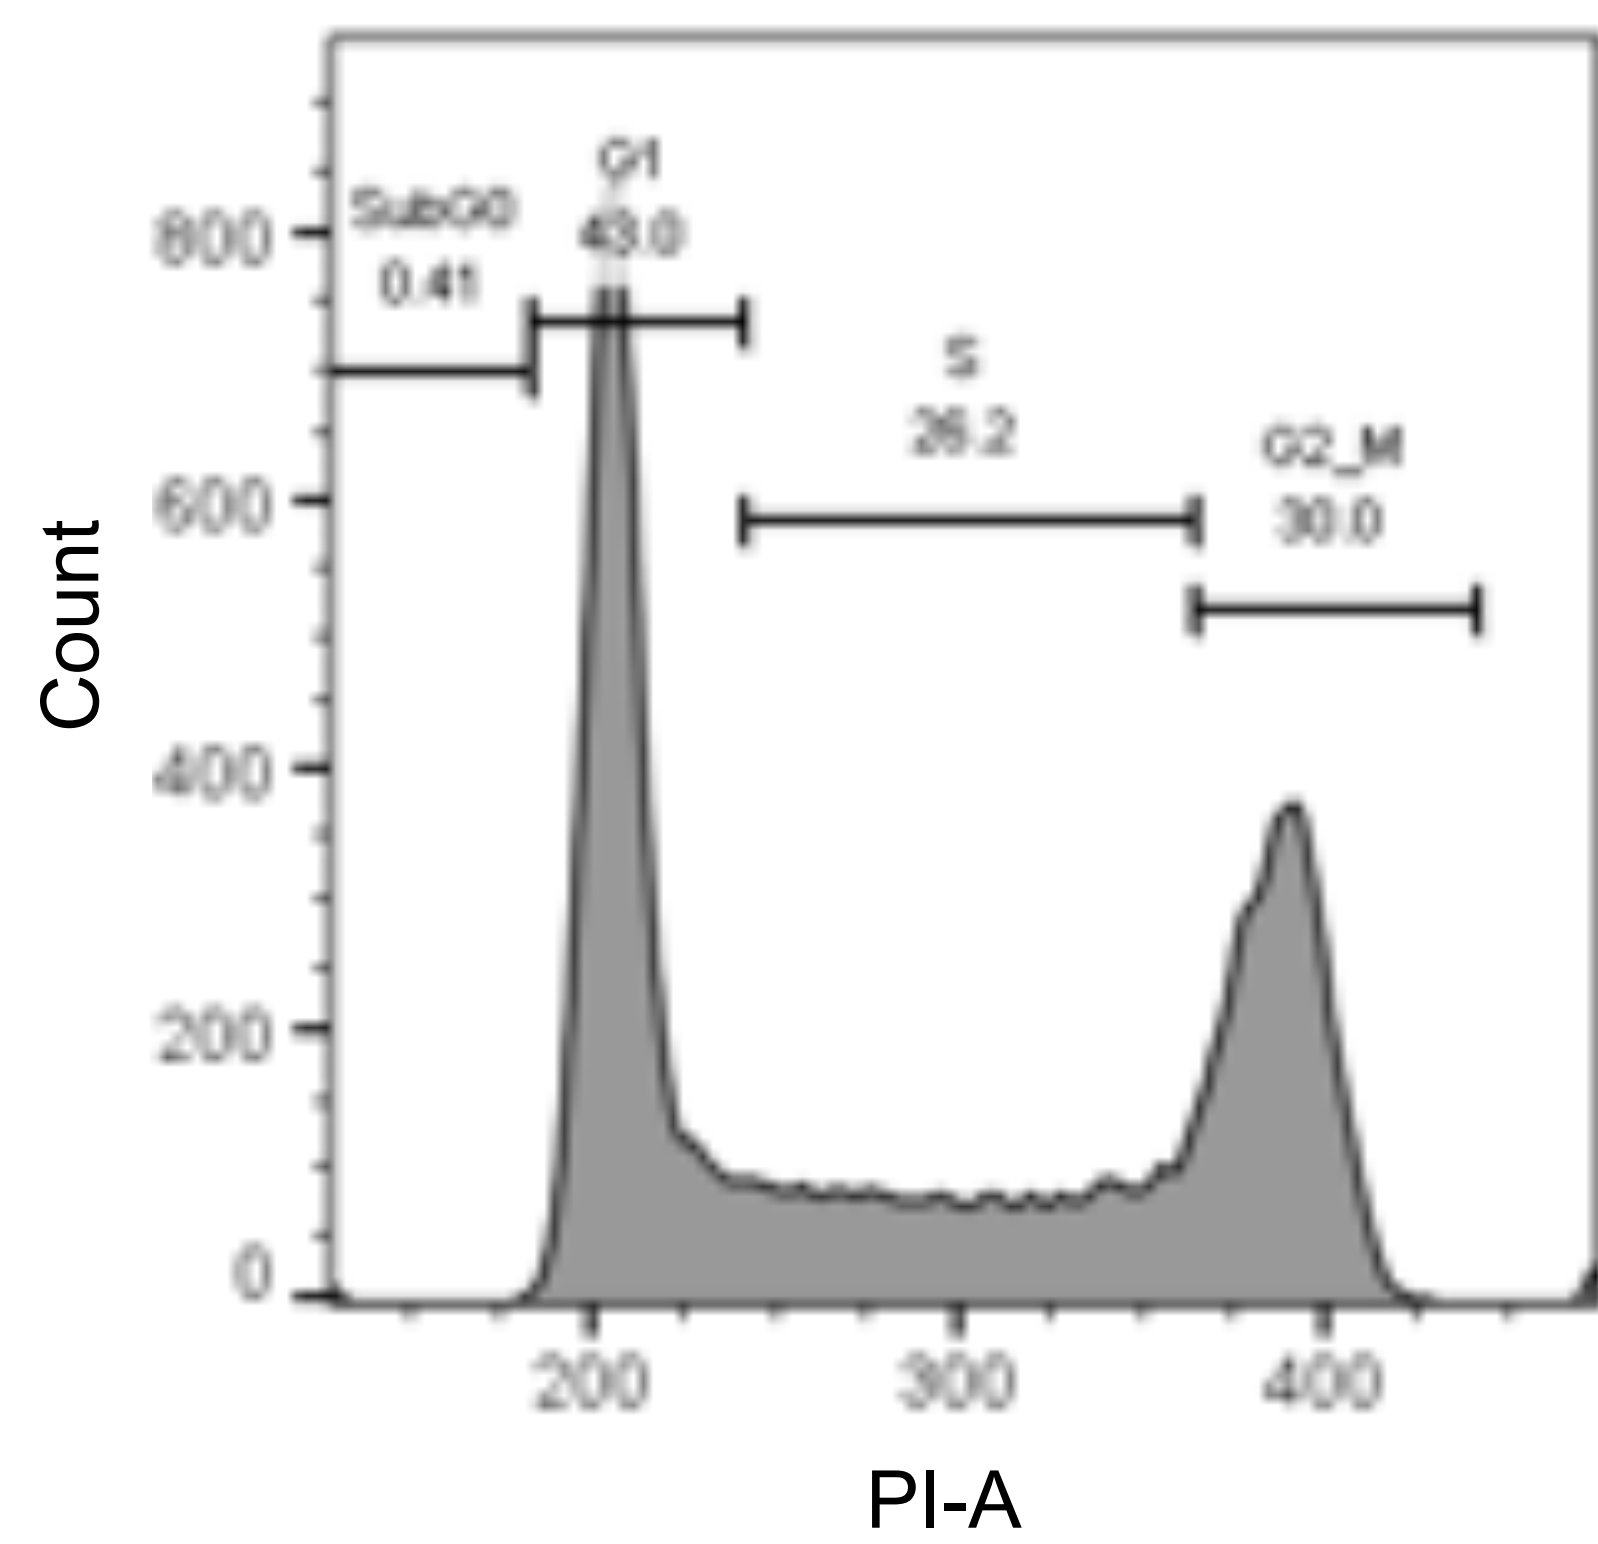

## MK-2206 (EC80)

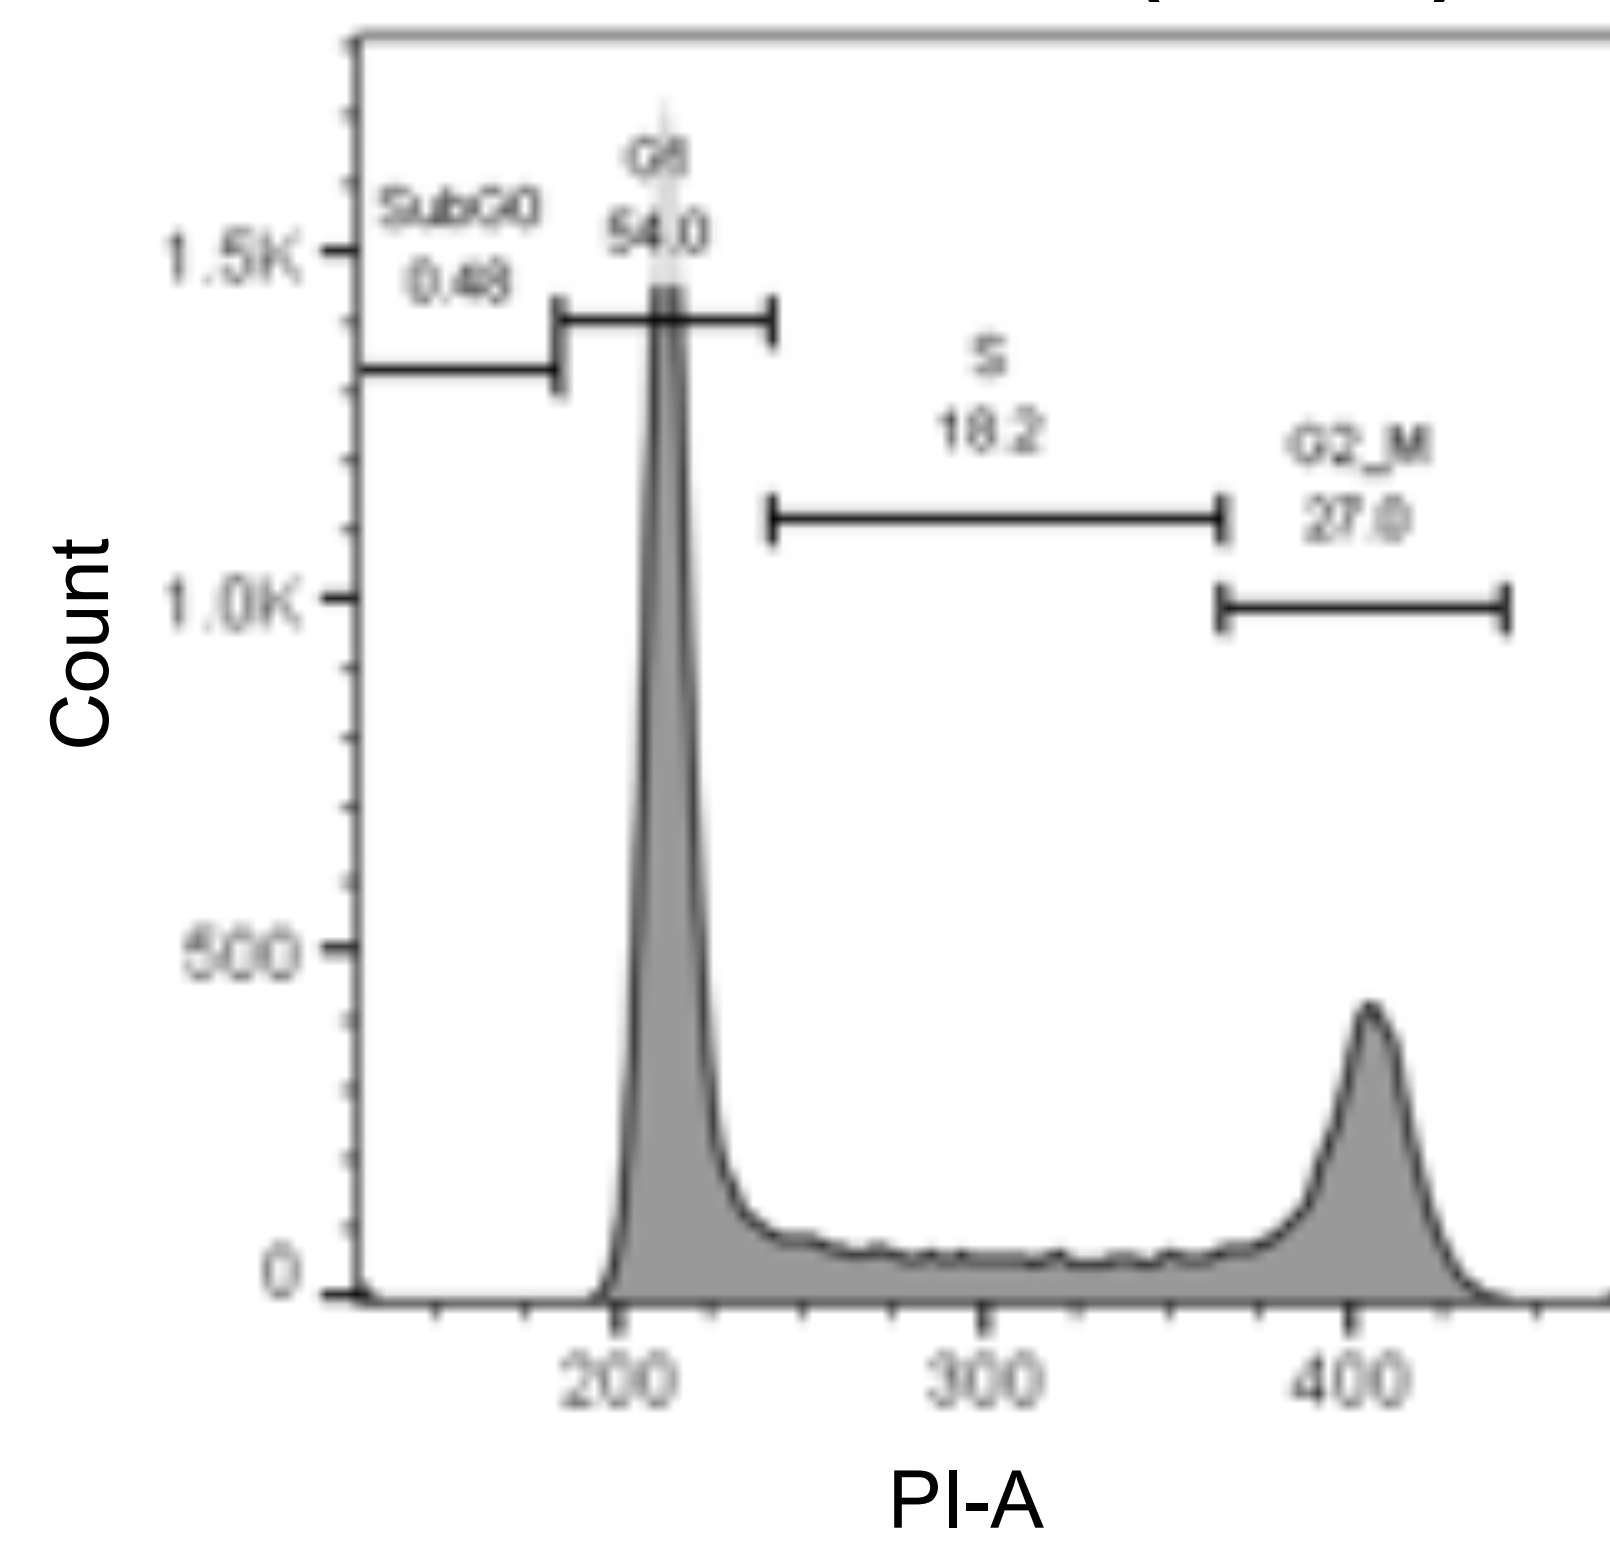

## DMSO

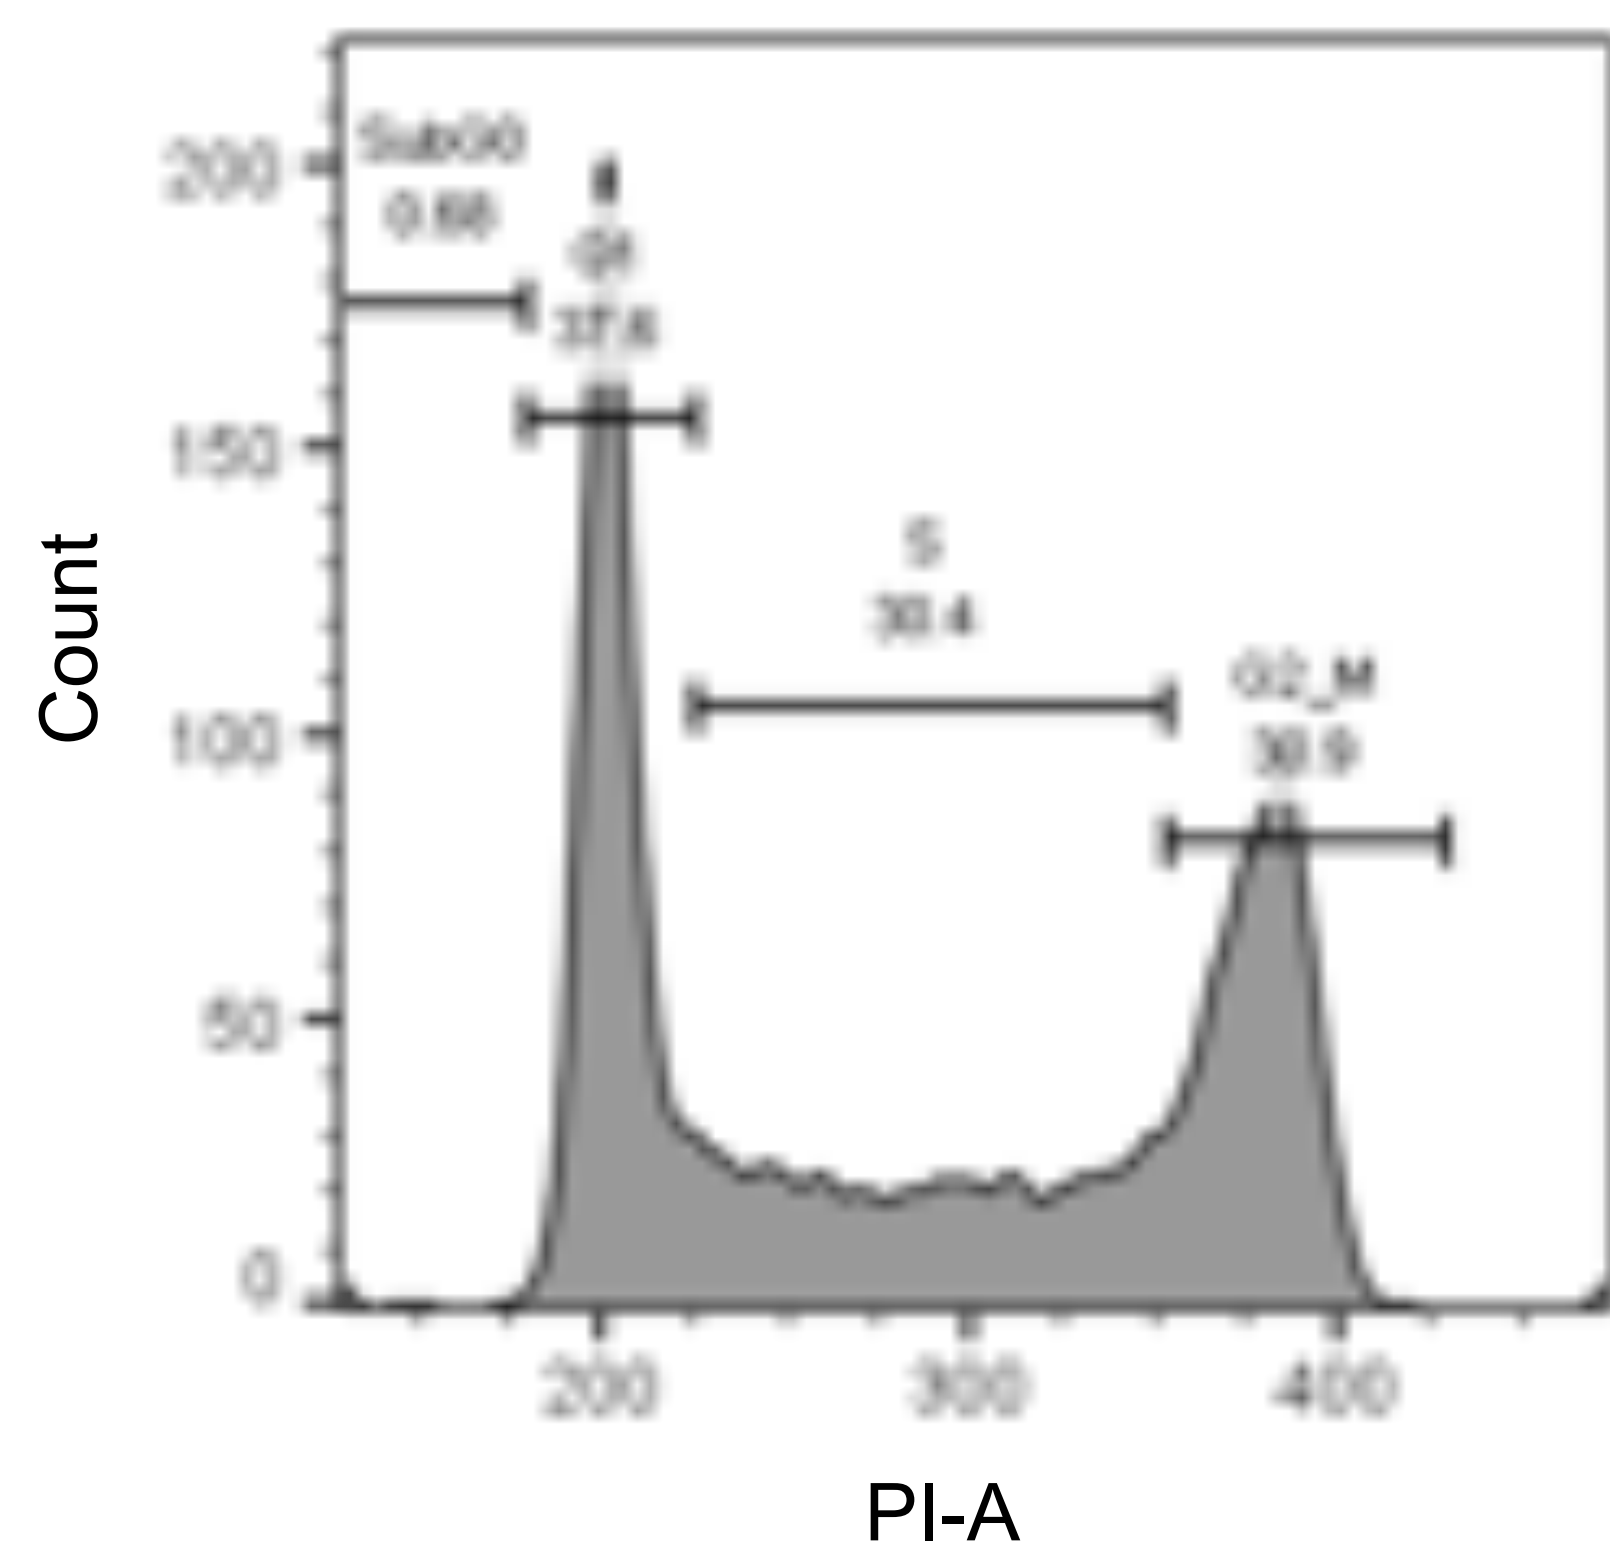

## MK-HNE (EC80)

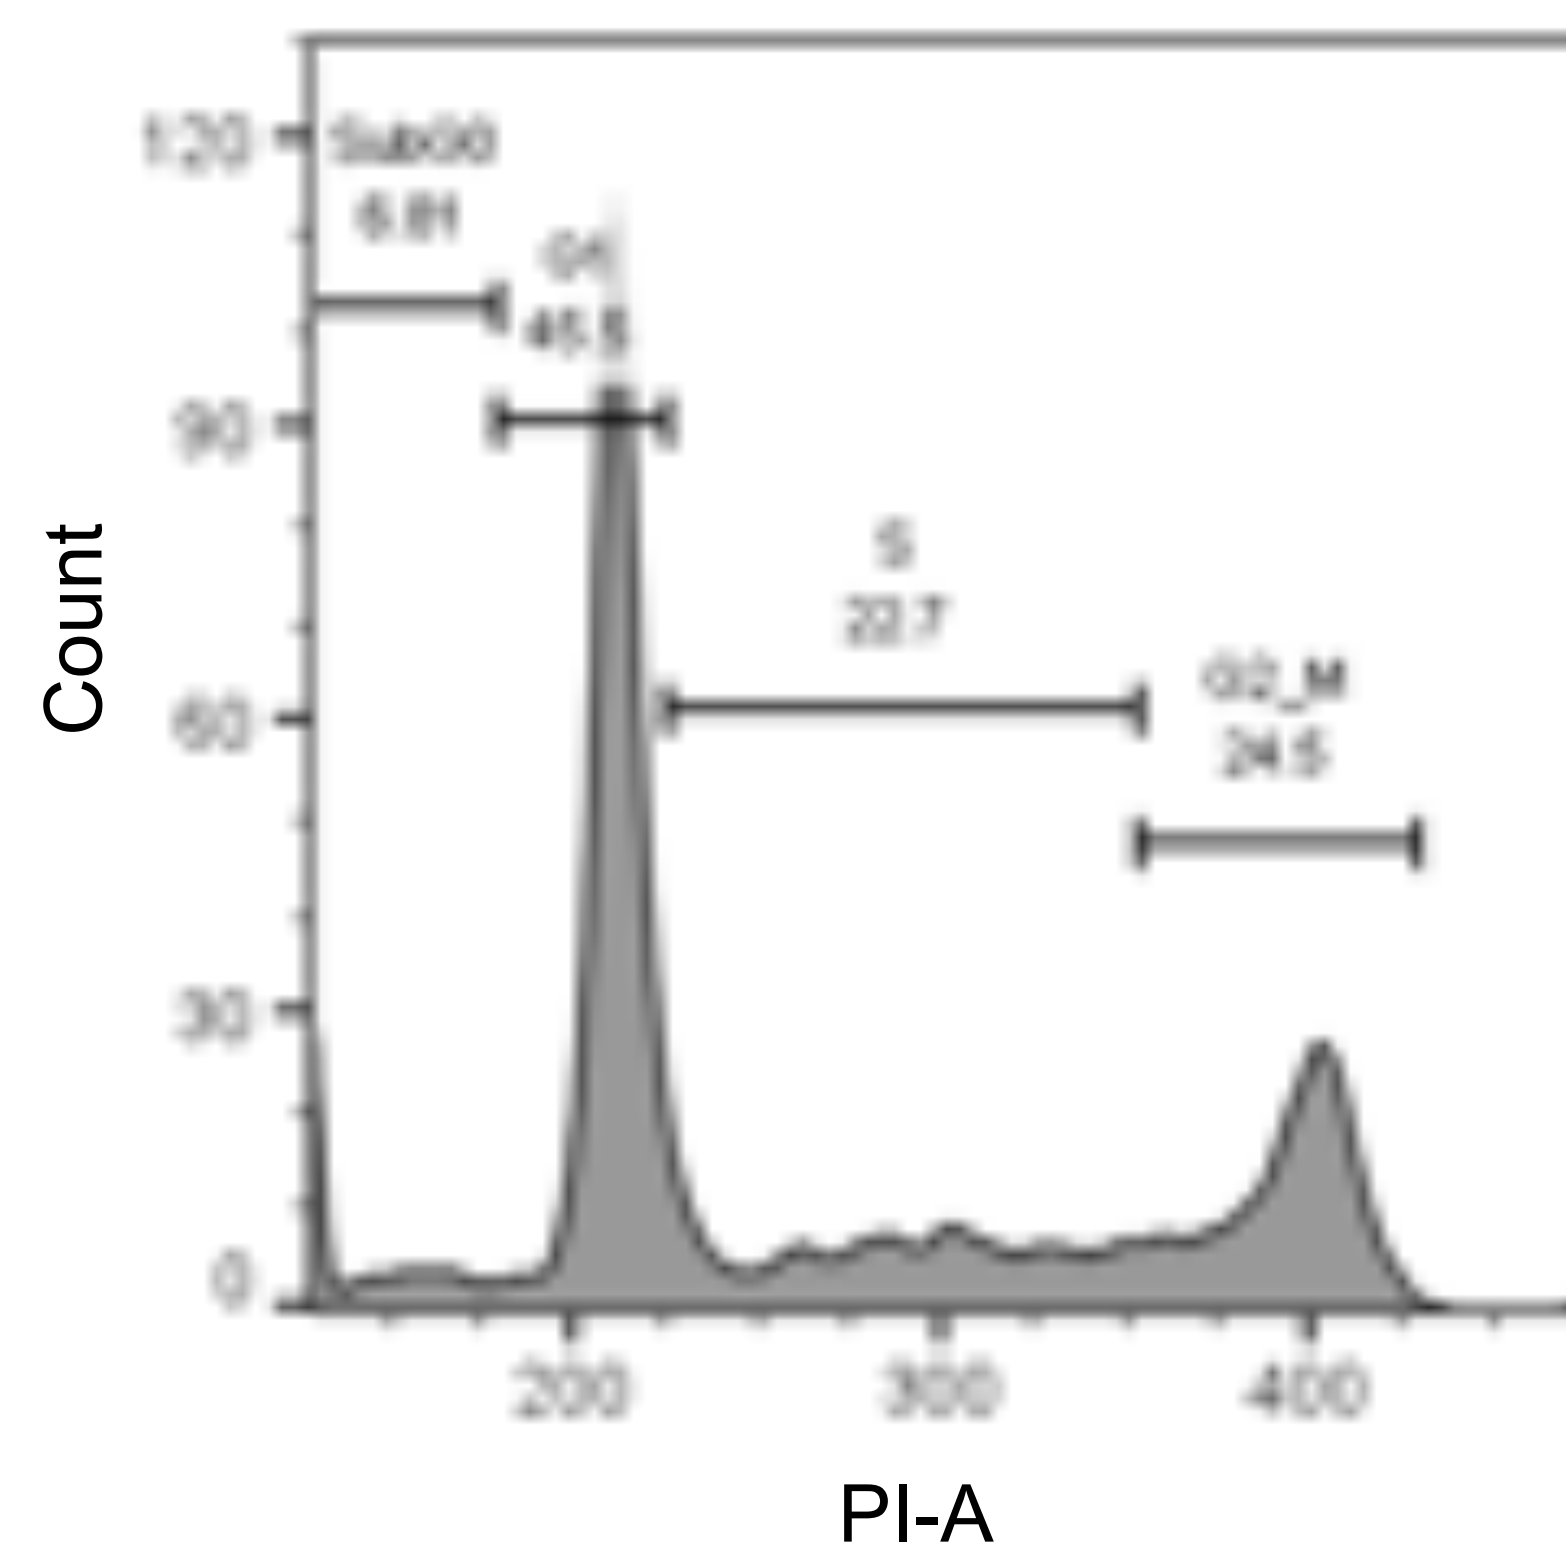

## MK-FNE (EC80)

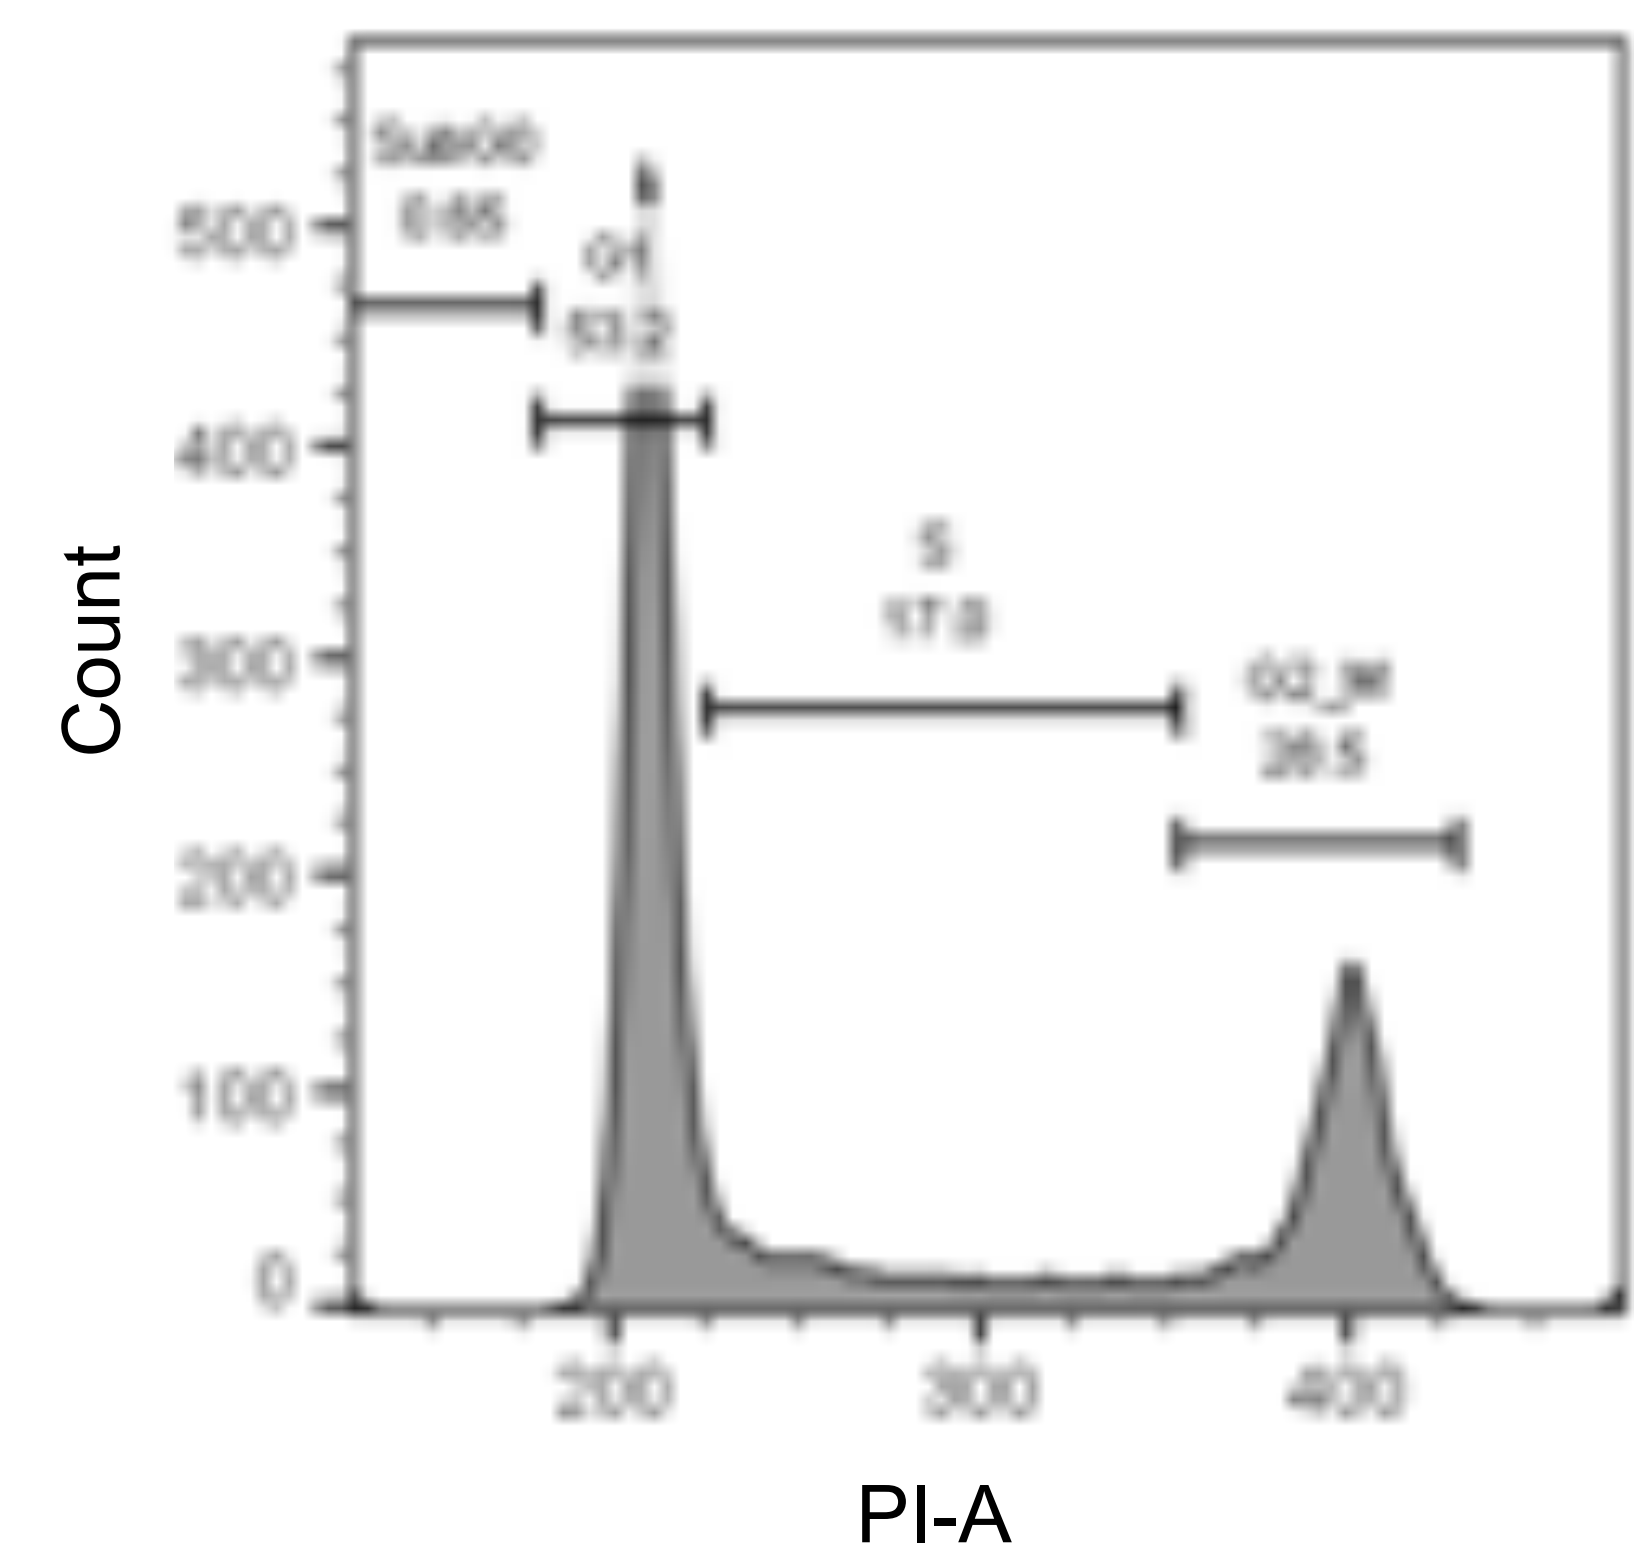

Supplement: oc9b00893_si_002.pdf [file oc9b00893_si_002.pdf]
